# Supplementary material for: Examining the dynamics of three-dimensional genome organization with multitask matrix factorization
Source: HighWire-hosted journal article supplement (doi:10.1101/gr.279930.124), 2025-03-20
Supplement: Supplemental_Code_S2.tgz.zip [file select_terms.pdf › TGIF_evaluation_scripts_by_figure/SuppTab9/3_look_at_top_terms/select_terms.pdf]

1term

anatomical structure morphogenesis  
 cellular component organization  
 cellular component organization at cellular level  
 cellular component organization or biogenesis  
 cellular component organization or biogenesis at cellular level  
 cellular macromolecule biosynthetic process  
 cellular macromolecule metabolic process  
 cellular metabolic process  
 cellular process  
 cellular protein metabolic process

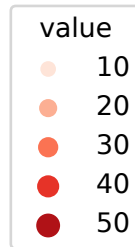

DE near DB(H1vsendoderm)

DE not near DB(H1vsendoderm)  
 variable
