# Supplementary material for: Examining the dynamics of three-dimensional genome organization with multitask matrix factorization
Source: HighWire-hosted journal article supplement (doi:10.1101/gr.279930.124), 2025-03-20
Supplement: Supplemental_Code_S2.tgz.zip [file top_terms.xlsx]

## Sheet: Sheet1
term	ESvsCN: DE NOT near DB	ESvsCN: DE near DB	ESvsNPC: DE NOT near DB	ESvsNPC: DE near DB	NPCvsCN: DE NOT near DB	NPCvsCN: DE near DB
DNA_repair					11.6
DNA_replication		13.3			30.5
axon_guidance						17
cell_adhesion		13.3	13.6	27.7	20.7
cell_cycle		12.1			32.4	17
cell_differentiation			32.9
cell_division					29
cellular_response_to_leukemia_inhibitory_factor				16.8
homophilic_cell_adhesion_via_plasma_membrane_adhesion_molecules		20.5		36.3	32.4
multicellular_organism_development			33.1	25.8
nervous_system_development		14.2	17.8		23.3
neuron_differentiation			17.6
positive_regulation_of_synapse_assembly			12
positive_regulation_of_transcription_by_RNA_polymerase_II				14.4
rRNA_processing	13.8				29
regulation_of_transcription_by_RNA_polymerase_II			13.1
ribosome_biogenesis					29.6
translation	33.2	13.3			53.1
