# Supplementary material for: Examining the dynamics of three-dimensional genome organization with multitask matrix factorization
Source: HighWire-hosted journal article supplement (doi:10.1101/gr.279930.124), 2025-03-20
Supplement: Supplemental_Code_S2.tgz.zip [file top_terms.xlsx]

## Sheet: Sheet1
term	day0vsday15: DE NOT near DB	day0vsday15: DE near DB	day0vsday2: DE NOT near DB	day0vsday2: DE near DB	day0vsday5: DE NOT near DB	day0vsday5: DE near DB	day0vsday7: DE NOT near DB	day0vsday7: DE near DB	day0vsday80: DE NOT near DB	day0vsday80: DE near DB	day15vsday80: DE NOT near DB	day15vsday80: DE near DB	day2vsday15: DE NOT near DB	day2vsday15: DE near DB	day2vsday5: DE NOT near DB	day2vsday5: DE near DB	day2vsday7: DE NOT near DB	day2vsday7: DE near DB	day2vsday80: DE NOT near DB	day2vsday80: DE near DB	day5vsday15: DE NOT near DB	day5vsday15: DE near DB	day5vsday7: DE NOT near DB	day5vsday80: DE NOT near DB	day5vsday80: DE near DB	day7vsday15: DE NOT near DB	day7vsday80: DE NOT near DB	day7vsday80: DE near DB
DNA metabolic process																										14.3
DNA packaging																										11.7
DNA replication		13.8						13						18.6				17.5			16.9
DNA strand elongation								11.7						13.3
DNA strand elongation involved in DNA replication								12.6						12.6
M phase														12.1							15.2	13.2				19.1
M phase of mitotic cell cycle		12.5					12.9							14.3							14.4	14.2				18.2
RNA catabolic process	11.9																				18.4
SRP-dependent cotranslational protein targeting to membrane																					29.2			12.9
actin filament-based process																12.2									13.6
actomyosin structure organization								12.4								11.7
adult heart development		14
anatomical structure development		13	31.6	23.3	15.5	22.7		24		13.1	17.9	14.6		24.3	51.9	21.3	18.2	21.9		23.6				14.6	17.7		24.5	30.7
anatomical structure formation involved in morphogenesis		13.8		21.5		15.6		19.8						11.8	19.1	11.7		12.9		16.2							18.2
anatomical structure morphogenesis		15.1	29.2	23	12.3	20.5		25.2				14.6		27.1	44.6	15.9	12.6	21.9		25.5		12.8			16.9		21.9	15.9
angiogenesis															12
axon guidance								11.9
biological adhesion				21.8											18
biological regulation																											15.2
biosynthetic process		13.2
blood circulation																							12
blood coagulation																				11.8							17.9
blood vessel development						12.3									21.1												17.1
blood vessel morphogenesis															14.3												11.8
brain development			13
cardiac cell differentiation						12.3		13.7
cardiac chamber development		11.7
cardiac chamber morphogenesis																12.2
cardiac muscle tissue development		17.1				13.2		21.3						13		15.9		11.7
cardiac muscle tissue morphogenesis		14.9						14.4						12.8
cardiac ventricle development		12.6														13.2				13.7
cardiac ventricle morphogenesis		13.4						11.8								16.4				11.7
cardiovascular system development		27.6		15.5		22.1		24.2		12.8	15.2			22	26.7	15.8		15.7		18.2					13		24.1
cell adhesion				21.8											18
cell communication			25		16.9						12.4				22												14.3	12.6
cell cycle	11.7	19						14.9						17.5				13.8			21.1					19.1
cell cycle phase	11.8	17.4						13						16.5				12.6			21.1	14				19.1
cell cycle process		19.7						14.8						14.9				13.8			15.7	14.2				15.4
cell development			13.8	12.4		16.6		16.3				12.8		18.6	17.5	12.8		11.9		16.9		12.6			20.7		14.1	14.7
cell differentiation			23.7	14		13.6		19.9			12.6	13.6		13.8	26.8	15.1		14.7		15.2					13.1			18.3
cell division							13.4						11.7				14				20.5					16
cell migration															18.7
cell morphogenesis			13.3					14.9						15	13.4					12.9
cell morphogenesis involved in differentiation			13.9					12.1				12.8		13.5	15.4													11.9
cell motility															18
cell surface receptor signaling pathway			13.9												15.8
cell-cell signaling															13.4
cellular biosynthetic process		13.4
cellular component assembly														12
cellular component biogenesis										15.9										16
cellular component biogenesis at cellular level										13.1
cellular component disassembly	12.4																				22.7	13.9
cellular component disassembly at cellular level	12.6																				22.9	13.9
cellular component morphogenesis			14.3					20.5						16.3	12.1					15.3
cellular component movement															18.2													11.9
cellular component organization	19	20.9					13.7	21.6	18.5	21.5			15.1	39.6				19.9		29.9	12.8	27		12.8	26.4			12.6
cellular component organization at cellular level	18.7	13.8						15.3	17.9	17.1			14.8	29.4				13.4		19		25.1		11.7	18.7
cellular component organization or biogenesis	19.3	20.9			13.8		17.4	21.6	20.1	24.5			14.1	38.1				20.1		32.3		24.6			25.6
cellular component organization or biogenesis at cellular level	19.3	13.9					13.4	15.7	20.1	21.5			13.7	28.4				14.1		22.2		23			18
cellular developmental process			24.7	13.4		16.2		21.3				12.2		14.6	25.3	14		13.8		16.1					12.8			15.7
cellular macromolecular complex disassembly	14.2																				34.4	16.6		16.9
cellular macromolecular complex subunit organization																						15.5
cellular macromolecule metabolic process		11.7							12.9
cellular metabolic process	12.3	12.7							16.6
cellular nitrogen compound metabolic process		14.1
cellular process	29.1	22.8			25.8	13.7	35	19.8	23.4	30.8			20.6	21			20.8		16.3	29.9	14.5	13.8		22.5	14.8		17.2
cellular process involved in reproduction																					12.6
cellular protein complex disassembly	18.2												12.1								37.6	14.5		18.5
cellular response to chemical stimulus															14.9
cellular response to stimulus			15.9		11.8										14.2													13
central nervous system development			17.6																									11.9
chordate embryonic development								14.4
circulatory system development		27.6		15.5		22.1		24.2		12.8	15.2			22	26.7	15.8		15.7		18.2					13		24.1
circulatory system process																							12
coagulation																				11.8							17.9
collagen fibril organization															14
cotranslational protein targeting to membrane																					29			12.8
cytoskeleton organization														13.7
developmental process			28.7	21		21.8		21.3			13.8			18.5	51.3	17.9	14.2	20.8		18.3				12.4	14		20.1	27
embryo development						12.3										12.8
embryo development ending in birth or egg hatching								14.4
embryonic morphogenesis		12.7
enzyme linked receptor protein signaling pathway			13.6																	11.7
establishment of protein localization in endoplasmic reticulum																					29			12.8
establishment of protein localization to organelle																					12.1
extracellular matrix organization															12.3
extracellular structure organization															12.1
eye development															12.1
forebrain development																												14.4
generation of neurons			22.6					12.5				13.1		19.4	21.3			12		13					13.9			17.3
heart development		32.5		11.7		18.6		24.9						27.2	12.1	18.8		14.2		22.2							18.2
heart morphogenesis		20				15.1		19.7						13.9		15.9				11.7
hemostasis																											18.6
interphase		12.7
interphase of mitotic cell cycle		12.7
localization											14.7									13.6				12.7
localization of cell															18
locomotion			13.6												18.7												14.1
mRNA catabolic process	15.3																				20.1
mRNA metabolic process	18.7								17.2
macromolecular complex disassembly	13.9																				34.1	16.5		16.6
macromolecular complex subunit organization	11.7	11.8								13.9				14.6						12.5	12.4	16.6			15.1
mitosis		12					13.1							14.3							14.4	14				18
mitotic cell cycle	12	22.8					12.4	14.1						19.1				13.4			22.9	14.8				19.4
multicellular organismal development		12.6	31.7	23.7	13.8	20.8		22.7			16.6	12.8		21	53.2	22.1	14	21.2		18.9				14	15.3		23.8	30.7
multicellular organismal process			35.5	23.7	11.8	16.6		17.5			19.4	15.7		16.9	51.7	24.8	18.2	21.1		15.6					16.3		25.4	28.8
muscle cell development								11.6																	11.6
muscle cell differentiation						14.1		13.2								13.6									13.6
muscle contraction								11.8								12.5							18.1
muscle organ development						12.3		14.5						11.7		15.9		12.8									13.6
muscle organ morphogenesis		13.8												12.4
muscle structure development		15.1				18.8		18.9						12.4		19.1		14		13.4			13.3		18.4		16.5
muscle system process								12.3		12.3						13.1							16.5
muscle tissue development		13.1				20.3		18.3								15.9
muscle tissue morphogenesis		13.9						12.2						12.2
myofibril assembly								14.4								15
negative regulation of biological process		13.3	17.1		11.5			11.9			12				18.5												20.9
negative regulation of cell communication															13
negative regulation of cellular macromolecule biosynthetic process		13.4
negative regulation of cellular metabolic process		12.4
negative regulation of cellular process	11.7	13.9	15.2		11.9			13							17.6												17.2
negative regulation of gene expression		12.6
negative regulation of macromolecule biosynthetic process		13.2
negative regulation of macromolecule metabolic process		13.8
negative regulation of metabolic process		13
negative regulation of nitrogen compound metabolic process		12
negative regulation of nucleobase-containing compound metabolic process		12.4
negative regulation of response to stimulus															16.1
negative regulation of signal transduction															13
negative regulation of signaling															12.3
negative regulation of transcription from RNA polymerase II promoter		13.9
negative regulation of transcription, DNA-dependent		12.6
nervous system development			37.3			13.6		17.8		12.7	12	14.6		21.8	31.1	15		17		17.3					17.9		14.7	29
neurogenesis			26					14.4				14.6		18.4	24.1			12.5		14.7					14.1			18.5
neuron development			12.2												12													11.5
neuron differentiation			17.9									13.6		14.1	16.7										13.3			13.6
neuron projection development			12.6
nitrogen compound metabolic process		14
nuclear division		12					13.1							14.3							14.4	14				18
nuclear-transcribed mRNA catabolic process	15.9																				20.9
nuclear-transcribed mRNA catabolic process, nonsense-mediated decay	16.3												11.7								26.8			13.7
nucleobase-containing compound metabolic process		13.5
organ development		11.9	17.5	20.7		16.1		16.3			15.9			14.7	34	13.3		16.1		19							16.2	17.2
organ morphogenesis		13.9	12.4	13.5		11.6		11.8						16.7	14.7	11.6		14.7		11.8
organelle fission		12					13.4							13.4							12.6	14.4				17
organelle organization									13					16.4								15.2
phosphate-containing compound metabolic process																			12.8					17.6			12
phosphorus metabolic process																			12.8					17.6			12
phosphorylation																								15.1
positive regulation of RNA metabolic process																				11.6
positive regulation of biological process															13.2					12.5							11.6
positive regulation of catalytic activity																				11.8
positive regulation of cell communication															12.7
positive regulation of cell differentiation																12.1
positive regulation of cellular metabolic process																				14.2
positive regulation of cellular process			12.4		12.3			15.4							18					18.8					12.8		12.9	11.7
positive regulation of developmental process				13.7		13.4		14.4			17.3				13.5	13.8											14.9
positive regulation of gene expression		13.2																		12.6
positive regulation of macromolecule biosynthetic process																				11.7
positive regulation of macromolecule metabolic process																				16.6
positive regulation of metabolic process																				14.7
positive regulation of molecular function								14.4												15.7
positive regulation of nitrogen compound metabolic process																				12
positive regulation of nucleobase-containing compound metabolic process																				13
positive regulation of signal transduction															13
positive regulation of signaling															13.3
positive regulation of transcription, DNA-dependent		11.7																		12.1
protein complex disassembly	17.8												11.9								37.2	14.4		18.2
protein complex subunit organization	11.6													11.7							15.8	12.8			12.1
protein localization in endoplasmic reticulum																					25.7
protein targeting to ER																					29			12.8
protein targeting to membrane																					19.1
protein-DNA complex subunit organization																						11.9
regulation of anatomical structure morphogenesis			15.2	11.7											20.7
regulation of biological quality						12.3		11.9			13.8			20.7	15.4	12.6		12.5		15.9							21.6
regulation of body fluid levels																											19.6
regulation of canonical Wnt receptor signaling pathway															13.2
regulation of catalytic activity		13.6						13.7		13.9
regulation of cell adhesion															13.2
regulation of cell communication			16.7					13.1							22.7					11.8							13.2	14.6
regulation of cell cycle		12.1						12.8
regulation of cell death								12.4
regulation of cell development								15.8							18.8
regulation of cell differentiation			13.1	14.5				11.5			15.2				13.7	11.6											14.5
regulation of cell morphogenesis involved in differentiation															13.1
regulation of cell proliferation															17.5
regulation of cellular component organization								14.5		13.1				13.6				13.4		13					14.9		13.3
regulation of cellular macromolecule biosynthetic process		12
regulation of cellular metabolic process		13.8
regulation of cellular process			11.5		13.6															11.8							13.2	13.3
regulation of developmental process			17.3	20.1				12.9			22.3	11.6			17.1	11.7									11.6		22.8
regulation of epithelial cell proliferation															12.5
regulation of heart contraction																18.8
regulation of localization				12.1				14.3							13.2
regulation of locomotion				11.6
regulation of macromolecule biosynthetic process		11.7
regulation of macromolecule metabolic process		13.9
regulation of metabolic process		15.2
regulation of molecular function		19.5						21.6		21.9										15.5
regulation of multicellular organismal development			16.3	13.7				14.6			17.9				20.5												16.6
regulation of multicellular organismal process			14.6	15.1		15.2		19.6			22.7				21.7	19				14.3							24.5
regulation of muscle organ development								14.4
regulation of nervous system development															11.5
regulation of neurogenesis															11.8
regulation of neuron differentiation															12.1
regulation of phosphorylation																				11.8								12
regulation of primary metabolic process		13.2
regulation of protein phosphorylation																				11.8
regulation of response to stimulus			12.4												12
regulation of response to stress																											11.6
regulation of signal transduction			19.1								11.5	14.6			18					14.4					13.1		16	14.6
regulation of signaling			24.2		11.5					13.9	12.6	14.6			20.8					19.3					14.8		17.8	18.6
regulation of striated muscle tissue development								14.8
regulation of system process								14.8		11.8						13.9
regulation of transcription from RNA polymerase II promoter		15.6																		13
regulation of transport										13.1
regulation of wound healing																											13.1
response to chemical stimulus			11.6								12.4				22												14.3
response to endogenous stimulus											16.5				12.7
response to organic substance											12.1				14.7
response to steroid hormone stimulus															11.8
response to stimulus															11.9													12.6
response to wounding																											14.5
ribonucleoprotein complex biogenesis										12.1
sensory organ development															12.3
signal transduction			17.6									11.7			13.2													12
signaling			25.6		17.6							12.3			21.6												14	13.8
sister chromatid segregation																										11.9
striated muscle cell development								13								13
striated muscle cell differentiation						12.5		13															11.6
striated muscle tissue development		12.5				18.6		18								17.2
system development		14.3	35.5	24.9	17.2	22.1		24.9		14.7	22.7	15.7	11.7	26.5	57.4	20.7	20	21.9	12.8	23.6				16.9	17.8		25.4	38
tissue development				16.7		12.9									16.3	13.1
tissue morphogenesis		13.2																12.5		13.5
translational elongation	15												11.7								35.2			14.6
translational initiation	12.9																				25.4			11.8
translational termination	18.2												14.7								38.3	13.7		18.9
tube development																				16.2
tube morphogenesis																											11.5
vasculature development															22												17
ventricular cardiac muscle tissue development		11.9
viral genome expression	17.7												14.8								37.9	13.9		19.2
viral infectious cycle	13.4																				28.6			12.3
viral reproduction	12.4
viral reproductive process	13.9																				22.9			13.1
viral transcription	17.7												14.8								37.9	13.9		19.2
wound healing																									11.6		21.9
