# Supplementary material for: Examining the dynamics of three-dimensional genome organization with multitask matrix factorization
Source: HighWire-hosted journal article supplement (doi:10.1101/gr.279930.124), 2025-03-20
Supplement: Supplemental_Figures.zip [file Supplemental_Fig_S2.pdf › supp fig/Supplemental_Fig_S2.pdf]

**Figure S2**

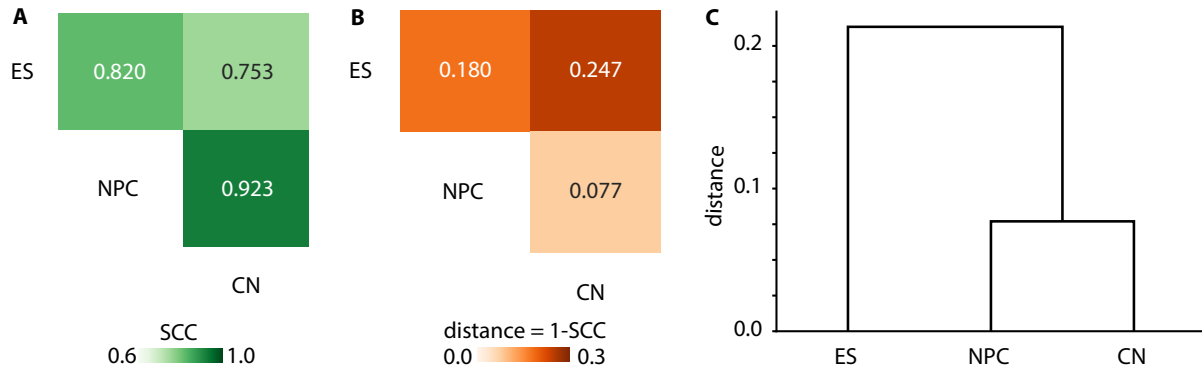

**Figure S2.** Inferring a tree structure between input conditions based on the similarity of the input matrices. Here we use mouse chr19 intra-chromosomal matrices (25kb resolution) from neural differentiation data with 3 timepoints (ES, NPC, CN) as an example. **(A)** Similarity between input matrices for each pair of timepoints, measured by stratum-adjusted correlation coefficient (SCC). **(B)** Similarity converted to distance =  $1 - \text{SCC}$ . **(C)** Dendrogram of hierarchy constructed using the distance and average linkage.
