# Supplementary material for: Examining the dynamics of three-dimensional genome organization with multitask matrix factorization
Source: HighWire-hosted journal article supplement (doi:10.1101/gr.279930.124), 2025-03-20
Supplement: Supplemental_Figures.zip [file Supplemental_Fig_S3.pdf › supp fig/Supplemental_Fig_S3.pdf]

Figure S3

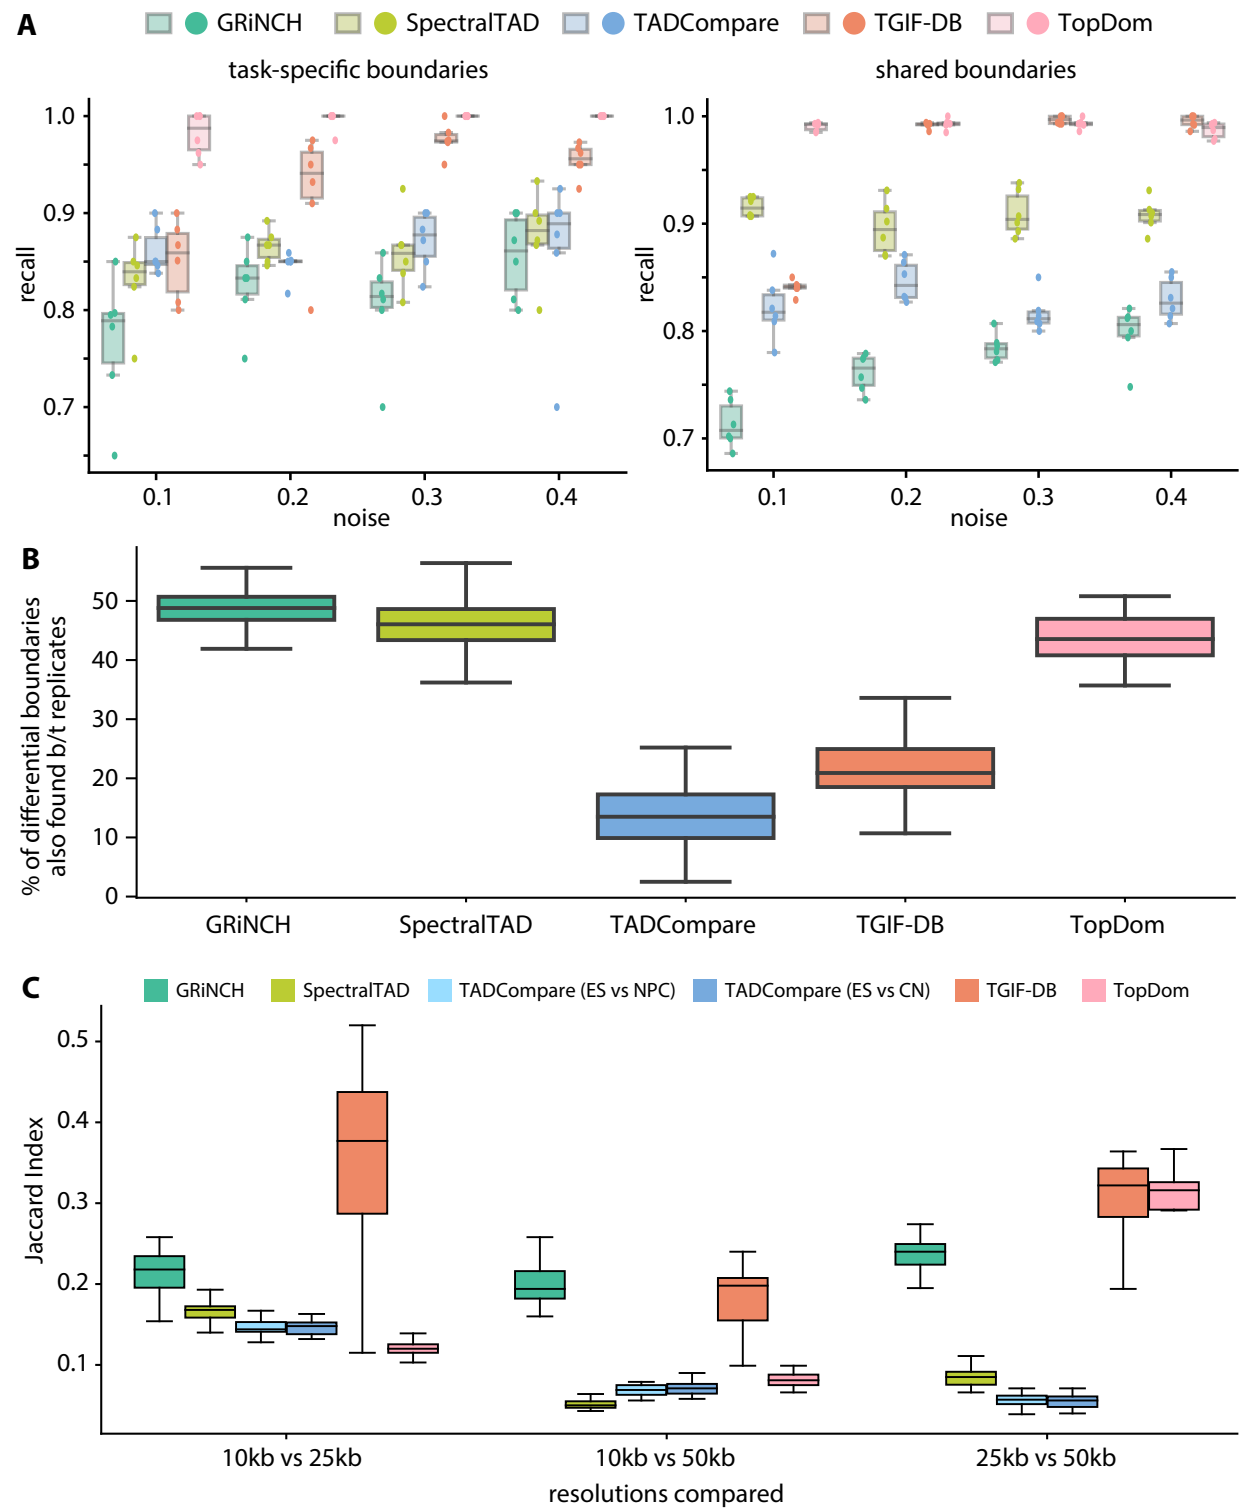

**Figure S3.** Benchmarking TGIF-DB. **(A)** Recall on simulated data. **(B)** Percentage of differential boundaries between day 0 and day 2 of cardiomyocyte differentiation overlapping with (false-positive) differential boundaries found between two biological replicates within single timepoint. **(C)** Similarity of boundary sets from input data of different resolutions (10kb, 25kb, and 50kb).
