# Supplementary material for: Examining the dynamics of three-dimensional genome organization with multitask matrix factorization
Source: HighWire-hosted journal article supplement (doi:10.1101/gr.279930.124), 2025-03-20
Supplement: Supplemental_Figures.zip [file Supplemental_Fig_S4.pdf › supp fig/Supplemental_Fig_S4.pdf]

Figure S4

| dataset                                                     | inputs/timepoints                                                                                                                                                            | tree structure                                                                       | used in analysis                                                                                                                                                        |
|-------------------------------------------------------------|------------------------------------------------------------------------------------------------------------------------------------------------------------------------------|--------------------------------------------------------------------------------------|-------------------------------------------------------------------------------------------------------------------------------------------------------------------------|
| H1-endoderm<br>(Reiff et al., 2022,<br>Dekker et al., 2023) | H1 (hESC),<br>definitive endoderm<br>differentiated from H1                                                                                                                  | 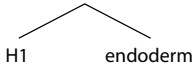    | benchmarking: compartment<br>-calling & differential compar-<br>tment methods, DE analysis                                                                              |
| mouse neural<br>differentiation<br>(Bonev et al., 2017)     | ES (mESC),<br>NPC (neural progenitors),<br>CN (cortical neurons)                                                                                                             |     | benchmarking: TAD stability<br>to resolution, compartment<br>histone mark charaterization,<br>DE analysis<br><br>benchmarking: TAD stability<br>to normalization method |
| cardiomyocyte<br>differentiation<br>(Zhang et al., 2019)    | day 0 (hESC),<br>day 2 (mesoderm),<br>day 5 (cardiac mesoderm),<br>day 7 (cardiac progenitors),<br>day 15 (primitive cardiomyocytes),<br>day 80 (ventricular cardiomyocytes) |    | benchmarking: CTCF enrich-<br>ment in TAD bondaries, DE<br>analysis, SNP analysis<br><br>benchmarking: TAD stability<br>across biological replicates                    |
| GM12878<br>cell line<br>(Rao et al.,2014)                   | GM12878 reads subsampled to<br>5, 10, 25, 50% of original depth                                                                                                              |  | benchmarking: TAD stability<br>to read depth                                                                                                                            |

Figure S4. Overview of datasets used in benchmarking and analysis.
