# Supplementary material for: Examining the dynamics of three-dimensional genome organization with multitask matrix factorization
Source: HighWire-hosted journal article supplement (doi:10.1101/gr.279930.124), 2025-03-20
Supplement: Supplemental_Figures.zip [file Supplemental_Fig_S6.pdf › supp fig/Supplemental_Fig_S6.pdf]

**Figure S6**

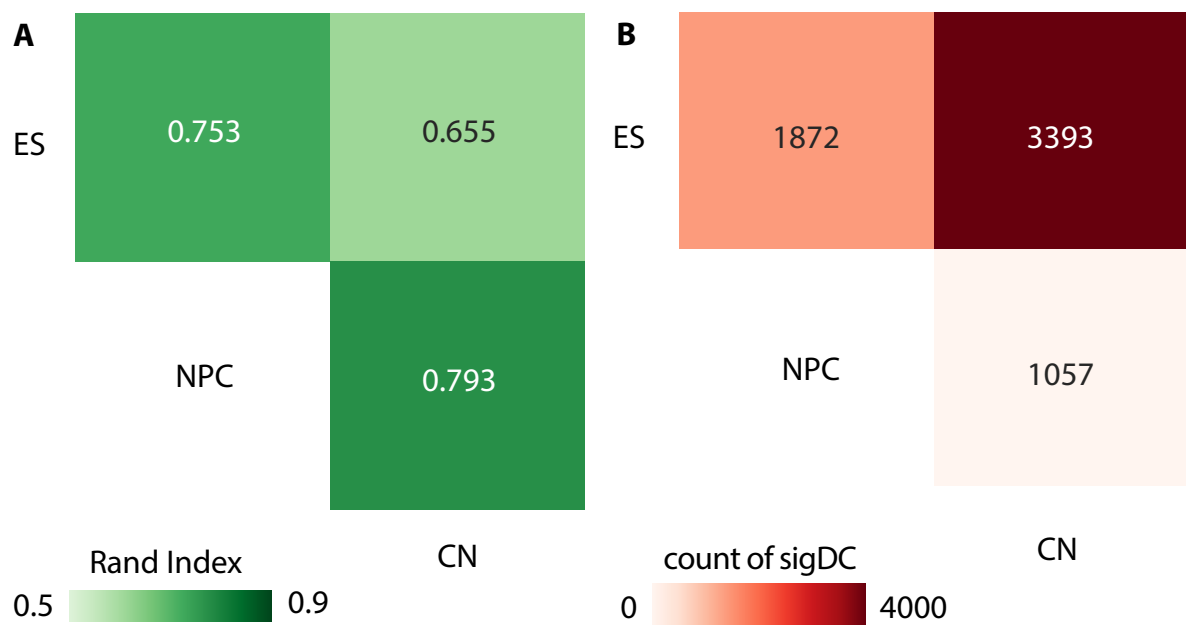

**Figure S6.** Characterizing TGIF-DC clusters and sigDC on mouse neural differentiation data. **(A)** Similarity of cluster assignments for every pair of timepoints/states measured by Rand index. **(B)** Count of significantly differential compartmental regions (sigDC) for every pair of timepoints/states.
