# Supplementary material for: Examining the dynamics of three-dimensional genome organization with multitask matrix factorization
Source: HighWire-hosted journal article supplement (doi:10.1101/gr.279930.124), 2025-03-20
Supplement: Supplemental_Figures.zip [file Supplemental_Fig_S8.pdf › supp fig/Supplemental_Fig_S8.pdf]

Figure S8

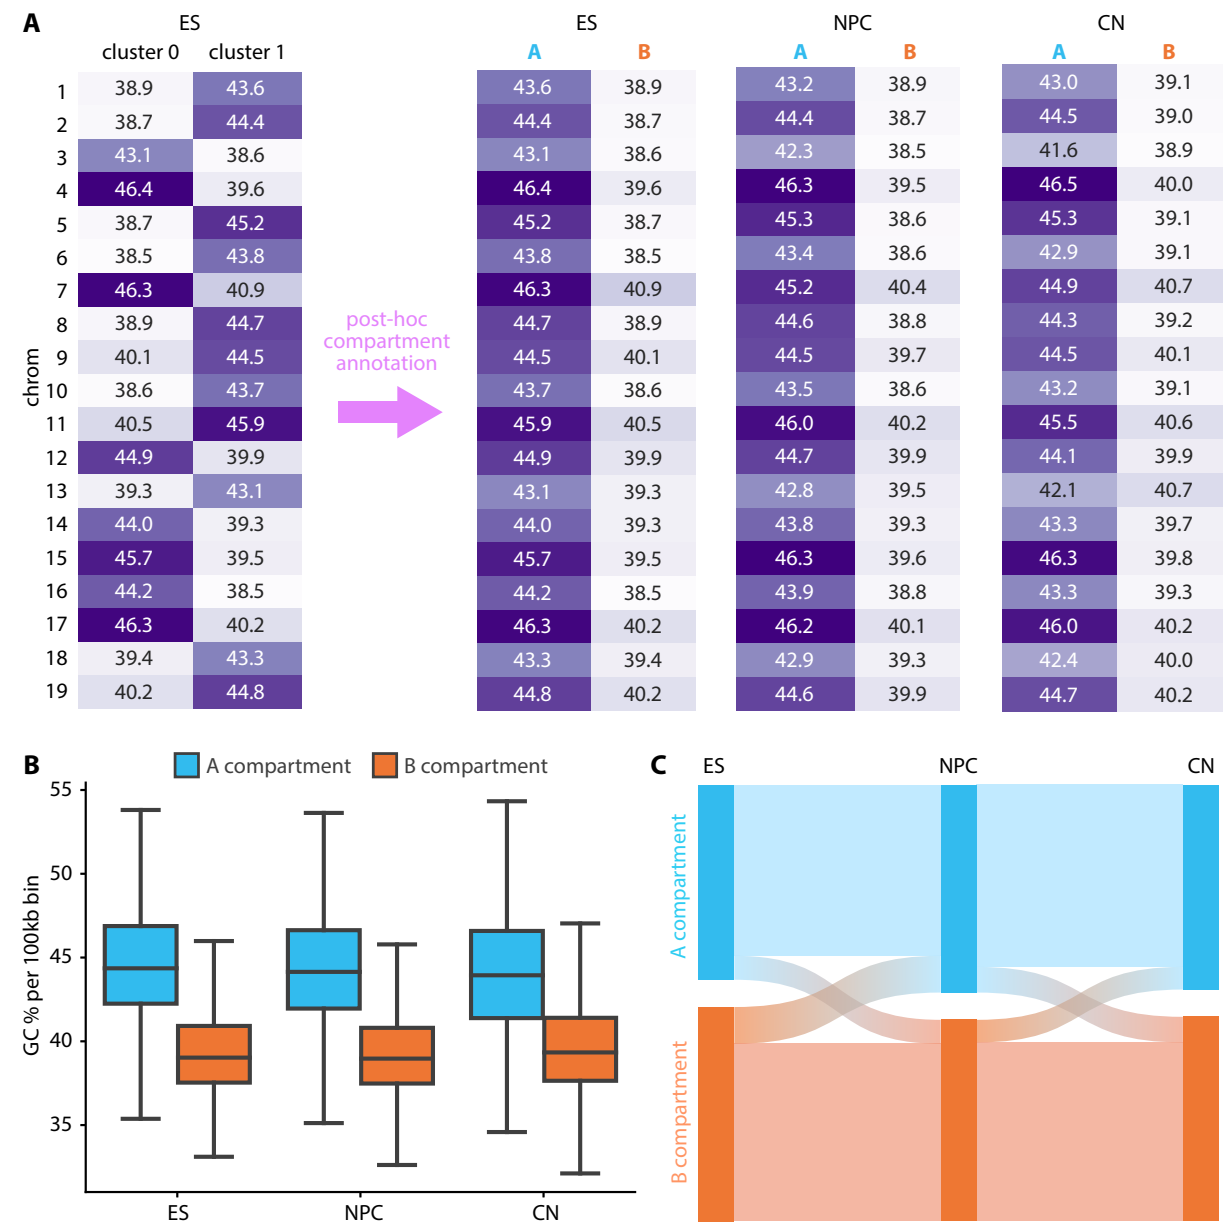

**Figure S8.** Post-hoc annotation of TGIF-DC clusters into A and B compartments in mouse neural differentiation data. **(A)** Within each chromosome, the mean GC percentage is measured for regions in each TGIF-DC cluster for ES. Cluster with higher mean GC content is assigned to compartment A; the other to compartment B across all timepoints. **(B)** Genome-wide distribution of GC percentage in each 100kb bin by compartment assignment and timepoint. **(C)** Dynamic compartment assignment patterns for all genomic regions from ES to NPC to CN state.
