# Supplementary material for: Examining the dynamics of three-dimensional genome organization with multitask matrix factorization
Source: HighWire-hosted journal article supplement (doi:10.1101/gr.279930.124), 2025-03-20
Supplement: Supplemental_Figures.zip [file Supplemental_Fig_S9.pdf › supp fig/Supplemental_Fig_S9.pdf]

Figure S9

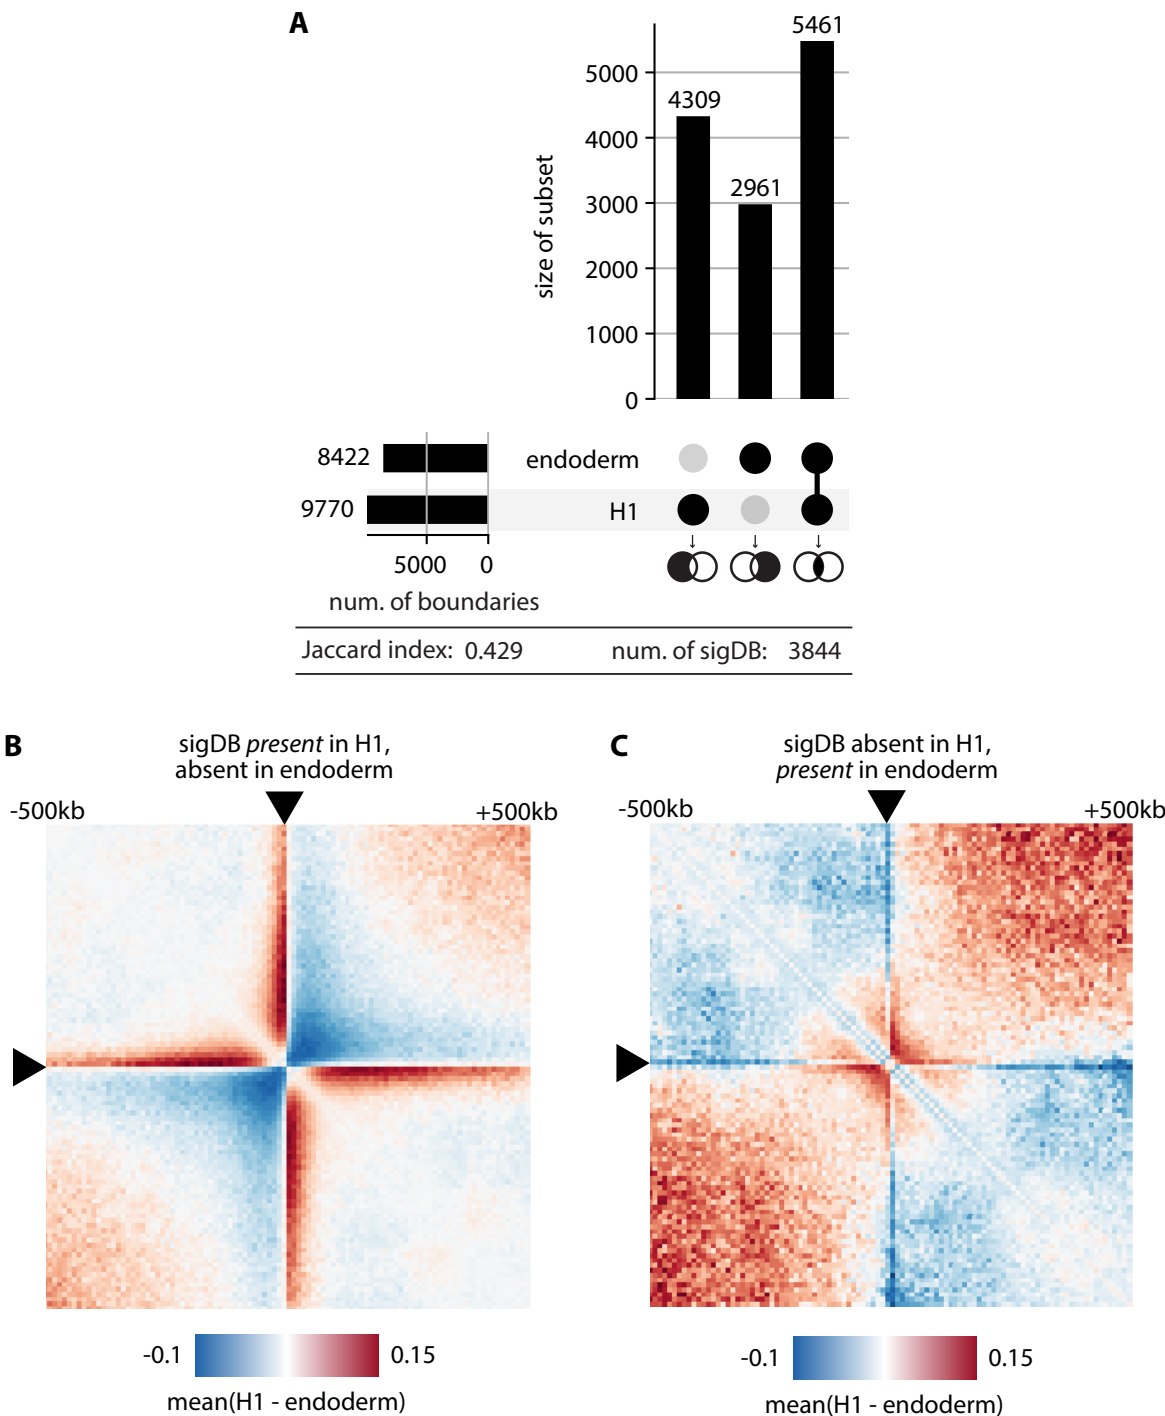

**Figure S9.** Characterizing boundaries and sigDB in H1-endoderm differentiation. **(A)** Number of significant boundaries identified by TGIF-DB in H1 and differentiated endoderm. The vertical bars represent specific subsets only belonging to each category, i.e. boundaries unique to H1; those unique to endoderm; intersection of H1 and endoderm boundaries. The horizontal bars are total counts of boundaries identified in each state. Similarity of the boundary sets between H1 and endoderm is measured by Jaccard index. **(B)** Mean interaction count difference between H1 and endoderm near sigDB regions (surrounding 1MB window), present in H1 and absent in endoderm. To offset the depth difference between H1 and endoderm, interaction counts were first normalized to O/E matrices. **(C)** Mean interaction count difference between H1 and endoderm near sigDBs absent in H1 and present in endoderm.
