# Supplementary material for: Examining the dynamics of three-dimensional genome organization with multitask matrix factorization
Source: HighWire-hosted journal article supplement (doi:10.1101/gr.279930.124), 2025-03-20
Supplement: Supplemental_Figures.zip [file Supplemental_Fig_S10.pdf › supp fig/Supplemental_Fig_S10.pdf]

Figure S10

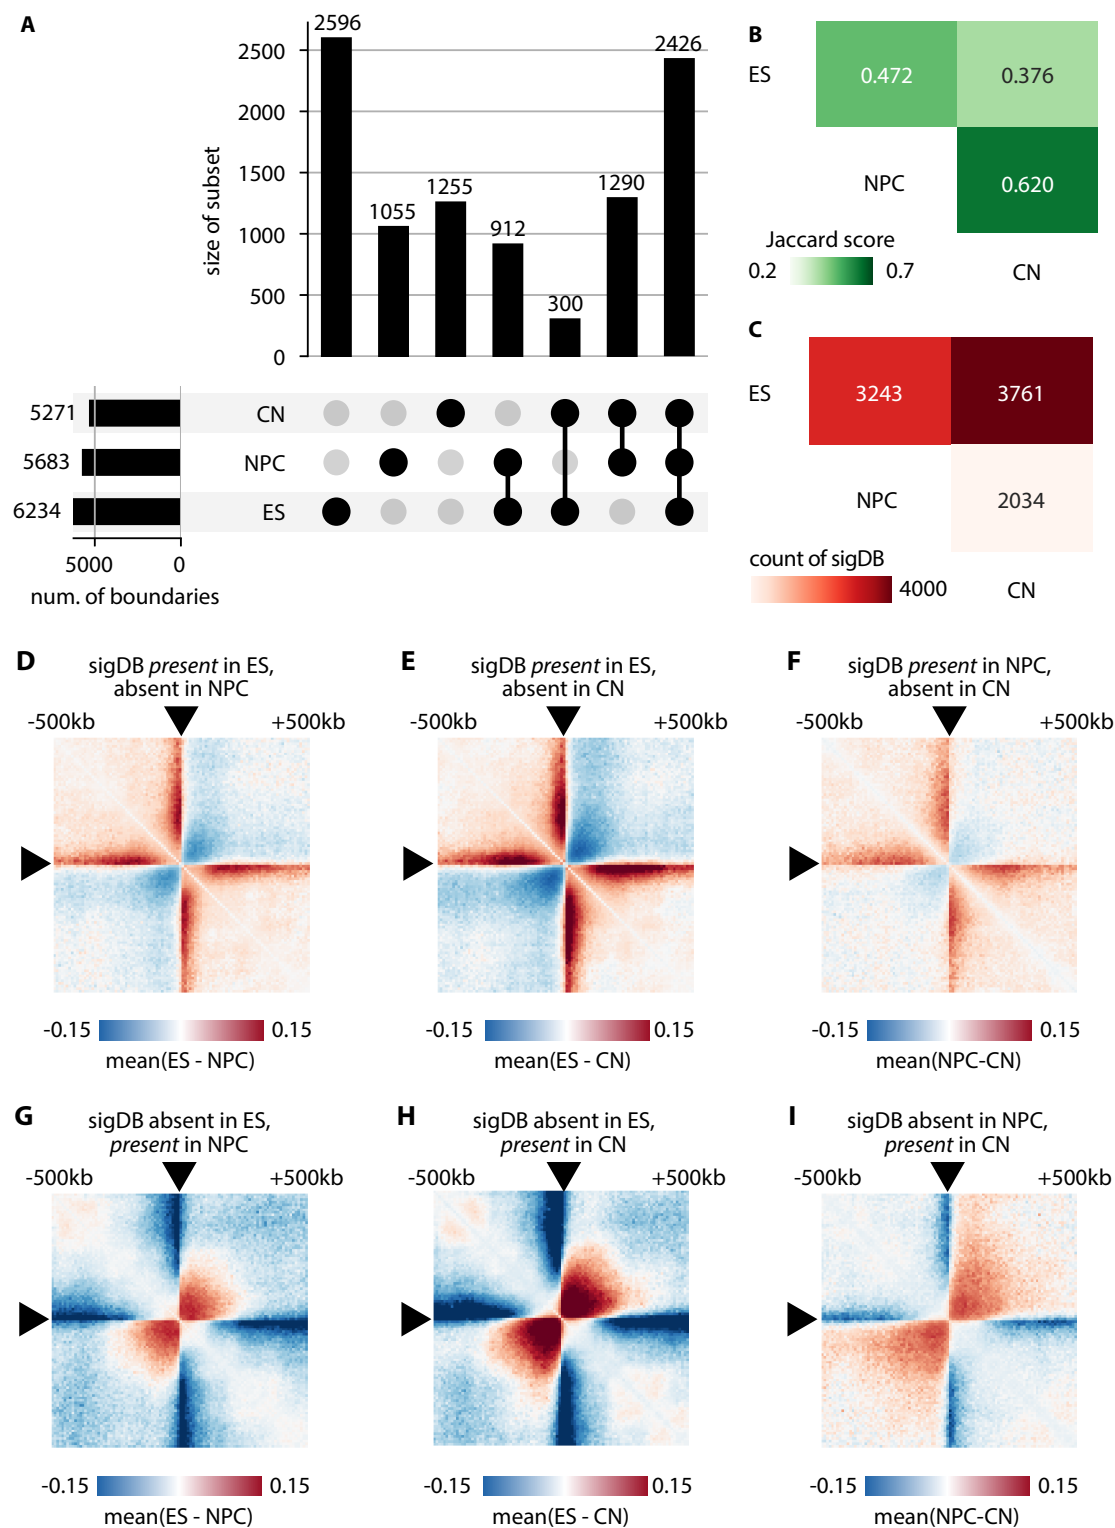

**Figure S10.** Characterizing boundaries and sigDB in mouse neural differentiation. **(A)** Number of significant boundaries. The vertical bars represent specific subsets only belonging to each category, e.g. boundaries unique to ES, NPC, CN; intersection of ES and NPC boundaries. The horizontal bars are total counts of boundaries identified in each state. **(B)** Similarity of boundary sets between pairs of timepoints/states, measured by Jaccard index. **(C)** Count of significantly *differential* boundaries between pairs of timepoints/states. **(D)** Mean interaction count difference between ES and NPC near sigDB regions (the surrounding 1MB window), present in ES and absent in NPC. To offset the depth difference between ES and NPC, interaction counts were first normalized to O/E matrices. **(E)** Same visualization as in **(D)**, but for sigDBs present in ES but absent in CN. **(F)** Same visualization as in **(D)**, but for sigDBs present in NPC but absent in CN. **(G)** Same visualization as in **(D)**, but for sigDBs absent in ES but present in NPC. **(H)** Same visualization as in **(D)**, but for sigDBs absent in ES but present in CN. **(I)** Same visualization as in **(D)**, but for sigDBs absent in NPC but present in CN.
