# Supplementary material for: Examining the dynamics of three-dimensional genome organization with multitask matrix factorization
Source: HighWire-hosted journal article supplement (doi:10.1101/gr.279930.124), 2025-03-20
Supplement: Supplemental_Figures.zip [file Supplemental_Fig_S12.pdf › supp fig/Supplemental_Fig_S12.pdf]

Figure S12

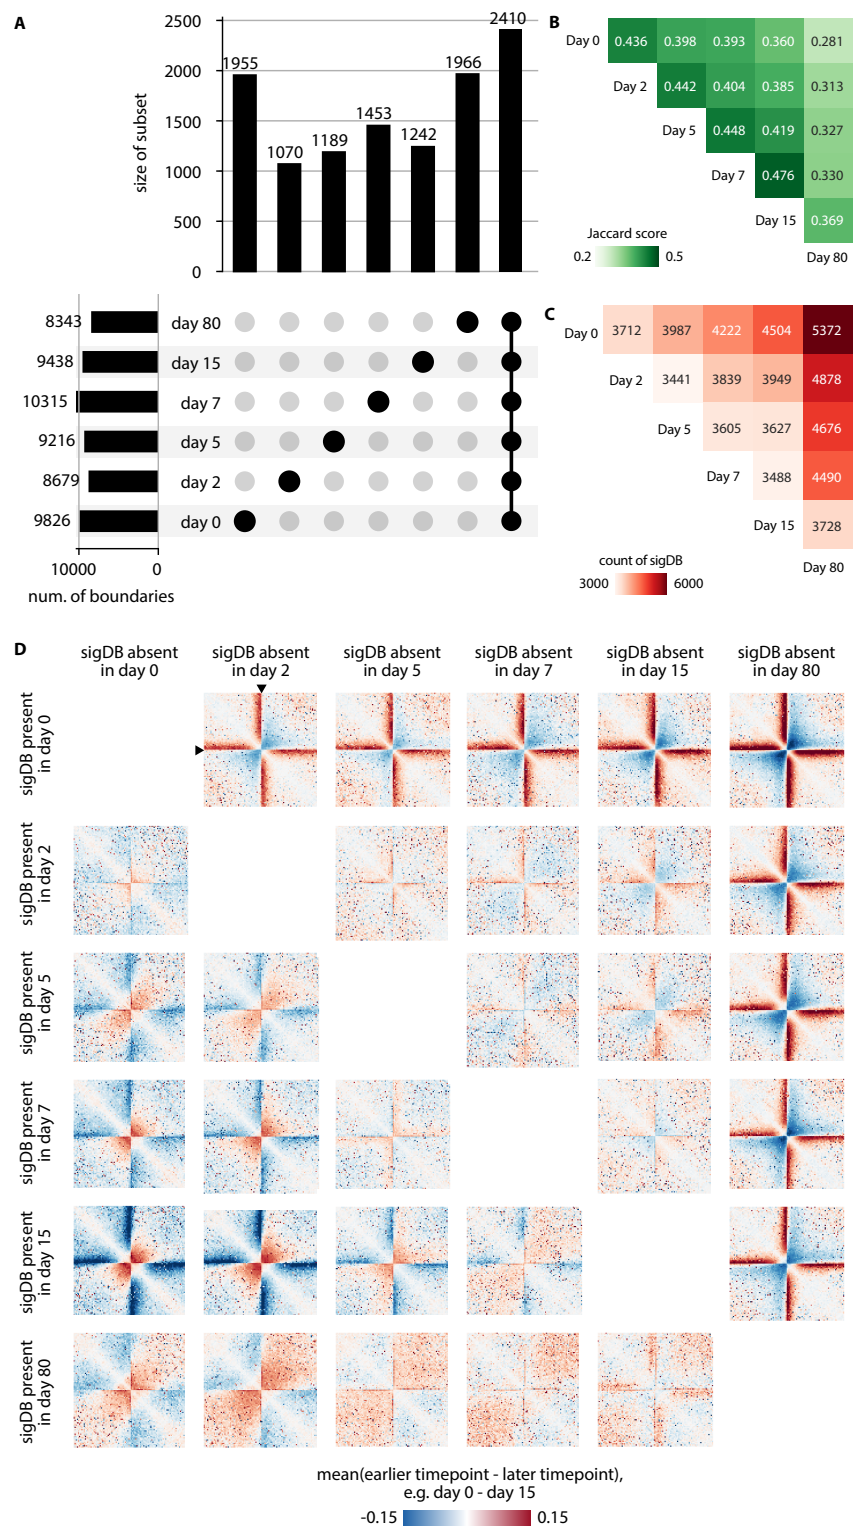

**Figure S12.** Characterizing boundaries and sigDB in cardiomyocyte differentiation. **(A)** Number of significant boundaries. The vertical bars represent specific subsets only belonging to each category, e.g. boundaries unique to day 0, day 2, etc., intersection of day 0 and 2 boundaries. etc. The horizontal bars are total counts of boundaries identified in each timepoint. **(B)** Similarity of boundary sets between pairs of timepoints/states, measured by Jaccard index. **(C)** Count of significantly *differential* boundaries between pairs of timepoints/states. **(D)** Mean interaction count difference between two timepoints near sigDB regions (the surrounding 1MB window). Each row of the grid represents the timepoint in which the boundary is present and each column the timepoint in which it is absent. To offset the depth difference between the two timepoints, interaction counts were first normalized to O/E matrices. Each heatmap is the count different matrix where the counts from the earlier timepoint is subtracted by those from the later timepoint in the pair as indicated.
