# Supplementary material for: Examining the dynamics of three-dimensional genome organization with multitask matrix factorization
Source: HighWire-hosted journal article supplement (doi:10.1101/gr.279930.124), 2025-03-20
Supplement: Supplemental_Figures.zip [file Supplemental_Fig_S13.pdf › supp fig/Supplemental_Fig_S13.pdf]

**Figure S13**

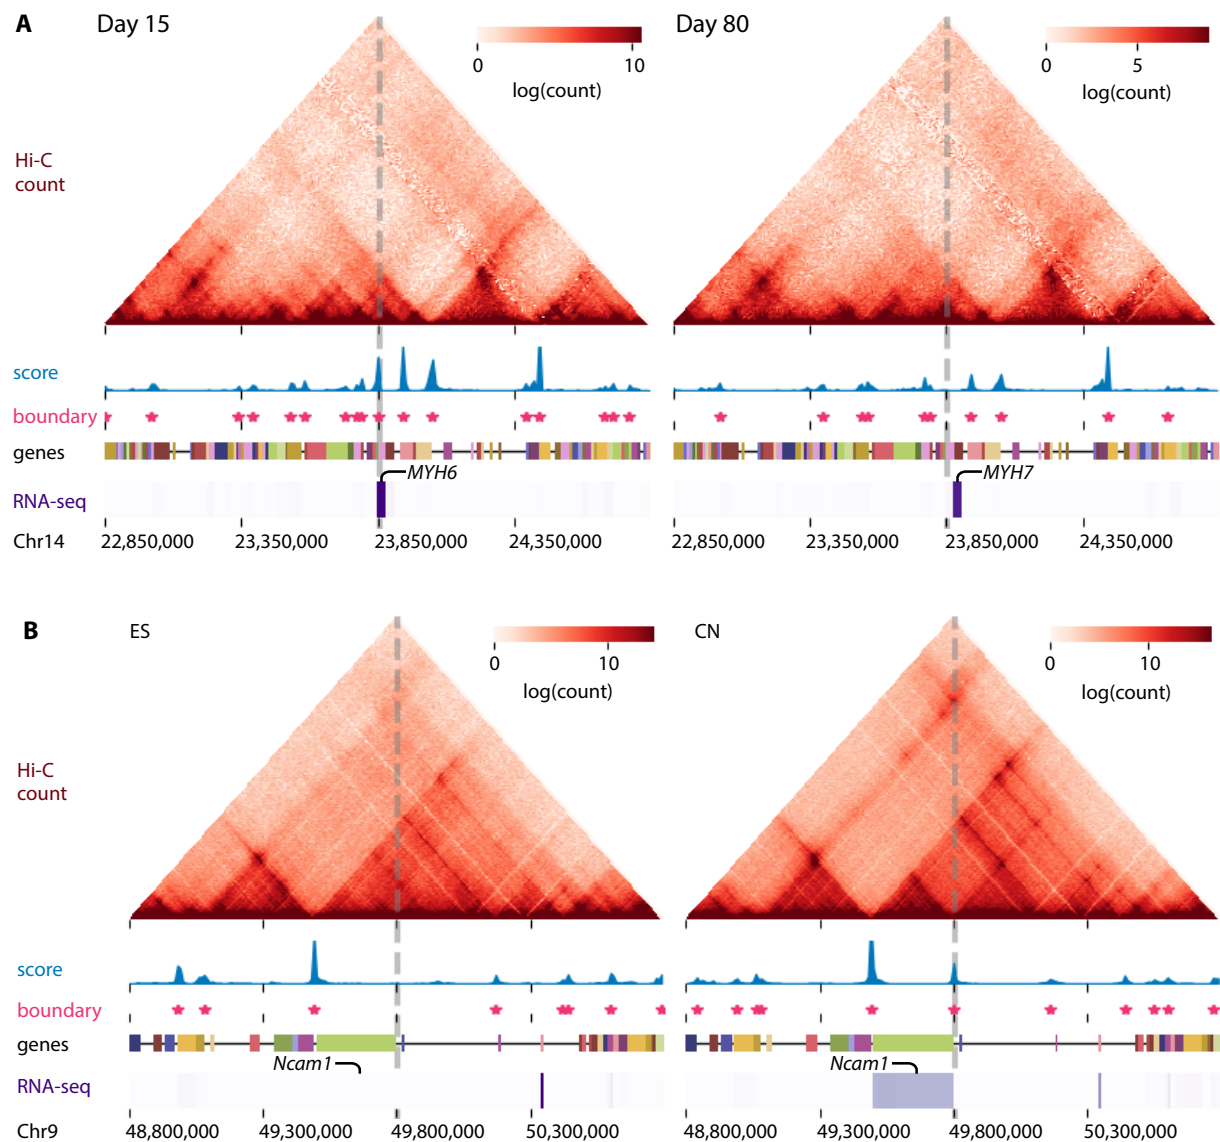

**Figure S13.** Examples of differentially expression (DE) gene near significantly differential boundary (sigDB). (A) A highly ranked sigDB (loci marked with dotted vertical line) close to a DE gene, *MYH6*. Shown are the Hi-C interaction matrices for the ES and CN stages of mouse neural differentiation, the boundary score (blue), significant boundary (asterisk), a gene track and the expression heatmap from RNA-seq data. Differential expression of *MYH6* near a sigDB present in day 15 of cardiomyocyte differentiation but absent in day 80 is shown. (B) A sigDB close to a DE gene, *Ncam1*. Differential expression of *Ncam1* near the sigDB that is absent in ES state but appears in CN is shown.
