# Supplementary material for: Examining the dynamics of three-dimensional genome organization with multitask matrix factorization
Source: HighWire-hosted journal article supplement (doi:10.1101/gr.279930.124), 2025-03-20
Supplement: Supplemental_Figures.zip [file Supplemental_Fig_S14.pdf › supp fig/Supplemental_Fig_S14.pdf]

**Figure S14**

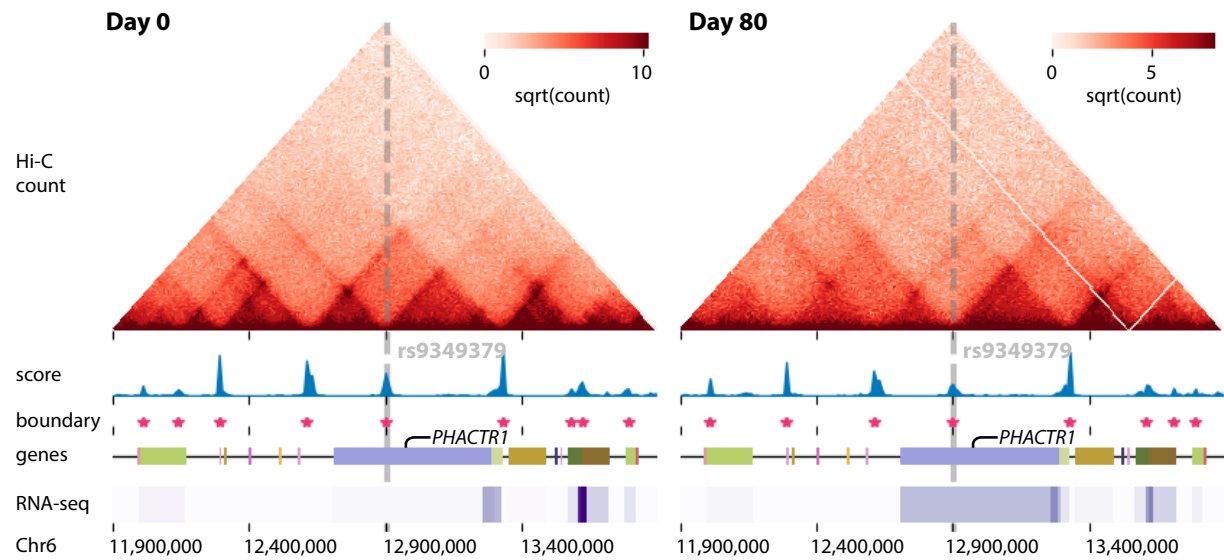

**Figure S14.** Persistent TGIF boundaries identified from human cardiomyocyte differentiation containing the cardiovascular disease associated GWAS SNP rs9349379.
