# Supplementary material for: Examining the dynamics of three-dimensional genome organization with multitask matrix factorization
Source: HighWire-hosted journal article supplement (doi:10.1101/gr.279930.124), 2025-03-20
Supplement: Supplemental_Figures.zip [file Supplemental_Fig_S15.pdf › supp fig/Supplemental_Fig_S15.pdf]

Figure S15

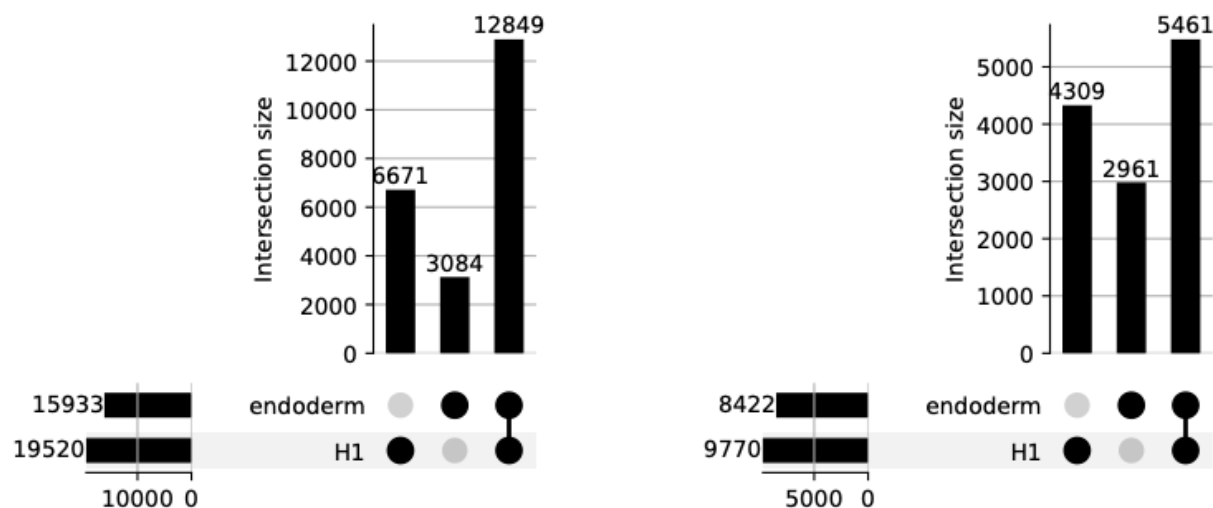

**Figure S15.** Left shows the number of unique and shared boundaries for both summit and non-summit boundaries. The right shows the same statistics for summit boundaries only.
