# Supplementary material for: Examining the dynamics of three-dimensional genome organization with multitask matrix factorization
Source: HighWire-hosted journal article supplement (doi:10.1101/gr.279930.124), 2025-03-20
Supplement: Supplemental_Figures.zip [file Supplemental_Fig_S16.pdf › supp fig/Supplemental_Fig_S16.pdf]

**Figure S16**

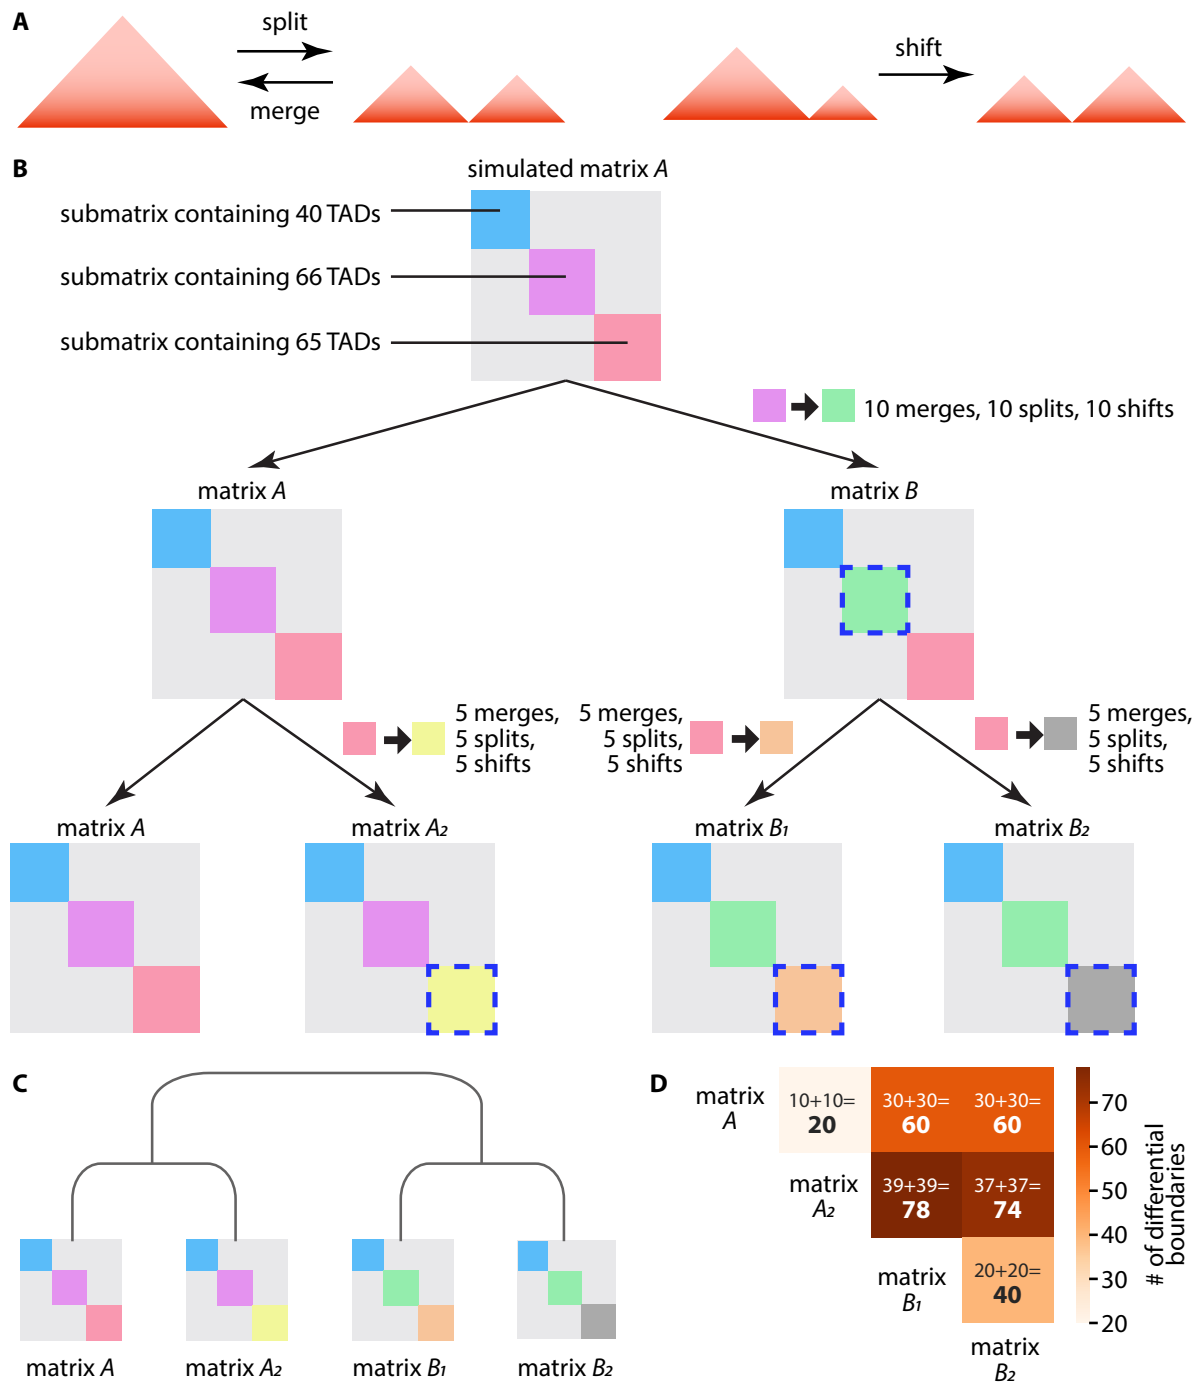

**Figure S16.** TAD boundary perturbation procedure for Hi-C data simulation. **A.** Three different types of TAD boundary changes used in simulation: TAD split, merge, and shift. **B.** Different sets of TADs were

split, merged, or shifted within the original simulated TAD set to yield four different simulated matrices. **C.** Tree structure input to TGIF for its application to the simulated matrices. **D.** Number of different TADs between pairs of simulated matrices.
