# Supplementary material for: Examining the dynamics of three-dimensional genome organization with multitask matrix factorization
Source: HighWire-hosted journal article supplement (doi:10.1101/gr.279930.124), 2025-03-20
Supplement: Supplemental_Figures.zip [file Supplemental_Fig_S17.pdf › supp fig/Supplemental_Fig_S17.pdf]

**Figure S17**

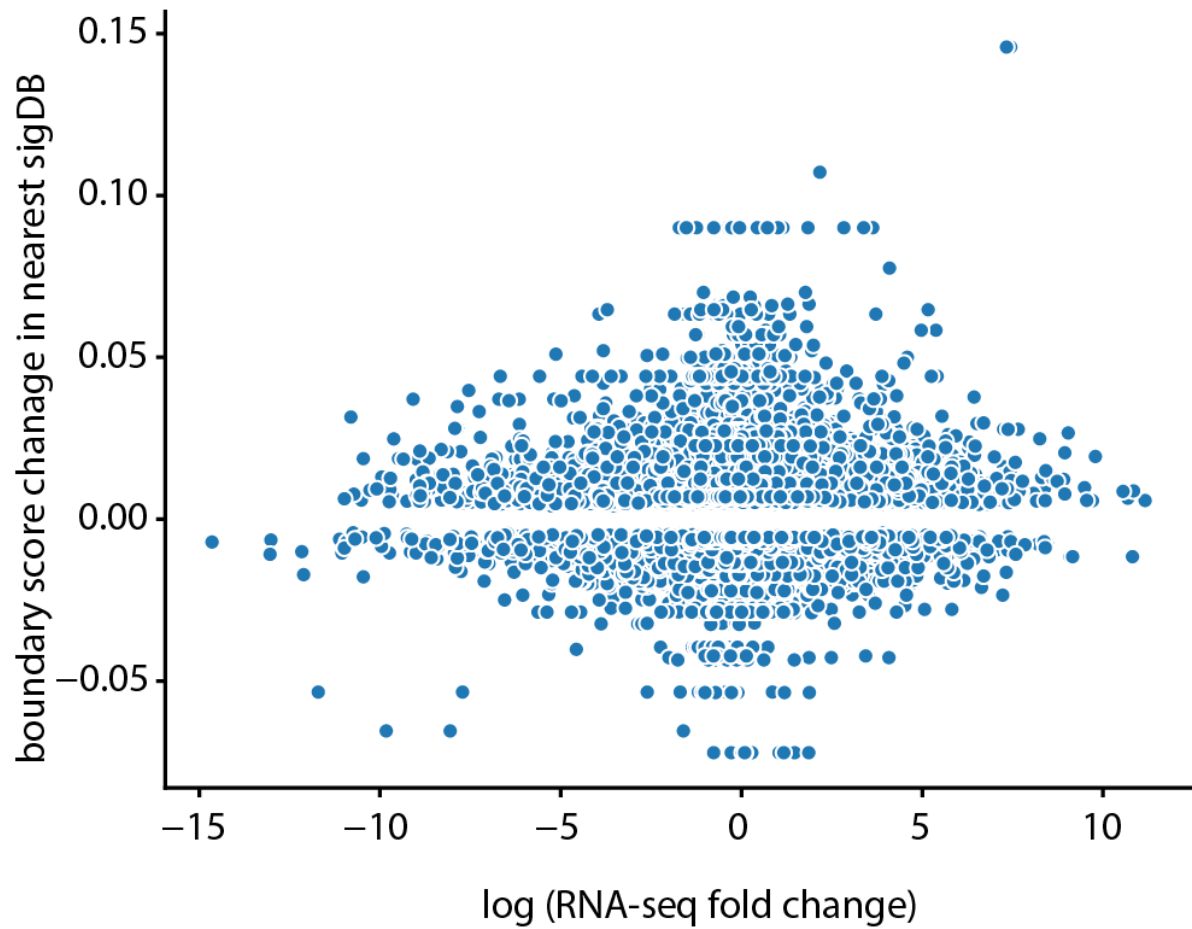

**Figure S17.** Change in gene expression vs boundary score change in the nearest significant differential boundary (sigDB) for the H1-endoderm differentiation dataset. For each gene, shown is the log fold change in the expression level (TPM) of a gene between H1 and endoderm (H1/endoderm) against the change in boundary score of its nearest sigDB (H1-endoderm). Overall, there is no correlation between the change in expression and change in boundary score (Pearson's  $R = 0.03$ ).
