# Supplementary material for: Examining the dynamics of three-dimensional genome organization with multitask matrix factorization
Source: HighWire-hosted journal article supplement (doi:10.1101/gr.279930.124), 2025-03-20
Supplement: Supplemental_Figures.zip [file Supplemental_Fig_S18.pdf › supp fig/Supplemental_Fig_S18.pdf]

Figure S18

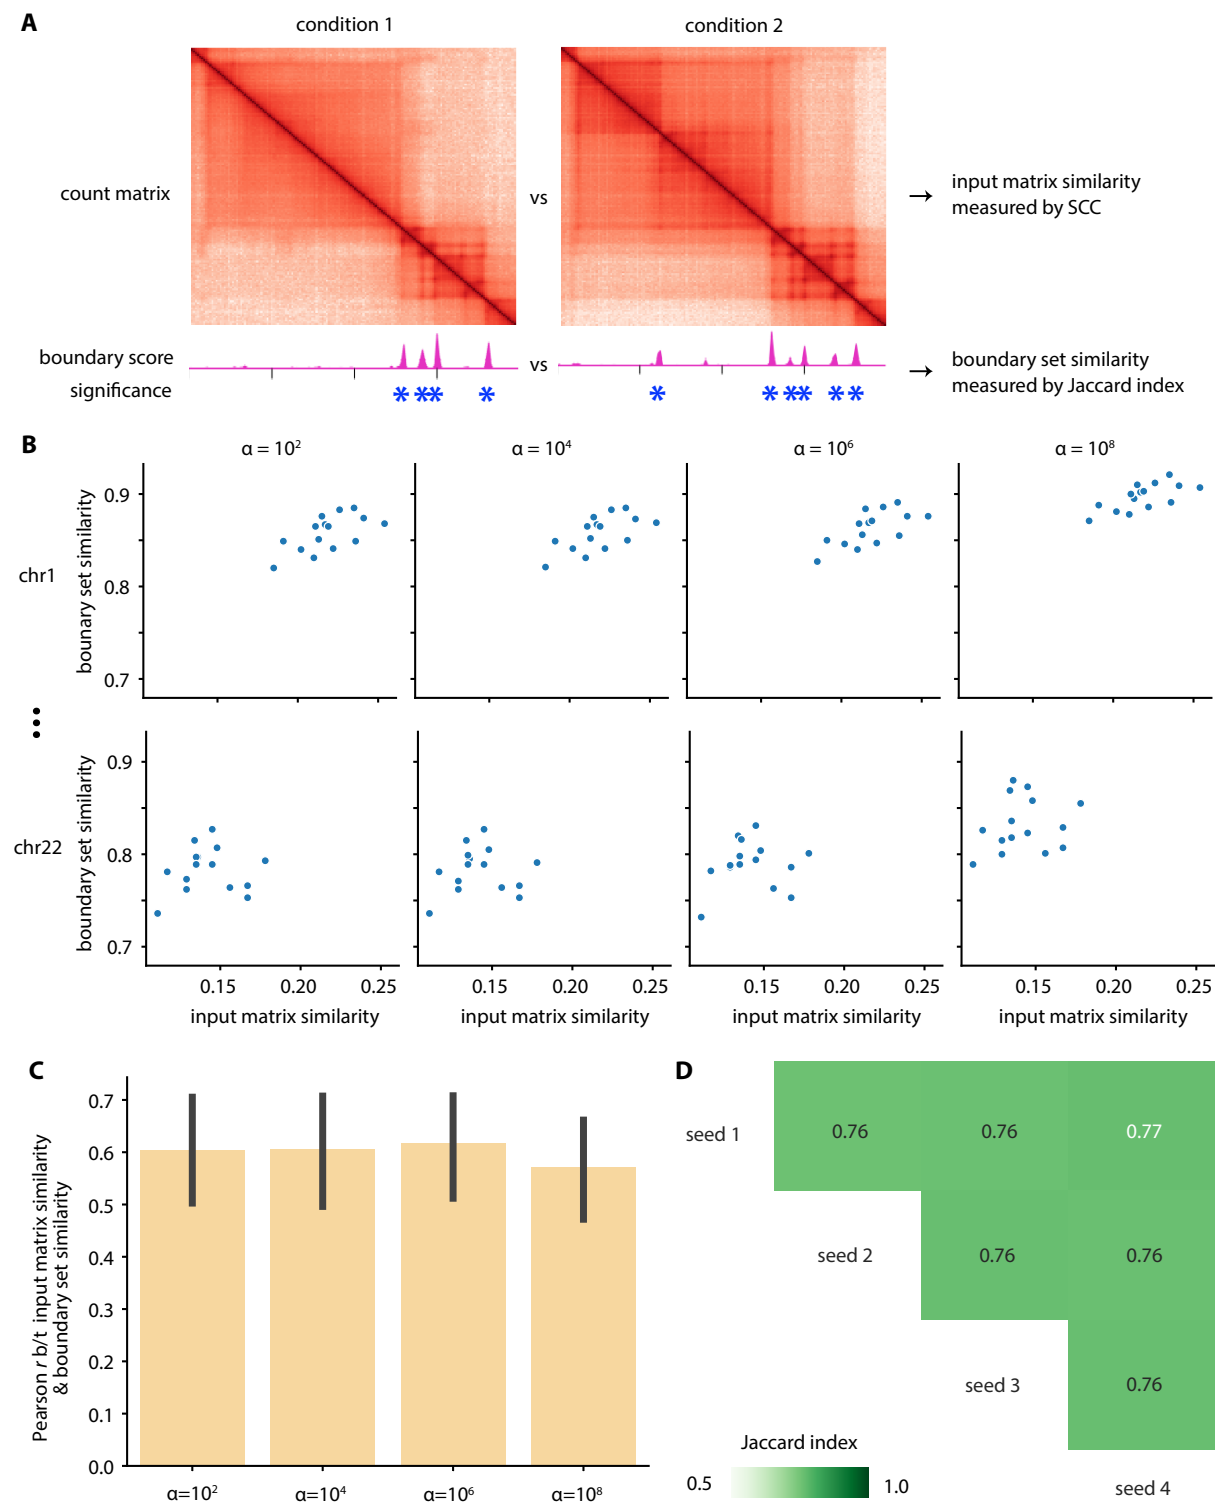

**Figure S18.** Hyperparameter  $\alpha$  selection for TGIF-DB. **(A)** The similarity between the input matrices is measured by SCC and the output boundary set agreement measured by Jaccard index. **(B)** Plotting input matrix similarity vs output boundary set agreement for each  $\alpha$  and each chromosome. Each dot represents one pairwise comparison. **(C)** Correlation between the input matrix similarity and the output boundary set agreement for different values of  $\alpha$ . **(D)** Similarity of boundary sets from different random initialization seeds (with  $\alpha = 10^6$ ), measured by Jaccard index.
