# Supplementary material for: Examining the dynamics of three-dimensional genome organization with multitask matrix factorization
Source: HighWire-hosted journal article supplement (doi:10.1101/gr.279930.124), 2025-03-20
Supplement: Supplemental_Figures.zip [file Supplemental_Fig_S19.pdf › supp fig/Supplemental_Fig_S19.pdf]

**Figure S19**

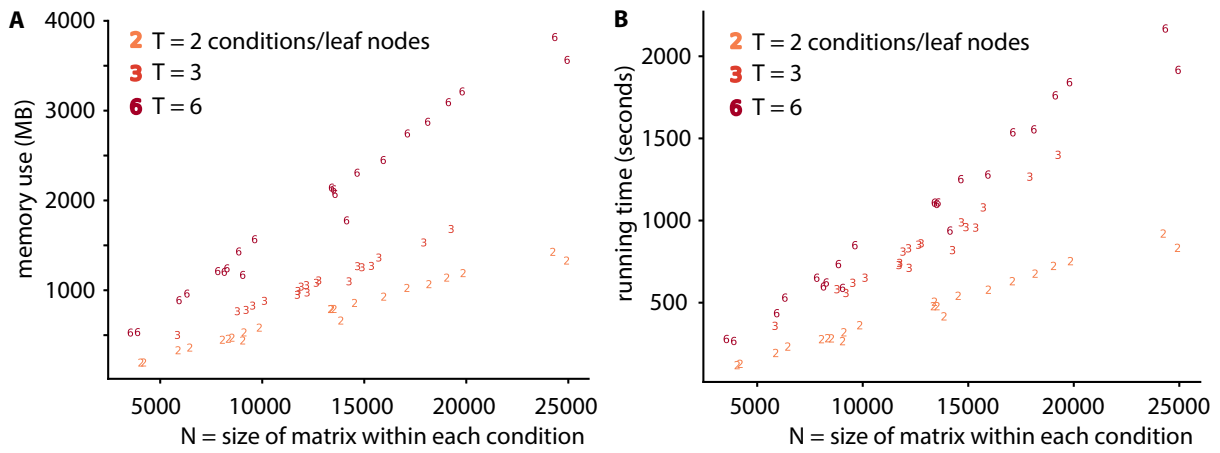

**Figure S19.** Resource use by TGIF-DB. **(A)** Size of each input matrix (100kb resolution) vs memory use in MB. **(B)** Size of each input matrix vs running time in seconds.  $T$  = the number of conditions/states/timepoints in a given run of TGIF-DB.
