# Supplementary material for: Examining the dynamics of three-dimensional genome organization with multitask matrix factorization
Source: HighWire-hosted journal article supplement (doi:10.1101/gr.279930.124), 2025-03-20
Supplement: Supplemental_Figures.zip [file Supplemental_Fig_S20.pdf › supp fig/Supplemental_Fig_S20.pdf]

Figure S20

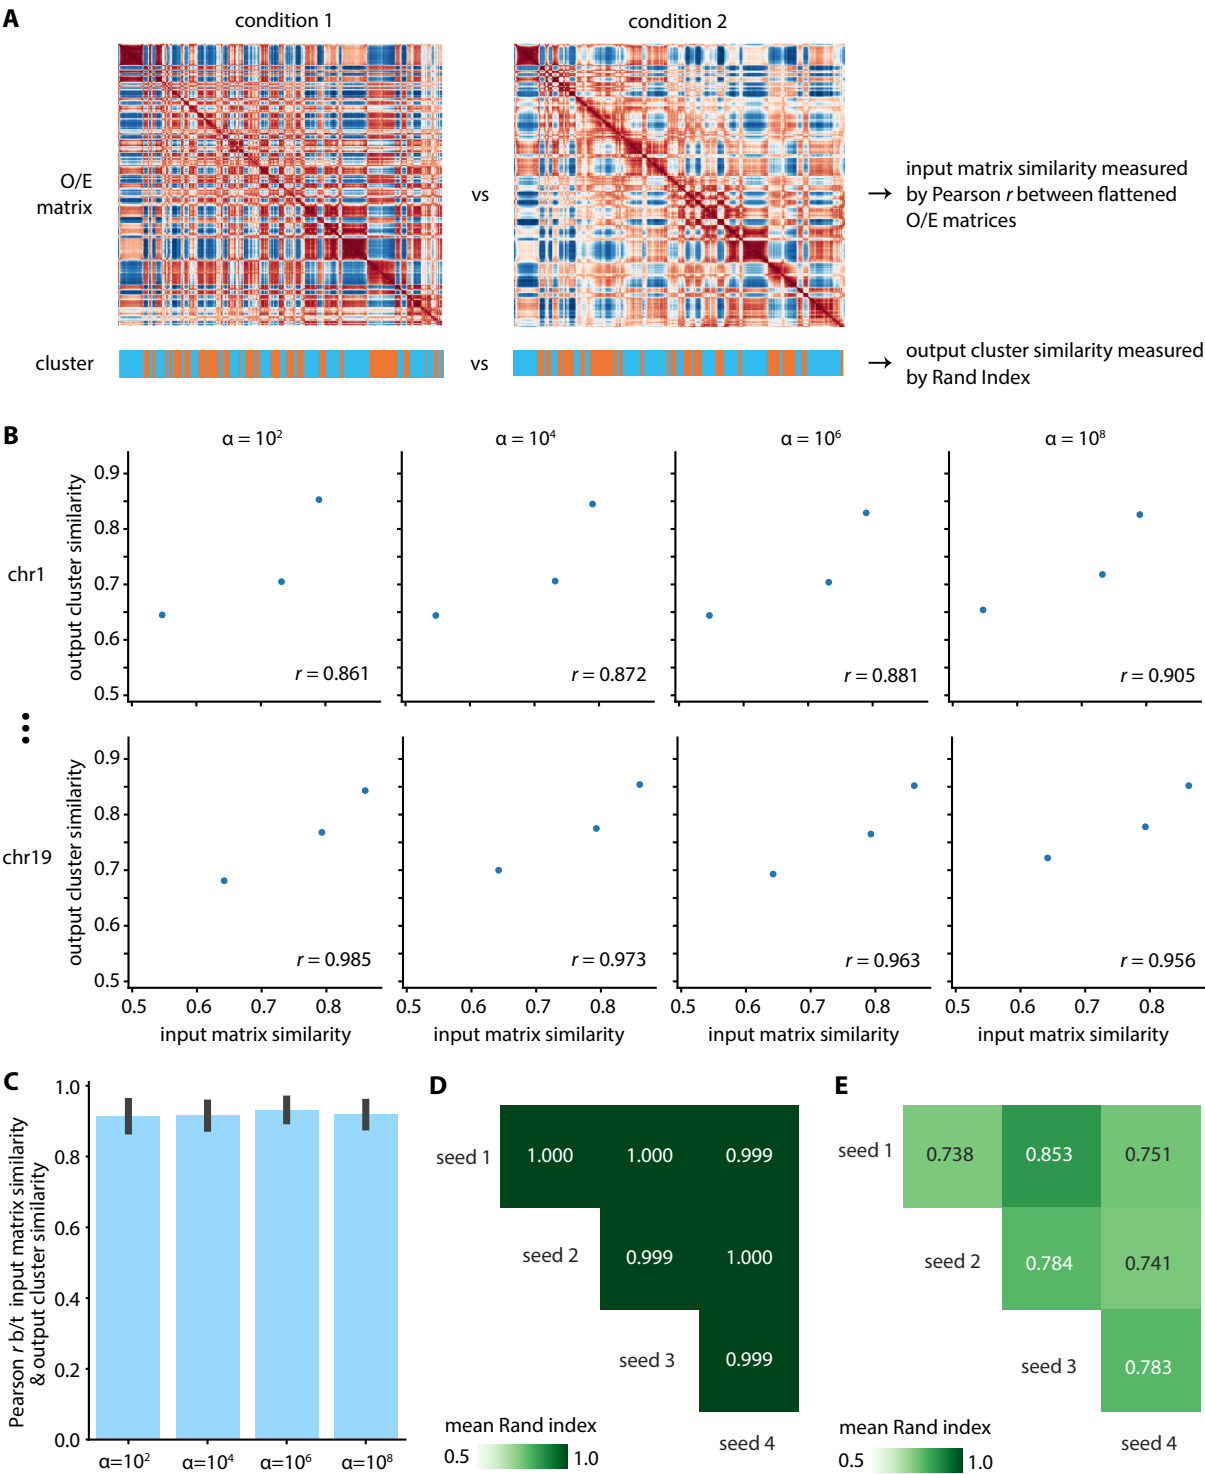

**Figure S20.** Hyperparameter  $\alpha$  selection for TGIF-DC. **(A)** The similarity between the O/E count matrices is measured by correlation of the flattened matrices the output cluster similarity measured by Rand index. **(B)** Plotting input matrix similarity vs output cluster similarity for each  $\alpha$  and each chromosome. Each dot represents one pairwise comparison. **(C)** Correlation between the input matrix similarity and the output cluster similarity for different values of  $\alpha$ . **(D)** Similarity of cluster assignments from different random initialization seeds (with  $\alpha = 10^4$ ), measured by Rand index.
