# Supplementary material for: Examining the dynamics of three-dimensional genome organization with multitask matrix factorization
Source: HighWire-hosted journal article supplement (doi:10.1101/gr.279930.124), 2025-03-20
Supplement: Supplemental_Figures.zip [file Supplemental_Fig_S23.pdf › supp fig/Supplemental_Fig_S23.pdf]

**Figure S23**

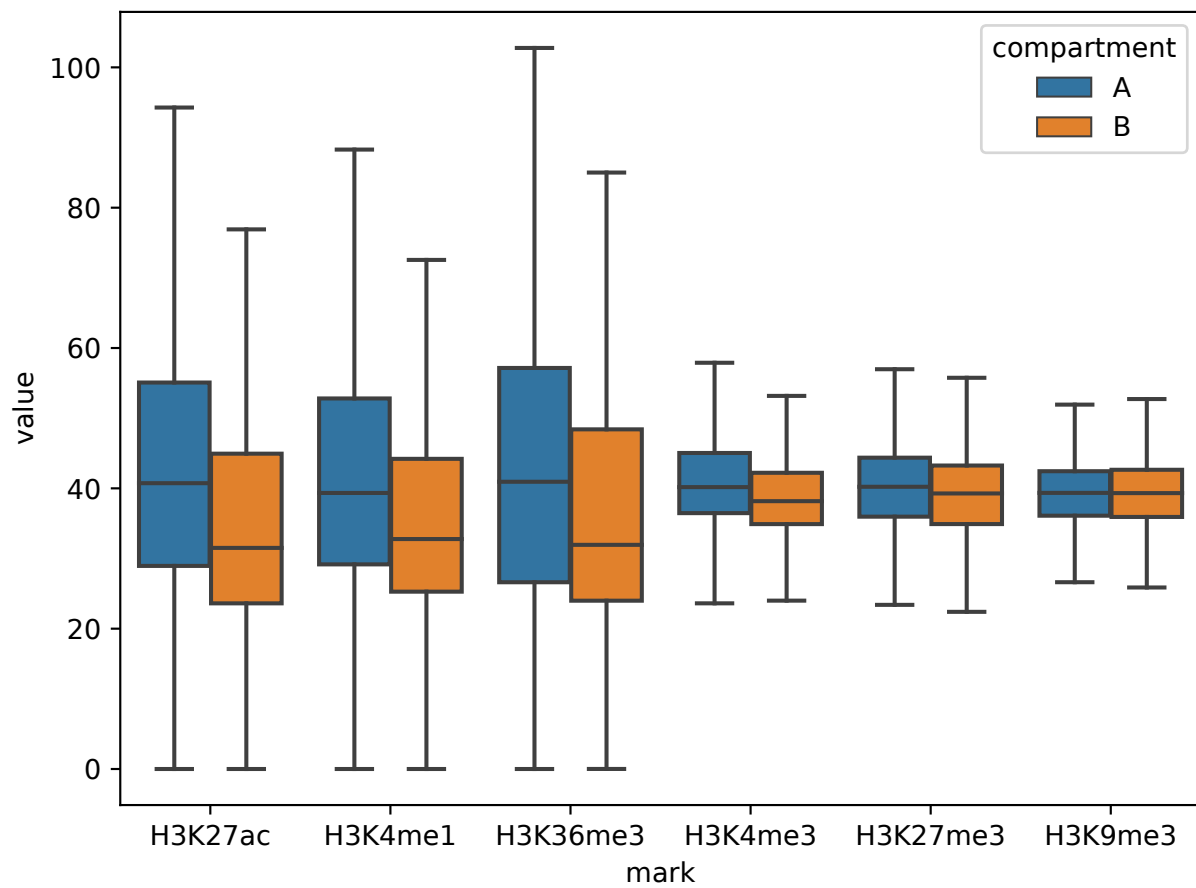

**Figure S23.** PCA-based A and B compartments (annotated based on GC content) and the distribution of various histone modification signals in each compartment (quantile-normalized mean signal).
