# Supplementary material for: Examining the dynamics of three-dimensional genome organization with multitask matrix factorization
Source: HighWire-hosted journal article supplement (doi:10.1101/gr.279930.124), 2025-03-20
Supplement: Supplemental_Figures.zip [file Supplemental_Fig_S24.pdf › supp fig/Supplemental_Fig_S24.pdf]

Figure S24

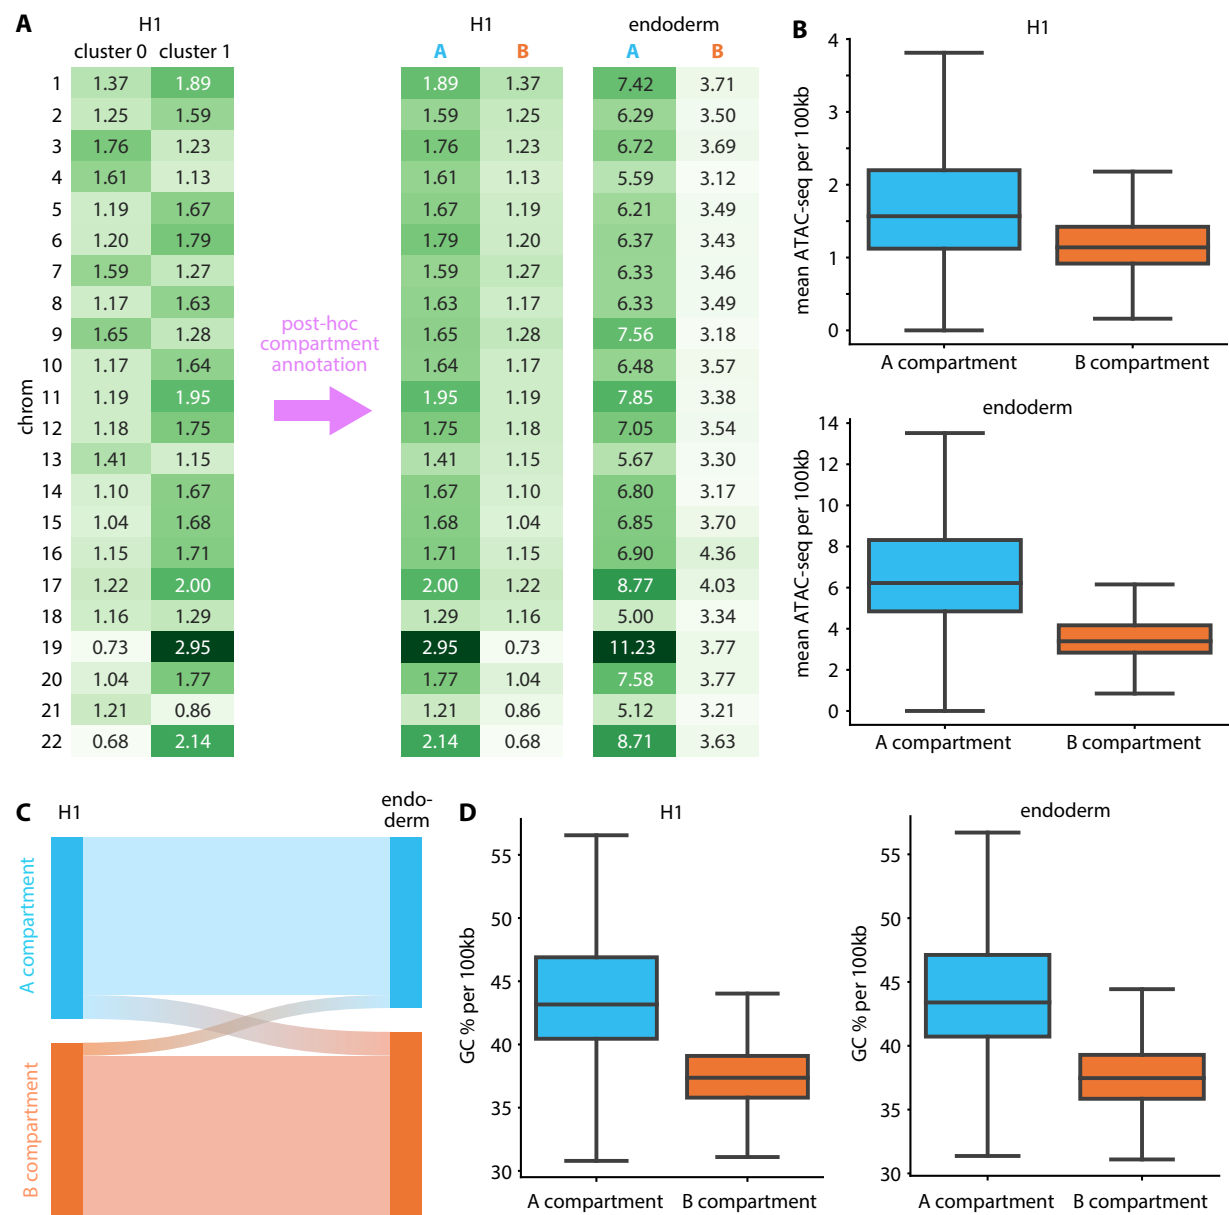

**Figure S24.** Post-hoc annotation of TGIF-DC clusters into A and B compartments in H1-endoderm dataset using accessibility. **(A)** For each chromosome, mean ATAC-seq signal in each 100kb bin is measured for each TGIF-DC cluster in H1. The cluster with higher mean ATAC-seq signal is annotated as A compartment; the other cluster B compartment. **(B)** Genome-wide mean ATAC-seq signal distribution by compartment in H1 (top) and endoderm (bottom). **(C)** Dynamic compartment assignment pattern from H1 to endoderm. **(D)** Genome-wide mean GC content per 100kb bin by compartment in H1 and endoderm.
