# Supplementary material for: Examining the dynamics of three-dimensional genome organization with multitask matrix factorization
Source: HighWire-hosted journal article supplement (doi:10.1101/gr.279930.124), 2025-03-20
Supplement: Supplemental_Figures.zip [file Supplemental_Fig_S25.pdf › supp fig/Supplemental_Fig_S25.pdf]

Figure S25

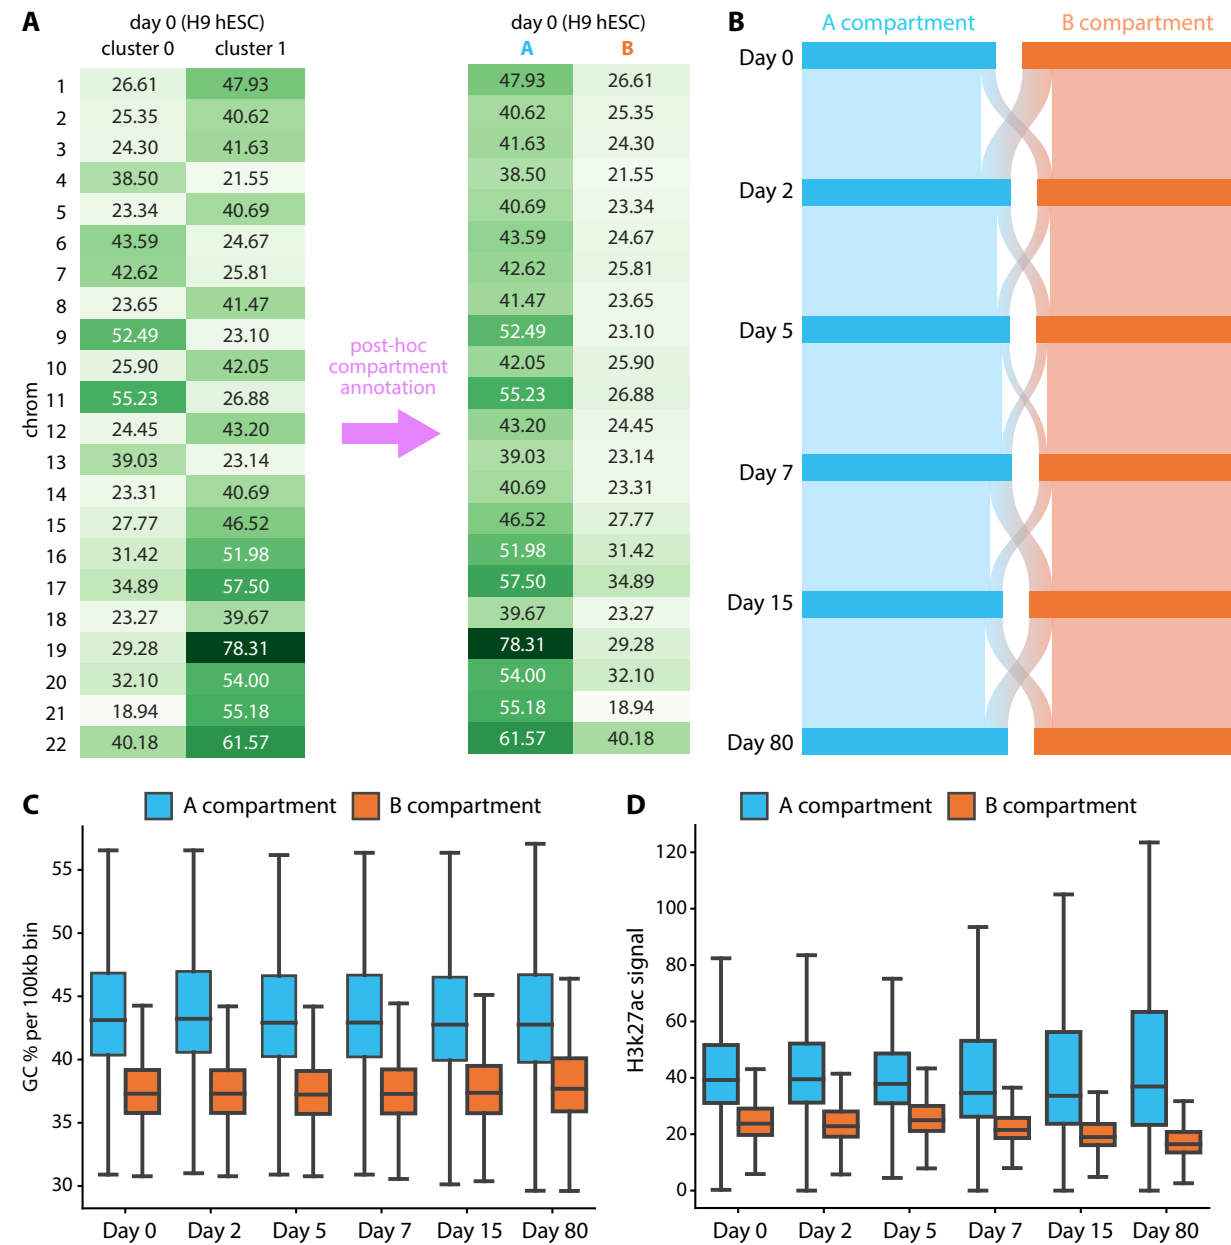

**Figure S25.** Post-hoc annotation of TGIF-DC clusters into A and B compartments in cardiomyocyte differentiation dataset using accessibility. **(A)** For each chromosome, mean DNase-seq signal in each 100kb bin is measured for each TGIF-DC cluster in day 0. The cluster with higher mean DNase-seq signal is annotated as A compartment; the other cluster B compartment. **(B)** Dynamic compartment assignment pattern from day 0 to day 80. **(C)** Genome-wide mean GC content per 100kb bin by compartment across all timepoints. **(D)** Genome-wide mean H3K27ac signal distribution by compartment across all timepoints.
