# Supplementary material for: Examining the dynamics of three-dimensional genome organization with multitask matrix factorization
Source: HighWire-hosted journal article supplement (doi:10.1101/gr.279930.124), 2025-03-20
Supplement: Supplemental_Tables.zip [file Supplemental_Table_S1.xlsx]

## Sheet: Legend
Table S1
4D Nucleome accession numbers for H1 and endoderm data.

## Sheet: Table S1
#Table S1: 4D Nucleome accession numbers for H1 and endoderm data
Condition/timepoint	HiC	ATACseq	RNAseq
H1	Overall experiment: 4DNESX75DD7R 4DNFIHHVSC26.pairs.gz: pairs format for Cscore 4DNFIIMZB6Y9.hic: replicate-merged data for PCA and TGIF 4DNFIJXKC55S.pairs.gz, 4DNFIS3MFEWL.pairs.gz: per-replicate data for dcHiC	4DNFIABCLLIK.bed	4DNFI8NRJGNY.tsv, 4DNFIXN6KBV6.tsv, 4DNFIFJ93NKG.tsv
endoderm	Umbrella experiment: 4DNESCOQ5YRS 4DNFIJWBWE41.hic: replicate-merged data for TGIF 4DNFI8ZY3RGN.pairs.gz, 4DNFI2LE5JIJ.pairs.gz: per-replicate data for dcHiC	4DNFIIQ3QD7D.bed	4DNFIKDO2JBN.tsv, 4DNFICX19FFC.tsv, 4DNFIH9KOSIN.tsv
