# Supplementary material for: Examining the dynamics of three-dimensional genome organization with multitask matrix factorization
Source: HighWire-hosted journal article supplement (doi:10.1101/gr.279930.124), 2025-03-20
Supplement: Supplemental_Tables.zip [file Supplemental_Table_S2.xlsx]

## Sheet: Legend
Table S2
Data sources and GEO accession numbers for mouse neural differentiation data.

## Sheet: Table S2
#Table S2: Data sources and GEO accession numbers for mouse neural differentiation data
Condition/timepoint	HiC	H3k27ac ChIPseq	H3k27me3 ChIPseq	H3k36me3 ChIPseq	H3k4me1 ChIPseq	H3k4me3 ChIPseq	H3k9me3 ChIPseq	RNAseq
ES	Pre-processed .hic files for Juicebox portal	N/A	N/A	N/A	N/A	N/A	N/A	GSM2533843, GSM2533844
NPC	Pre-processed .hic files for Juicebox portal	GSM2533868, GSM2533869	GSM2533870, GSM2533871	GSM2533872, GSM2533873	GSM2533862, GSM2533863	GSM2533864, GSM2533865	GSM2533866, GSM2533867	GSM2533845, GSM2533846
CN	Pre-processed .hic files for Juicebox portal	GSM2533886, GSM2533887	GSM2533888, GSM2533889	GSM2533890, GSM2533891	GSM2533880, GSM2533881	GSM2533882, GSM2533883	GSM2533884, GSM2533885	GSM2533847, GSM2533848
		(ChIPseq bigwig files were downloaded directly from https://ftp.ncbi.nlm.nih.gov/geo/series/GSE96nnn/GSE96107/suppl/; the above accessions are the source sample IDs for 2 replicates.)
