# Supplementary material for: Examining the dynamics of three-dimensional genome organization with multitask matrix factorization
Source: HighWire-hosted journal article supplement (doi:10.1101/gr.279930.124), 2025-03-20
Supplement: Supplemental_Tables.zip [file Supplemental_Table_S3.xlsx]

## Sheet: Legend
Table S3
GEO and ENCODE accession numbers for cardiomyocyte differentiation data.

## Sheet: Table S3
#Table S3: GEO and ENCODE accession numbers for cardiomyocyte differentiation data
Condition/timepoint	HiC	CTCF ChIPseq	H3k27ac ChIPseq	RNAseq	DNase-seq
Day 0 (H9 hESC)	GSM3262956, GSM3262957	GSM3263064, GSM3263065	GSM3262992, GSM3262993	GSM3262968, GSM3262969	ENCFF561INV.bigWig from experiment ENCSR000EJP
Day 2	GSM3262958, GSM3262959	GSM3263066, GSM3263067	GSM3262994, GSM3262995	GSM3262970, GSM3262971	N/A
Day 5	GSM3262960, GSM3262961	GSM3263068, GSM3263069	GSM3262996, GSM3262997	GSM3262972, GSM3262973	N/A
Day 7	GSM3262962, GSM3262963	GSM3263070, GSM3263071	GSM3262998, GSM3262999	GSM3262974, GSM3262975	N/A
Day 15	GSM3262964, GSM3262965	GSM3263072, GSM3263073	GSM3263000, GSM3263001	GSM3262976, GSM3262977	N/A
Day 80	GSM3262966, GSM3262967	GSM3263074	GSM3263002, GSM3263003	GSM3262978, GSM3262979	N/A
