# Supplementary material for: Examining the dynamics of three-dimensional genome organization with multitask matrix factorization
Source: HighWire-hosted journal article supplement (doi:10.1101/gr.279930.124), 2025-03-20
Supplement: Supplemental_Tables.zip [file Supplemental_Table_S4.xlsx]

## Sheet: Legend
Table S4
4D Nucleome accession number for GM12878.

## Sheet: Table S4
#Table S4: 4D Nucleome accession number for GM12878
	HiC
GM12878	4DNFIYECESRC.pairs.gz from experiment 4DNES3JX38V5
