# Supplementary material for: Examining the dynamics of three-dimensional genome organization with multitask matrix factorization
Source: HighWire-hosted journal article supplement (doi:10.1101/gr.279930.124), 2025-03-20
Supplement: Supplemental_Tables.zip [file Supplemental_Table_S5.xlsx]

## Sheet: Legend
Table S5
Differential expression fold enrichment analysis on H1-endoderm dataset. Each row represents one fold enrichment hypergeometric test.

## Sheet: Table S5
#Table S5: Differential expression fold enrichment analysis on H1-endoderm dataset
dataset	timepoints compared	N	p	M	q	all(N)	expected(p)	sampled(M)	success(q)	(q/M)/(p/N)	pval
H1 differentiated to endoderm	H1 vs endoderm	280909	94346	61917	23956	all regions	regions overlapping DE gene	within 100kb of sig db	within 100kb of sig db overlapping DE gene	1.15198	5.9686e-201
H1 differentiated to endoderm	H1 vs endoderm	280909	94346	250962	83905	all regions	regions overlapping DE gene	within tad with sig db	within tad with sig db overlapping DE gene	0.995456	1
H1 differentiated to endoderm	H1 vs endoderm	280909	94346	11769	3200	all regions	regions overlapping DE gene	within sig dc	within sig dc overlapping DE gene	0.809567	1
H1 differentiated to endoderm	H1 vs endoderm	280909	94346	61044	23577	all regions	regions overlapping DE gene	AB	AB overlapping DE gene	1.14997	2.91819e-192
H1 differentiated to endoderm	H1 vs endoderm	280909	94346	2487	839	all regions	regions overlapping DE gene	AC	AC overlapping DE gene	1.00445	0.42777
H1 differentiated to endoderm	H1 vs endoderm	280909	94346	10734	3031	all regions	regions overlapping DE gene	BC	BC overlapping DE gene	0.840749	1
H1 differentiated to endoderm	H1 vs endoderm	23862	11248	8427	4312	all genes	DE genes	genes overlapping with regions within 100kb of sig db	DE genes overlapping with regions within 100kb of sig db	1.08552	1.37436e-20
H1 differentiated to endoderm	H1 vs endoderm	23862	11248	21237	10056	all genes	DE genes	genes overlapping with regions within tad with sig db	DE genes overlapping with regions within tad with sig db	1.00453	0.0285948
H1 differentiated to endoderm	H1 vs endoderm	23862	11248	776	389	all genes	DE genes	genes overlapping with regions within sig dc	DE genes overlapping with regions within sig dc	1.06346	0.0415799
H1 differentiated to endoderm	H1 vs endoderm	23862	11248	8259	4230	all genes	DE genes	genes overlapping with regions AB	DE genes overlapping with regions AB	1.08654	1.88146e-20
H1 differentiated to endoderm	H1 vs endoderm	23862	11248	275	167	all genes	DE genes	genes overlapping with regions AC	DE genes overlapping with regions AC	1.28829	2.04915e-06
H1 differentiated to endoderm	H1 vs endoderm	23862	11248	704	364	all genes	DE genes	genes overlapping with regions BC	DE genes overlapping with regions BC	1.09688	0.00620596
