# Supplementary material for: Examining the dynamics of three-dimensional genome organization with multitask matrix factorization
Source: HighWire-hosted journal article supplement (doi:10.1101/gr.279930.124), 2025-03-20
Supplement: Supplemental_Tables.zip [file Supplemental_Table_S6.xlsx]

## Sheet: Legend
Table S6
Differential expression fold enrichment analysis on mouse neural differentiation dataset. Each row represents one fold enrichment hypergeometric test.

## Sheet: Table S6
#Table S6: Differential expression fold enrichment analysis on mouse neural differentiation dataset
dataset	timepoints compared	N	p	M	q	all(N)	expected(p)	sampled(M)	success(q)	(q/M)/(p/N)	pval
mouse neural differentiation	ES vs CN	240341	63748	60080	18350	all regions	regions overlapping DE gene	within 100kb of sig db	within 100kb of sig db overlapping DE gene	1.15151	6.13146e-144
mouse neural differentiation	ES vs CN	240341	63748	226816	59830	all regions	regions overlapping DE gene	within tad with sig db	within tad with sig db overlapping DE gene	0.994504	1
mouse neural differentiation	ES vs CN	240341	63748	33887	9400	all regions	regions overlapping DE gene	within sig dc	within sig dc overlapping DE gene	1.04582	2.47317e-08
mouse neural differentiation	ES vs CN	240341	63748	59541	18221	all regions	regions overlapping DE gene	AB	AB overlapping DE gene	1.15377	2.16638e-146
mouse neural differentiation	ES vs CN	240341	63748	8514	2707	all regions	regions overlapping DE gene	AC	AC overlapping DE gene	1.19871	1.45003e-28
mouse neural differentiation	ES vs CN	240341	63748	32060	8990	all regions	regions overlapping DE gene	BC	BC overlapping DE gene	1.0572	2.27786e-11
mouse neural differentiation	ES vs CN	41683	10739	12398	4174	all genes	DE genes	genes overlapping with regions within 100kb of sig db	DE genes overlapping with regions within 100kb of sig db	1.30676	5.9226e-124
mouse neural differentiation	ES vs CN	41683	10739	35217	9717	all genes	DE genes	genes overlapping with regions within tad with sig db	DE genes overlapping with regions within tad with sig db	1.07096	1.74368e-96
mouse neural differentiation	ES vs CN	41683	10739	4359	1316	all genes	DE genes	genes overlapping with regions within sig dc	DE genes overlapping with regions within sig dc	1.17183	1.51665e-12
mouse neural differentiation	ES vs CN	41683	10739	12273	4140	all genes	DE genes	genes overlapping with regions AB	DE genes overlapping with regions AB	1.30932	3.79194e-124
mouse neural differentiation	ES vs CN	41683	10739	1599	590	all genes	DE genes	genes overlapping with regions AC	DE genes overlapping with regions AC	1.43218	5.37039e-24
mouse neural differentiation	ES vs CN	41683	10739	4078	1247	all genes	DE genes	genes overlapping with regions BC	DE genes overlapping with regions BC	1.1869	1.42243e-13
mouse neural differentiation	ES vs NPC	240341	41944	51504	10128	all regions	regions overlapping DE gene	within 100kb of sig db	within 100kb of sig db overlapping DE gene	1.12678	1.26666e-49
mouse neural differentiation	ES vs NPC	240341	41944	223301	38436	all regions	regions overlapping DE gene	within tad with sig db	within tad with sig db overlapping DE gene	0.986292	1
mouse neural differentiation	ES vs NPC	240341	41944	18697	4192	all regions	regions overlapping DE gene	within sig dc	within sig dc overlapping DE gene	1.28472	2.00735e-73
mouse neural differentiation	ES vs NPC	240341	41944	50911	10014	all regions	regions overlapping DE gene	AB	AB overlapping DE gene	1.12708	3.8717e-49
mouse neural differentiation	ES vs NPC	240341	41944	4113	955	all regions	regions overlapping DE gene	AC	AC overlapping DE gene	1.33046	1.18117e-21
mouse neural differentiation	ES vs NPC	240341	41944	18060	4018	all regions	regions overlapping DE gene	BC	BC overlapping DE gene	1.27482	3.15944e-66
mouse neural differentiation	ES vs NPC	41683	5975	10800	2088	all genes	DE genes	genes overlapping with regions within 100kb of sig db	DE genes overlapping with regions within 100kb of sig db	1.34874	1.44941e-63
mouse neural differentiation	ES vs NPC	41683	5975	34578	5260	all genes	DE genes	genes overlapping with regions within tad with sig db	DE genes overlapping with regions within tad with sig db	1.06122	4.35338e-32
mouse neural differentiation	ES vs NPC	41683	5975	2266	498	all genes	DE genes	genes overlapping with regions within sig dc	DE genes overlapping with regions within sig dc	1.53317	2.61426e-24
mouse neural differentiation	ES vs NPC	41683	5975	10658	2061	all genes	DE genes	genes overlapping with regions AB	DE genes overlapping with regions AB	1.34904	1.51741e-62
mouse neural differentiation	ES vs NPC	41683	5975	707	176	all genes	DE genes	genes overlapping with regions AC	DE genes overlapping with regions AC	1.73666	2.72973e-14
mouse neural differentiation	ES vs NPC	41683	5975	2150	474	all genes	DE genes	genes overlapping with regions BC	DE genes overlapping with regions BC	1.53802	1.82412e-23
mouse neural differentiation	NPC vs CN	240341	42633	33951	7158	all regions	regions overlapping DE gene	within 100kb of sig db	within 100kb of sig db overlapping DE gene	1.18856	8.74033e-66
mouse neural differentiation	NPC vs CN	240341	42633	218993	38999	all regions	regions overlapping DE gene	within tad with sig db	within tad with sig db overlapping DE gene	1.00393	0.00192475
mouse neural differentiation	NPC vs CN	240341	42633	10550	1810	all regions	regions overlapping DE gene	within sig dc	within sig dc overlapping DE gene	0.967182	0.944283
mouse neural differentiation	NPC vs CN	240341	42633	33427	7065	all regions	regions overlapping DE gene	AB	AB overlapping DE gene	1.19151	1.43876e-66
mouse neural differentiation	NPC vs CN	240341	42633	1436	245	all regions	regions overlapping DE gene	AC	AC overlapping DE gene	0.96182	0.737238
mouse neural differentiation	NPC vs CN	240341	42633	9529	1651	all regions	regions overlapping DE gene	BC	BC overlapping DE gene	0.976746	0.855953
mouse neural differentiation	NPC vs CN	41683	5804	7777	1461	all genes	DE genes	genes overlapping with regions within 100kb of sig db	DE genes overlapping with regions within 100kb of sig db	1.34918	9.97357e-41
mouse neural differentiation	NPC vs CN	41683	5804	33806	5033	all genes	DE genes	genes overlapping with regions within tad with sig db	DE genes overlapping with regions within tad with sig db	1.06921	1.04552e-34
mouse neural differentiation	NPC vs CN	41683	5804	1256	223	all genes	DE genes	genes overlapping with regions within sig dc	DE genes overlapping with regions within sig dc	1.27511	4.8689e-05
mouse neural differentiation	NPC vs CN	41683	5804	7638	1434	all genes	DE genes	genes overlapping with regions AB	DE genes overlapping with regions AB	1.34835	1.08844e-39
mouse neural differentiation	NPC vs CN	41683	5804	278	46	all genes	DE genes	genes overlapping with regions AC	DE genes overlapping with regions AC	1.18835	0.0902474
mouse neural differentiation	NPC vs CN	41683	5804	1093	195	all genes	DE genes	genes overlapping with regions BC	DE genes overlapping with regions BC	1.28129	0.000102787
