# Supplementary material for: Examining the dynamics of three-dimensional genome organization with multitask matrix factorization
Source: HighWire-hosted journal article supplement (doi:10.1101/gr.279930.124), 2025-03-20
Supplement: Supplemental_Tables.zip [file Supplemental_Table_S7.xlsx]

## Sheet: Legend
Table S7
Differential expression fold enrichment analysis on cardiomyocyte dataset. Each row represents one fold enrichment hypergeometric test.

## Sheet: Table S7
#Table S7: Differential expression fold enrichment analysis on cardiomyocyte differentiation dataset
dataset	timepoints compared	N	p	M	q	all(N)	expected(p)	sampled(M)	success(q)	(q/M)/(p/N)	pval
cardiomyocyte differentiation	day0 vs day15	265912	66864	71948	20504	all regions	regions overlapping DE gene	within 100kb of sig db	within 100kb of sig db overlapping DE gene	1.13335	2.39728e-128
cardiomyocyte differentiation	day0 vs day15	265912	66864	255988	63502	all regions	regions overlapping DE gene	within tad with sig db	within tad with sig db overlapping DE gene	0.986537	1
cardiomyocyte differentiation	day0 vs day15	265912	66864	30897	7891	all regions	regions overlapping DE gene	within sig dc	within sig dc overlapping DE gene	1.01569	0.044041
cardiomyocyte differentiation	day0 vs day15	265912	66864	70947	20162	all regions	regions overlapping DE gene	AB	AB overlapping DE gene	1.13017	3.78077e-120
cardiomyocyte differentiation	day0 vs day15	265912	66864	8185	2339	all regions	regions overlapping DE gene	AC	AC overlapping DE gene	1.13647	3.38648e-13
cardiomyocyte differentiation	day0 vs day15	265912	66864	28277	6968	all regions	regions overlapping DE gene	BC	BC overlapping DE gene	0.979987	0.980258
cardiomyocyte differentiation	day0 vs day15	60234	9946	17917	3869	all genes	DE genes	genes overlapping with regions within 100kb of sig db	DE genes overlapping with regions within 100kb of sig db	1.30776	2.72413e-102
cardiomyocyte differentiation	day0 vs day15	60234	9946	49336	8498	all genes	DE genes	genes overlapping with regions within tad with sig db	DE genes overlapping with regions within tad with sig db	1.04315	5.35715e-25
cardiomyocyte differentiation	day0 vs day15	60234	9946	6005	797	all genes	DE genes	genes overlapping with regions within sig dc	DE genes overlapping with regions within sig dc	0.803783	1
cardiomyocyte differentiation	day0 vs day15	60234	9946	17597	3810	all genes	DE genes	genes overlapping with regions AB	DE genes overlapping with regions AB	1.31123	7.43043e-102
cardiomyocyte differentiation	day0 vs day15	60234	9946	1930	357	all genes	DE genes	genes overlapping with regions AC	DE genes overlapping with regions AC	1.12022	0.00845177
cardiomyocyte differentiation	day0 vs day15	60234	9946	5392	711	all genes	DE genes	genes overlapping with regions BC	DE genes overlapping with regions BC	0.79857	1
cardiomyocyte differentiation	day0 vs day2	265912	37559	59253	9310	all regions	regions overlapping DE gene	within 100kb of sig db	within 100kb of sig db overlapping DE gene	1.11241	6.00008e-36
cardiomyocyte differentiation	day0 vs day2	265912	37559	244741	34521	all regions	regions overlapping DE gene	within tad with sig db	within tad with sig db overlapping DE gene	0.998621	0.834132
cardiomyocyte differentiation	day0 vs day2	265912	37559	11599	1701	all regions	regions overlapping DE gene	within sig dc	within sig dc overlapping DE gene	1.03826	0.0430011
cardiomyocyte differentiation	day0 vs day2	265912	37559	58110	9158	all regions	regions overlapping DE gene	AB	AB overlapping DE gene	1.11577	4.3254e-37
cardiomyocyte differentiation	day0 vs day2	265912	37559	2522	379	all regions	regions overlapping DE gene	AC	AC overlapping DE gene	1.06394	0.0914006
cardiomyocyte differentiation	day0 vs day2	265912	37559	10010	1589	all regions	regions overlapping DE gene	BC	BC overlapping DE gene	1.12386	2.09501e-07
cardiomyocyte differentiation	day0 vs day2	60234	4552	14477	1506	all genes	DE genes	genes overlapping with regions within 100kb of sig db	DE genes overlapping with regions within 100kb of sig db	1.37653	2.86348e-47
cardiomyocyte differentiation	day0 vs day2	60234	4552	47356	3816	all genes	DE genes	genes overlapping with regions within tad with sig db	DE genes overlapping with regions within tad with sig db	1.06628	1.59407e-20
cardiomyocyte differentiation	day0 vs day2	60234	4552	2490	172	all genes	DE genes	genes overlapping with regions within sig dc	DE genes overlapping with regions within sig dc	0.914047	0.888556
cardiomyocyte differentiation	day0 vs day2	60234	4552	14135	1481	all genes	DE genes	genes overlapping with regions AB	DE genes overlapping with regions AB	1.38643	4.36908e-48
cardiomyocyte differentiation	day0 vs day2	60234	4552	622	58	all genes	DE genes	genes overlapping with regions AC	DE genes overlapping with regions AC	1.23389	0.0432575
cardiomyocyte differentiation	day0 vs day2	60234	4552	1974	158	all genes	DE genes	genes overlapping with regions BC	DE genes overlapping with regions BC	1.05913	0.208651
cardiomyocyte differentiation	day0 vs day5	265912	55105	63523	14966	all regions	regions overlapping DE gene	within 100kb of sig db	within 100kb of sig db overlapping DE gene	1.1369	2.24517e-89
cardiomyocyte differentiation	day0 vs day5	265912	55105	248803	50211	all regions	regions overlapping DE gene	within tad with sig db	within tad with sig db overlapping DE gene	0.973846	1
cardiomyocyte differentiation	day0 vs day5	265912	55105	20142	4711	all regions	regions overlapping DE gene	within sig dc	within sig dc overlapping DE gene	1.12865	4.53014e-22
cardiomyocyte differentiation	day0 vs day5	265912	55105	62299	14629	all regions	regions overlapping DE gene	AB	AB overlapping DE gene	1.13313	1.35058e-82
cardiomyocyte differentiation	day0 vs day5	265912	55105	4834	1252	all regions	regions overlapping DE gene	AC	AC overlapping DE gene	1.24981	1.15916e-18
cardiomyocyte differentiation	day0 vs day5	265912	55105	18251	4309	all regions	regions overlapping DE gene	BC	BC overlapping DE gene	1.1393	4.09679e-23
cardiomyocyte differentiation	day0 vs day5	60234	7193	15426	2400	all genes	DE genes	genes overlapping with regions within 100kb of sig db	DE genes overlapping with regions within 100kb of sig db	1.30284	9.99436e-56
cardiomyocyte differentiation	day0 vs day5	60234	7193	47429	5945	all genes	DE genes	genes overlapping with regions within tad with sig db	DE genes overlapping with regions within tad with sig db	1.04964	5.13789e-19
cardiomyocyte differentiation	day0 vs day5	60234	7193	3835	397	all genes	DE genes	genes overlapping with regions within sig dc	DE genes overlapping with regions within sig dc	0.866876	0.999223
cardiomyocyte differentiation	day0 vs day5	60234	7193	15027	2337	all genes	DE genes	genes overlapping with regions AB	DE genes overlapping with regions AB	1.30232	1.17706e-53
cardiomyocyte differentiation	day0 vs day5	60234	7193	1146	166	all genes	DE genes	genes overlapping with regions AC	DE genes overlapping with regions AC	1.21298	0.00389374
cardiomyocyte differentiation	day0 vs day5	60234	7193	3386	363	all genes	DE genes	genes overlapping with regions BC	DE genes overlapping with regions BC	0.897742	0.9879
cardiomyocyte differentiation	day0 vs day7	265912	58829	66316	17099	all regions	regions overlapping DE gene	within 100kb of sig db	within 100kb of sig db overlapping DE gene	1.16546	2.84646e-148
cardiomyocyte differentiation	day0 vs day7	265912	58829	248484	54886	all regions	regions overlapping DE gene	within tad with sig db	within tad with sig db overlapping DE gene	0.998412	0.94913
cardiomyocyte differentiation	day0 vs day7	265912	58829	22417	5807	all regions	regions overlapping DE gene	within sig dc	within sig dc overlapping DE gene	1.1709	5.98258e-45
cardiomyocyte differentiation	day0 vs day7	265912	58829	65053	16775	all regions	regions overlapping DE gene	AB	AB overlapping DE gene	1.16558	9.65021e-145
cardiomyocyte differentiation	day0 vs day7	265912	58829	5661	1700	all regions	regions overlapping DE gene	AC	AC overlapping DE gene	1.35738	8.8215e-45
cardiomyocyte differentiation	day0 vs day7	265912	58829	19689	5117	all regions	regions overlapping DE gene	BC	BC overlapping DE gene	1.17473	5.85893e-41
cardiomyocyte differentiation	day0 vs day7	60234	8343	16762	3078	all genes	DE genes	genes overlapping with regions within 100kb of sig db	DE genes overlapping with regions within 100kb of sig db	1.32575	1.29292e-84
cardiomyocyte differentiation	day0 vs day7	60234	8343	48231	7016	all genes	DE genes	genes overlapping with regions within tad with sig db	DE genes overlapping with regions within tad with sig db	1.05023	1.56859e-24
cardiomyocyte differentiation	day0 vs day7	60234	8343	4472	525	all genes	DE genes	genes overlapping with regions within sig dc	DE genes overlapping with regions within sig dc	0.847573	0.999992
cardiomyocyte differentiation	day0 vs day7	60234	8343	16384	3015	all genes	DE genes	genes overlapping with regions AB	DE genes overlapping with regions AB	1.32858	2.45718e-83
cardiomyocyte differentiation	day0 vs day7	60234	8343	1351	242	all genes	DE genes	genes overlapping with regions AC	DE genes overlapping with regions AC	1.29324	1.01518e-05
cardiomyocyte differentiation	day0 vs day7	60234	8343	3886	472	all genes	DE genes	genes overlapping with regions BC	DE genes overlapping with regions BC	0.876917	0.999324
cardiomyocyte differentiation	day0 vs day80	265912	73823	83292	25952	all regions	regions overlapping DE gene	within 100kb of sig db	within 100kb of sig db overlapping DE gene	1.12231	3.7169e-152
cardiomyocyte differentiation	day0 vs day80	265912	73823	263637	72760	all regions	regions overlapping DE gene	within tad with sig db	within tad with sig db overlapping DE gene	0.994106	1
cardiomyocyte differentiation	day0 vs day80	265912	73823	36017	11072	all regions	regions overlapping DE gene	within sig dc	within sig dc overlapping DE gene	1.1073	1.2527e-41
cardiomyocyte differentiation	day0 vs day80	265912	73823	82606	25679	all regions	regions overlapping DE gene	AB	AB overlapping DE gene	1.11973	3.41384e-144
cardiomyocyte differentiation	day0 vs day80	265912	73823	11556	3704	all regions	regions overlapping DE gene	AC	AC overlapping DE gene	1.15454	1.29656e-25
cardiomyocyte differentiation	day0 vs day80	265912	73823	34302	10543	all regions	regions overlapping DE gene	BC	BC overlapping DE gene	1.10711	2.49542e-39
cardiomyocyte differentiation	day0 vs day80	60234	10771	20485	4641	all genes	DE genes	genes overlapping with regions within 100kb of sig db	DE genes overlapping with regions within 100kb of sig db	1.26696	2.44106e-104
cardiomyocyte differentiation	day0 vs day80	60234	10771	50446	9356	all genes	DE genes	genes overlapping with regions within tad with sig db	DE genes overlapping with regions within tad with sig db	1.03717	2.25294e-23
cardiomyocyte differentiation	day0 vs day80	60234	10771	7223	1066	all genes	DE genes	genes overlapping with regions within sig dc	DE genes overlapping with regions within sig dc	0.825326	1
cardiomyocyte differentiation	day0 vs day80	60234	10771	20264	4582	all genes	DE genes	genes overlapping with regions AB	DE genes overlapping with regions AB	1.26449	8.53144e-101
cardiomyocyte differentiation	day0 vs day80	60234	10771	2772	546	all genes	DE genes	genes overlapping with regions AC	DE genes overlapping with regions AC	1.1015	0.00535408
cardiomyocyte differentiation	day0 vs day80	60234	10771	6660	1008	all genes	DE genes	genes overlapping with regions BC	DE genes overlapping with regions BC	0.846393	1
cardiomyocyte differentiation	day15 vs day80	265912	27504	59406	7016	all regions	regions overlapping DE gene	within 100kb of sig db	within 100kb of sig db overlapping DE gene	1.14183	8.8378e-40
cardiomyocyte differentiation	day15 vs day80	265912	27504	254361	26358	all regions	regions overlapping DE gene	within tad with sig db	within tad with sig db overlapping DE gene	1.00185	0.0613058
cardiomyocyte differentiation	day15 vs day80	265912	27504	16590	2598	all regions	regions overlapping DE gene	within sig dc	within sig dc overlapping DE gene	1.51403	1.69799e-106
cardiomyocyte differentiation	day15 vs day80	265912	27504	58487	6916	all regions	regions overlapping DE gene	AB	AB overlapping DE gene	1.14324	9.41179e-40
cardiomyocyte differentiation	day15 vs day80	265912	27504	3145	540	all regions	regions overlapping DE gene	AC	AC overlapping DE gene	1.66003	4.92454e-32
cardiomyocyte differentiation	day15 vs day80	265912	27504	15669	2523	all regions	regions overlapping DE gene	BC	BC overlapping DE gene	1.55675	2.72422e-116
cardiomyocyte differentiation	day15 vs day80	60234	3345	15185	1183	all genes	DE genes	genes overlapping with regions within 100kb of sig db	DE genes overlapping with regions within 100kb of sig db	1.40286	1.28727e-41
cardiomyocyte differentiation	day15 vs day80	60234	3345	49017	2820	all genes	DE genes	genes overlapping with regions within tad with sig db	DE genes overlapping with regions within tad with sig db	1.03597	2.2533e-06
cardiomyocyte differentiation	day15 vs day80	60234	3345	2500	181	all genes	DE genes	genes overlapping with regions within sig dc	DE genes overlapping with regions within sig dc	1.30372	0.000125347
cardiomyocyte differentiation	day15 vs day80	60234	3345	14913	1162	all genes	DE genes	genes overlapping with regions AB	DE genes overlapping with regions AB	1.40309	1.11421e-40
cardiomyocyte differentiation	day15 vs day80	60234	3345	709	67	all genes	DE genes	genes overlapping with regions AC	DE genes overlapping with regions AC	1.70167	1.02035e-05
cardiomyocyte differentiation	day15 vs day80	60234	3345	2346	174	all genes	DE genes	genes overlapping with regions BC	DE genes overlapping with regions BC	1.33557	4.89318e-05
cardiomyocyte differentiation	day2 vs day15	265912	59901	62248	16437	all regions	regions overlapping DE gene	within 100kb of sig db	within 100kb of sig db overlapping DE gene	1.1722	6.7158e-151
cardiomyocyte differentiation	day2 vs day15	265912	59901	252513	56438	all regions	regions overlapping DE gene	within tad with sig db	within tad with sig db overlapping DE gene	0.992183	1
cardiomyocyte differentiation	day2 vs day15	265912	59901	19270	4889	all regions	regions overlapping DE gene	within sig dc	within sig dc overlapping DE gene	1.12627	1.55012e-22
cardiomyocyte differentiation	day2 vs day15	265912	59901	61192	16152	all regions	regions overlapping DE gene	AB	AB overlapping DE gene	1.17175	7.63451e-147
cardiomyocyte differentiation	day2 vs day15	265912	59901	4655	1249	all regions	regions overlapping DE gene	AC	AC overlapping DE gene	1.1911	1.59478e-12
cardiomyocyte differentiation	day2 vs day15	265912	59901	17642	4486	all regions	regions overlapping DE gene	BC	BC overlapping DE gene	1.1288	2.04134e-21
cardiomyocyte differentiation	day2 vs day15	60234	8042	16138	2990	all genes	DE genes	genes overlapping with regions within 100kb of sig db	DE genes overlapping with regions within 100kb of sig db	1.38771	2.5062e-107
cardiomyocyte differentiation	day2 vs day15	60234	8042	48544	6778	all genes	DE genes	genes overlapping with regions within tad with sig db	DE genes overlapping with regions within tad with sig db	1.04579	1.71081e-20
cardiomyocyte differentiation	day2 vs day15	60234	8042	3173	442	all genes	DE genes	genes overlapping with regions within sig dc	DE genes overlapping with regions within sig dc	1.04335	0.15588
cardiomyocyte differentiation	day2 vs day15	60234	8042	15845	2943	all genes	DE genes	genes overlapping with regions AB	DE genes overlapping with regions AB	1.39116	2.02745e-106
cardiomyocyte differentiation	day2 vs day15	60234	8042	1017	195	all genes	DE genes	genes overlapping with regions AC	DE genes overlapping with regions AC	1.43612	6.5355e-08
cardiomyocyte differentiation	day2 vs day15	60234	8042	2897	414	all genes	DE genes	genes overlapping with regions BC	DE genes overlapping with regions BC	1.07036	0.0613825
cardiomyocyte differentiation	day2 vs day5	265912	31232	53946	7143	all regions	regions overlapping DE gene	within 100kb of sig db	within 100kb of sig db overlapping DE gene	1.12735	3.72726e-33
cardiomyocyte differentiation	day2 vs day5	265912	31232	246676	29281	all regions	regions overlapping DE gene	within tad with sig db	within tad with sig db overlapping DE gene	1.01064	1.26677e-13
cardiomyocyte differentiation	day2 vs day5	265912	31232	9560	1714	all regions	regions overlapping DE gene	within sig dc	within sig dc overlapping DE gene	1.52648	1.02297e-72
cardiomyocyte differentiation	day2 vs day5	265912	31232	52677	6989	all regions	regions overlapping DE gene	AB	AB overlapping DE gene	1.12962	2.6358e-33
cardiomyocyte differentiation	day2 vs day5	265912	31232	2406	592	all regions	regions overlapping DE gene	AC	AC overlapping DE gene	2.0949	1.93156e-69
cardiomyocyte differentiation	day2 vs day5	265912	31232	8741	1572	all regions	regions overlapping DE gene	BC	BC overlapping DE gene	1.53119	1.53005e-67
cardiomyocyte differentiation	day2 vs day5	60234	3560	12942	1085	all genes	DE genes	genes overlapping with regions within 100kb of sig db	DE genes overlapping with regions within 100kb of sig db	1.41847	1.05476e-38
cardiomyocyte differentiation	day2 vs day5	60234	3560	46916	2971	all genes	DE genes	genes overlapping with regions within tad with sig db	DE genes overlapping with regions within tad with sig db	1.07145	7.05172e-18
cardiomyocyte differentiation	day2 vs day5	60234	3560	1445	135	all genes	DE genes	genes overlapping with regions within sig dc	DE genes overlapping with regions within sig dc	1.58073	7.13103e-08
cardiomyocyte differentiation	day2 vs day5	60234	3560	12579	1053	all genes	DE genes	genes overlapping with regions AB	DE genes overlapping with regions AB	1.41636	5.09787e-37
cardiomyocyte differentiation	day2 vs day5	60234	3560	457	72	all genes	DE genes	genes overlapping with regions AC	DE genes overlapping with regions AC	2.66568	1.20936e-14
cardiomyocyte differentiation	day2 vs day5	60234	3560	1306	129	all genes	DE genes	genes overlapping with regions BC	DE genes overlapping with regions BC	1.67124	5.48725e-09
cardiomyocyte differentiation	day2 vs day7	265912	43172	60621	11649	all regions	regions overlapping DE gene	within 100kb of sig db	within 100kb of sig db overlapping DE gene	1.18359	1.94778e-110
cardiomyocyte differentiation	day2 vs day7	265912	43172	245294	40672	all regions	regions overlapping DE gene	within tad with sig db	within tad with sig db overlapping DE gene	1.02128	4.57317e-67
cardiomyocyte differentiation	day2 vs day7	265912	43172	12820	3316	all regions	regions overlapping DE gene	within sig dc	within sig dc overlapping DE gene	1.59317	4.96626e-179
cardiomyocyte differentiation	day2 vs day7	265912	43172	59440	11436	all regions	regions overlapping DE gene	AB	AB overlapping DE gene	1.18503	2.51441e-109
cardiomyocyte differentiation	day2 vs day7	265912	43172	3502	988	all regions	regions overlapping DE gene	AC	AC overlapping DE gene	1.73771	2.8316e-72
cardiomyocyte differentiation	day2 vs day7	265912	43172	11791	3135	all regions	regions overlapping DE gene	BC	BC overlapping DE gene	1.63766	7.42243e-188
cardiomyocyte differentiation	day2 vs day7	60234	5439	15536	1977	all genes	DE genes	genes overlapping with regions within 100kb of sig db	DE genes overlapping with regions within 100kb of sig db	1.40926	2.95406e-73
cardiomyocyte differentiation	day2 vs day7	60234	5439	47713	4567	all genes	DE genes	genes overlapping with regions within tad with sig db	DE genes overlapping with regions within tad with sig db	1.06003	5.02513e-21
cardiomyocyte differentiation	day2 vs day7	60234	5439	2003	267	all genes	DE genes	genes overlapping with regions within sig dc	DE genes overlapping with regions within sig dc	1.47623	4.57993e-11
cardiomyocyte differentiation	day2 vs day7	60234	5439	15191	1939	all genes	DE genes	genes overlapping with regions AB	DE genes overlapping with regions AB	1.41356	1.79694e-72
cardiomyocyte differentiation	day2 vs day7	60234	5439	709	136	all genes	DE genes	genes overlapping with regions AC	DE genes overlapping with regions AC	2.1243	1.36663e-17
cardiomyocyte differentiation	day2 vs day7	60234	5439	1842	254	all genes	DE genes	genes overlapping with regions BC	DE genes overlapping with regions BC	1.5271	4.27408e-12
cardiomyocyte differentiation	day2 vs day80	265912	73613	74658	23405	all regions	regions overlapping DE gene	within 100kb of sig db	within 100kb of sig db overlapping DE gene	1.13244	1.11419e-151
cardiomyocyte differentiation	day2 vs day80	265912	73613	261334	71577	all regions	regions overlapping DE gene	within tad with sig db	within tad with sig db overlapping DE gene	0.989375	1
cardiomyocyte differentiation	day2 vs day80	265912	73613	27840	9212	all regions	regions overlapping DE gene	within sig dc	within sig dc overlapping DE gene	1.19528	5.6423e-98
cardiomyocyte differentiation	day2 vs day80	265912	73613	73733	23083	all regions	regions overlapping DE gene	AB	AB overlapping DE gene	1.13087	1.16135e-145
cardiomyocyte differentiation	day2 vs day80	265912	73613	8226	2951	all regions	regions overlapping DE gene	AC	AC overlapping DE gene	1.29588	3.79321e-61
cardiomyocyte differentiation	day2 vs day80	265912	73613	26681	8757	all regions	regions overlapping DE gene	BC	BC overlapping DE gene	1.1856	8.01582e-85
cardiomyocyte differentiation	day2 vs day80	60234	10304	18651	4157	all genes	DE genes	genes overlapping with regions within 100kb of sig db	DE genes overlapping with regions within 100kb of sig db	1.30291	1.07609e-109
cardiomyocyte differentiation	day2 vs day80	60234	10304	49809	8816	all genes	DE genes	genes overlapping with regions within tad with sig db	DE genes overlapping with regions within tad with sig db	1.03466	3.33879e-18
cardiomyocyte differentiation	day2 vs day80	60234	10304	4810	845	all genes	DE genes	genes overlapping with regions within sig dc	DE genes overlapping with regions within sig dc	1.02695	0.182558
cardiomyocyte differentiation	day2 vs day80	60234	10304	18341	4098	all genes	DE genes	genes overlapping with regions AB	DE genes overlapping with regions AB	1.30613	3.08341e-109
cardiomyocyte differentiation	day2 vs day80	60234	10304	1840	428	all genes	DE genes	genes overlapping with regions AC	DE genes overlapping with regions AC	1.35976	3.14793e-12
cardiomyocyte differentiation	day2 vs day80	60234	10304	4622	819	all genes	DE genes	genes overlapping with regions BC	DE genes overlapping with regions BC	1.03583	0.120856
cardiomyocyte differentiation	day5 vs day15	265912	37276	57254	9461	all regions	regions overlapping DE gene	within 100kb of sig db	within 100kb of sig db overlapping DE gene	1.1788	2.43732e-82
cardiomyocyte differentiation	day5 vs day15	265912	37276	247022	34787	all regions	regions overlapping DE gene	within tad with sig db	within tad with sig db overlapping DE gene	1.00459	0.000237687
cardiomyocyte differentiation	day5 vs day15	265912	37276	8690	1418	all regions	regions overlapping DE gene	within sig dc	within sig dc overlapping DE gene	1.16403	3.4862e-10
cardiomyocyte differentiation	day5 vs day15	265912	37276	56058	9276	all regions	regions overlapping DE gene	AB	AB overlapping DE gene	1.18041	1.409e-81
cardiomyocyte differentiation	day5 vs day15	265912	37276	1768	329	all regions	regions overlapping DE gene	AC	AC overlapping DE gene	1.32746	3.40835e-08
cardiomyocyte differentiation	day5 vs day15	265912	37276	8051	1278	all regions	regions overlapping DE gene	BC	BC overlapping DE gene	1.13237	7.653e-07
cardiomyocyte differentiation	day5 vs day15	60234	4755	14767	1638	all genes	DE genes	genes overlapping with regions within 100kb of sig db	DE genes overlapping with regions within 100kb of sig db	1.40512	3.38199e-58
cardiomyocyte differentiation	day5 vs day15	60234	4755	47863	3972	all genes	DE genes	genes overlapping with regions within tad with sig db	DE genes overlapping with regions within tad with sig db	1.05124	5.12755e-14
cardiomyocyte differentiation	day5 vs day15	60234	4755	1489	111	all genes	DE genes	genes overlapping with regions within sig dc	DE genes overlapping with regions within sig dc	0.944321	0.718949
cardiomyocyte differentiation	day5 vs day15	60234	4755	14389	1596	all genes	DE genes	genes overlapping with regions AB	DE genes overlapping with regions AB	1.40506	3.18181e-56
cardiomyocyte differentiation	day5 vs day15	60234	4755	363	45	all genes	DE genes	genes overlapping with regions AC	DE genes overlapping with regions AC	1.57035	0.00104737
cardiomyocyte differentiation	day5 vs day15	60234	4755	1343	99	all genes	DE genes	genes overlapping with regions BC	DE genes overlapping with regions BC	0.933792	0.745232
cardiomyocyte differentiation	day5 vs day7	265912	3994	55824	885	all regions	regions overlapping DE gene	within 100kb of sig db	within 100kb of sig db overlapping DE gene	1.05549	0.033449
cardiomyocyte differentiation	day5 vs day7	265912	3994	242769	3844	all regions	regions overlapping DE gene	within tad with sig db	within tad with sig db overlapping DE gene	1.05419	3.90409e-36
cardiomyocyte differentiation	day5 vs day7	265912	3994	3470	170	all regions	regions overlapping DE gene	within sig dc	within sig dc overlapping DE gene	3.26174	2.16723e-40
cardiomyocyte differentiation	day5 vs day7	265912	3994	54493	867	all regions	regions overlapping DE gene	AB	AB overlapping DE gene	1.05927	0.0270539
cardiomyocyte differentiation	day5 vs day7	265912	3994	500	38	all regions	regions overlapping DE gene	AC	AC overlapping DE gene	5.05992	1.51154e-16
cardiomyocyte differentiation	day5 vs day7	265912	3994	3117	170	all regions	regions overlapping DE gene	BC	BC overlapping DE gene	3.63113	2.42734e-46
cardiomyocyte differentiation	day5 vs day7	60234	416	13939	132	all genes	DE genes	genes overlapping with regions within 100kb of sig db	DE genes overlapping with regions within 100kb of sig db	1.37117	2.23861e-05
cardiomyocyte differentiation	day5 vs day7	60234	416	47272	364	all genes	DE genes	genes overlapping with regions within tad with sig db	DE genes overlapping with regions within tad with sig db	1.11493	6.66176e-07
cardiomyocyte differentiation	day5 vs day7	60234	416	593	9	all genes	DE genes	genes overlapping with regions within sig dc	DE genes overlapping with regions within sig dc	2.19754	0.00887216
cardiomyocyte differentiation	day5 vs day7	60234	416	13558	129	all genes	DE genes	genes overlapping with regions AB	DE genes overlapping with regions AB	1.37766	2.30364e-05
cardiomyocyte differentiation	day5 vs day7	60234	416	117	5	all genes	DE genes	genes overlapping with regions AC	DE genes overlapping with regions AC	6.18775	0.000171692
cardiomyocyte differentiation	day5 vs day7	60234	416	530	9	all genes	DE genes	genes overlapping with regions BC	DE genes overlapping with regions BC	2.45875	0.00416496
cardiomyocyte differentiation	day5 vs day80	265912	60259	70622	17875	all regions	regions overlapping DE gene	within 100kb of sig db	within 100kb of sig db overlapping DE gene	1.11692	9.65035e-85
cardiomyocyte differentiation	day5 vs day80	265912	60259	256776	57671	all regions	regions overlapping DE gene	within tad with sig db	within tad with sig db overlapping DE gene	0.991104	1
cardiomyocyte differentiation	day5 vs day80	265912	60259	21690	6285	all regions	regions overlapping DE gene	within sig dc	within sig dc overlapping DE gene	1.27868	3.09353e-113
cardiomyocyte differentiation	day5 vs day80	265912	60259	69613	17646	all regions	regions overlapping DE gene	AB	AB overlapping DE gene	1.11859	1.92309e-85
cardiomyocyte differentiation	day5 vs day80	265912	60259	5867	1853	all regions	regions overlapping DE gene	AC	AC overlapping DE gene	1.39372	3.18562e-57
cardiomyocyte differentiation	day5 vs day80	265912	60259	20530	5878	all regions	regions overlapping DE gene	BC	BC overlapping DE gene	1.26345	6.58221e-96
cardiomyocyte differentiation	day5 vs day80	60234	7873	17734	3065	all genes	DE genes	genes overlapping with regions within 100kb of sig db	DE genes overlapping with regions within 100kb of sig db	1.32229	4.53373e-84
cardiomyocyte differentiation	day5 vs day80	60234	7873	49500	6698	all genes	DE genes	genes overlapping with regions within tad with sig db	DE genes overlapping with regions within tad with sig db	1.03524	9.40718e-14
cardiomyocyte differentiation	day5 vs day80	60234	7873	3734	482	all genes	DE genes	genes overlapping with regions within sig dc	DE genes overlapping with regions within sig dc	0.987584	0.607838
cardiomyocyte differentiation	day5 vs day80	60234	7873	17466	3021	all genes	DE genes	genes overlapping with regions AB	DE genes overlapping with regions AB	1.3233	9.30537e-83
cardiomyocyte differentiation	day5 vs day80	60234	7873	1267	240	all genes	DE genes	genes overlapping with regions AC	DE genes overlapping with regions AC	1.44923	1.07244e-09
cardiomyocyte differentiation	day5 vs day80	60234	7873	3550	465	all genes	DE genes	genes overlapping with regions BC	DE genes overlapping with regions BC	1.00213	0.467308
cardiomyocyte differentiation	day7 vs day15	265912	18540	54197	4115	all regions	regions overlapping DE gene	within 100kb of sig db	within 100kb of sig db overlapping DE gene	1.08899	1.44362e-10
cardiomyocyte differentiation	day7 vs day15	265912	18540	240499	16548	all regions	regions overlapping DE gene	within tad with sig db	within tad with sig db overlapping DE gene	0.986871	1
cardiomyocyte differentiation	day7 vs day15	265912	18540	5540	304	all regions	regions overlapping DE gene	within sig dc	within sig dc overlapping DE gene	0.787031	0.999997
cardiomyocyte differentiation	day7 vs day15	265912	18540	52724	3951	all regions	regions overlapping DE gene	AB	AB overlapping DE gene	1.0748	9.03066e-08
cardiomyocyte differentiation	day7 vs day15	265912	18540	1065	45	all regions	regions overlapping DE gene	AC	AC overlapping DE gene	0.606026	0.999891
cardiomyocyte differentiation	day7 vs day15	265912	18540	5027	216	all regions	regions overlapping DE gene	BC	BC overlapping DE gene	0.616273	1
cardiomyocyte differentiation	day7 vs day15	60234	2261	13250	635	all genes	DE genes	genes overlapping with regions within 100kb of sig db	DE genes overlapping with regions within 100kb of sig db	1.27673	1.80031e-12
cardiomyocyte differentiation	day7 vs day15	60234	2261	46017	1763	all genes	DE genes	genes overlapping with regions within tad with sig db	DE genes overlapping with regions within tad with sig db	1.02065	0.0332128
cardiomyocyte differentiation	day7 vs day15	60234	2261	1016	33	all genes	DE genes	genes overlapping with regions within sig dc	DE genes overlapping with regions within sig dc	0.865289	0.777
cardiomyocyte differentiation	day7 vs day15	60234	2261	12802	606	all genes	DE genes	genes overlapping with regions AB	DE genes overlapping with regions AB	1.26106	6.60422e-11
cardiomyocyte differentiation	day7 vs day15	60234	2261	265	13	all genes	DE genes	genes overlapping with regions AC	DE genes overlapping with regions AC	1.30689	0.127029
cardiomyocyte differentiation	day7 vs day15	60234	2261	886	26	all genes	DE genes	genes overlapping with regions BC	DE genes overlapping with regions BC	0.781773	0.888341
cardiomyocyte differentiation	day7 vs day80	265912	49040	70046	14952	all regions	regions overlapping DE gene	within 100kb of sig db	within 100kb of sig db overlapping DE gene	1.15745	1.44536e-115
cardiomyocyte differentiation	day7 vs day80	265912	49040	254494	47279	all regions	regions overlapping DE gene	within tad with sig db	within tad with sig db overlapping DE gene	1.00734	1.6663e-18
cardiomyocyte differentiation	day7 vs day80	265912	49040	18910	4773	all regions	regions overlapping DE gene	within sig dc	within sig dc overlapping DE gene	1.36863	1.78728e-128
cardiomyocyte differentiation	day7 vs day80	265912	49040	68984	14667	all regions	regions overlapping DE gene	AB	AB overlapping DE gene	1.15287	6.41605e-107
cardiomyocyte differentiation	day7 vs day80	265912	49040	4879	1254	all regions	regions overlapping DE gene	AC	AC overlapping DE gene	1.39365	4.87984e-37
cardiomyocyte differentiation	day7 vs day80	265912	49040	17518	4278	all regions	regions overlapping DE gene	BC	BC overlapping DE gene	1.32417	7.00185e-93
cardiomyocyte differentiation	day7 vs day80	60234	6175	17778	2426	all genes	DE genes	genes overlapping with regions within 100kb of sig db	DE genes overlapping with regions within 100kb of sig db	1.33111	6.68355e-68
cardiomyocyte differentiation	day7 vs day80	60234	6175	49112	5257	all genes	DE genes	genes overlapping with regions within tad with sig db	DE genes overlapping with regions within tad with sig db	1.04413	1.43219e-15
cardiomyocyte differentiation	day7 vs day80	60234	6175	3182	362	all genes	DE genes	genes overlapping with regions within sig dc	DE genes overlapping with regions within sig dc	1.10972	0.0156178
cardiomyocyte differentiation	day7 vs day80	60234	6175	17432	2369	all genes	DE genes	genes overlapping with regions AB	DE genes overlapping with regions AB	1.32563	5.62715e-64
cardiomyocyte differentiation	day7 vs day80	60234	6175	1128	170	all genes	DE genes	genes overlapping with regions AC	DE genes overlapping with regions AC	1.47009	1.40441e-07
cardiomyocyte differentiation	day7 vs day80	60234	6175	2923	334	all genes	DE genes	genes overlapping with regions BC	DE genes overlapping with regions BC	1.11461	0.0157106
