# Supplementary material for: Examining the dynamics of three-dimensional genome organization with multitask matrix factorization
Source: HighWire-hosted journal article supplement (doi:10.1101/gr.279930.124), 2025-03-20
Supplement: Supplemental_Tables.zip [file Supplemental_Table_S8.xlsx]

## Sheet: Legend
Table S8
GO enrichment analysis on cadiomyocyte differentiation dataset. Each entry is the negative log p-value of GO biological processes for two subsets of differentially expressed (DE) genes: DE genes close to sigDB, and DE genes not close to sigDB. Each column is a pair of timepoints used to determine DB and DE genes. Each row is a GO term (only GO terms with p-value $<$ 1e-5 in at least one pair of t…

## Sheet: Table S8
#Table S8: GO enrichment analysis on cadiomyocyte differentiation dataset
#blue entries = -log(adjusted p-value below 1e-5)	DE gene near sigDB													DE gene NOT near sigDB
Gene Onology (GO) biological process	day0 vs 2	day0 vs 5	day0 vs 7	day0 vs 15	day0 vs 80	day2 vs 5	day2 vs 7	day2 vs 15	day2 vs 80	day5 vs 15	day5 vs 80	day7 vs 80	day15 vs 80	day0 vs 2	day0 vs 5	day0 v 7	day0 vs 15	day0 vs 80	day2 vs 5	day2 vs 7	day2 vs 15	day2 vs 80	day5 vs 7	day5 vs 15	day5 vs 80	day7 vs 15	day7 vs 80	day15 vs 80
DNA metabolic process																										14.3
DNA packaging																										11.7
DNA replication			13	13.8			17.5	18.6																16.9
DNA strand elongation			11.7					13.3
DNA strand elongation involved in DNA replication			12.6					12.6
M phase								12.1		13.2														15.2		19.1
M phase of mitotic cell cycle				12.5				14.3		14.2						12.9								14.4		18.2
RNA catabolic process																	11.9							18.4
SRP-dependent cotranslational protein targeting to membrane																								29.2	12.9
actin filament-based process						12.2					13.6
actomyosin structure organization			12.4			11.7
adult heart development				14
anatomical structure development	23.3	22.7	24	13	13.1	21.3	21.9	24.3	23.6		17.7	30.7	14.6	31.6	15.5				51.9	18.2					14.6		24.5	17.9
anatomical structure formation involved in morphogenesis	21.5	15.6	19.8	13.8		11.7	12.9	11.8	16.2										19.1								18.2
anatomical structure morphogenesis	23	20.5	25.2	15.1		15.9	21.9	27.1	25.5	12.8	16.9	15.9	14.6	29.2	12.3				44.6	12.6							21.9
angiogenesis																			12
axon guidance			11.9
biological adhesion	21.8																		18
biological regulation																											15.2
biosynthetic process				13.2
blood circulation																							12
blood coagulation									11.8																		17.9
blood vessel development		12.3																	21.1								17.1
blood vessel morphogenesis																			14.3								11.8
brain development														13
cardiac cell differentiation		12.3	13.7
cardiac chamber development				11.7
cardiac chamber morphogenesis						12.2
cardiac muscle tissue development		13.2	21.3	17.1		15.9	11.7	13
cardiac muscle tissue morphogenesis			14.4	14.9				12.8
cardiac ventricle development				12.6		13.2			13.7
cardiac ventricle morphogenesis			11.8	13.4		16.4			11.7
cardiovascular system development	15.5	22.1	24.2	27.6	12.8	15.8	15.7	22	18.2		13								26.7								24.1	15.2
cell adhesion	21.8																		18
cell communication												12.6		25	16.9				22								14.3	12.4
cell cycle			14.9	19			13.8	17.5									11.7							21.1		19.1
cell cycle phase			13	17.4			12.6	16.5		14							11.8							21.1		19.1
cell cycle process			14.8	19.7			13.8	14.9		14.2														15.7		15.4
cell development	12.4	16.6	16.3			12.8	11.9	18.6	16.9	12.6	20.7	14.7	12.8	13.8					17.5								14.1
cell differentiation	14	13.6	19.9			15.1	14.7	13.8	15.2		13.1	18.3	13.6	23.7					26.8									12.6
cell division																13.4				14	11.7			20.5		16
cell migration																			18.7
cell morphogenesis			14.9					15	12.9					13.3					13.4
cell morphogenesis involved in differentiation			12.1					13.5				11.9	12.8	13.9					15.4
cell motility																			18
cell surface receptor signaling pathway														13.9					15.8
cell-cell signaling																			13.4
cellular biosynthetic process				13.4
cellular component assembly								12
cellular component biogenesis					15.9				16
cellular component biogenesis at cellular level					13.1
cellular component disassembly										13.9							12.4							22.7
cellular component disassembly at cellular level										13.9							12.6							22.9
cellular component morphogenesis			20.5					16.3	15.3					14.3					12.1
cellular component movement												11.9							18.2
cellular component organization			21.6	20.9	21.5		19.9	39.6	29.9	27	26.4	12.6				13.7	19	18.5			15.1			12.8	12.8
cellular component organization at cellular level			15.3	13.8	17.1		13.4	29.4	19	25.1	18.7						18.7	17.9			14.8				11.7
cellular component organization or biogenesis			21.6	20.9	24.5		20.1	38.1	32.3	24.6	25.6				13.8	17.4	19.3	20.1			14.1
cellular component organization or biogenesis at cellular level			15.7	13.9	21.5		14.1	28.4	22.2	23	18					13.4	19.3	20.1			13.7
cellular developmental process	13.4	16.2	21.3			14	13.8	14.6	16.1		12.8	15.7	12.2	24.7					25.3
cellular macromolecular complex disassembly										16.6							14.2							34.4	16.9
cellular macromolecular complex subunit organization										15.5
cellular macromolecule metabolic process				11.7														12.9
cellular metabolic process				12.7													12.3	16.6
cellular nitrogen compound metabolic process				14.1
cellular process		13.7	19.8	22.8	30.8			21	29.9	13.8	14.8				25.8	35	29.1	23.4		20.8	20.6	16.3		14.5	22.5		17.2
cellular process involved in reproduction																								12.6
cellular protein complex disassembly										14.5							18.2				12.1			37.6	18.5
cellular response to chemical stimulus																			14.9
cellular response to stimulus												13		15.9	11.8				14.2
central nervous system development												11.9		17.6
chordate embryonic development			14.4
circulatory system development	15.5	22.1	24.2	27.6	12.8	15.8	15.7	22	18.2		13								26.7								24.1	15.2
circulatory system process																							12
coagulation									11.8																		17.9
collagen fibril organization																			14
cotranslational protein targeting to membrane																								29	12.8
cytoskeleton organization								13.7
developmental process	21	21.8	21.3			17.9	20.8	18.5	18.3		14	27		28.7					51.3	14.2					12.4		20.1	13.8
embryo development		12.3				12.8
embryo development ending in birth or egg hatching			14.4
embryonic morphogenesis				12.7
enzyme linked receptor protein signaling pathway									11.7					13.6
establishment of protein localization in endoplasmic reticulum																								29	12.8
establishment of protein localization to organelle																								12.1
extracellular matrix organization																			12.3
extracellular structure organization																			12.1
eye development																			12.1
forebrain development												14.4
generation of neurons			12.5				12	19.4	13		13.9	17.3	13.1	22.6					21.3
heart development	11.7	18.6	24.9	32.5		18.8	14.2	27.2	22.2										12.1								18.2
heart morphogenesis		15.1	19.7	20		15.9		13.9	11.7
hemostasis																											18.6
interphase				12.7
interphase of mitotic cell cycle				12.7
localization									13.6																12.7			14.7
localization of cell																			18
locomotion														13.6					18.7								14.1
mRNA catabolic process																	15.3							20.1
mRNA metabolic process																	18.7	17.2
macromolecular complex disassembly										16.5							13.9							34.1	16.6
macromolecular complex subunit organization				11.8	13.9			14.6	12.5	16.6	15.1						11.7							12.4
mitosis				12				14.3		14						13.1								14.4		18
mitotic cell cycle			14.1	22.8			13.4	19.1		14.8						12.4	12							22.9		19.4
multicellular organismal development	23.7	20.8	22.7	12.6		22.1	21.2	21	18.9		15.3	30.7	12.8	31.7	13.8				53.2	14					14		23.8	16.6
multicellular organismal process	23.7	16.6	17.5			24.8	21.1	16.9	15.6		16.3	28.8	15.7	35.5	11.8				51.7	18.2							25.4	19.4
muscle cell development			11.6								11.6
muscle cell differentiation		14.1	13.2			13.6					13.6
muscle contraction			11.8			12.5																	18.1
muscle organ development		12.3	14.5			15.9	12.8	11.7																			13.6
muscle organ morphogenesis				13.8				12.4
muscle structure development		18.8	18.9	15.1		19.1	14	12.4	13.4		18.4												13.3				16.5
muscle system process			12.3		12.3	13.1																	16.5
muscle tissue development		20.3	18.3	13.1		15.9
muscle tissue morphogenesis			12.2	13.9				12.2
myofibril assembly			14.4			15
negative regulation of biological process			11.9	13.3										17.1	11.5				18.5								20.9	12
negative regulation of cell communication																			13
negative regulation of cellular macromolecule biosynthetic process				13.4
negative regulation of cellular metabolic process				12.4
negative regulation of cellular process			13	13.9										15.2	11.9		11.7		17.6								17.2
negative regulation of gene expression				12.6
negative regulation of macromolecule biosynthetic process				13.2
negative regulation of macromolecule metabolic process				13.8
negative regulation of metabolic process				13
negative regulation of nitrogen compound metabolic process				12
negative regulation of nucleobase-containing compound metabolic process				12.4
negative regulation of response to stimulus																			16.1
negative regulation of signal transduction																			13
negative regulation of signaling																			12.3
negative regulation of transcription from RNA polymerase II promoter				13.9
negative regulation of transcription, DNA-dependent				12.6
nervous system development		13.6	17.8		12.7	15	17	21.8	17.3		17.9	29	14.6	37.3					31.1								14.7	12
neurogenesis			14.4				12.5	18.4	14.7		14.1	18.5	14.6	26					24.1
neuron development												11.5		12.2					12
neuron differentiation								14.1			13.3	13.6	13.6	17.9					16.7
neuron projection development														12.6
nitrogen compound metabolic process				14
nuclear division				12				14.3		14						13.1								14.4		18
nuclear-transcribed mRNA catabolic process																	15.9							20.9
nuclear-transcribed mRNA catabolic process, nonsense-mediated decay																	16.3				11.7			26.8	13.7
nucleobase-containing compound metabolic process				13.5
organ development	20.7	16.1	16.3	11.9		13.3	16.1	14.7	19			17.2		17.5					34								16.2	15.9
organ morphogenesis	13.5	11.6	11.8	13.9		11.6	14.7	16.7	11.8					12.4					14.7
organelle fission				12				13.4		14.4						13.4								12.6		17
organelle organization								16.4		15.2								13
phosphate-containing compound metabolic process																						12.8			17.6		12
phosphorus metabolic process																						12.8			17.6		12
phosphorylation																									15.1
positive regulation of RNA metabolic process									11.6
positive regulation of biological process									12.5										13.2								11.6
positive regulation of catalytic activity									11.8
positive regulation of cell communication																			12.7
positive regulation of cell differentiation						12.1
positive regulation of cellular metabolic process									14.2
positive regulation of cellular process			15.4						18.8		12.8	11.7		12.4	12.3				18								12.9
positive regulation of developmental process	13.7	13.4	14.4			13.8													13.5								14.9	17.3
positive regulation of gene expression				13.2					12.6
positive regulation of macromolecule biosynthetic process									11.7
positive regulation of macromolecule metabolic process									16.6
positive regulation of metabolic process									14.7
positive regulation of molecular function			14.4						15.7
positive regulation of nitrogen compound metabolic process									12
positive regulation of nucleobase-containing compound metabolic process									13
positive regulation of signal transduction																			13
positive regulation of signaling																			13.3
positive regulation of transcription, DNA-dependent				11.7					12.1
protein complex disassembly										14.4							17.8				11.9			37.2	18.2
protein complex subunit organization								11.7		12.8	12.1						11.6							15.8
protein localization in endoplasmic reticulum																								25.7
protein targeting to ER																								29	12.8
protein targeting to membrane																								19.1
protein-DNA complex subunit organization										11.9
regulation of anatomical structure morphogenesis	11.7													15.2					20.7
regulation of biological quality		12.3	11.9			12.6	12.5	20.7	15.9										15.4								21.6	13.8
regulation of body fluid levels																											19.6
regulation of canonical Wnt receptor signaling pathway																			13.2
regulation of catalytic activity			13.7	13.6	13.9
regulation of cell adhesion																			13.2
regulation of cell communication			13.1						11.8			14.6		16.7					22.7								13.2
regulation of cell cycle			12.8	12.1
regulation of cell death			12.4
regulation of cell development			15.8																18.8
regulation of cell differentiation	14.5		11.5			11.6								13.1					13.7								14.5	15.2
regulation of cell morphogenesis involved in differentiation																			13.1
regulation of cell proliferation																			17.5
regulation of cellular component organization			14.5		13.1		13.4	13.6	13		14.9																13.3
regulation of cellular macromolecule biosynthetic process				12
regulation of cellular metabolic process				13.8
regulation of cellular process									11.8			13.3		11.5	13.6												13.2
regulation of developmental process	20.1		12.9			11.7					11.6		11.6	17.3					17.1								22.8	22.3
regulation of epithelial cell proliferation																			12.5
regulation of heart contraction						18.8
regulation of localization	12.1		14.3																13.2
regulation of locomotion	11.6
regulation of macromolecule biosynthetic process				11.7
regulation of macromolecule metabolic process				13.9
regulation of metabolic process				15.2
regulation of molecular function			21.6	19.5	21.9				15.5
regulation of multicellular organismal development	13.7		14.6											16.3					20.5								16.6	17.9
regulation of multicellular organismal process	15.1	15.2	19.6			19			14.3					14.6					21.7								24.5	22.7
regulation of muscle organ development			14.4
regulation of nervous system development																			11.5
regulation of neurogenesis																			11.8
regulation of neuron differentiation																			12.1
regulation of phosphorylation									11.8			12
regulation of primary metabolic process				13.2
regulation of protein phosphorylation									11.8
regulation of response to stimulus														12.4					12
regulation of response to stress																											11.6
regulation of signal transduction									14.4		13.1	14.6	14.6	19.1					18								16	11.5
regulation of signaling					13.9				19.3		14.8	18.6	14.6	24.2	11.5				20.8								17.8	12.6
regulation of striated muscle tissue development			14.8
regulation of system process			14.8		11.8	13.9
regulation of transcription from RNA polymerase II promoter				15.6					13
regulation of transport					13.1
regulation of wound healing																											13.1
response to chemical stimulus														11.6					22								14.3	12.4
response to endogenous stimulus																			12.7									16.5
response to organic substance																			14.7									12.1
response to steroid hormone stimulus																			11.8
response to stimulus												12.6							11.9
response to wounding																											14.5
ribonucleoprotein complex biogenesis					12.1
sensory organ development																			12.3
signal transduction												12	11.7	17.6					13.2
signaling												13.8	12.3	25.6	17.6				21.6								14
sister chromatid segregation																										11.9
striated muscle cell development			13			13
striated muscle cell differentiation		12.5	13																				11.6
striated muscle tissue development		18.6	18	12.5		17.2
system development	24.9	22.1	24.9	14.3	14.7	20.7	21.9	26.5	23.6		17.8	38	15.7	35.5	17.2				57.4	20	11.7	12.8			16.9		25.4	22.7
tissue development	16.7	12.9				13.1													16.3
tissue morphogenesis				13.2			12.5		13.5
translational elongation																	15				11.7			35.2	14.6
translational initiation																	12.9							25.4	11.8
translational termination										13.7							18.2				14.7			38.3	18.9
tube development									16.2
tube morphogenesis																											11.5
vasculature development																			22								17
ventricular cardiac muscle tissue development				11.9
viral genome expression										13.9							17.7				14.8			37.9	19.2
viral infectious cycle																	13.4							28.6	12.3
viral reproduction																	12.4
viral reproductive process																	13.9							22.9	13.1
viral transcription										13.9							17.7				14.8			37.9	19.2
wound healing											11.6																21.9
