# Supplementary material for: Examining the dynamics of three-dimensional genome organization with multitask matrix factorization
Source: HighWire-hosted journal article supplement (doi:10.1101/gr.279930.124), 2025-03-20
Supplement: Supplemental_Tables.zip [file Supplemental_Table_S9.xlsx]

## Sheet: Legend
Table S9
GO enrichment analysis on H1-endoderm dataset. Each entry is the negative log p-value of GO biological processes for two subsets of differentially expressed (DE) genes: DE genes close to sigDB, and DE genes not close to sigDB. Each column is a pair of timepoints used to determine DB and DE genes. Each row is a GO term (only GO terms with p-value $<$ 1e-5 in at least one pair of timepoints is list…

## Sheet: Table S9
#Table S9: GO enrichment analysis on H1-endoderm dataset; blue entries = -log(adjusted p-value below 1e-5)
Gene Onology (GO) biological process	H1 vs endoderm: DE gene NOT near sigDB	H1 vs endoderm: DE gene near sigDB
anatomical structure development	13.2	12.5
anatomical structure morphogenesis		20
biological regulation	14.1
biosynthetic process	15.3
cardiovascular system development		18
cell communication		12.6
cell development		11.8
cell differentiation		12.5
cell morphogenesis		13.3
cell morphogenesis involved in differentiation		15.3
cell morphogenesis involved in neuron differentiation		11.8
cell projection morphogenesis		12.2
cell projection organization		15.1
cellular biosynthetic process	15.4
cellular component morphogenesis		11.6
cellular component organization	17.1	29.7
cellular component organization at cellular level		32.5
cellular component organization or biogenesis	15.6	31.1
cellular component organization or biogenesis at cellular level		33.7
cellular developmental process		11.6
cellular macromolecule biosynthetic process	15.7
cellular macromolecule metabolic process	27.2
cellular metabolic process	25.4
cellular process	58.9	28.3
cellular protein metabolic process	18.4
cellular protein modification process	12.8
circulatory system development		18
developmental process		11.7
establishment of protein localization	14.8
gene expression	16.4
generation of neurons	11.6	17.2
localization	12.2
locomotion		11.8
macromolecule biosynthetic process	15.8
macromolecule localization	11.8
macromolecule metabolic process	13
macromolecule modification	13.2
mitotic cell cycle		11.8
multicellular organismal development	11.7	12.6
negative regulation of biological process	17.9
negative regulation of cellular process	19.3	11.8
negative regulation of response to stimulus		11.8
nervous system development	19.6	16.9
neurogenesis		17.2
neuron development		11.7
neuron differentiation		13.1
neuron projection development		12.7
neuron projection morphogenesis		12.8
organ development		14
organelle organization		12.4
positive regulation of catalytic activity		12.3
positive regulation of cellular process		16.9
positive regulation of molecular function		11.7
protein localization	13
protein modification process	12.8
protein transport	14.6
regulation of catalytic activity		15.9
regulation of cell communication	16.2
regulation of cellular component organization		15.4
regulation of cellular metabolic process	16
regulation of cellular process	18.9	18.5
regulation of developmental process		12.8
regulation of metabolic process	14.8
regulation of molecular function		16.8
regulation of phosphate metabolic process		12.6
regulation of phosphorus metabolic process		12.6
regulation of primary metabolic process	14.8
regulation of signal transduction	14.1	17.7
regulation of signaling	16.3	17.7
signaling		12.8
system development		16.9
viral infectious cycle	12.3
viral reproductive process	12.4
