# Supplementary material for: Examining the dynamics of three-dimensional genome organization with multitask matrix factorization
Source: HighWire-hosted journal article supplement (doi:10.1101/gr.279930.124), 2025-03-20
Supplement: Supplemental_Tables.zip [file Supplemental_Table_S10.xlsx]

## Sheet: Legend
Table S10
GO enrichment analysis on mouse neural differentiation dataset. Each entry is the negative log p-value of GO biological processes for two subsets of differentially expressed (DE) genes: DE genes close to sigDB, and DE genes not close to sigDB. Each column is a pair of timepoints used to determine DB and DE genes. Each row is a GO term (only GO terms with p-value $<$ 1e-5 in at least one pair of t…

## Sheet: Table S10
#Table S10: GO enrichment analysis on mouse neural differentiation dataset
#blue entries = -log(adjusted p-value below 1e-5)	DE gene NOT near DB			DE gene near DB
term	ES vs NPC	ES vs CN	NPC vs CN	ES vs NPC	ES vs CN	NPC vs CN
DNA_repair			11.6
DNA_replication			30.5		13.3
axon_guidance						17
cell_adhesion	13.6		20.7	27.7	13.3
cell_cycle			32.4		12.1	17
cell_differentiation	32.9
cell_division			29
cellular_response_to_leukemia_inhibitory_factor				16.8
homophilic_cell_adhesion_via_plasma_membrane_adhesion_molecules			32.4	36.3	20.5
multicellular_organism_development	33.1			25.8
nervous_system_development	17.8		23.3		14.2
neuron_differentiation	17.6
positive_regulation_of_synapse_assembly	12
positive_regulation_of_transcription_by_RNA_polymerase_II				14.4
rRNA_processing		13.8	29
regulation_of_transcription_by_RNA_polymerase_II	13.1
ribosome_biogenesis			29.6
translation		33.2	53.1		13.3
