# Supplementary figures and images for: Examining the dynamics of three-dimensional genome organization with multitask matrix factorization (part 1 of 2)
Source: HighWire-hosted journal article supplement (doi:10.1101/gr.279930.124), 2025-03-20

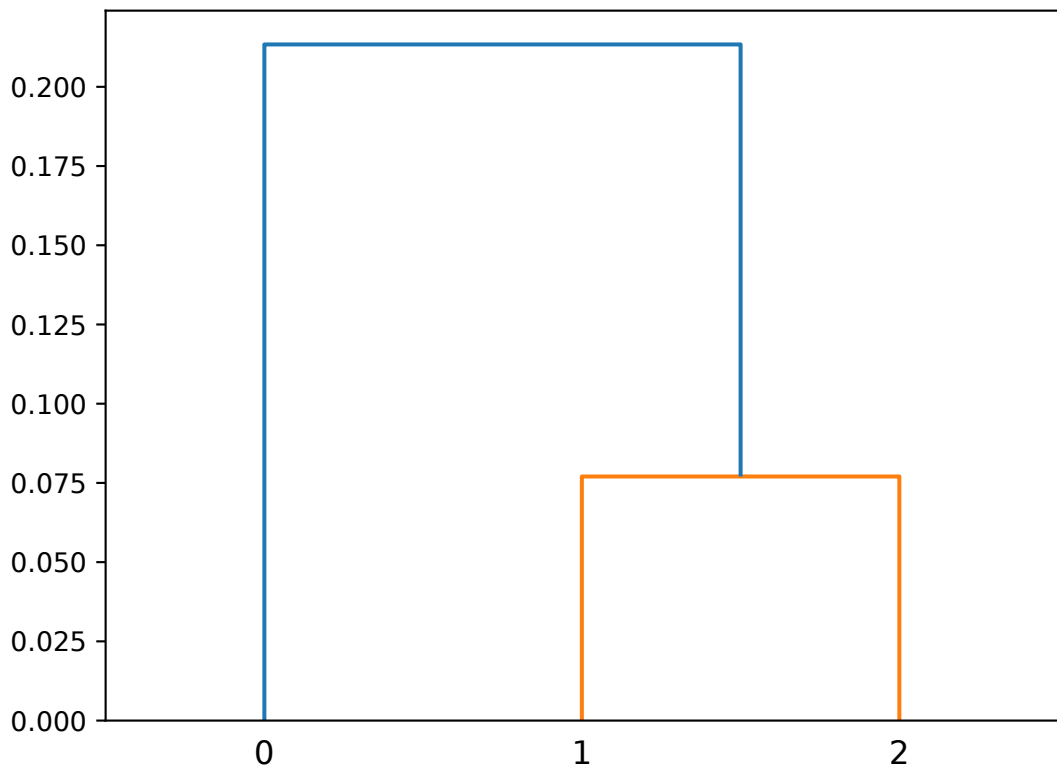

Supplement: Supplemental_Code_S1.zip [file chr19_dendrogram.pdf › tgif-main/suggest_tree/output/chr19_dendrogram.pdf]

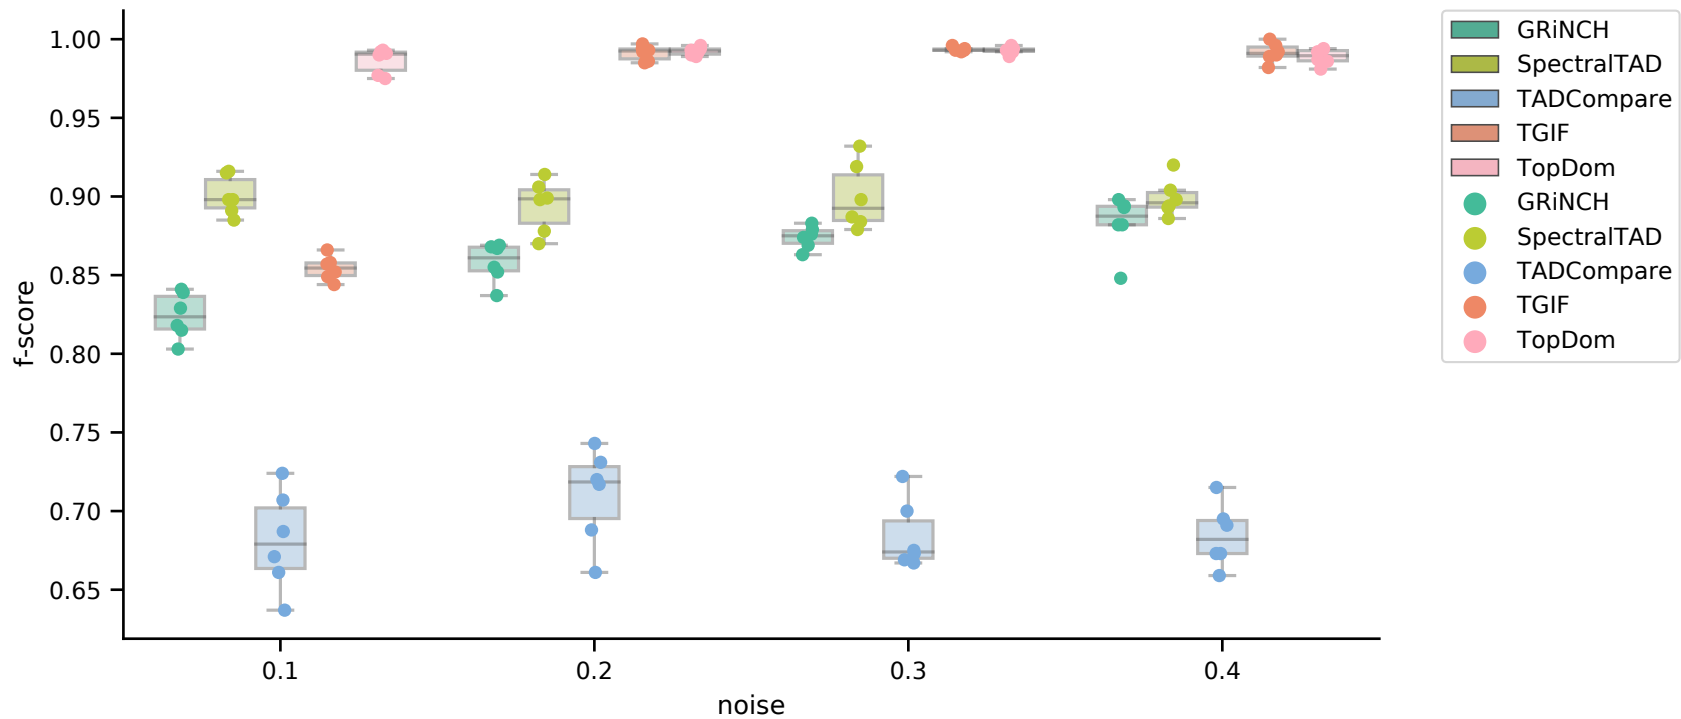

Supplement: Supplemental_Code_S2.tgz.zip [file shared_f-score.pdf › TGIF_evaluation_scripts_by_figure/Fig2A_and_SuppFig3A/shared_f-score.pdf]

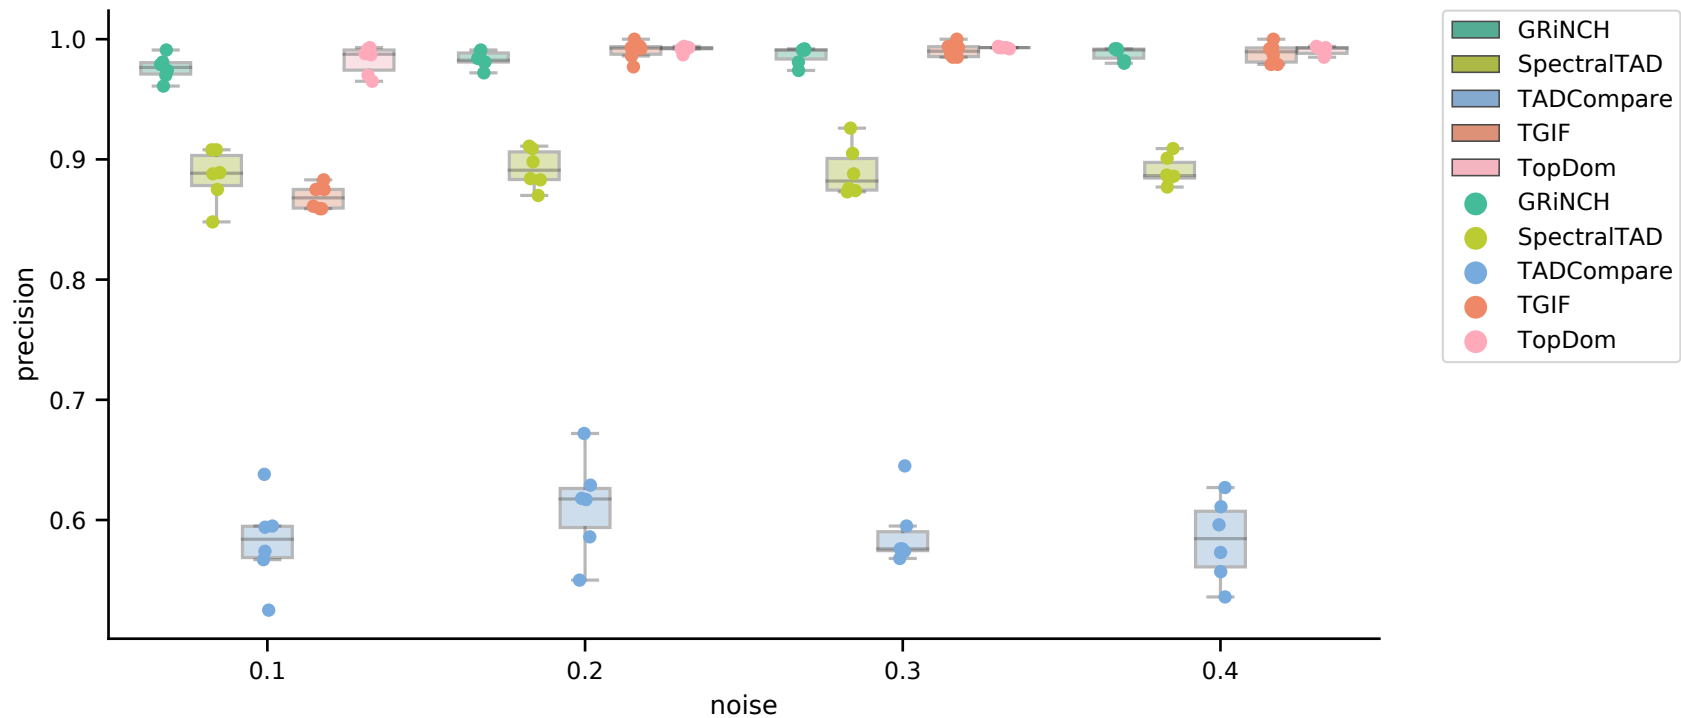

Supplement: Supplemental_Code_S2.tgz.zip [file shared_precision.pdf › TGIF_evaluation_scripts_by_figure/Fig2A_and_SuppFig3A/shared_precision.pdf]

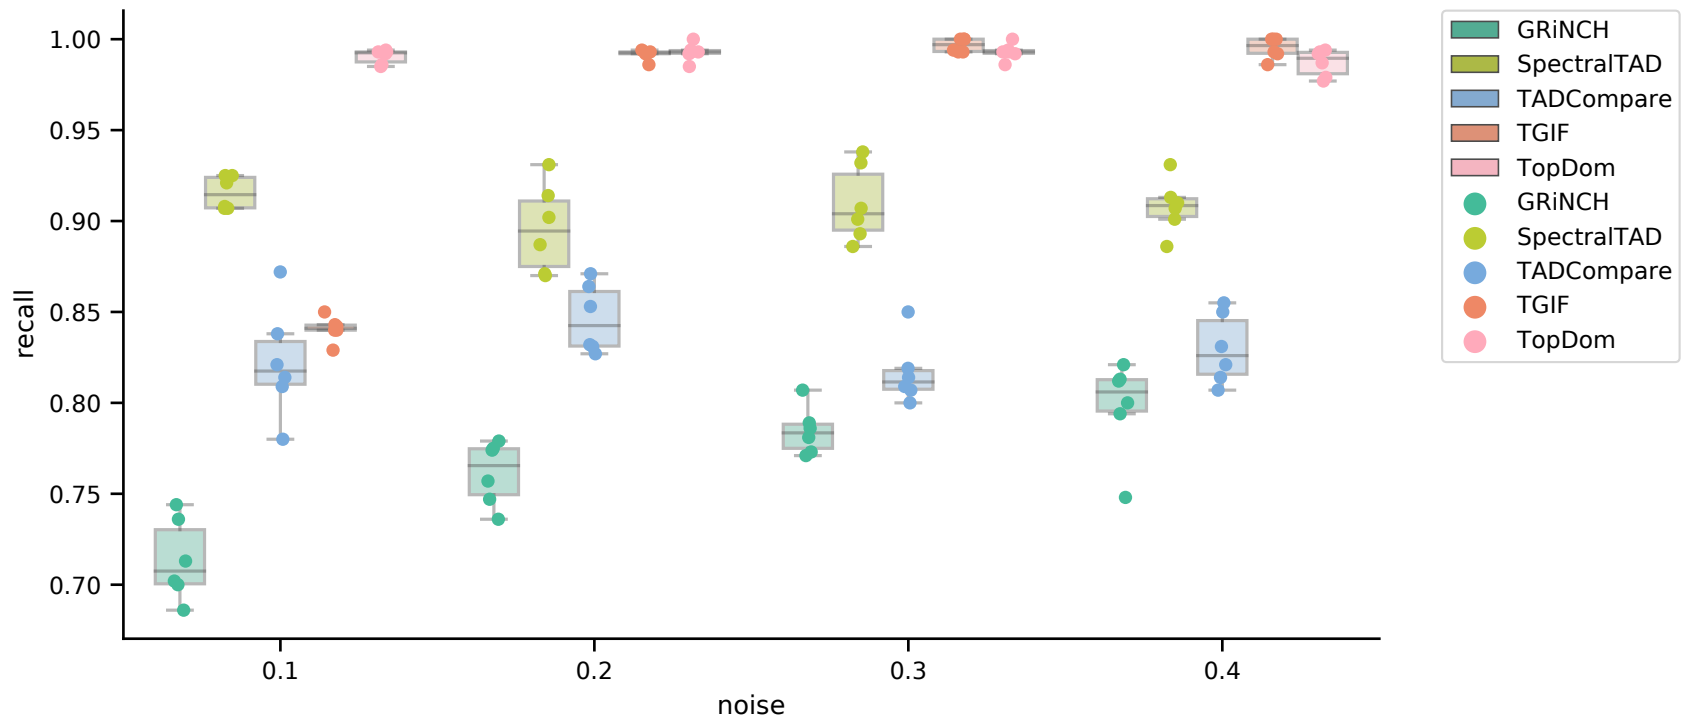

Supplement: Supplemental_Code_S2.tgz.zip [file shared_recall.pdf › TGIF_evaluation_scripts_by_figure/Fig2A_and_SuppFig3A/shared_recall.pdf]

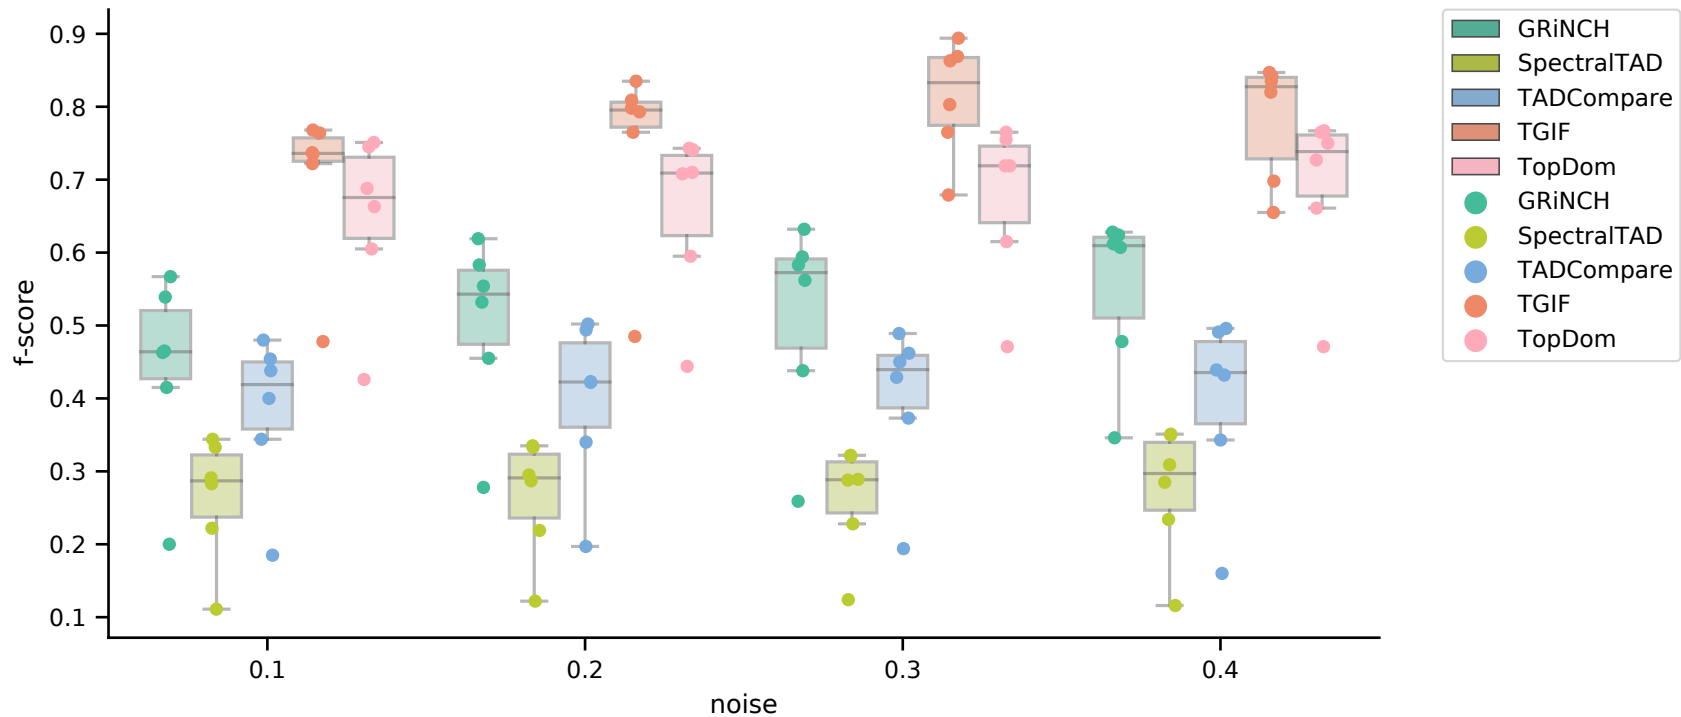

Supplement: Supplemental_Code_S2.tgz.zip [file task-specific_f-score.pdf › TGIF_evaluation_scripts_by_figure/Fig2A_and_SuppFig3A/task-specific_f-score.pdf]

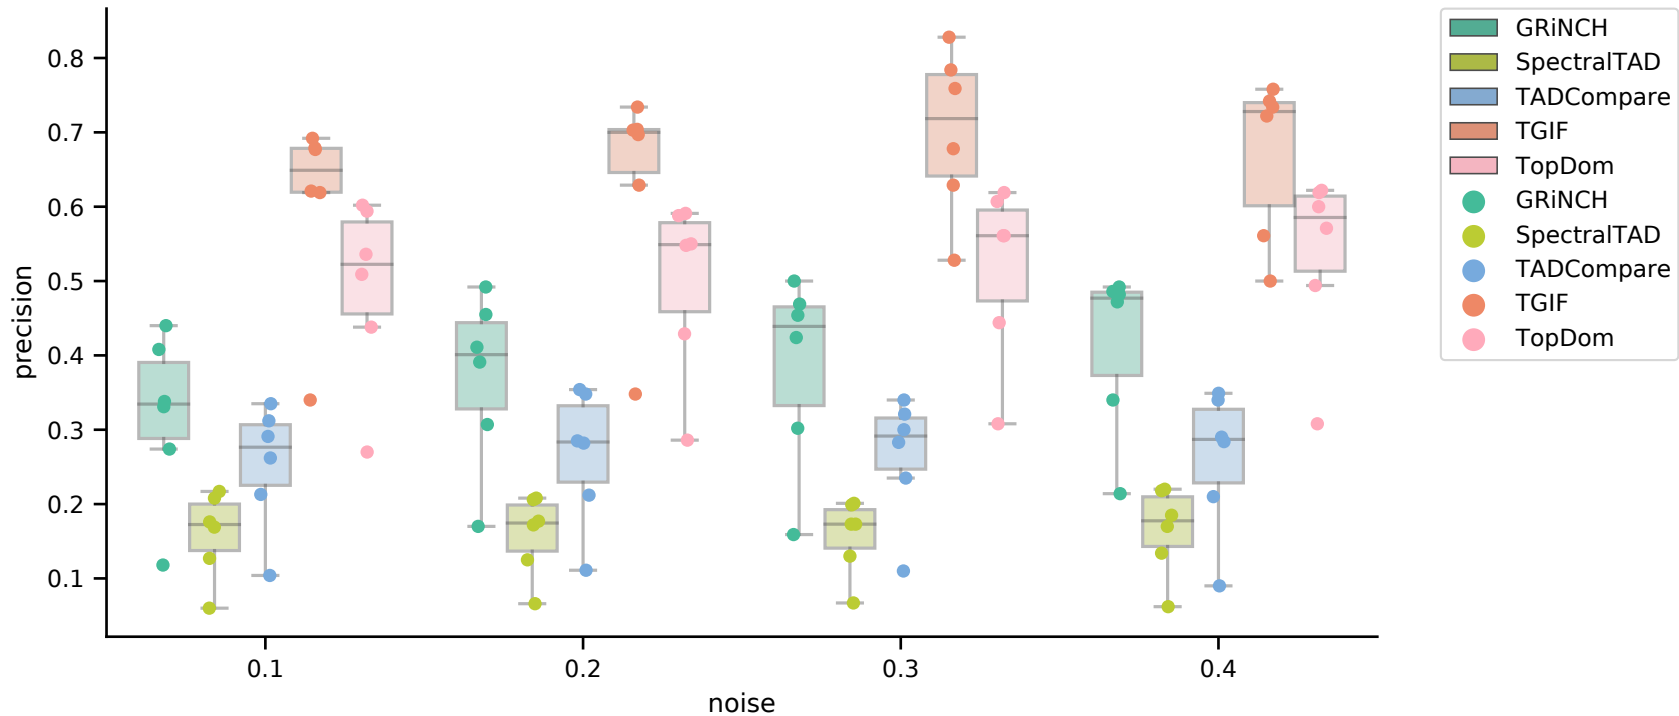

Supplement: Supplemental_Code_S2.tgz.zip [file task-specific_precision.pdf › TGIF_evaluation_scripts_by_figure/Fig2A_and_SuppFig3A/task-specific_precision.pdf]

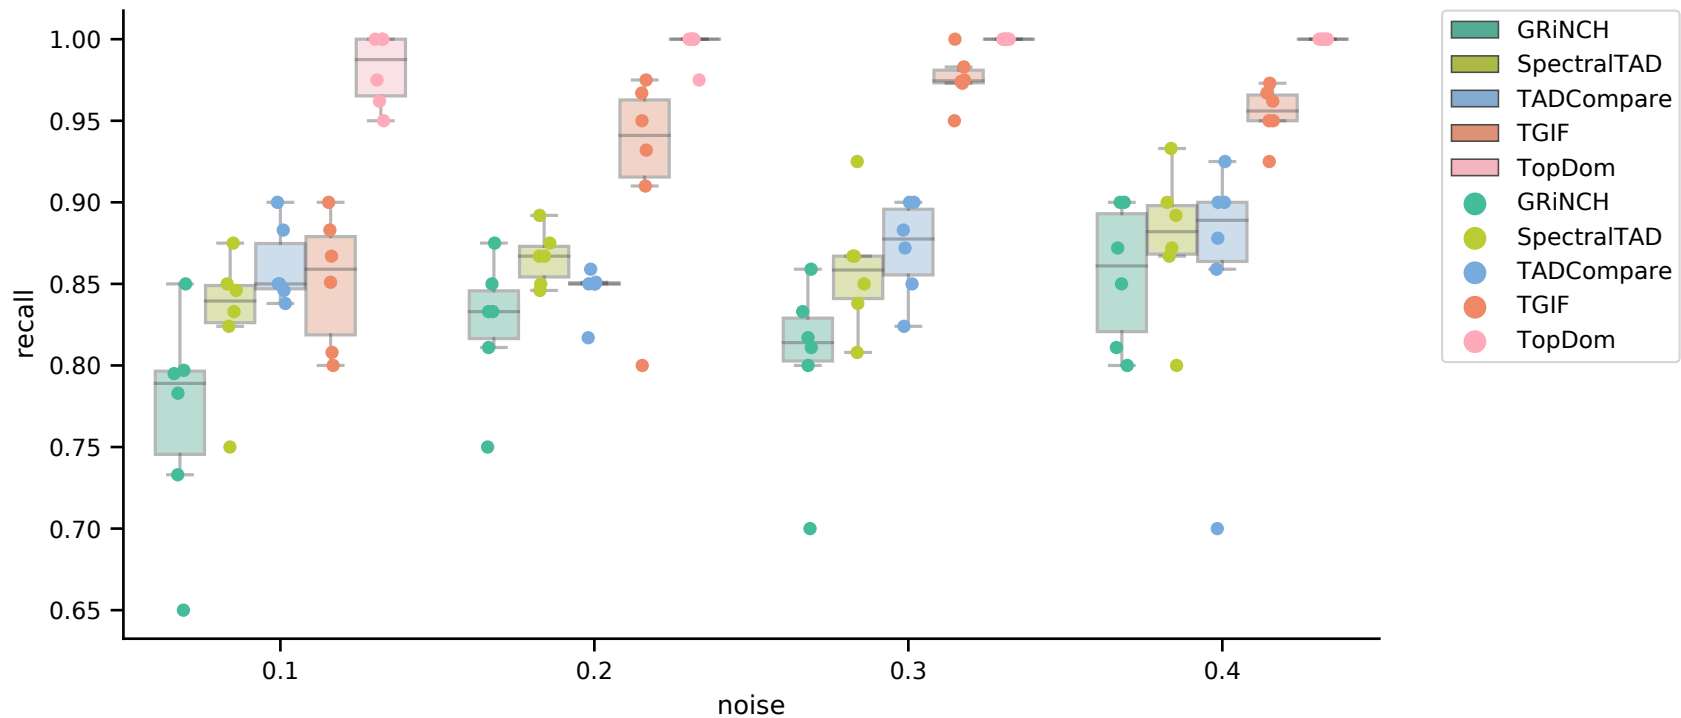

Supplement: Supplemental_Code_S2.tgz.zip [file task-specific_recall.pdf › TGIF_evaluation_scripts_by_figure/Fig2A_and_SuppFig3A/task-specific_recall.pdf]

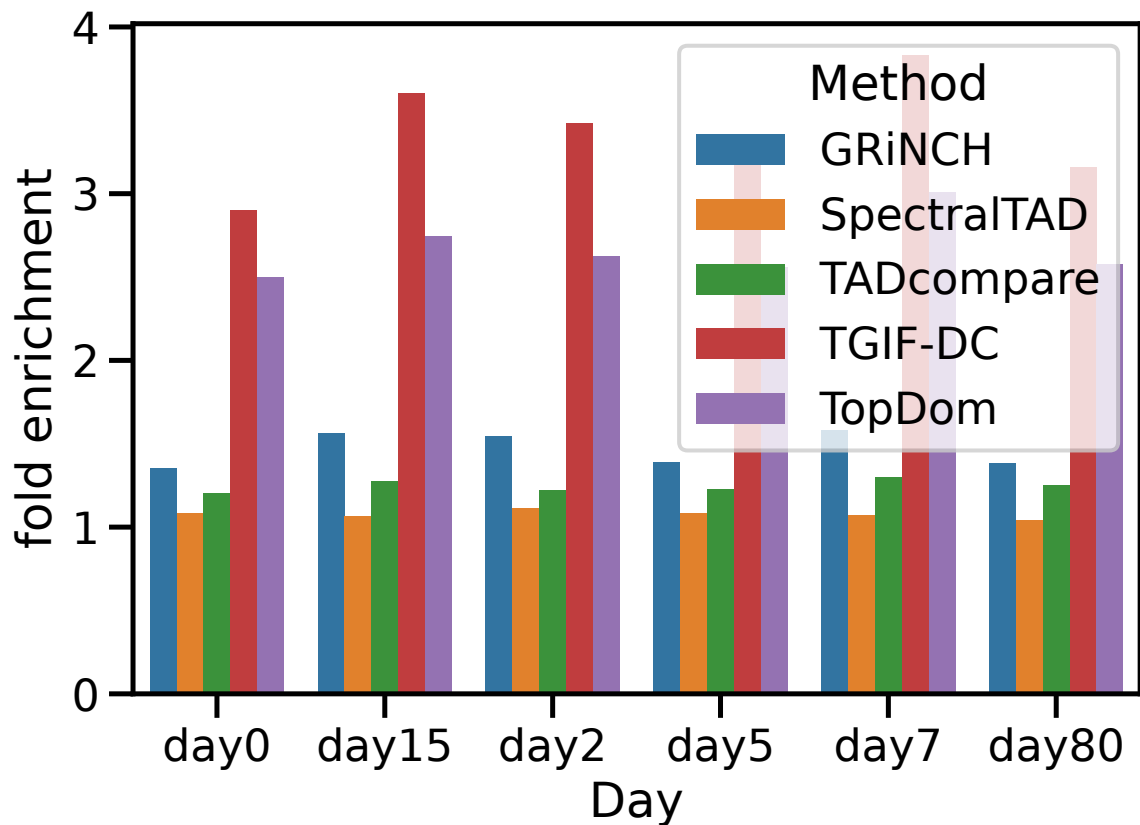

Supplement: Supplemental_Code_S2.tgz.zip [file ctcf_enrichment.pdf › TGIF_evaluation_scripts_by_figure/Fig2B/ctcf_enrichment.pdf]

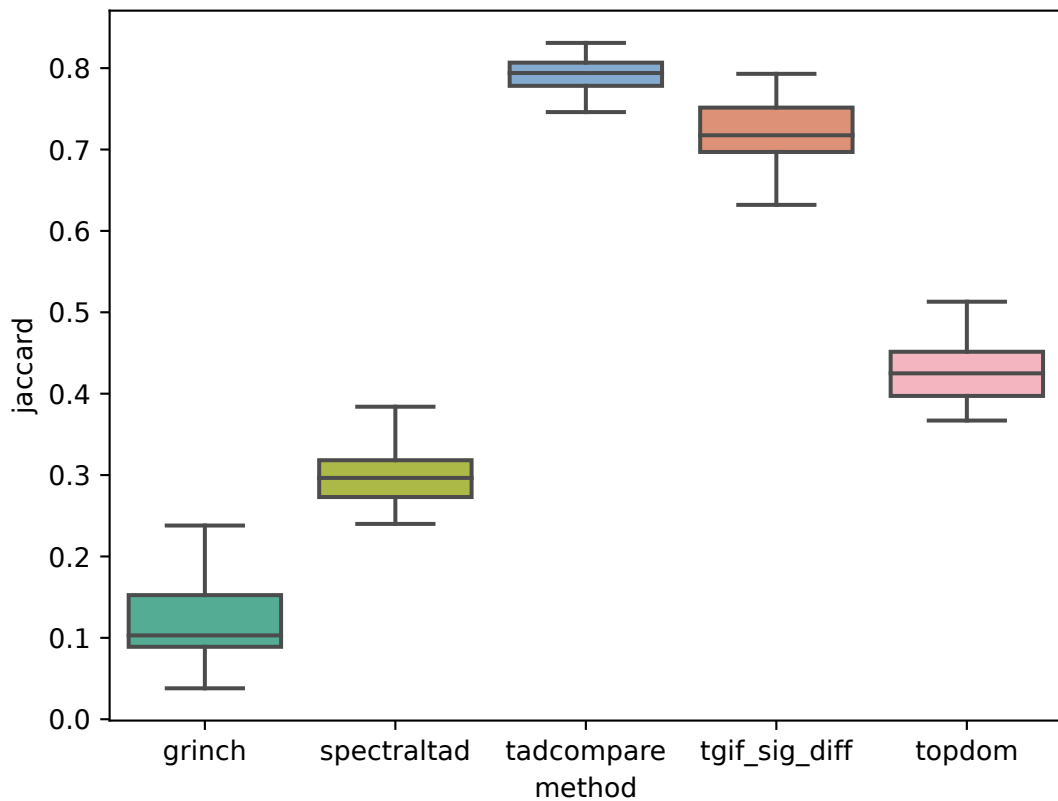

Supplement: Supplemental_Code_S2.tgz.zip [file jaccard_score.pdf › TGIF_evaluation_scripts_by_figure/Fig2C/compile_jaccard/jaccard_score.pdf]

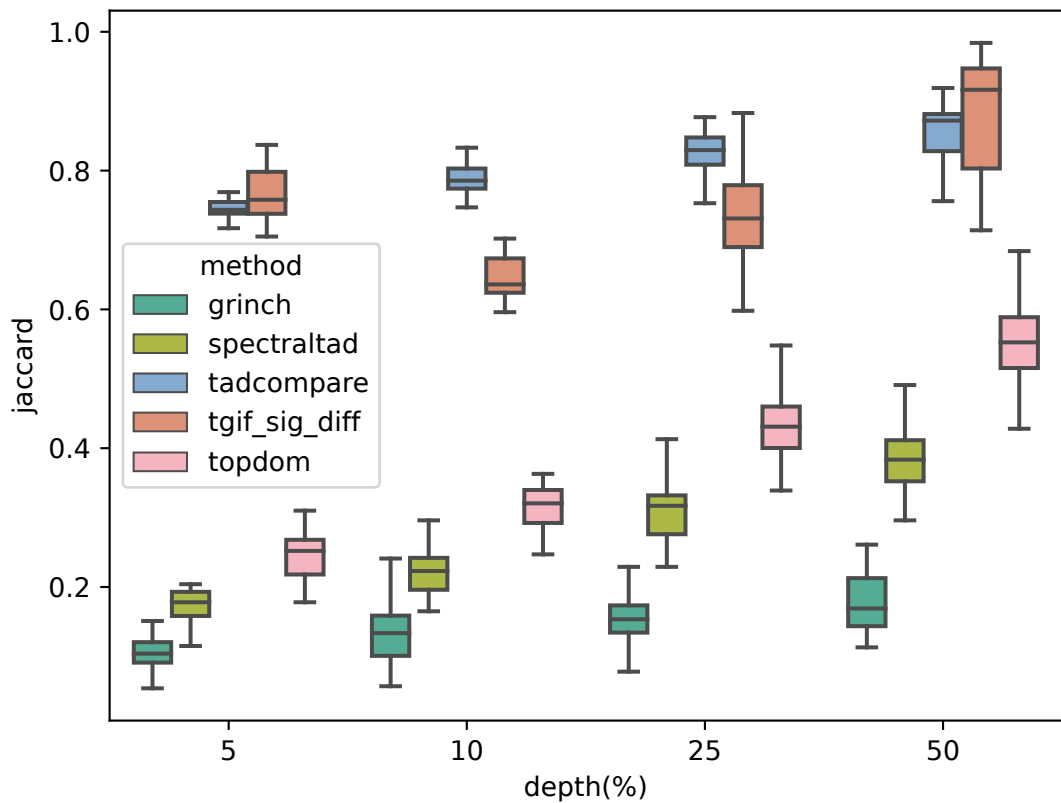

Supplement: Supplemental_Code_S2.tgz.zip [file jaccard_score.pdf › TGIF_evaluation_scripts_by_figure/Fig2D/compile_jaccard/jaccard_score.pdf]

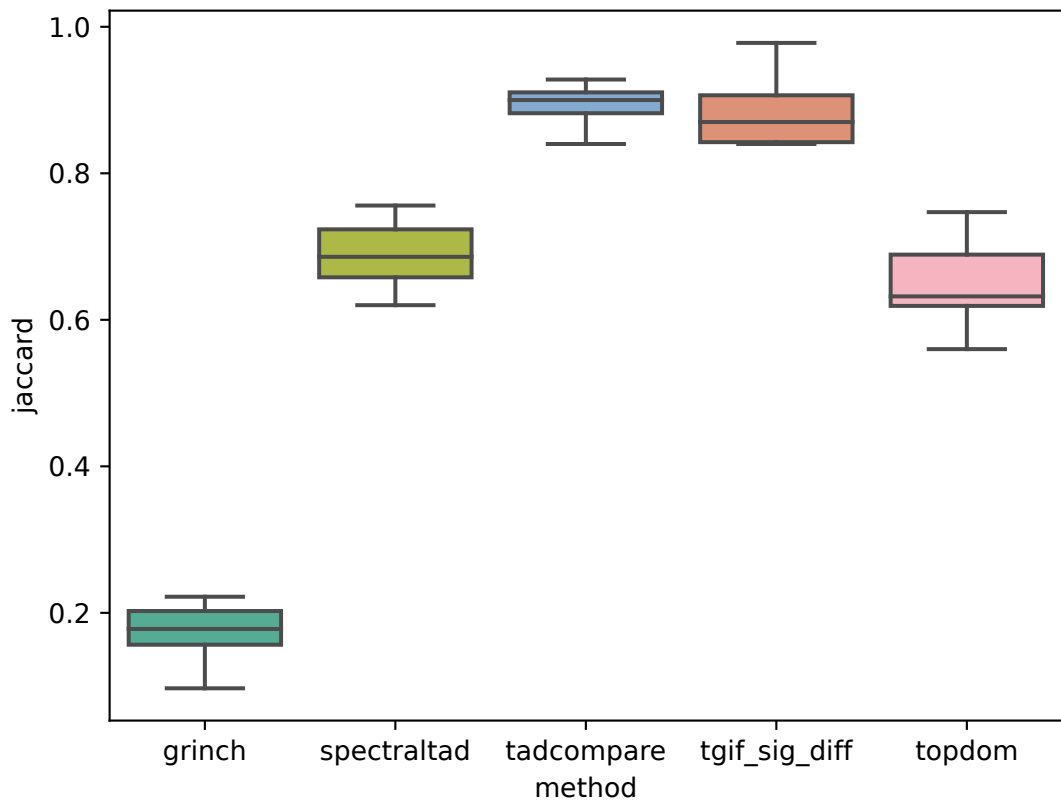

Supplement: Supplemental_Code_S2.tgz.zip [file jaccard_score.pdf › TGIF_evaluation_scripts_by_figure/Fig2E/compile_jaccard/jaccard_score.pdf]

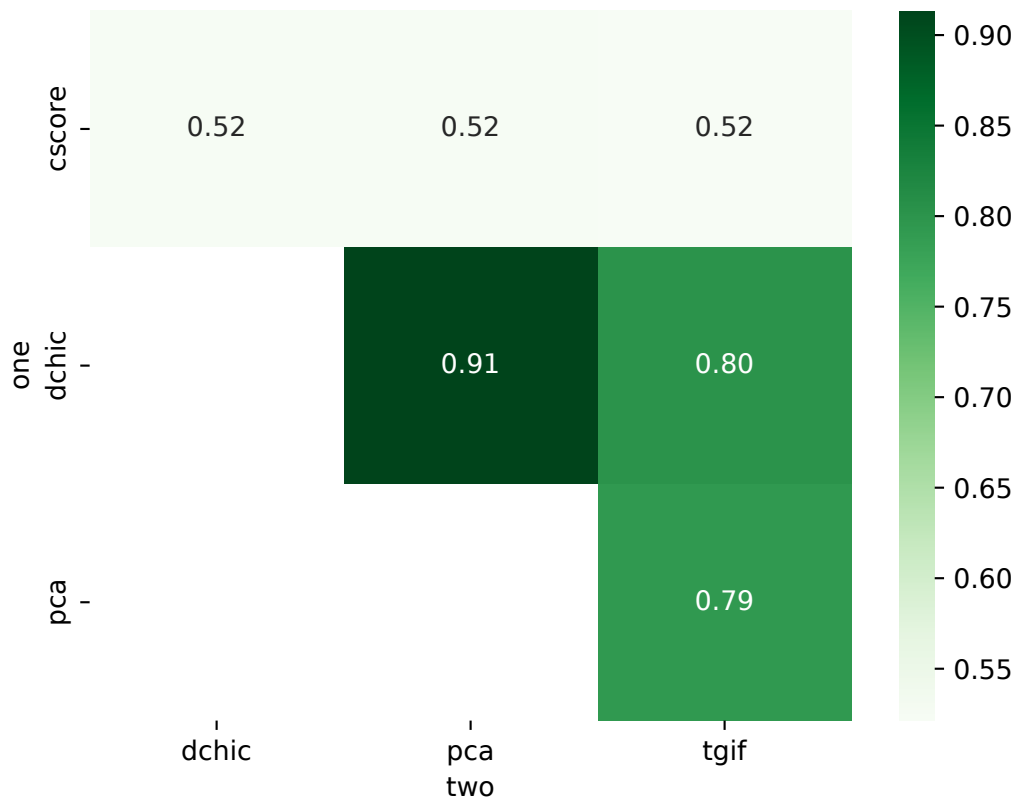

Supplement: Supplemental_Code_S2.tgz.zip [file rand_index.pdf › TGIF_evaluation_scripts_by_figure/Fig3A/rand_index.pdf]

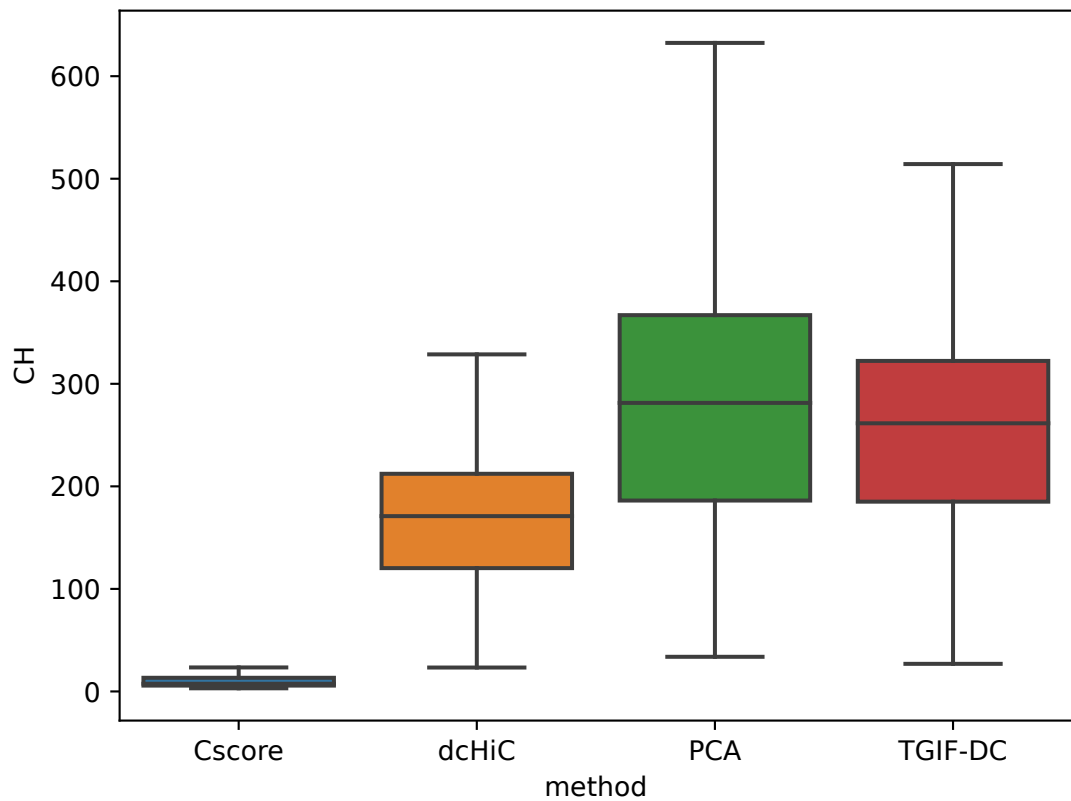

Supplement: Supplemental_Code_S2.tgz.zip [file compartment_quality_oe_CH.pdf › TGIF_evaluation_scripts_by_figure/Fig3B-D/compartment_quality_oe_CH.pdf]

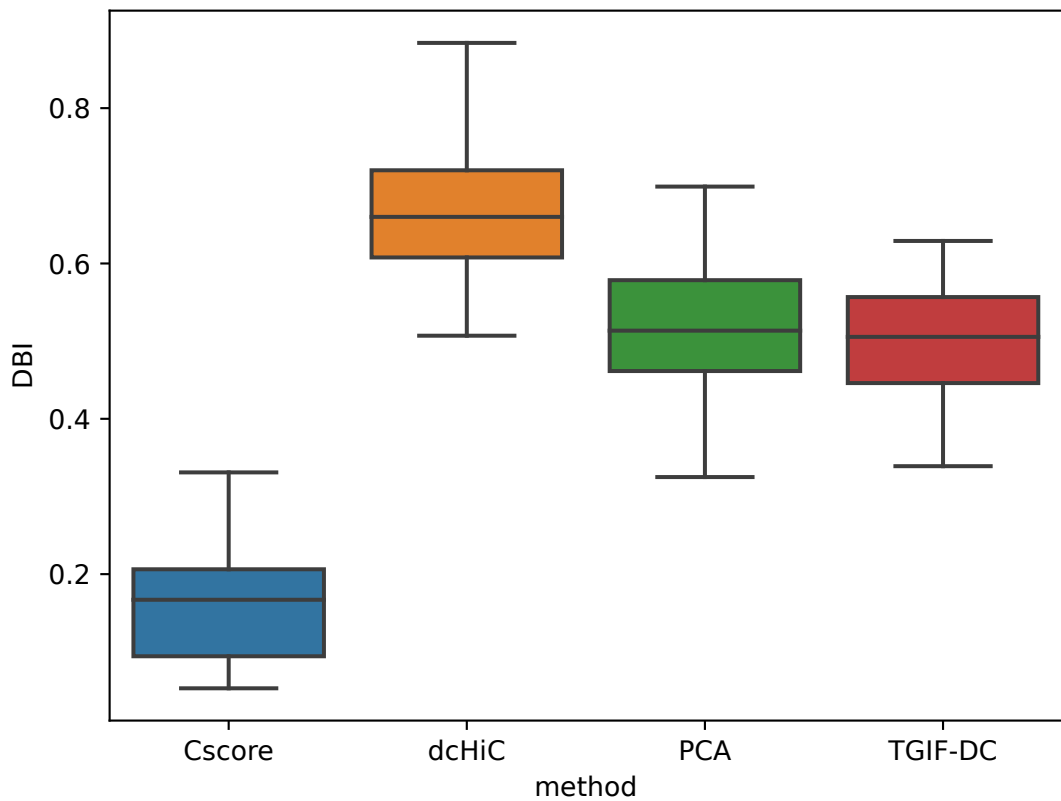

Supplement: Supplemental_Code_S2.tgz.zip [file compartment_quality_oe_DBI.pdf › TGIF_evaluation_scripts_by_figure/Fig3B-D/compartment_quality_oe_DBI.pdf]

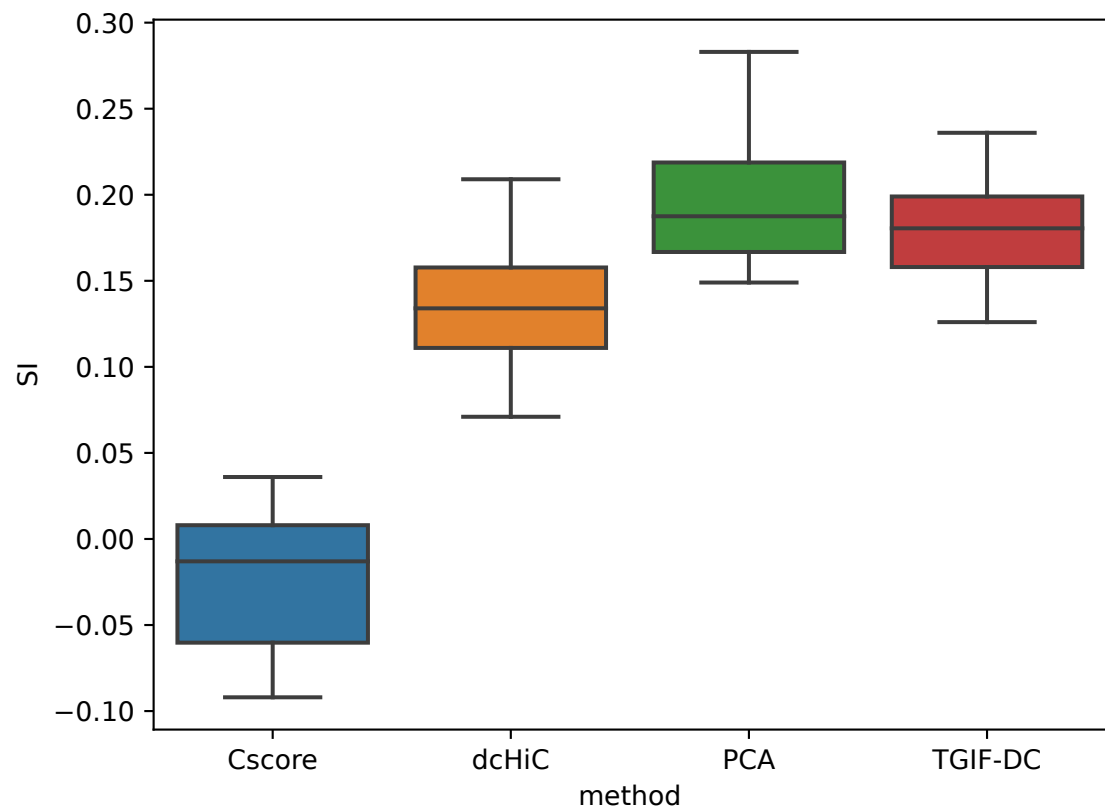

Supplement: Supplemental_Code_S2.tgz.zip [file compartment_quality_oe_SI.pdf › TGIF_evaluation_scripts_by_figure/Fig3B-D/compartment_quality_oe_SI.pdf]

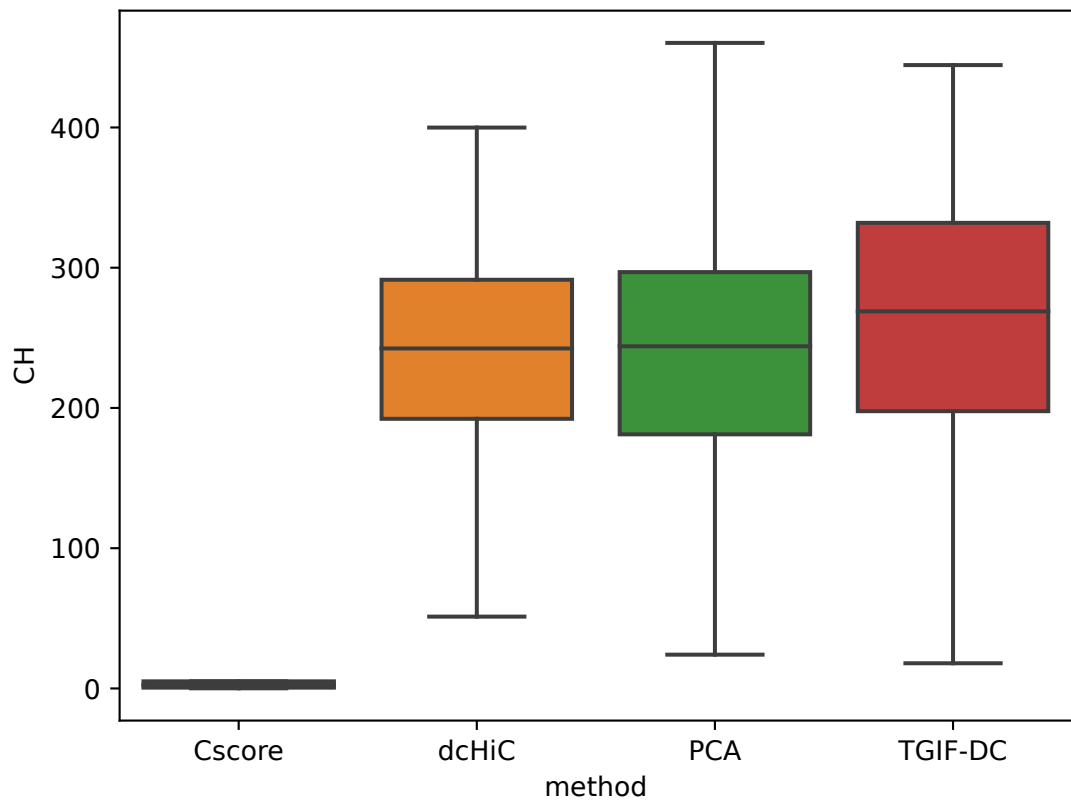

Supplement: Supplemental_Code_S2.tgz.zip [file compartment_quality_accessibility_CH.pdf › TGIF_evaluation_scripts_by_figure/Fig3E-G/compartment_quality_accessibility_CH.pdf]

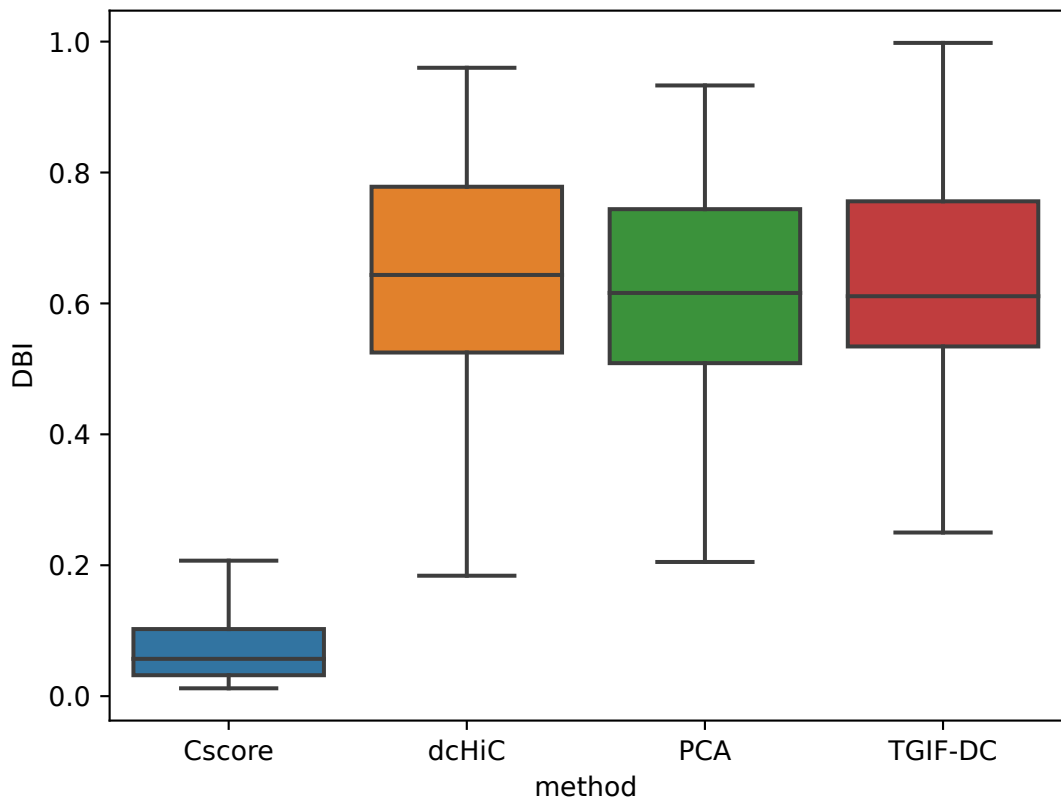

Supplement: Supplemental_Code_S2.tgz.zip [file compartment_quality_accessibility_DBI.pdf › TGIF_evaluation_scripts_by_figure/Fig3E-G/compartment_quality_accessibility_DBI.pdf]

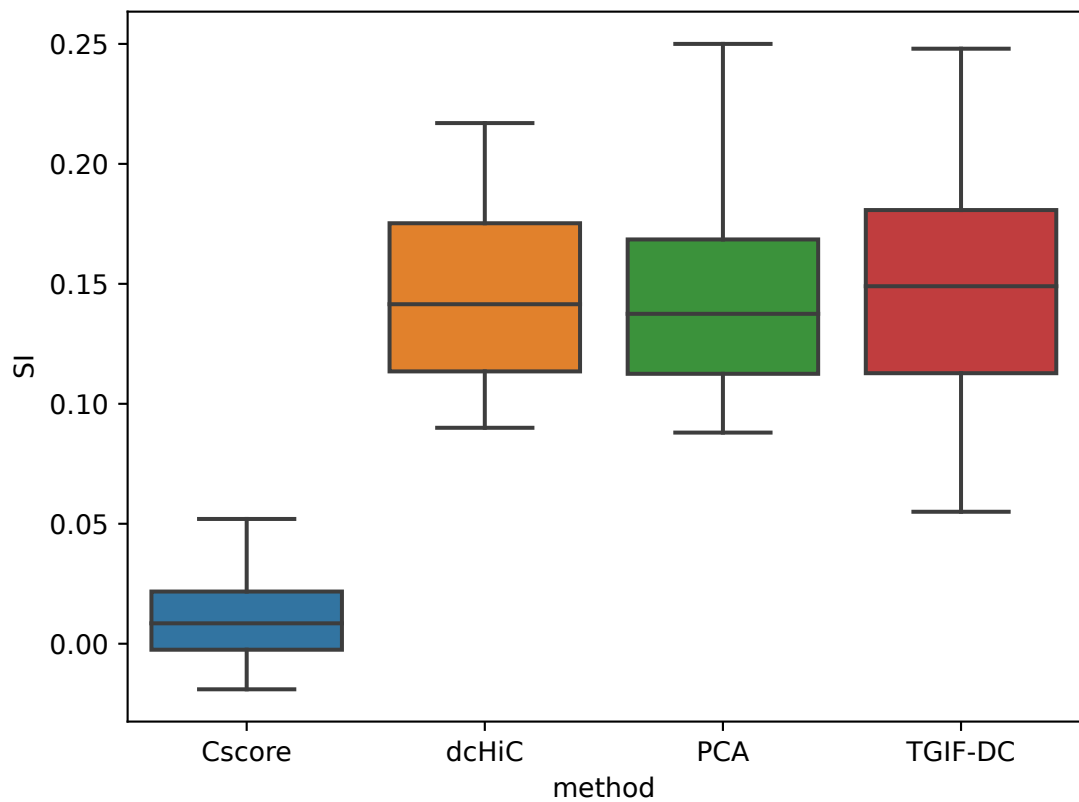

Supplement: Supplemental_Code_S2.tgz.zip [file compartment_quality_accessibility_SI.pdf › TGIF_evaluation_scripts_by_figure/Fig3E-G/compartment_quality_accessibility_SI.pdf]

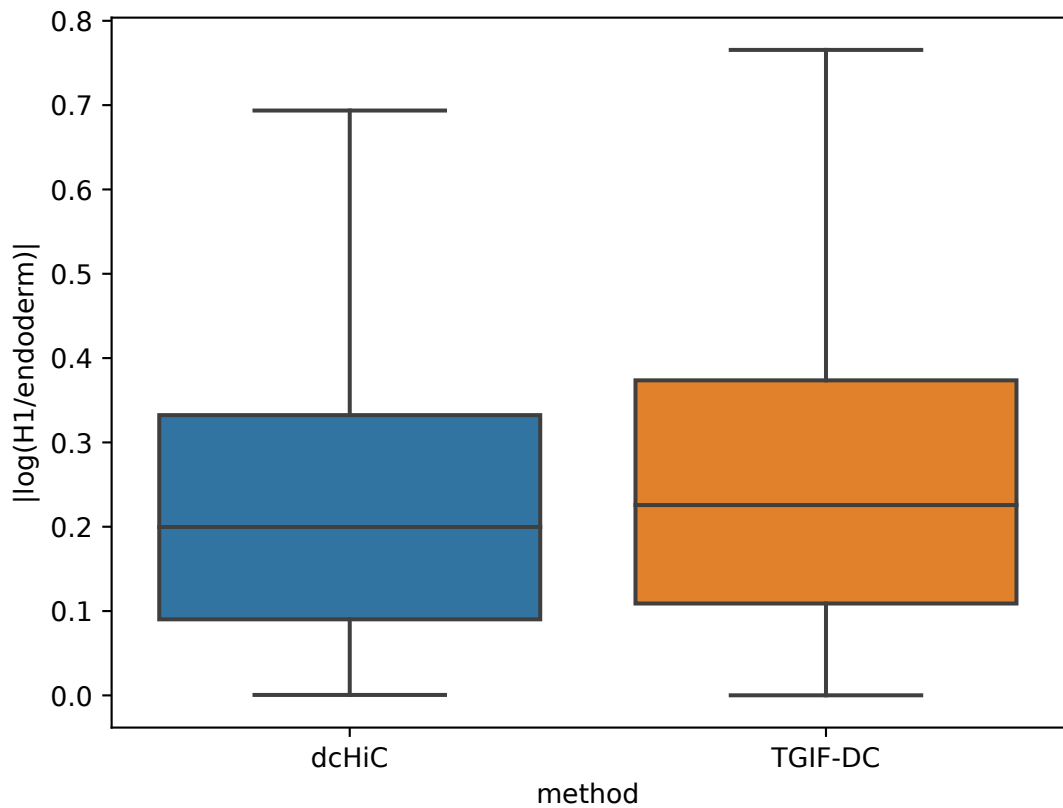

Supplement: Supplemental_Code_S2.tgz.zip [file sig_diff_compartment_accessibility_diff.pdf › TGIF_evaluation_scripts_by_figure/Fig3H_and_SuppFig4A/sig_diff_compartment_accessibility_diff.pdf]

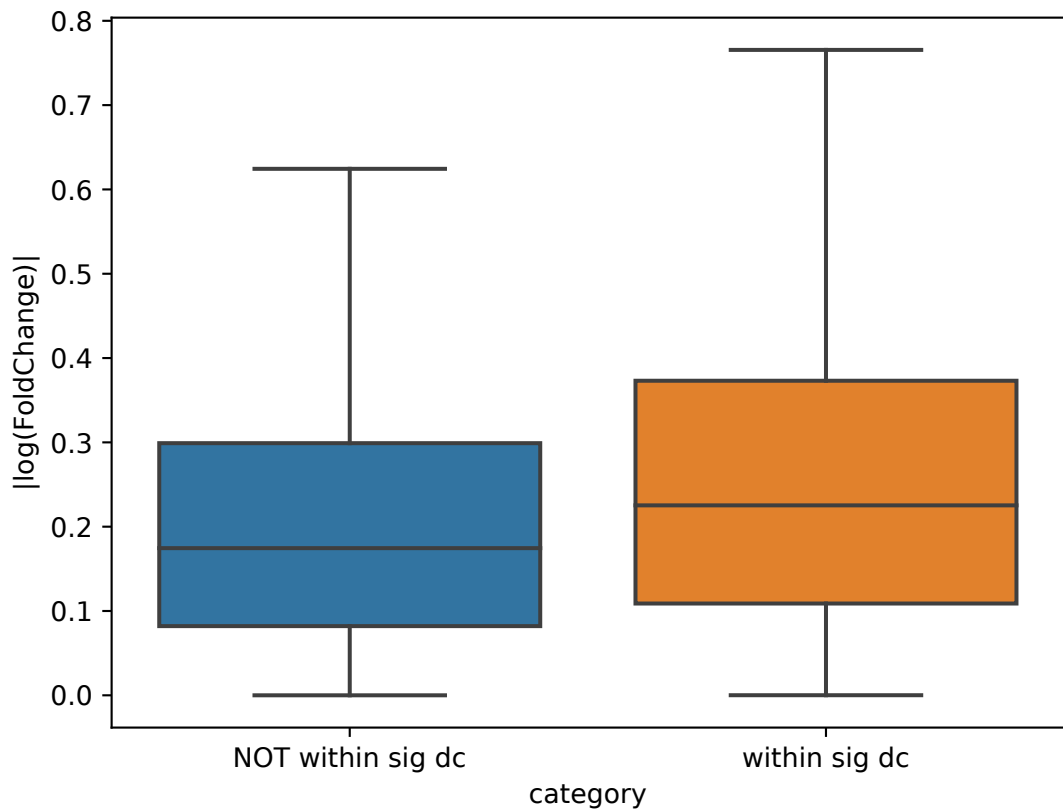

Supplement: Supplemental_Code_S2.tgz.zip [file within_sig_dc_vs_not.pdf › TGIF_evaluation_scripts_by_figure/Fig3H_and_SuppFig4A/tgif/within_sig_dc_vs_not.pdf]

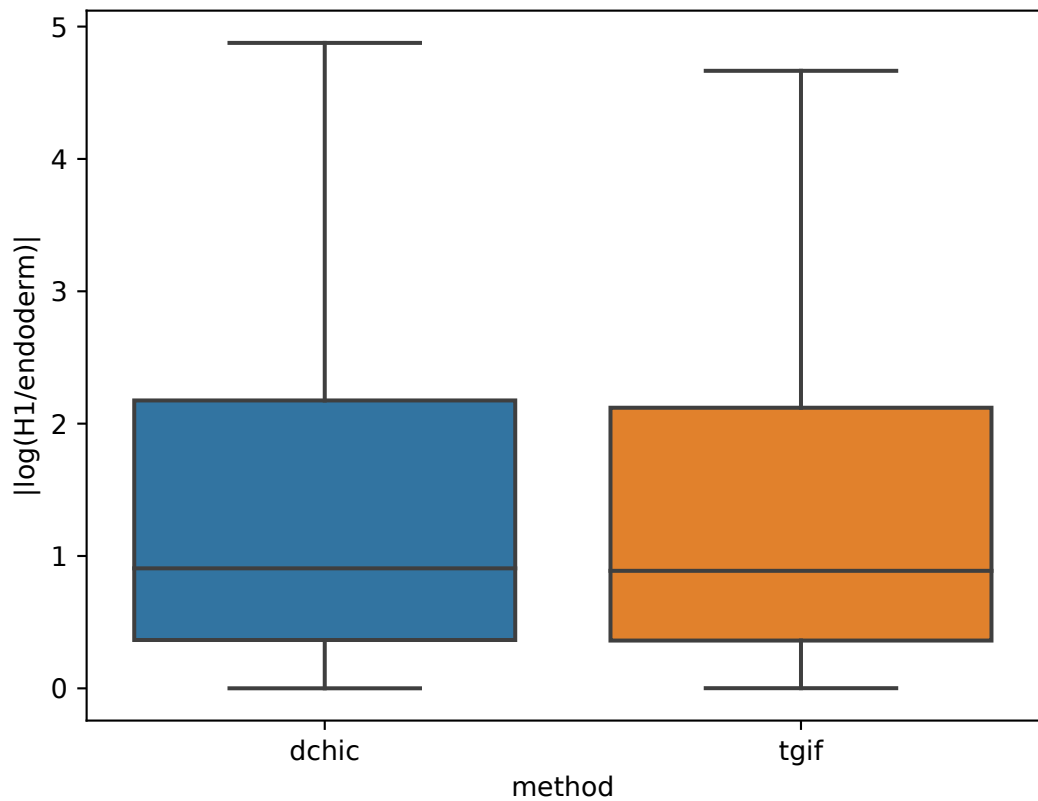

Supplement: Supplemental_Code_S2.tgz.zip [file tgif_vs_dchic.pdf › TGIF_evaluation_scripts_by_figure/Fig3I_and_SuppFig4B/tgif_vs_dchic.pdf]

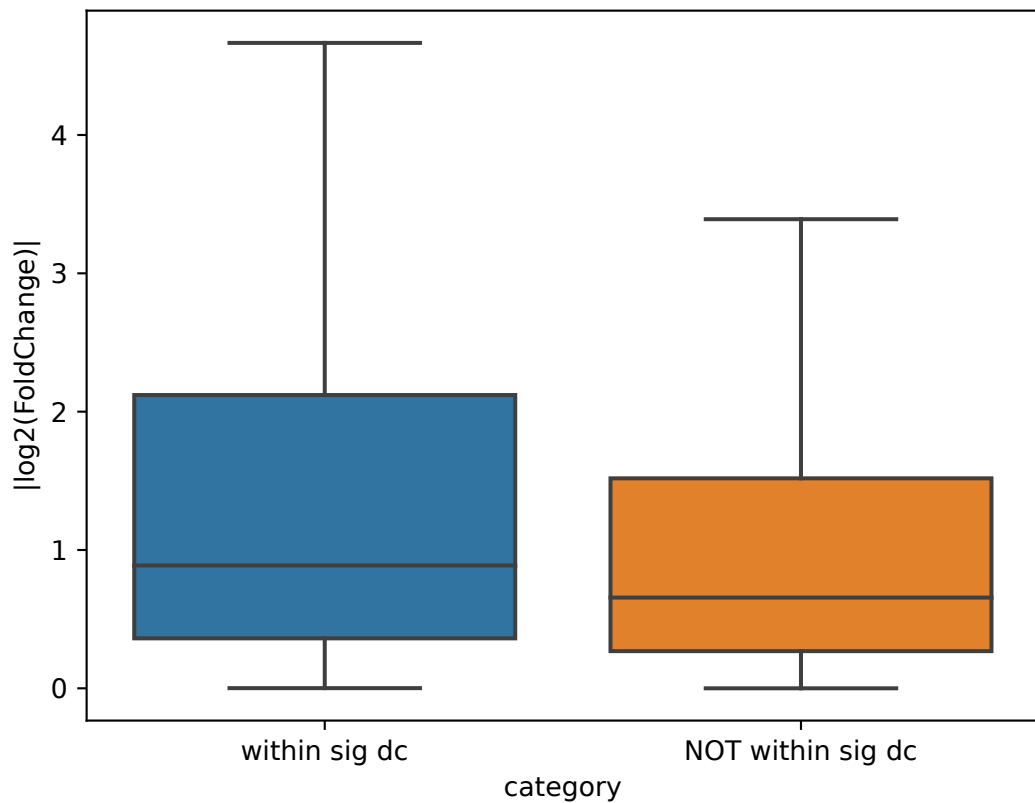

Supplement: Supplemental_Code_S2.tgz.zip [file tgif_within_sig_dc_vs_not.pdf › TGIF_evaluation_scripts_by_figure/Fig3I_and_SuppFig4B/tgif_within_sig_dc_vs_not.pdf]

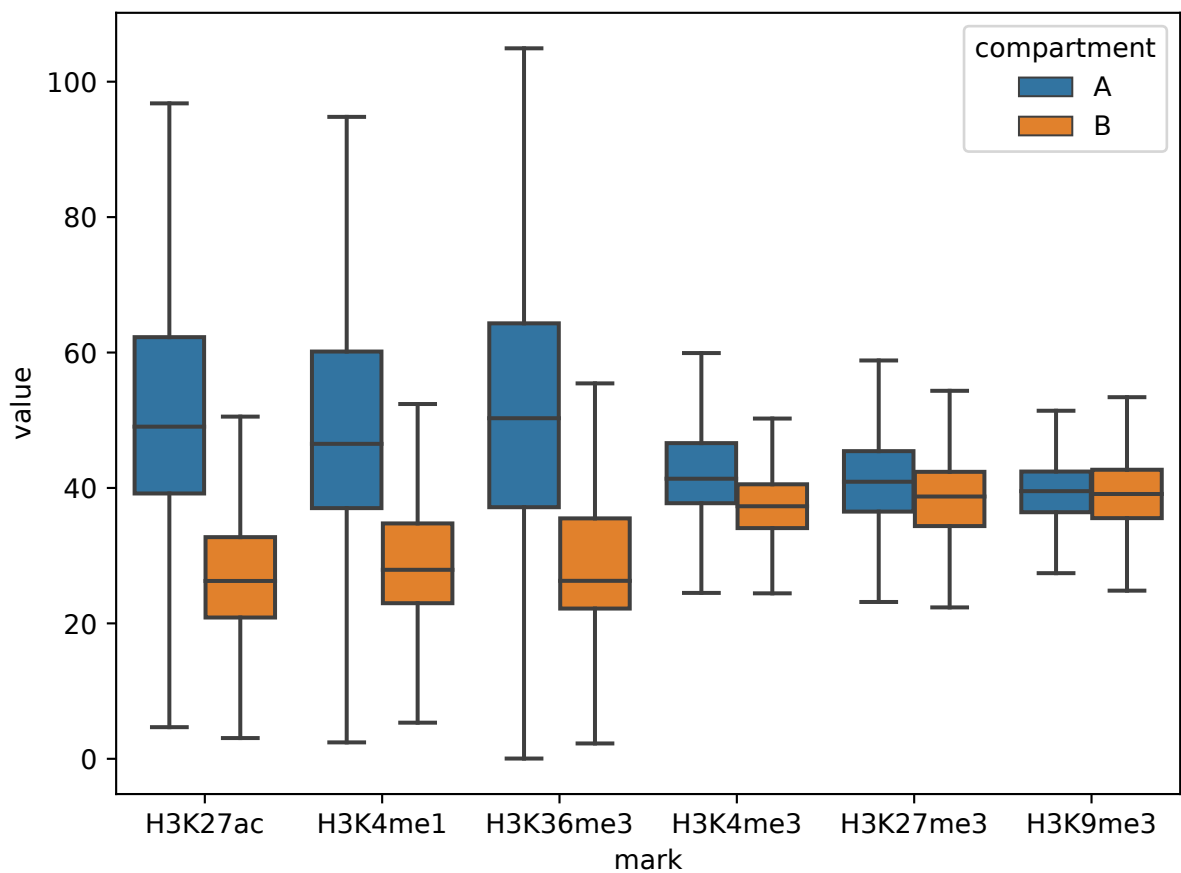

Supplement: Supplemental_Code_S2.tgz.zip [file histone_distribution_overall.pdf › TGIF_evaluation_scripts_by_figure/Fig4B/histone_distribution_overall.pdf]

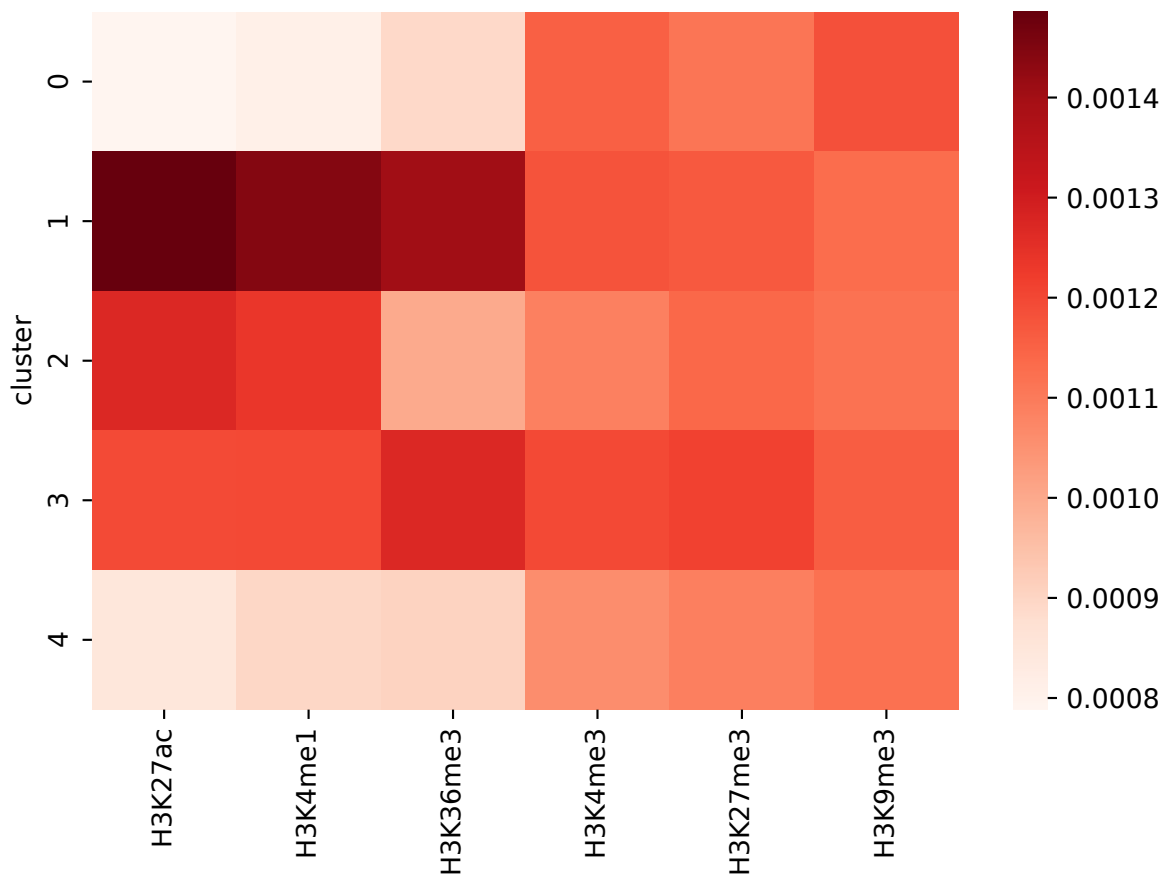

Supplement: Supplemental_Code_S2.tgz.zip [file overall_marks.pdf › TGIF_evaluation_scripts_by_figure/Fig4C/overall_marks.pdf]

sampled(M)

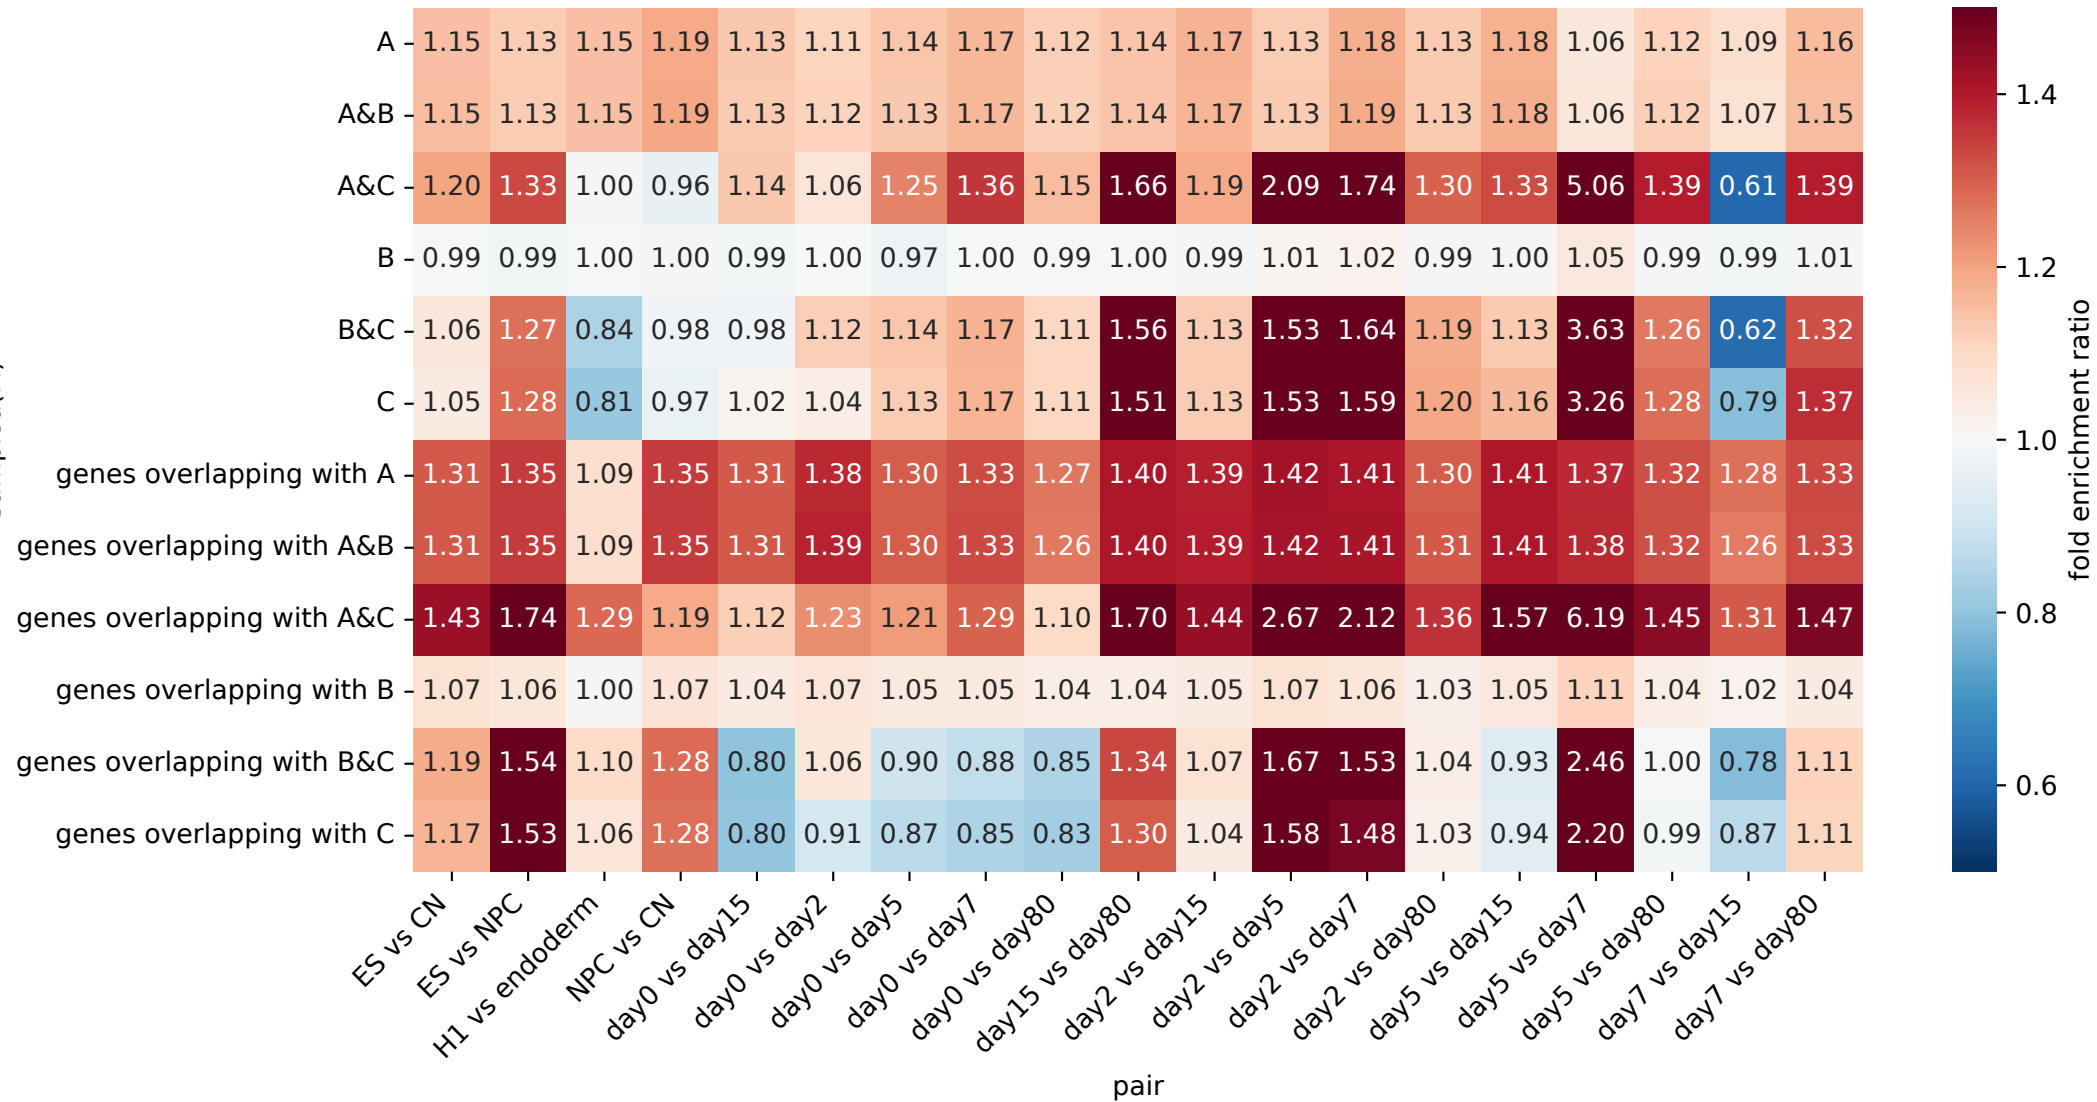

Supplement: Supplemental_Code_S2.tgz.zip [file pan_de_analysis_fold_enrichment.pdf › TGIF_evaluation_scripts_by_figure/Fig5B_and_SuppTab5-7/figures/pan_de_analysis_fold_enrichment.pdf]

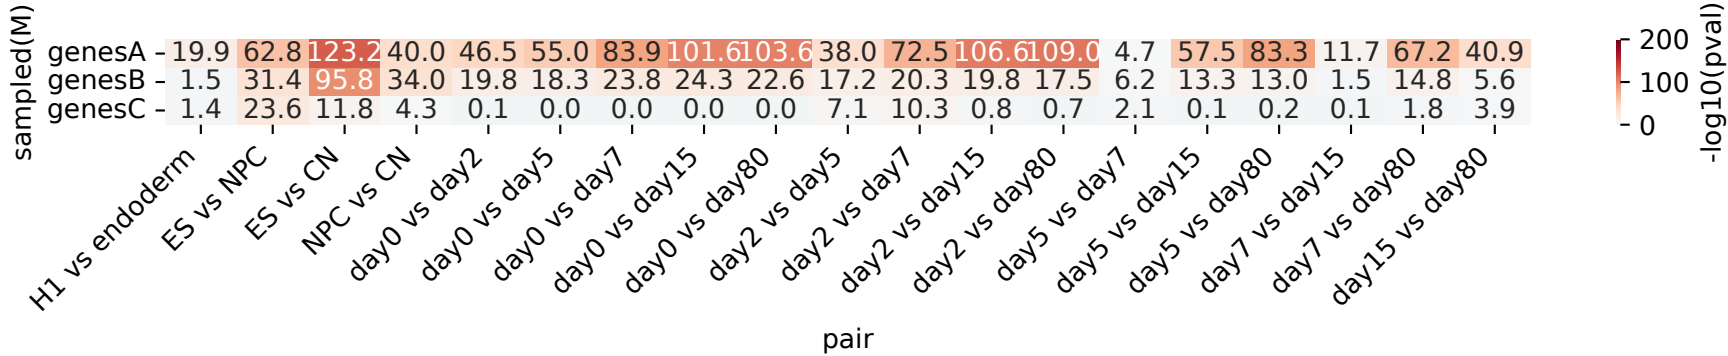

Supplement: Supplemental_Code_S2.tgz.zip [file pan_de_analysis_genes_neg_log_pval.pdf › TGIF_evaluation_scripts_by_figure/Fig5B_and_SuppTab5-7/figures/pan_de_analysis_genes_neg_log_pval.pdf]

sampled(M)

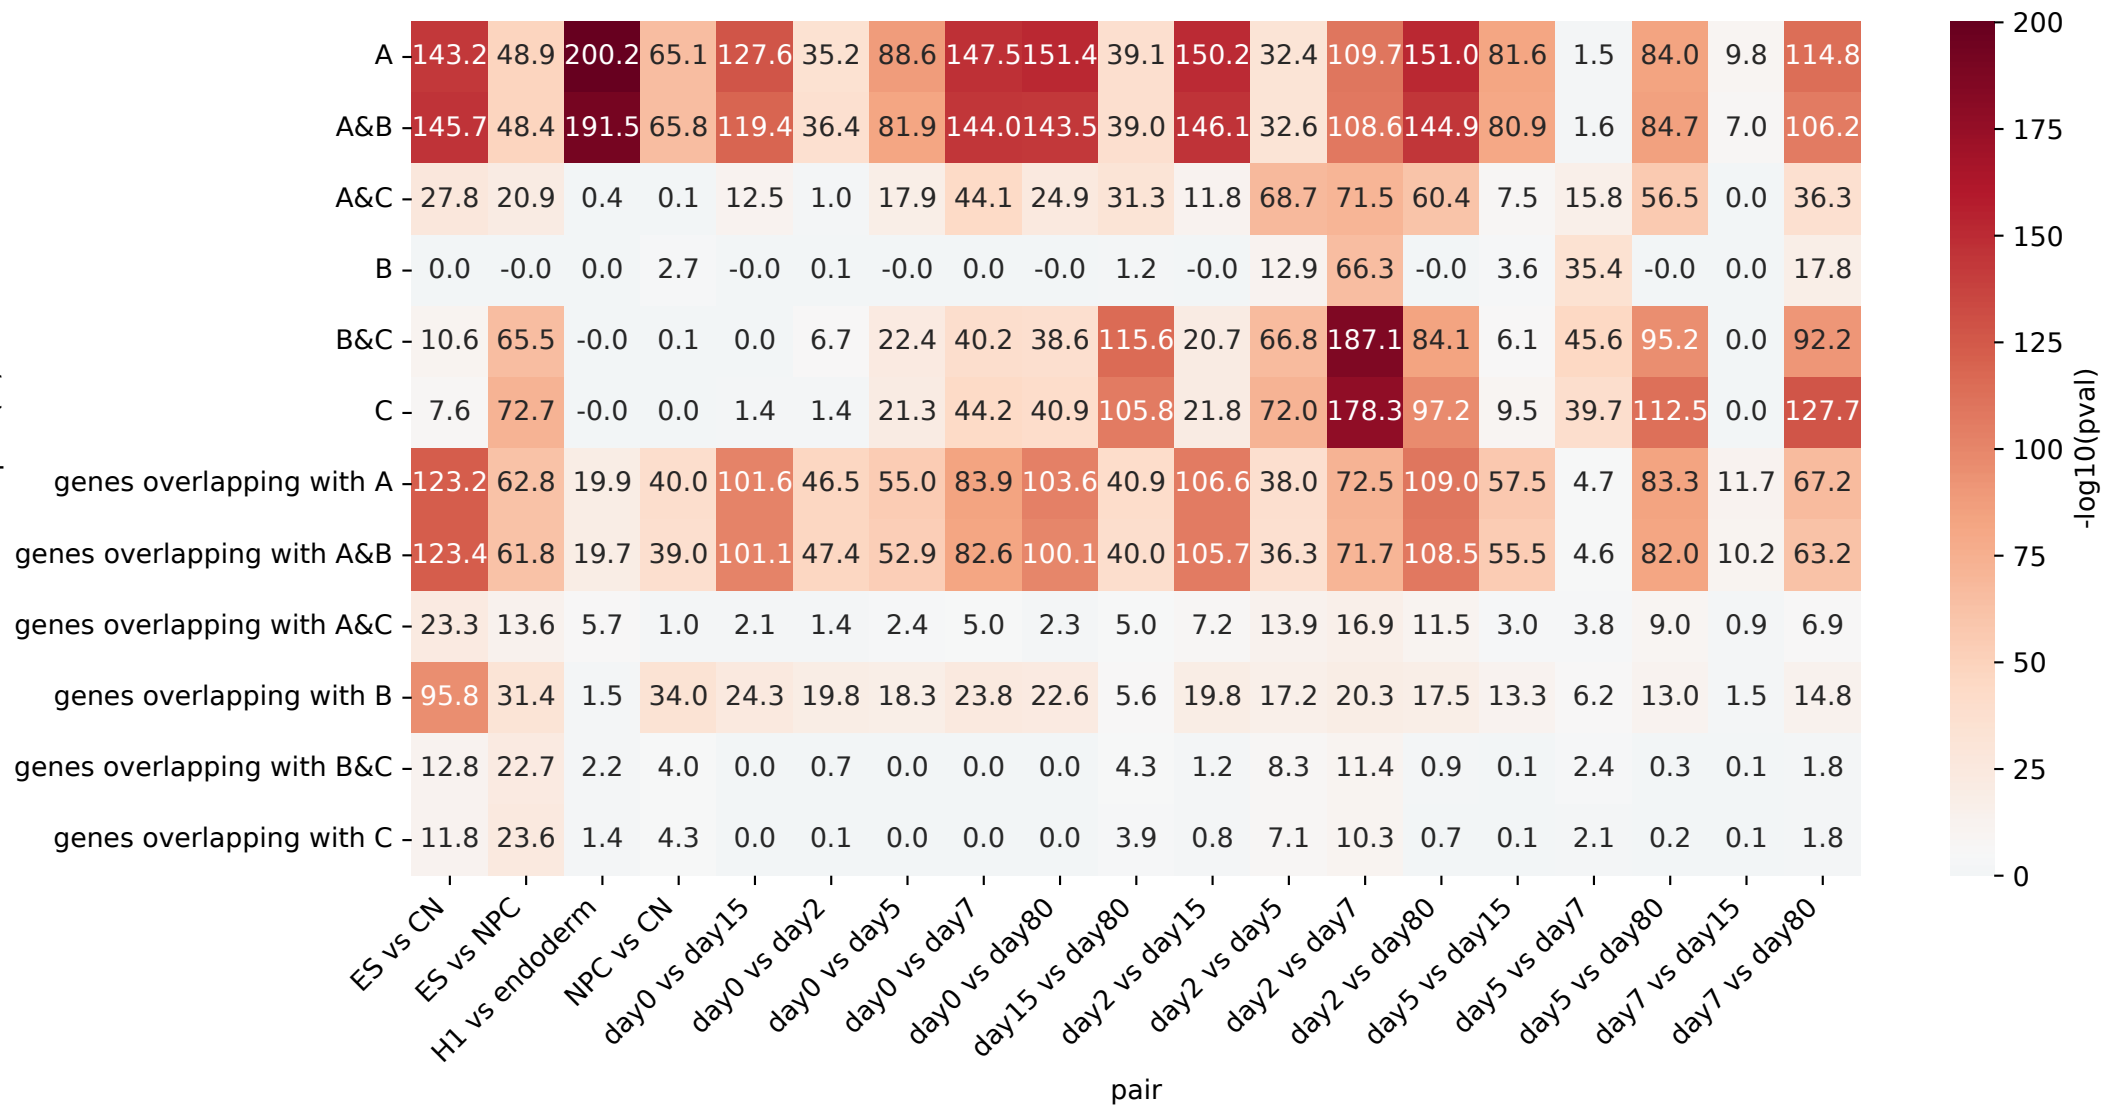

Supplement: Supplemental_Code_S2.tgz.zip [file pan_de_analysis_neg_log_pval.pdf › TGIF_evaluation_scripts_by_figure/Fig5B_and_SuppTab5-7/figures/pan_de_analysis_neg_log_pval.pdf]

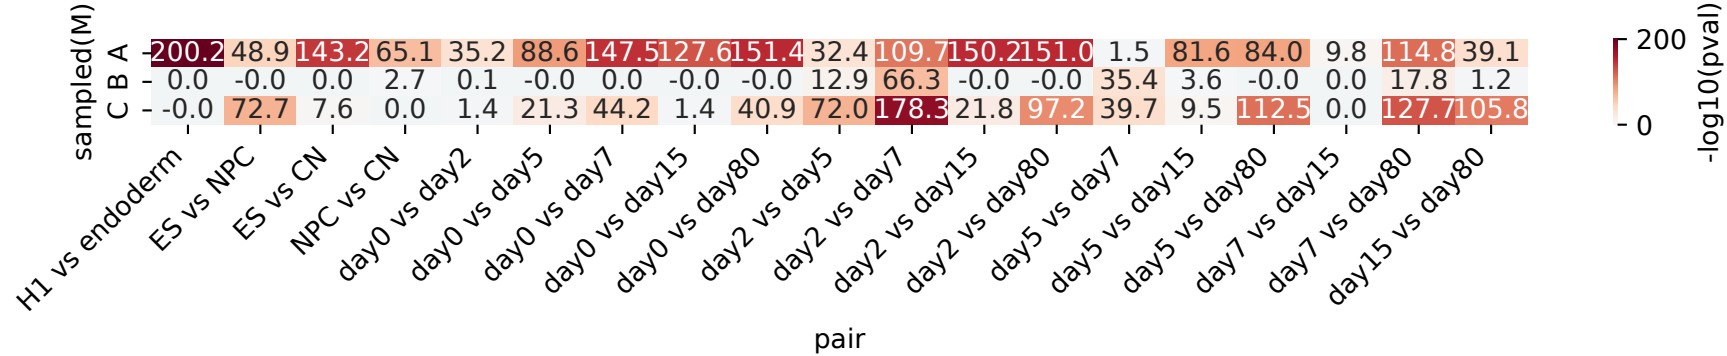

Supplement: Supplemental_Code_S2.tgz.zip [file pan_de_analysis_regions_neg_log_pval.pdf › TGIF_evaluation_scripts_by_figure/Fig5B_and_SuppTab5-7/figures/pan_de_analysis_regions_neg_log_pval.pdf]

1term

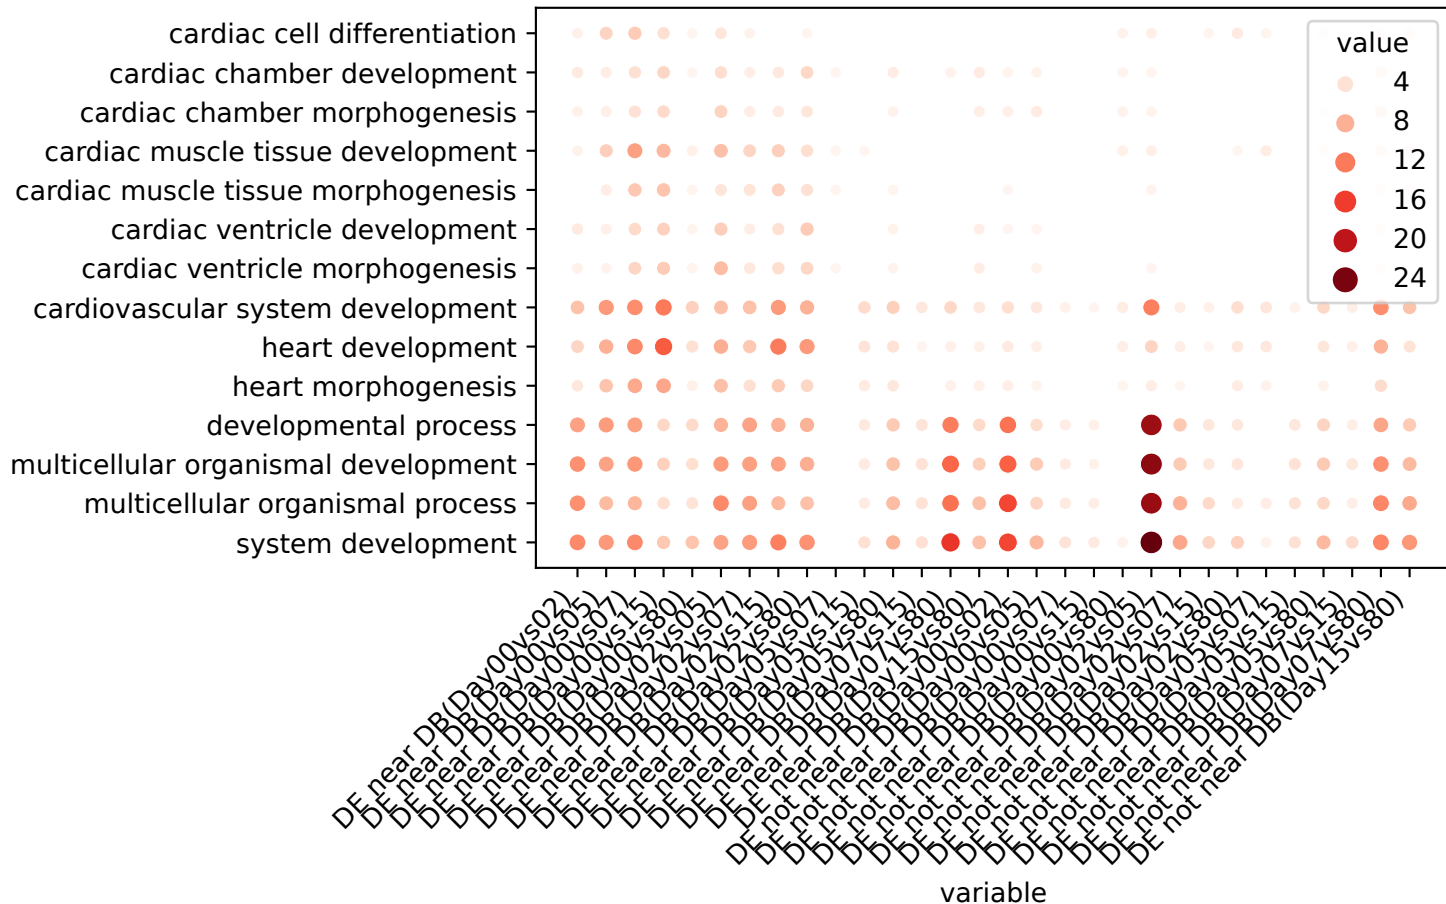

Supplement: Supplemental_Code_S2.tgz.zip [file select_terms.pdf › TGIF_evaluation_scripts_by_figure/Fig5C_and_SuppTab8/3_look_at_top_terms/select_terms.pdf]

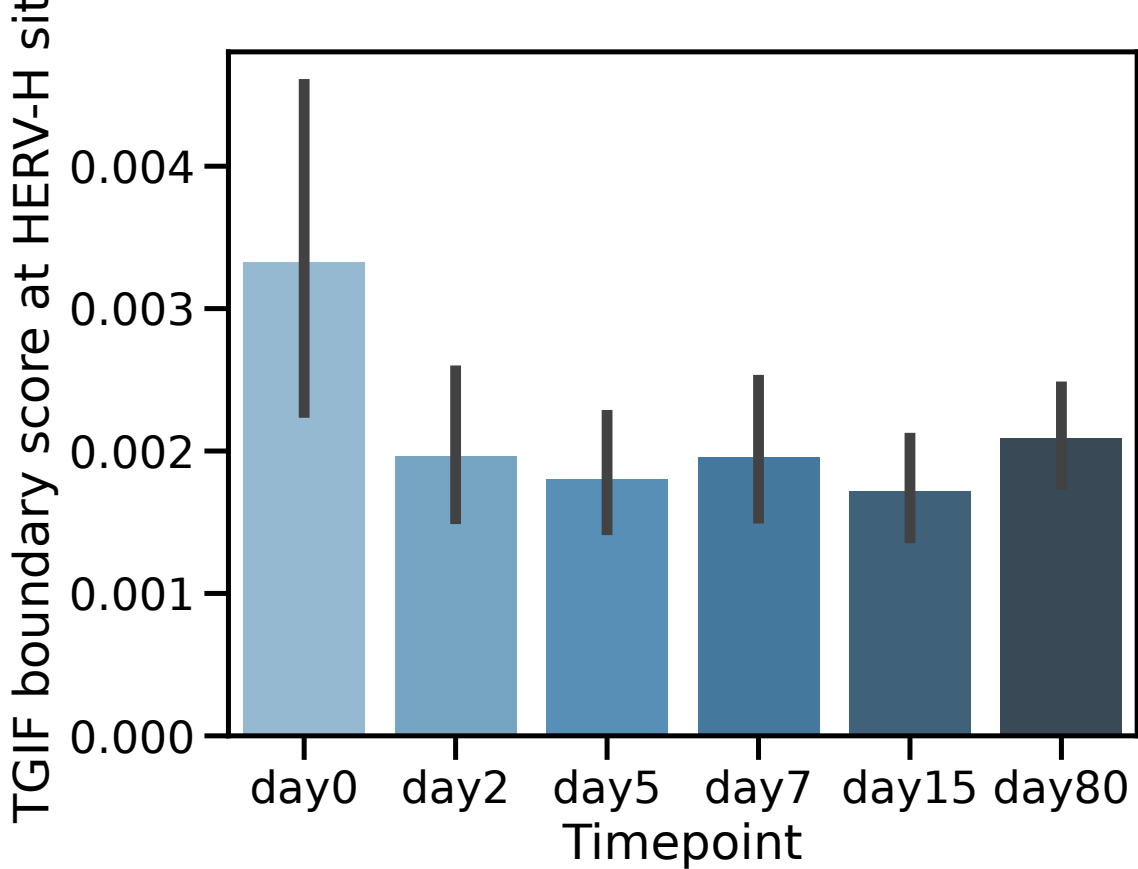

Supplement: Supplemental_Code_S2.tgz.zip [file figure_hervh_site_score.pdf › TGIF_evaluation_scripts_by_figure/Fig6AB/figure_hervh_site_score.pdf]

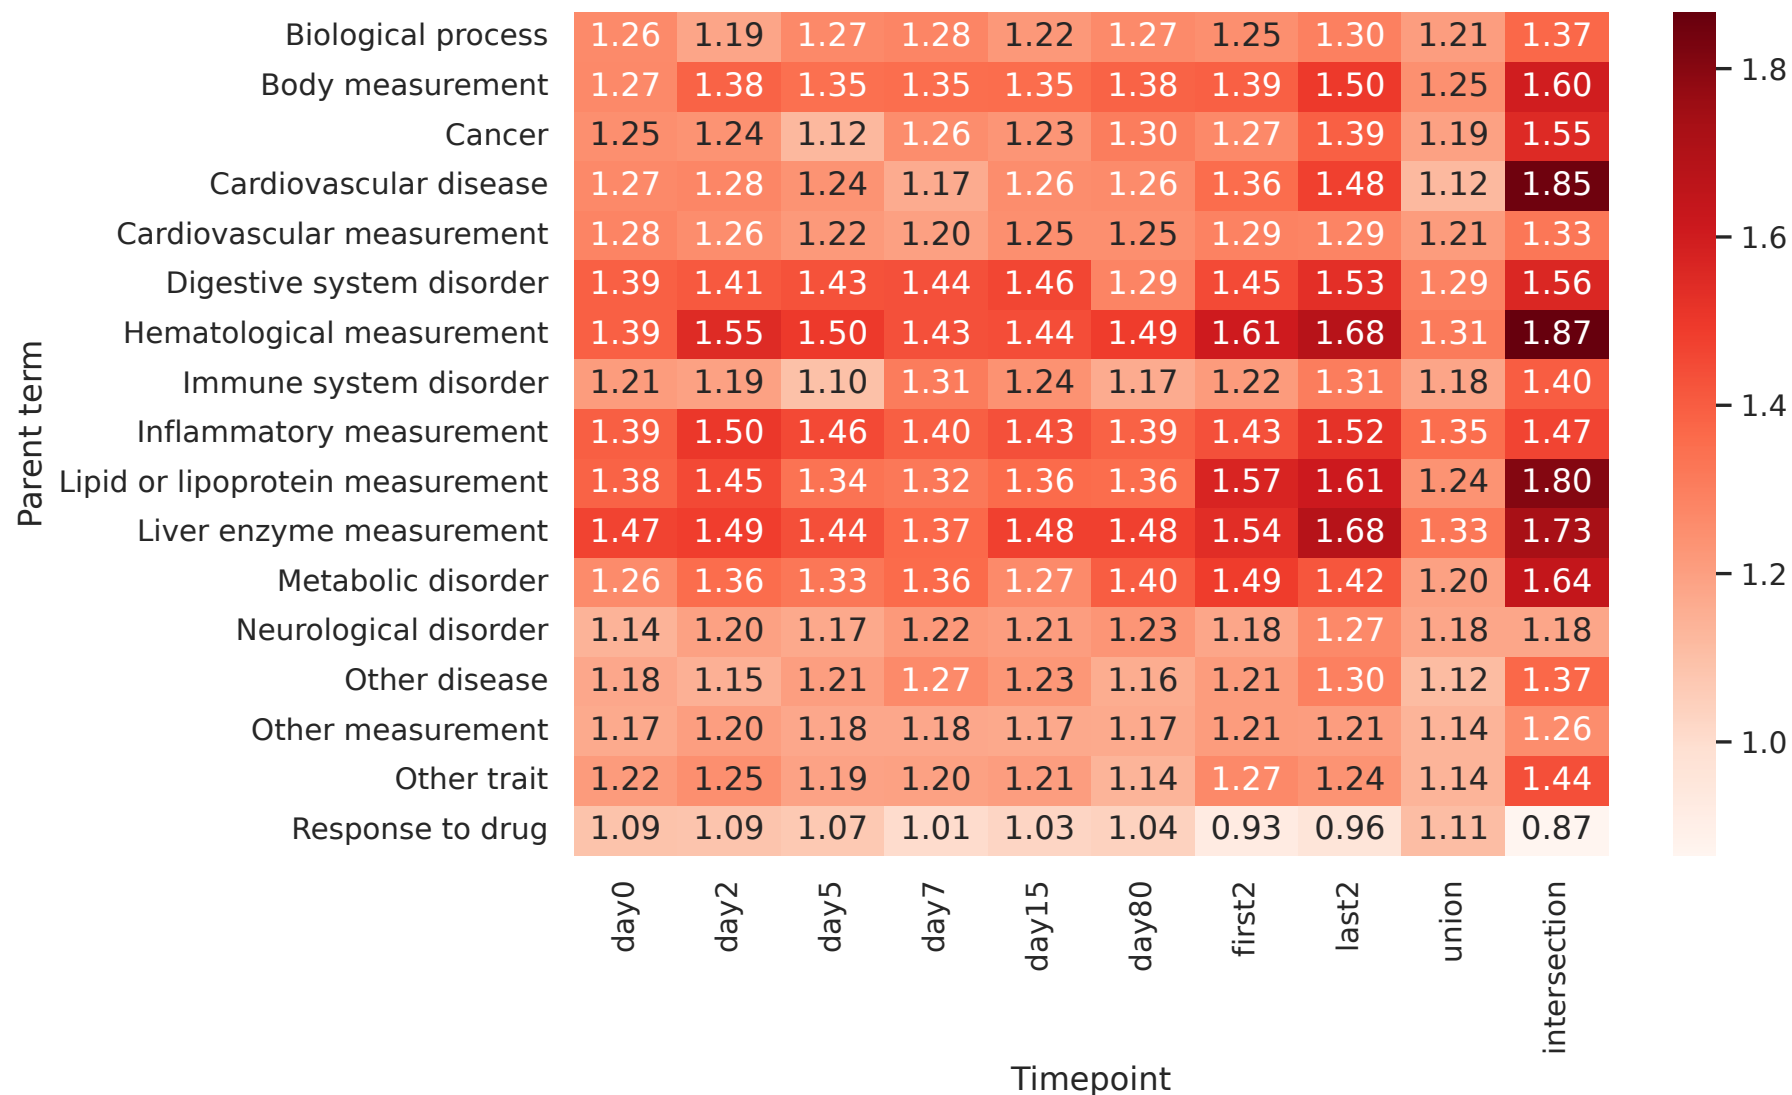

Supplement: Supplemental_Code_S2.tgz.zip [file fold_enrichment.pdf › TGIF_evaluation_scripts_by_figure/Fig7A/enrichment/combine/fold_enrichment.pdf]

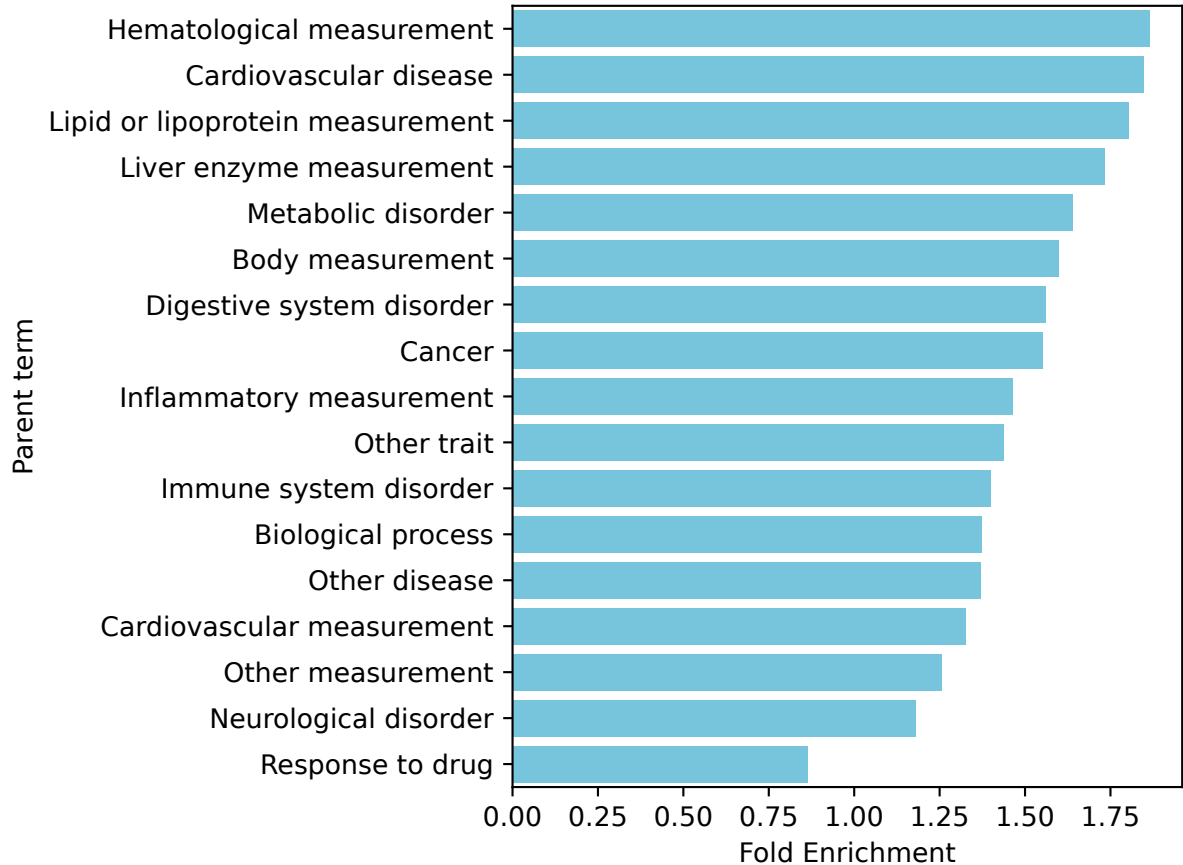

Supplement: Supplemental_Code_S2.tgz.zip [file intersection.pdf › TGIF_evaluation_scripts_by_figure/Fig7A/enrichment/combine/intersection.pdf]

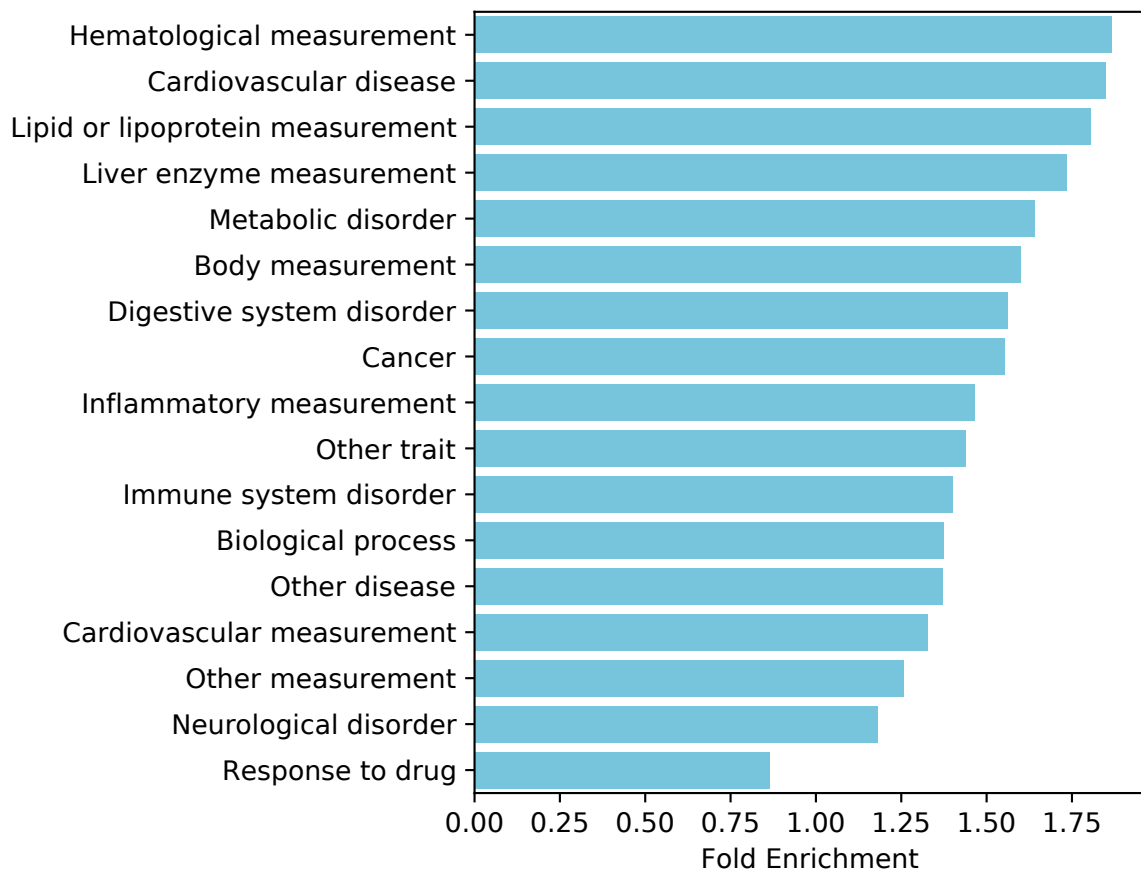

Supplement: Supplemental_Code_S2.tgz.zip [file intersection.pdf › TGIF_evaluation_scripts_by_figure/Fig7A/enrichment/intersection.pdf]

1term

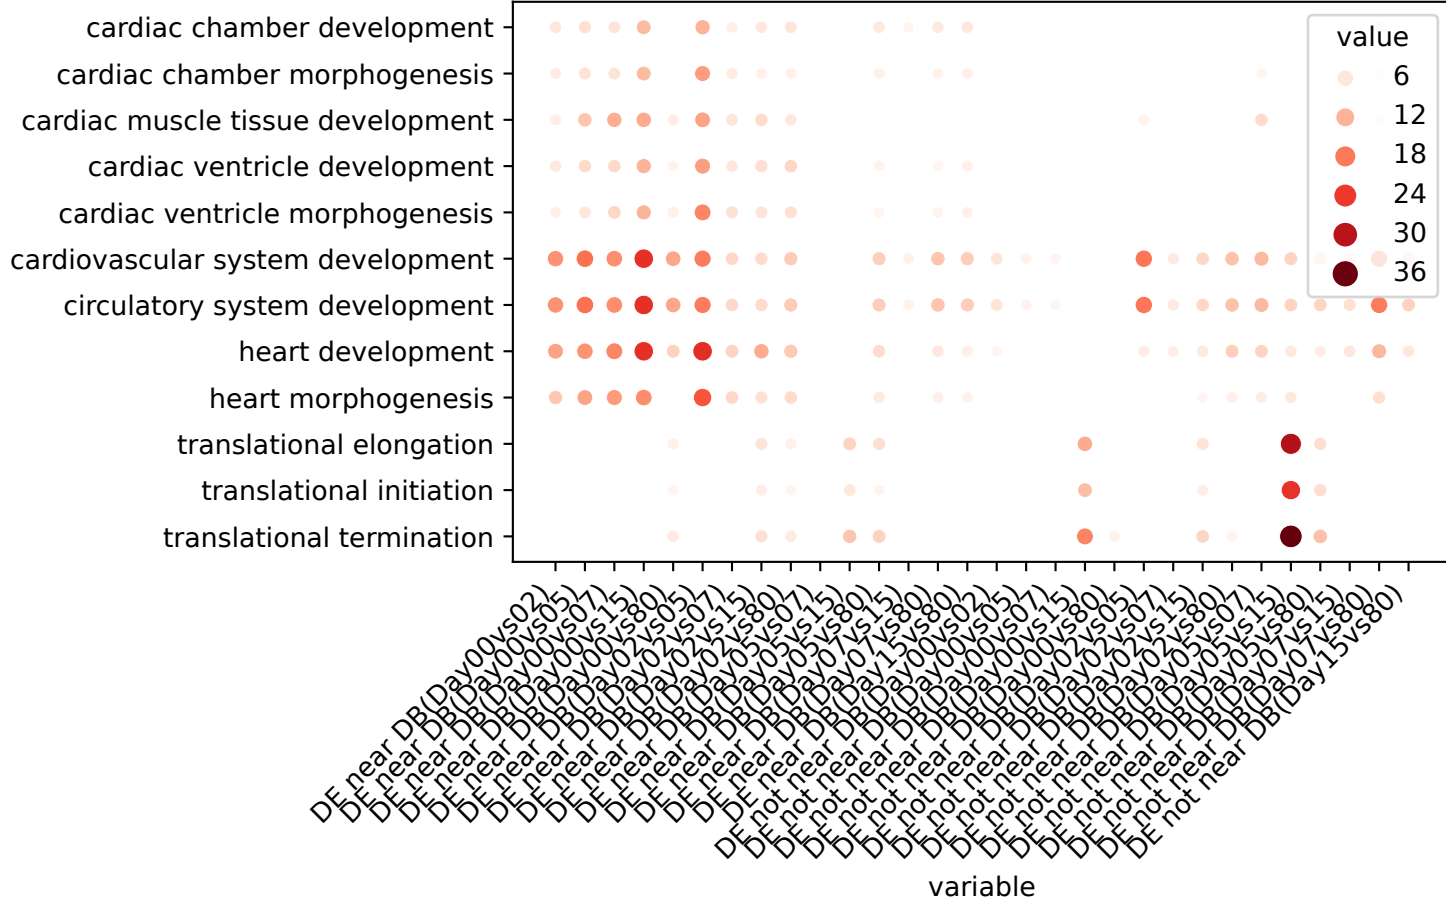

Supplement: Supplemental_Code_S2.tgz.zip [file select_terms.pdf › TGIF_evaluation_scripts_by_figure/SuppTab10/3_look_at_top_terms/select_terms.pdf]

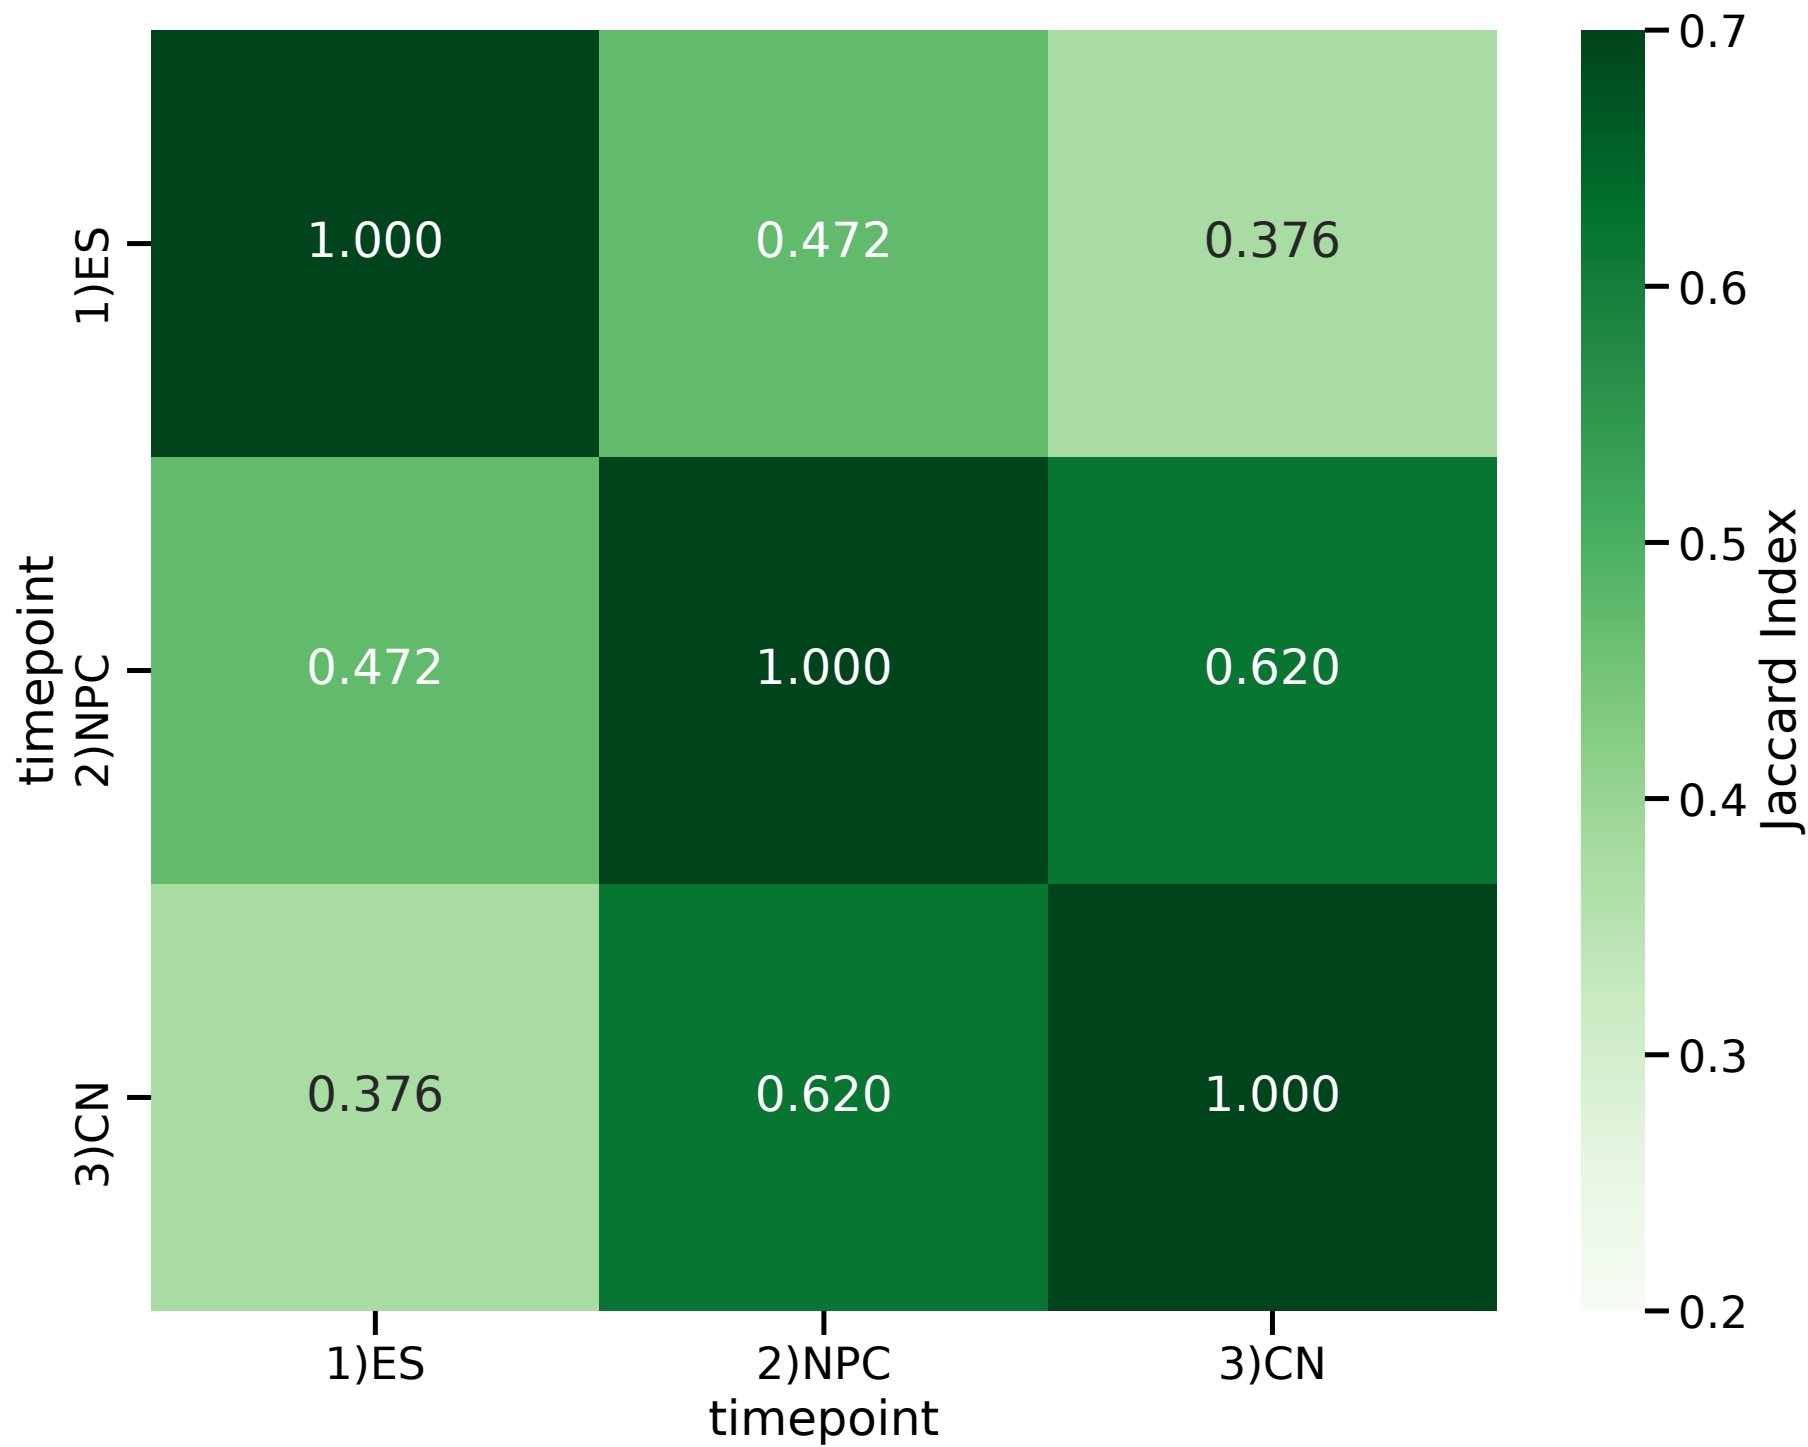

Supplement: Supplemental_Code_S3.tgz.zip [file jaccard_index.pdf › TGIF_evaluation_scripts_by_supp_figure/SuppFig10B/jaccard_index.pdf]

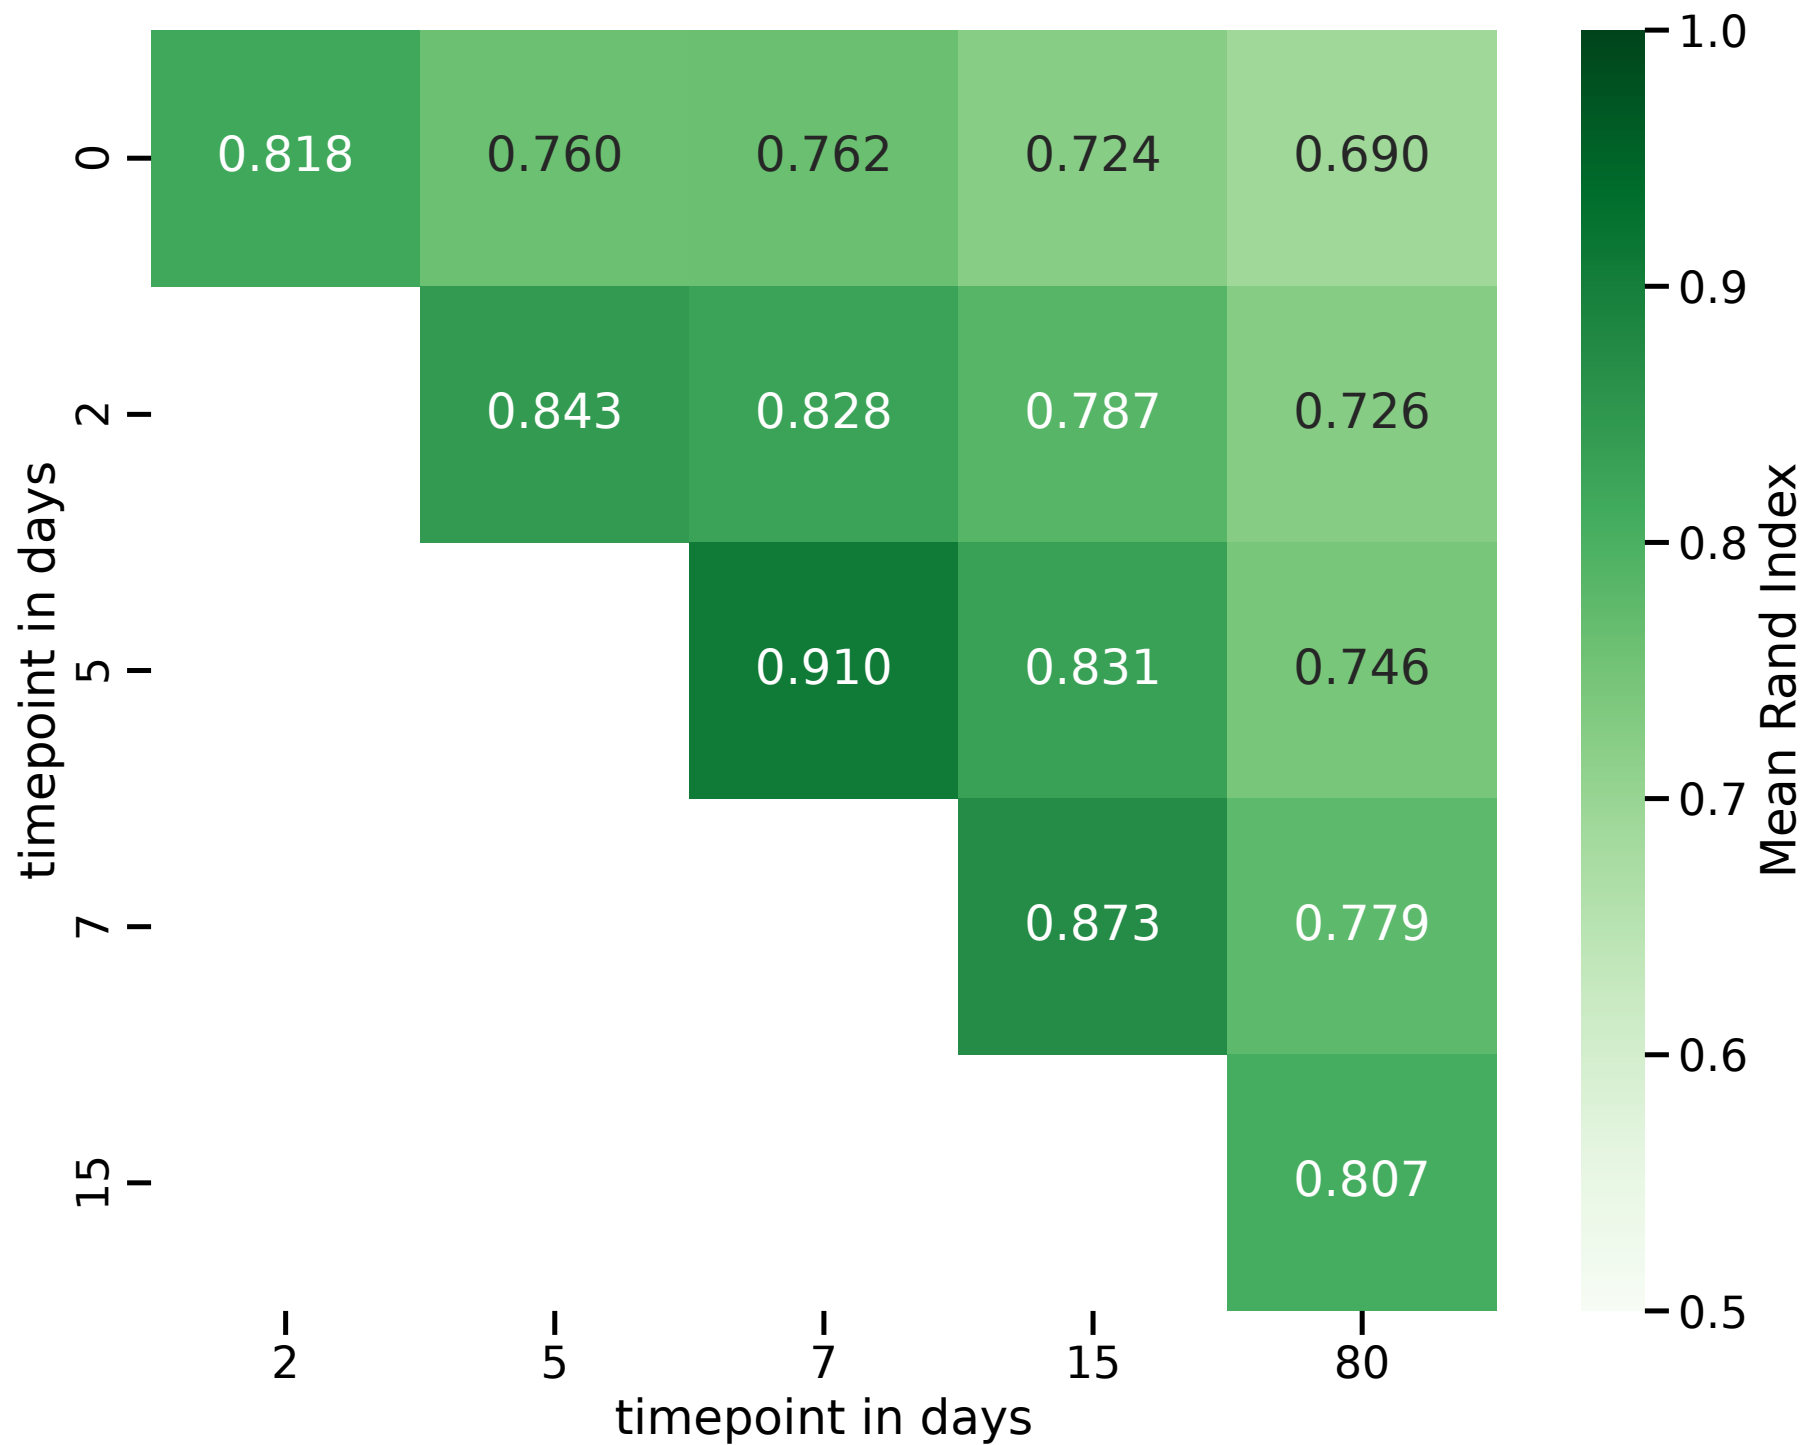

Supplement: Supplemental_Code_S3.tgz.zip [file rand_index.pdf › TGIF_evaluation_scripts_by_supp_figure/SuppFig11A/rand_index.pdf]

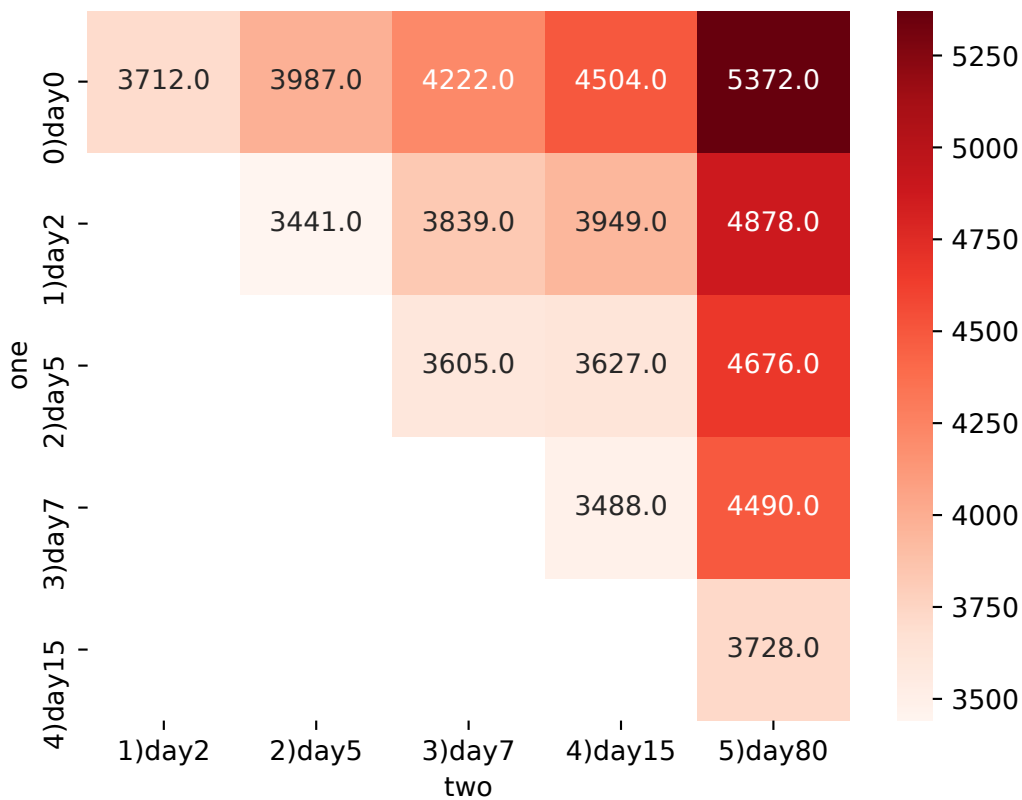

Supplement: Supplemental_Code_S3.tgz.zip [file count_sig_db_cardio.pdf › TGIF_evaluation_scripts_by_supp_figure/SuppFig11B_and_SuppFig12AC/count_sig_db_cardio.pdf]

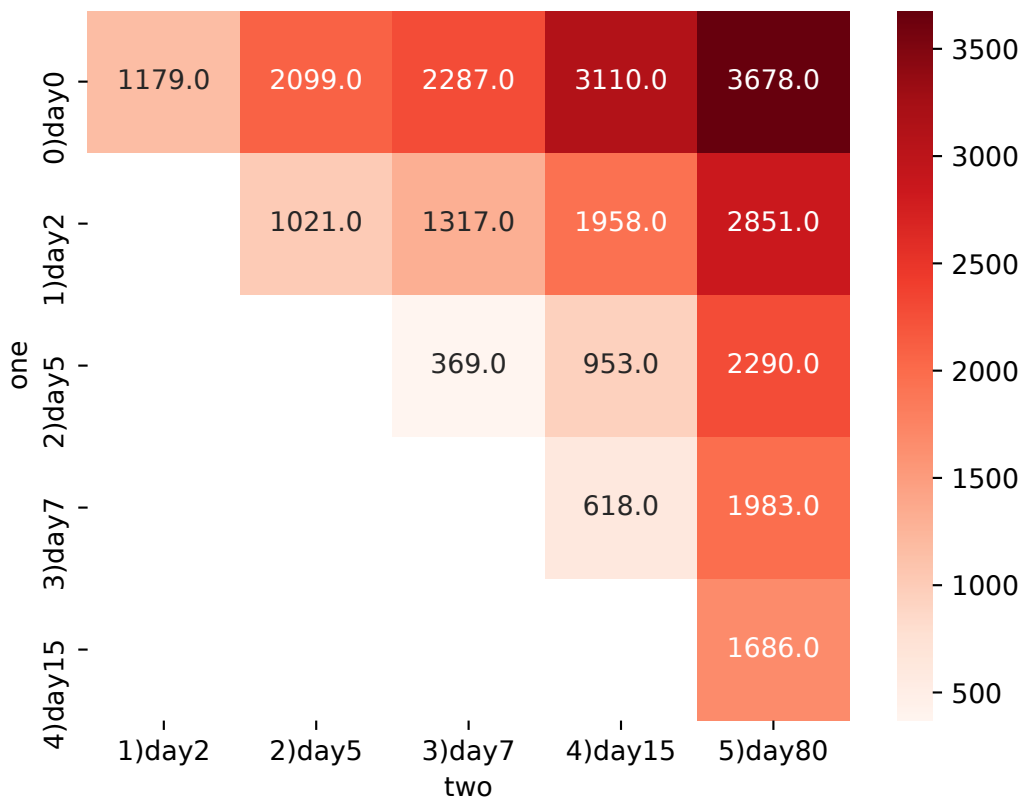

Supplement: Supplemental_Code_S3.tgz.zip [file count_sig_dc_cardio.pdf › TGIF_evaluation_scripts_by_supp_figure/SuppFig11B_and_SuppFig12AC/count_sig_dc_cardio.pdf]

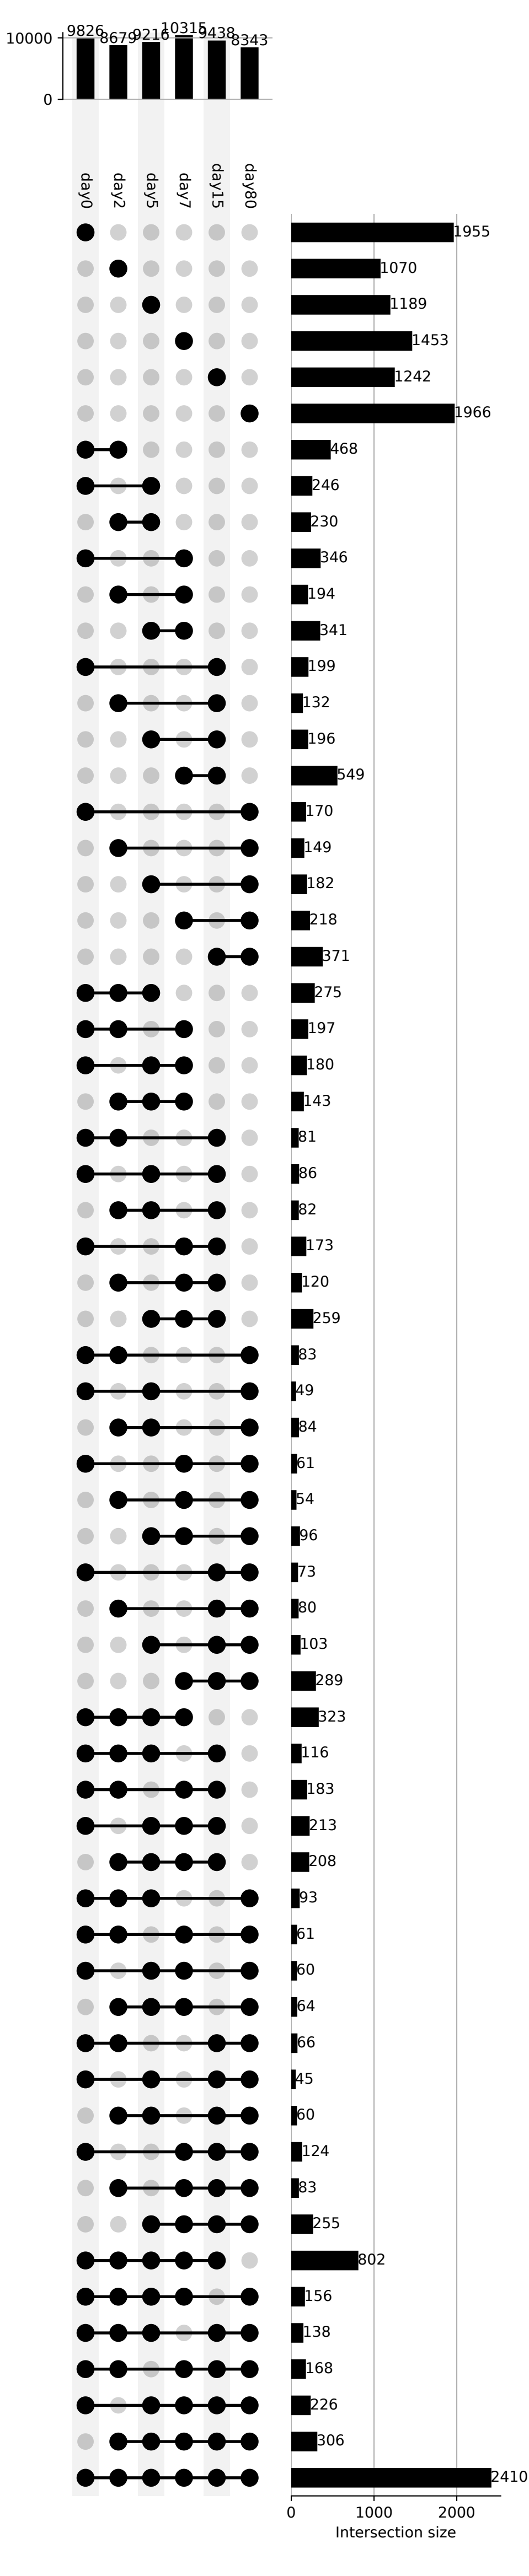

Supplement: Supplemental_Code_S3.tgz.zip [file upset_cardio.pdf › TGIF_evaluation_scripts_by_supp_figure/SuppFig11B_and_SuppFig12AC/upset_cardio.pdf]

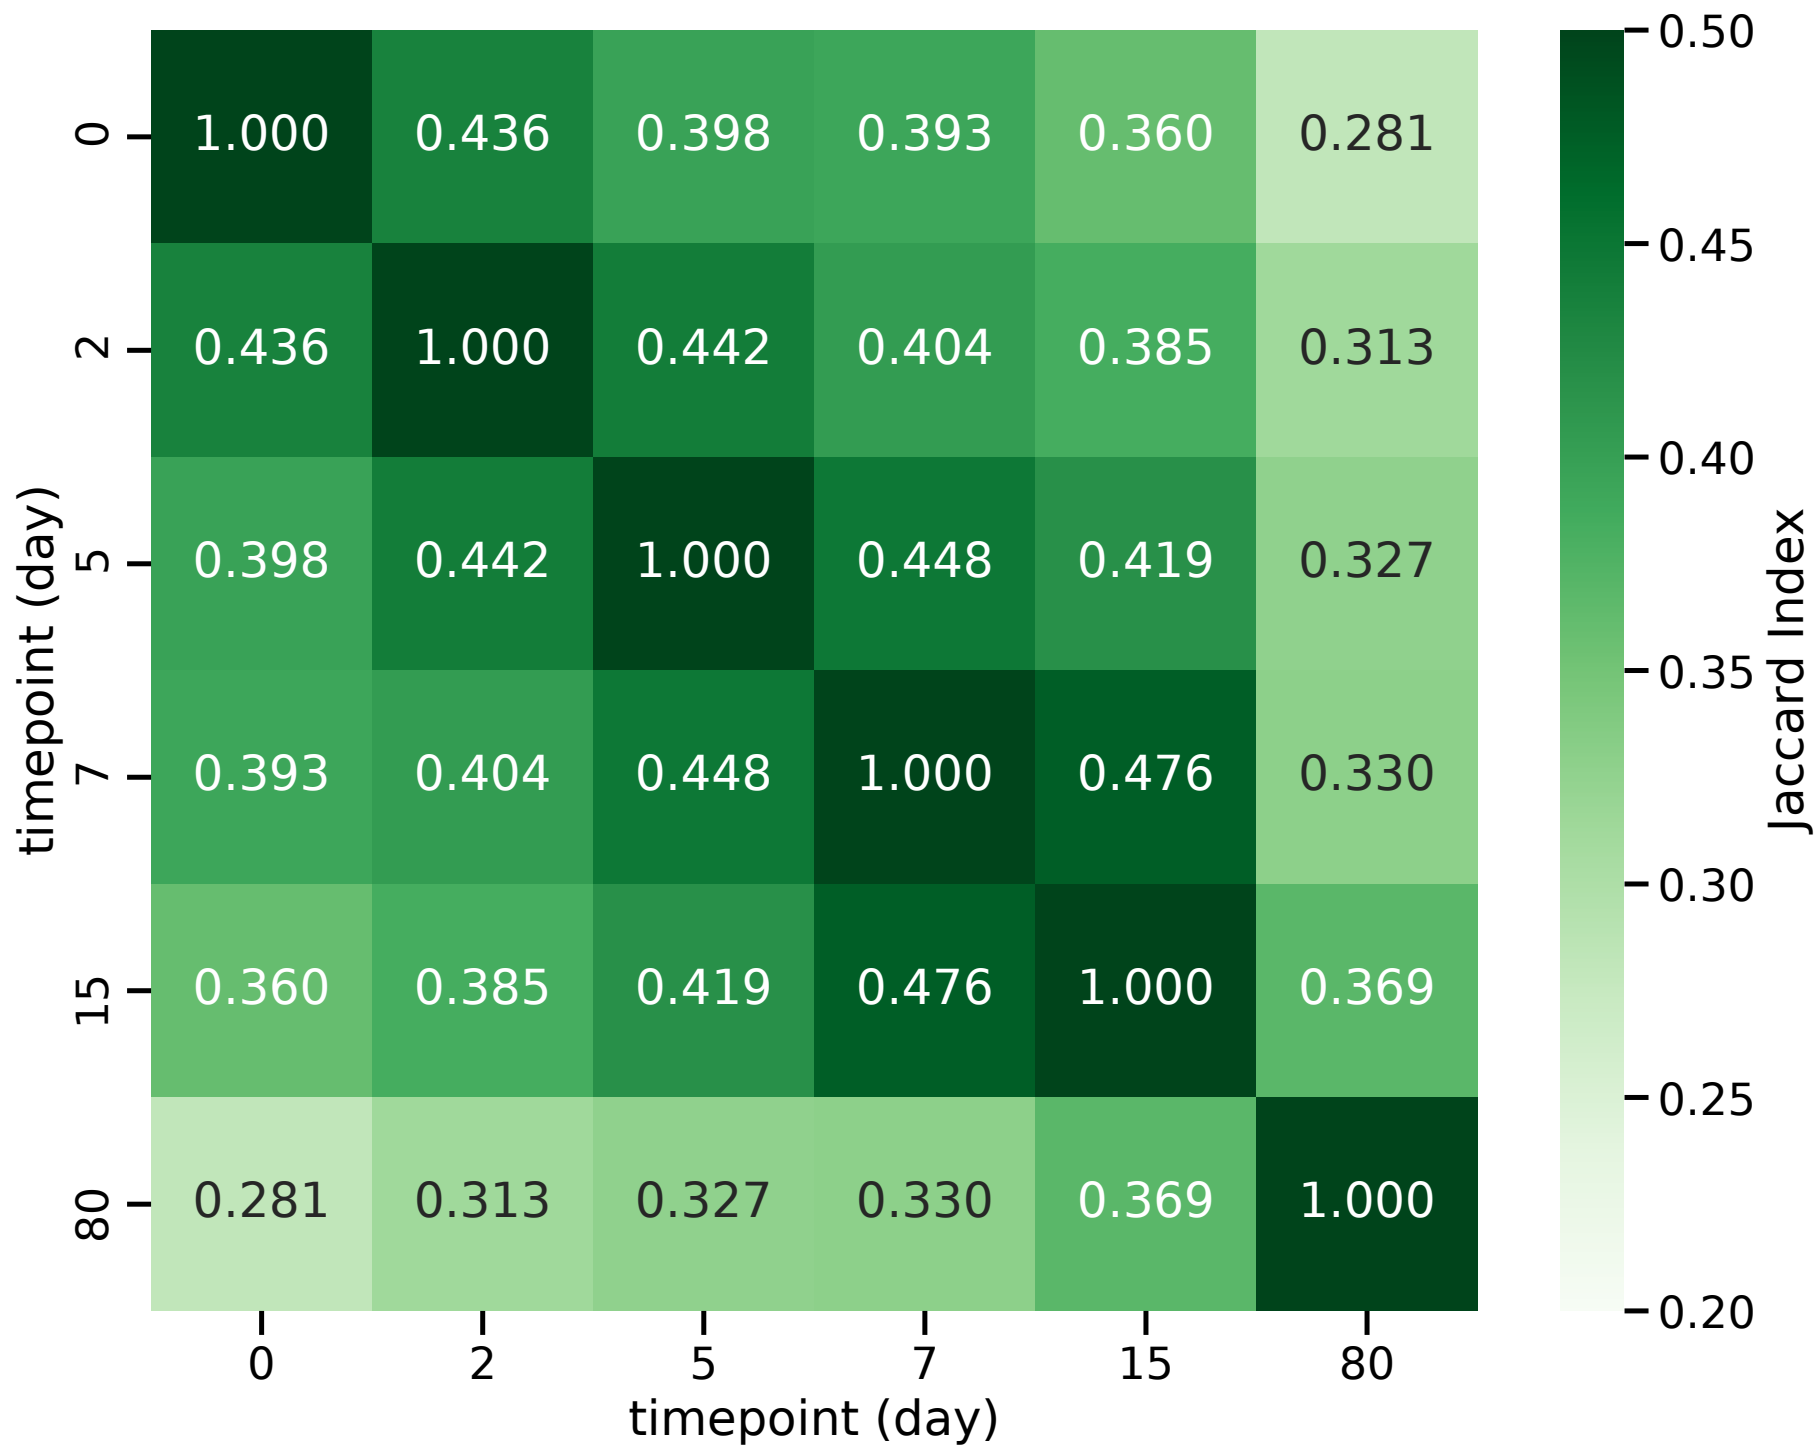

Supplement: Supplemental_Code_S3.tgz.zip [file jaccard_index.pdf › TGIF_evaluation_scripts_by_supp_figure/SuppFig12B/jaccard_index.pdf]

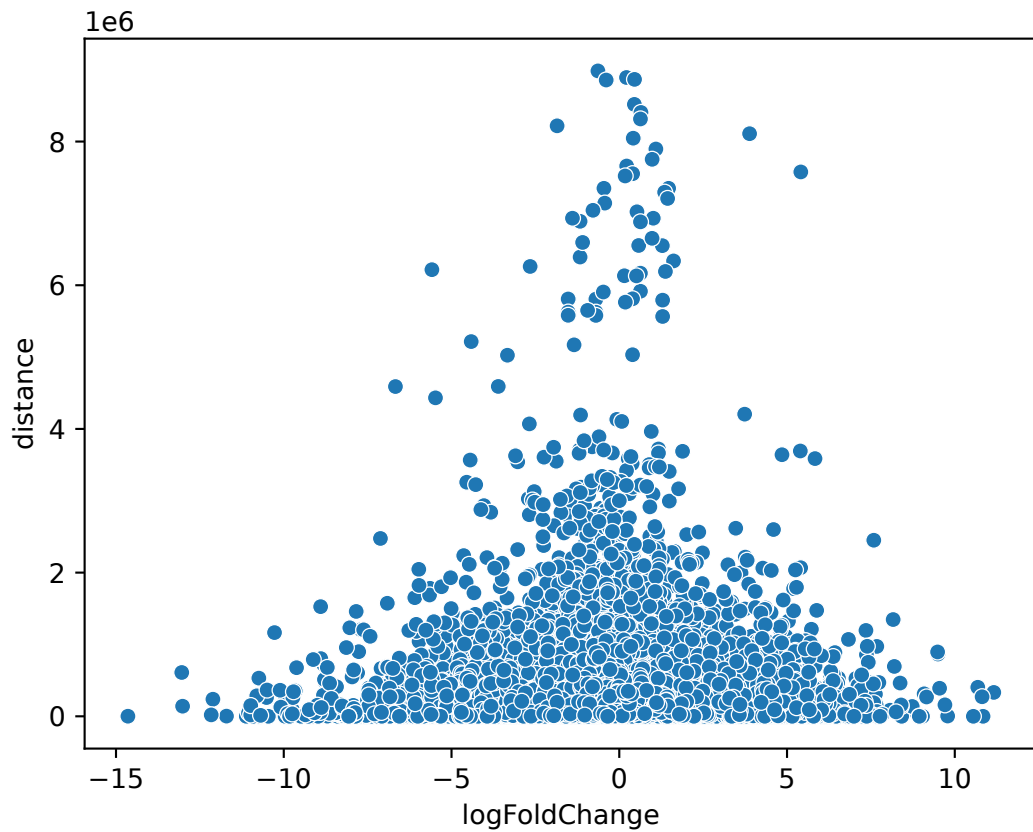

Supplement: Supplemental_Code_S3.tgz.zip [file logFoldChange_vs_distance.pdf › TGIF_evaluation_scripts_by_supp_figure/SuppFig17/logFoldChange_vs_distance.pdf]

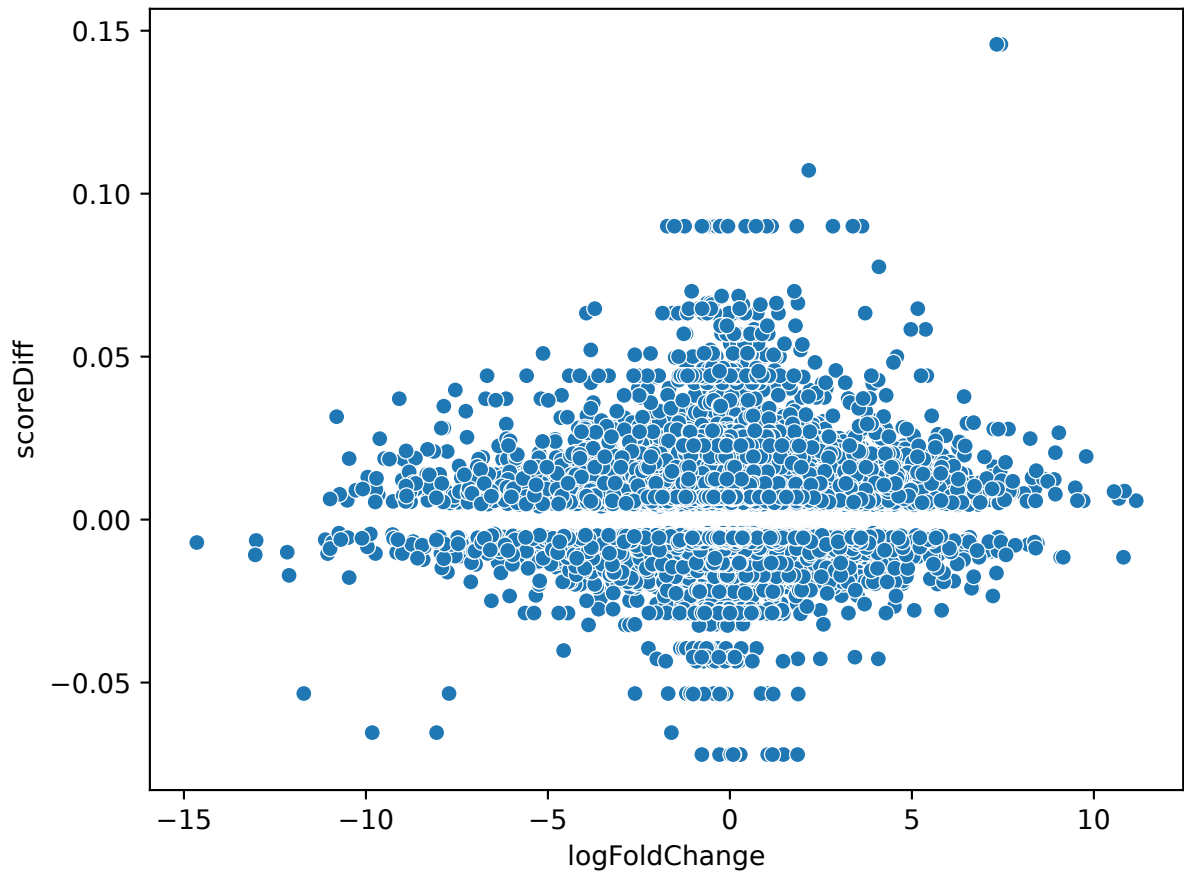

Supplement: Supplemental_Code_S3.tgz.zip [file logFoldChange_vs_scoreDiff.pdf › TGIF_evaluation_scripts_by_supp_figure/SuppFig17/logFoldChange_vs_scoreDiff.pdf]

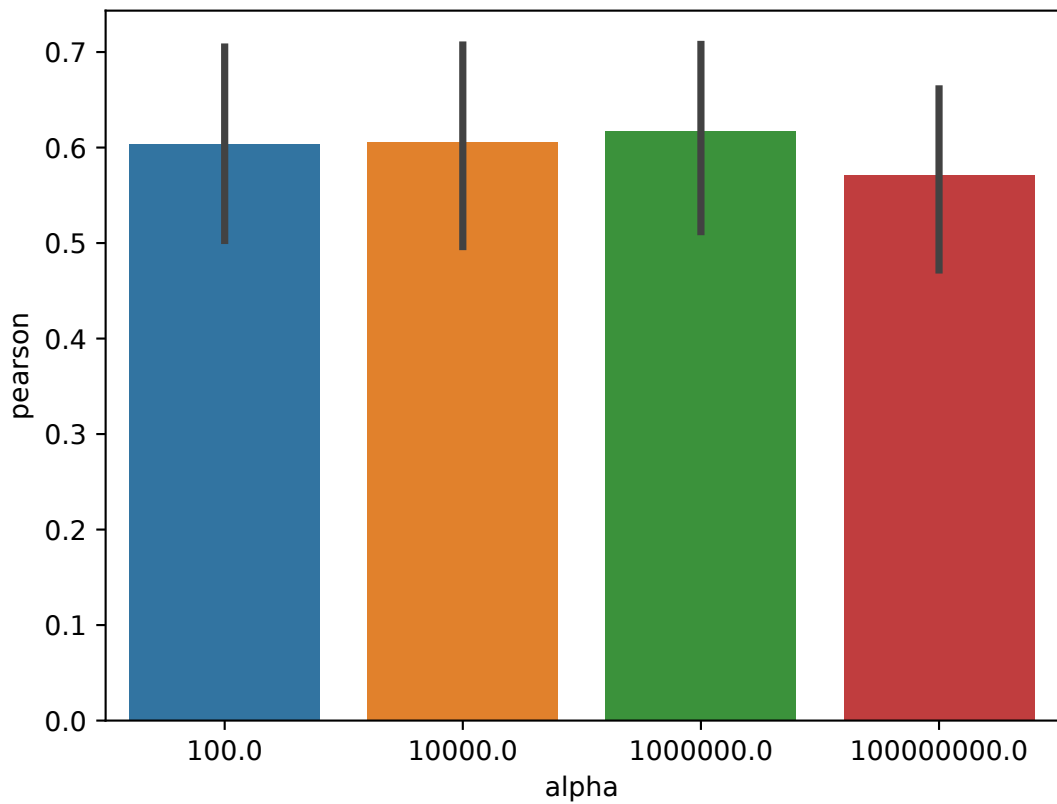

Supplement: Supplemental_Code_S3.tgz.zip [file pearson.pdf › TGIF_evaluation_scripts_by_supp_figure/SuppFig18BC/pearson.pdf]

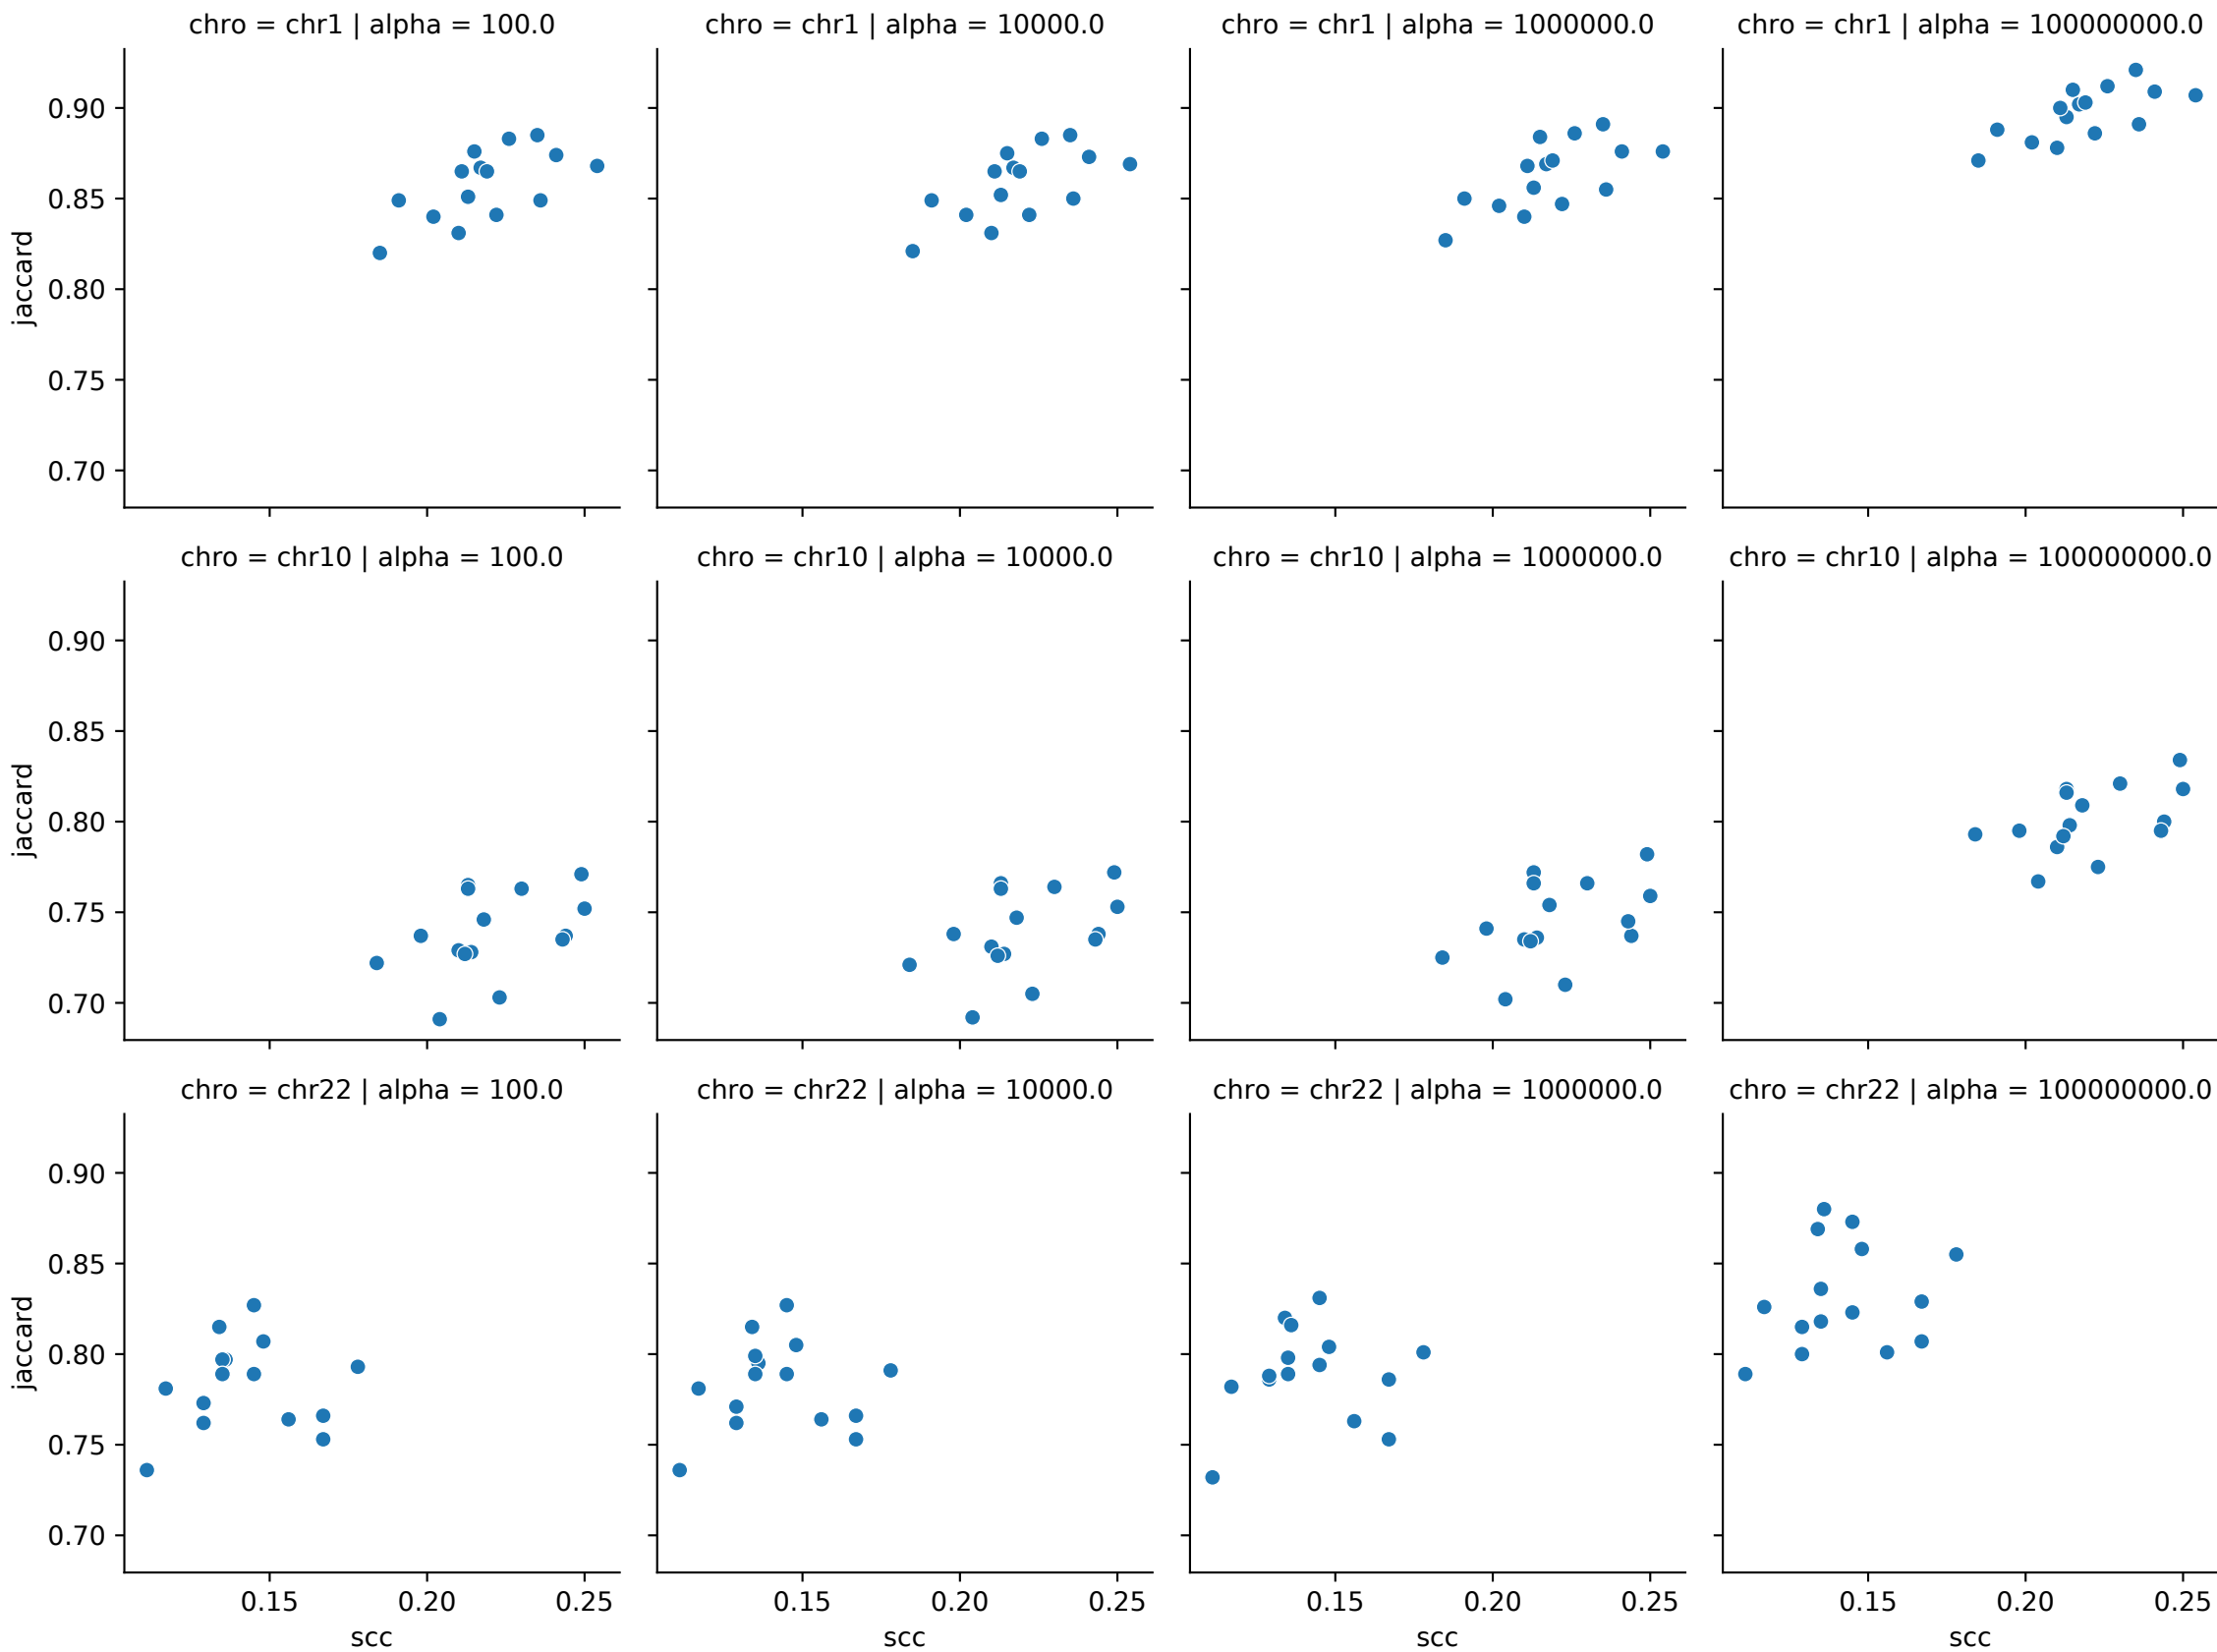

Supplement: Supplemental_Code_S3.tgz.zip [file scc_vs_jaccard.pdf › TGIF_evaluation_scripts_by_supp_figure/SuppFig18BC/scc_vs_jaccard.pdf]

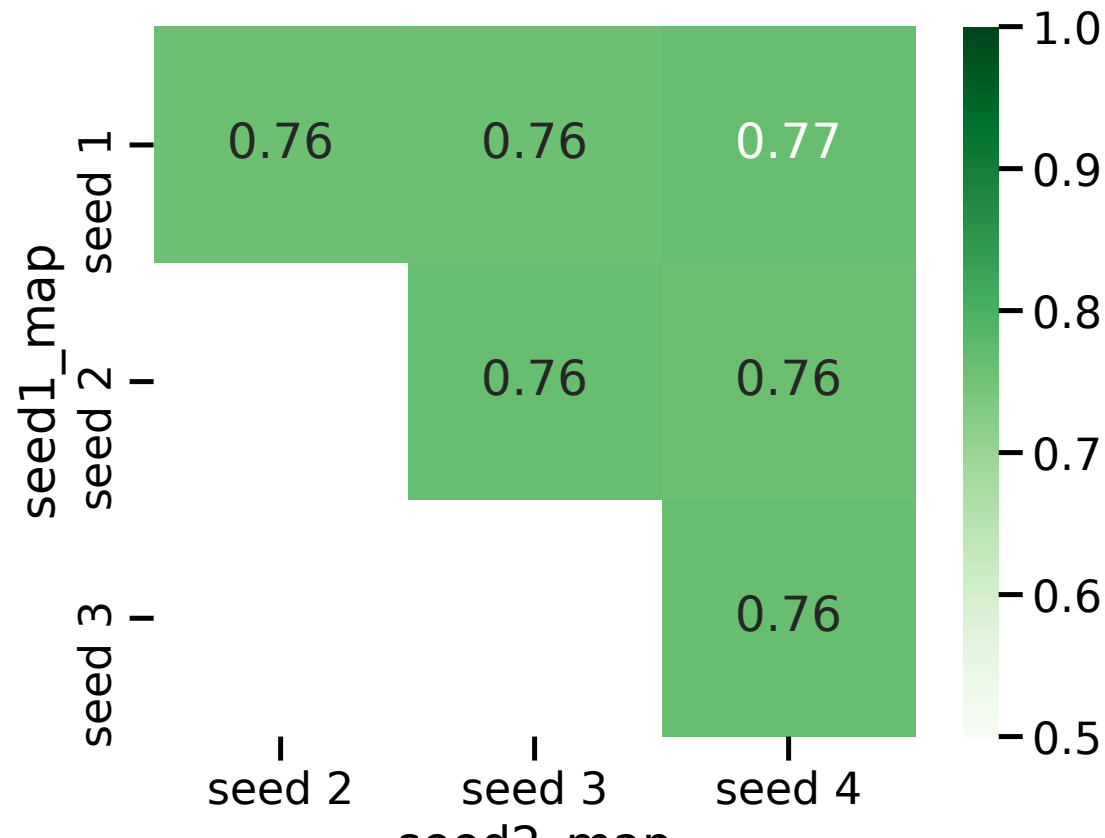

Supplement: Supplemental_Code_S3.tgz.zip [file interseed_similarity.pdf › TGIF_evaluation_scripts_by_supp_figure/SuppFig18D/interseed_similarity.pdf]

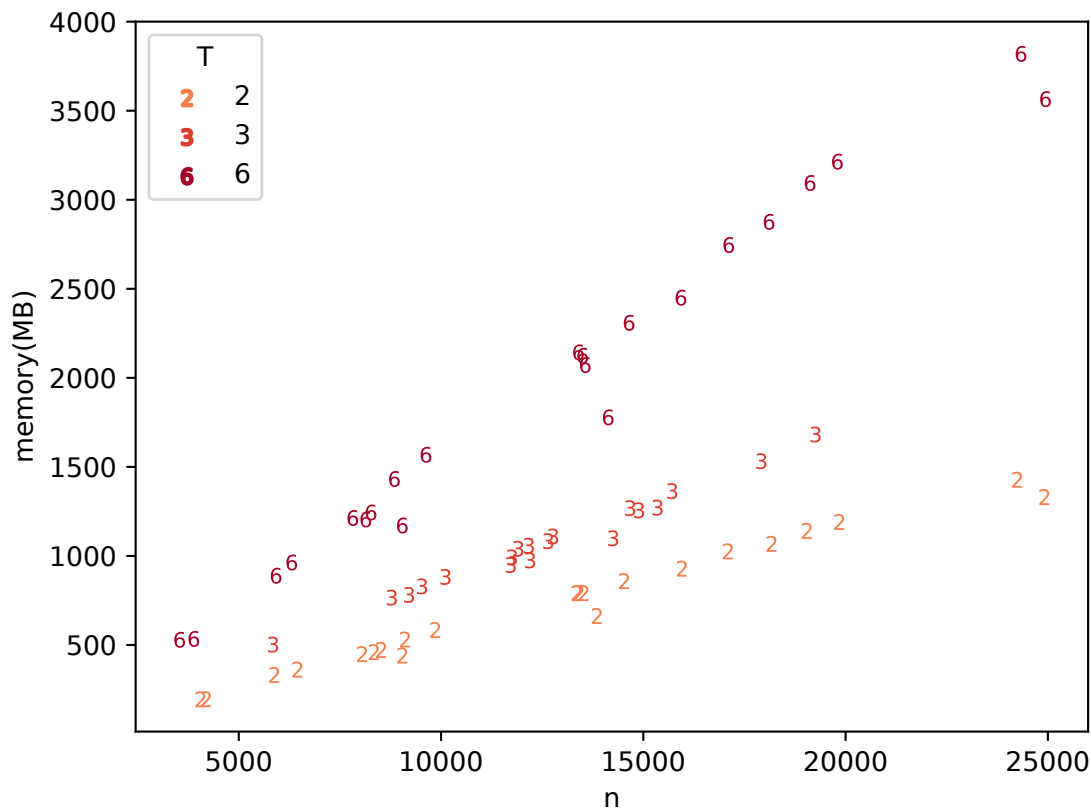

Supplement: Supplemental_Code_S3.tgz.zip [file db_memory.pdf › TGIF_evaluation_scripts_by_supp_figure/SuppFig19_and_SuppFig21/db_memory.pdf]

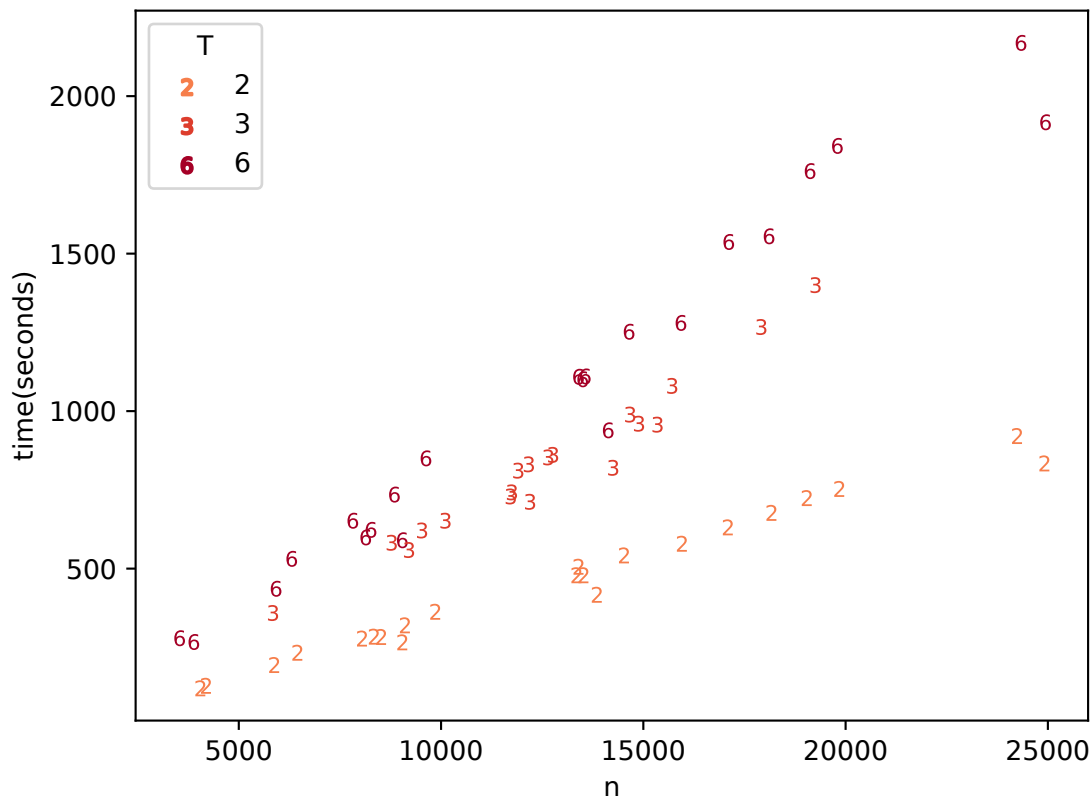

Supplement: Supplemental_Code_S3.tgz.zip [file db_time.pdf › TGIF_evaluation_scripts_by_supp_figure/SuppFig19_and_SuppFig21/db_time.pdf]

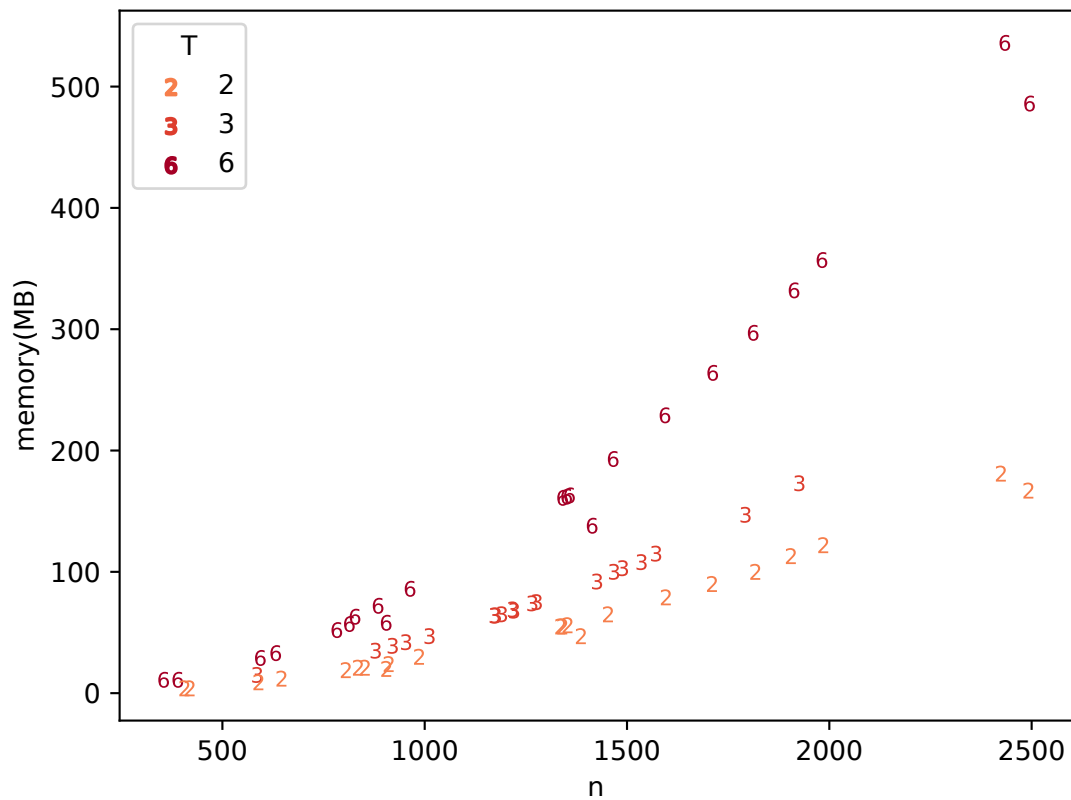

Supplement: Supplemental_Code_S3.tgz.zip [file dc_memory.pdf › TGIF_evaluation_scripts_by_supp_figure/SuppFig19_and_SuppFig21/dc_memory.pdf]

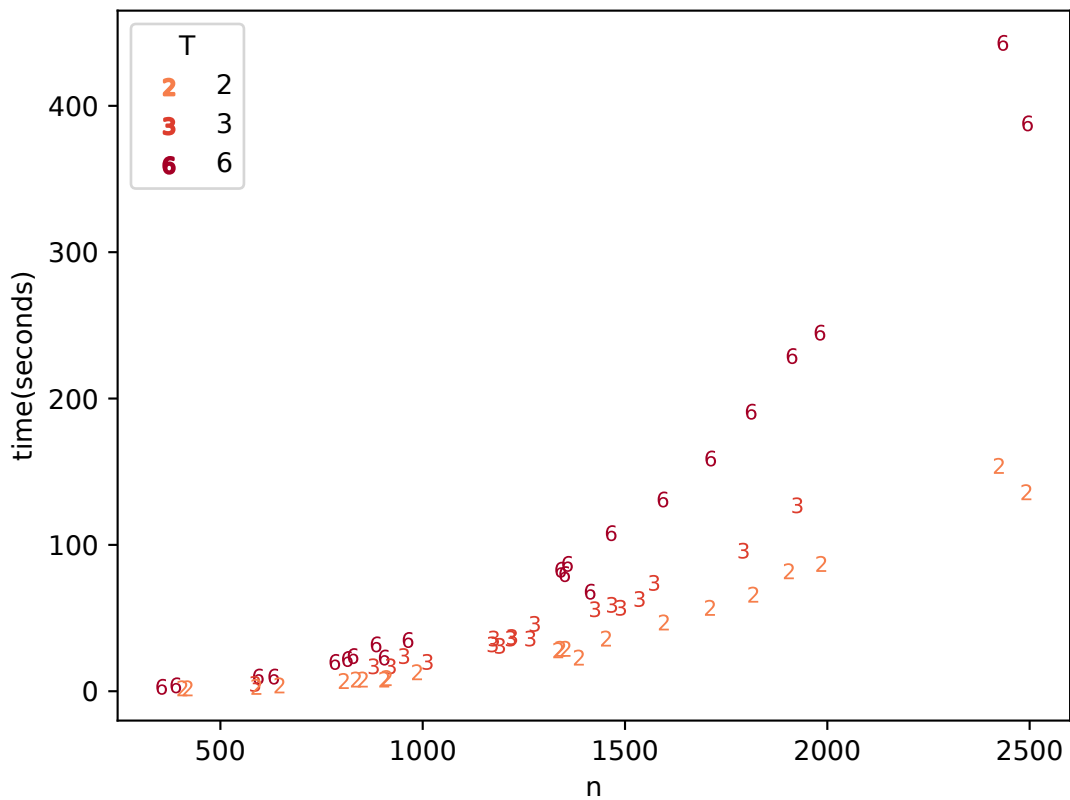

Supplement: Supplemental_Code_S3.tgz.zip [file dc_time.pdf › TGIF_evaluation_scripts_by_supp_figure/SuppFig19_and_SuppFig21/dc_time.pdf]



Supplement: Supplemental_Code_S3.tgz.zip [file dendrogram.pdf › TGIF_evaluation_scripts_by_supp_figure/SuppFig2/dendrogram.pdf]

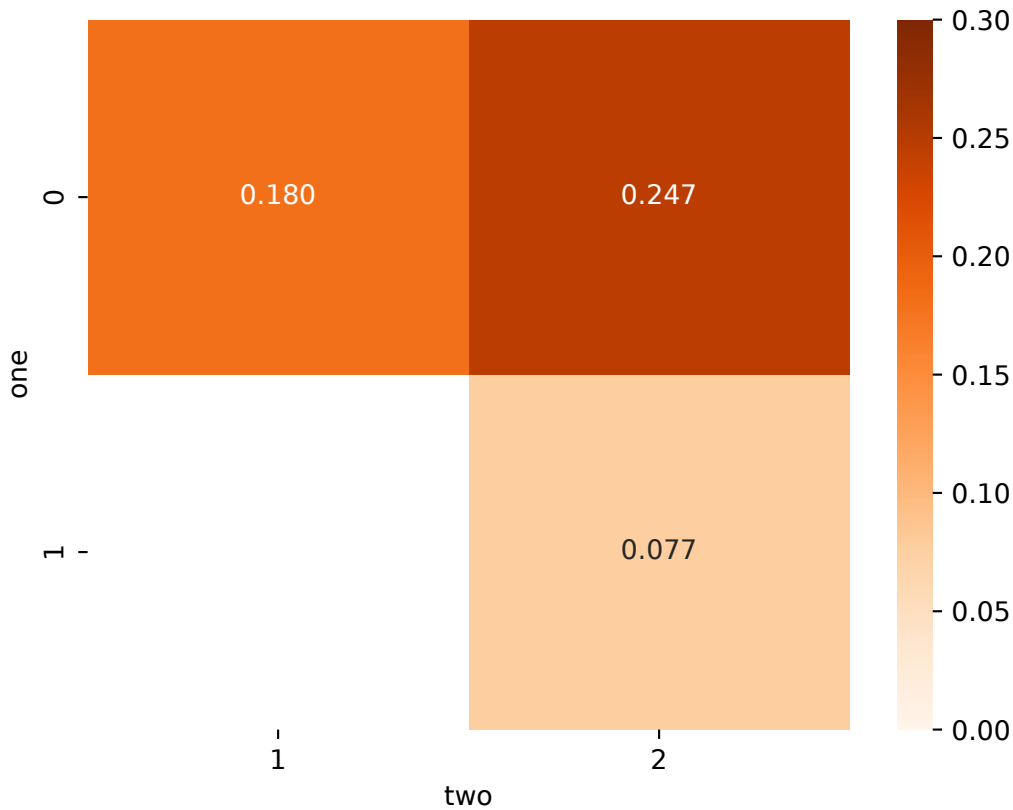

Supplement: Supplemental_Code_S3.tgz.zip [file dist.pdf › TGIF_evaluation_scripts_by_supp_figure/SuppFig2/dist.pdf]

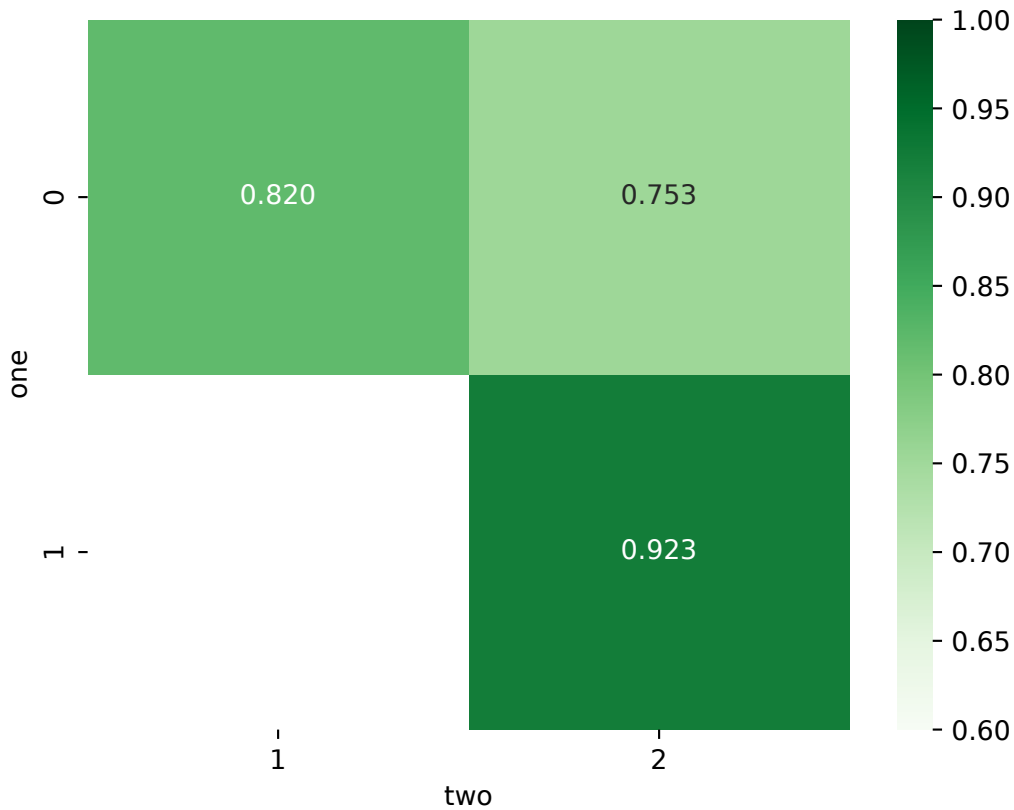

Supplement: Supplemental_Code_S3.tgz.zip [file scc.pdf › TGIF_evaluation_scripts_by_supp_figure/SuppFig2/scc.pdf]

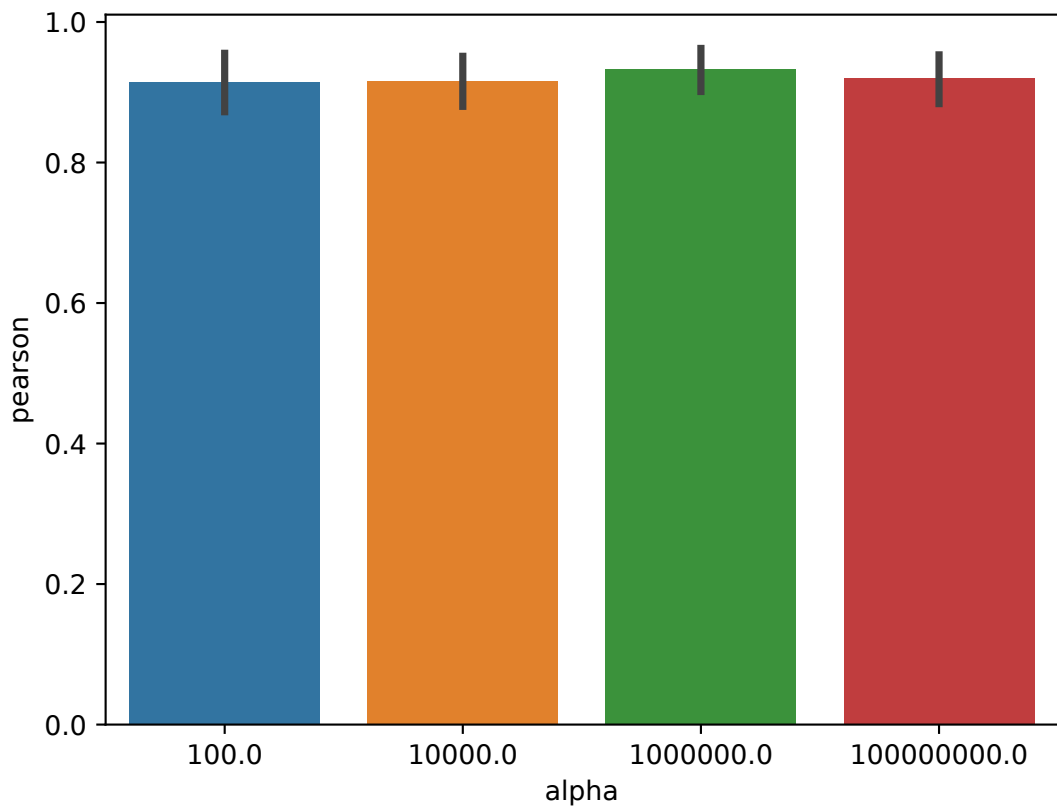

Supplement: Supplemental_Code_S3.tgz.zip [file pearson.pdf › TGIF_evaluation_scripts_by_supp_figure/SuppFig20BC/pearson.pdf]

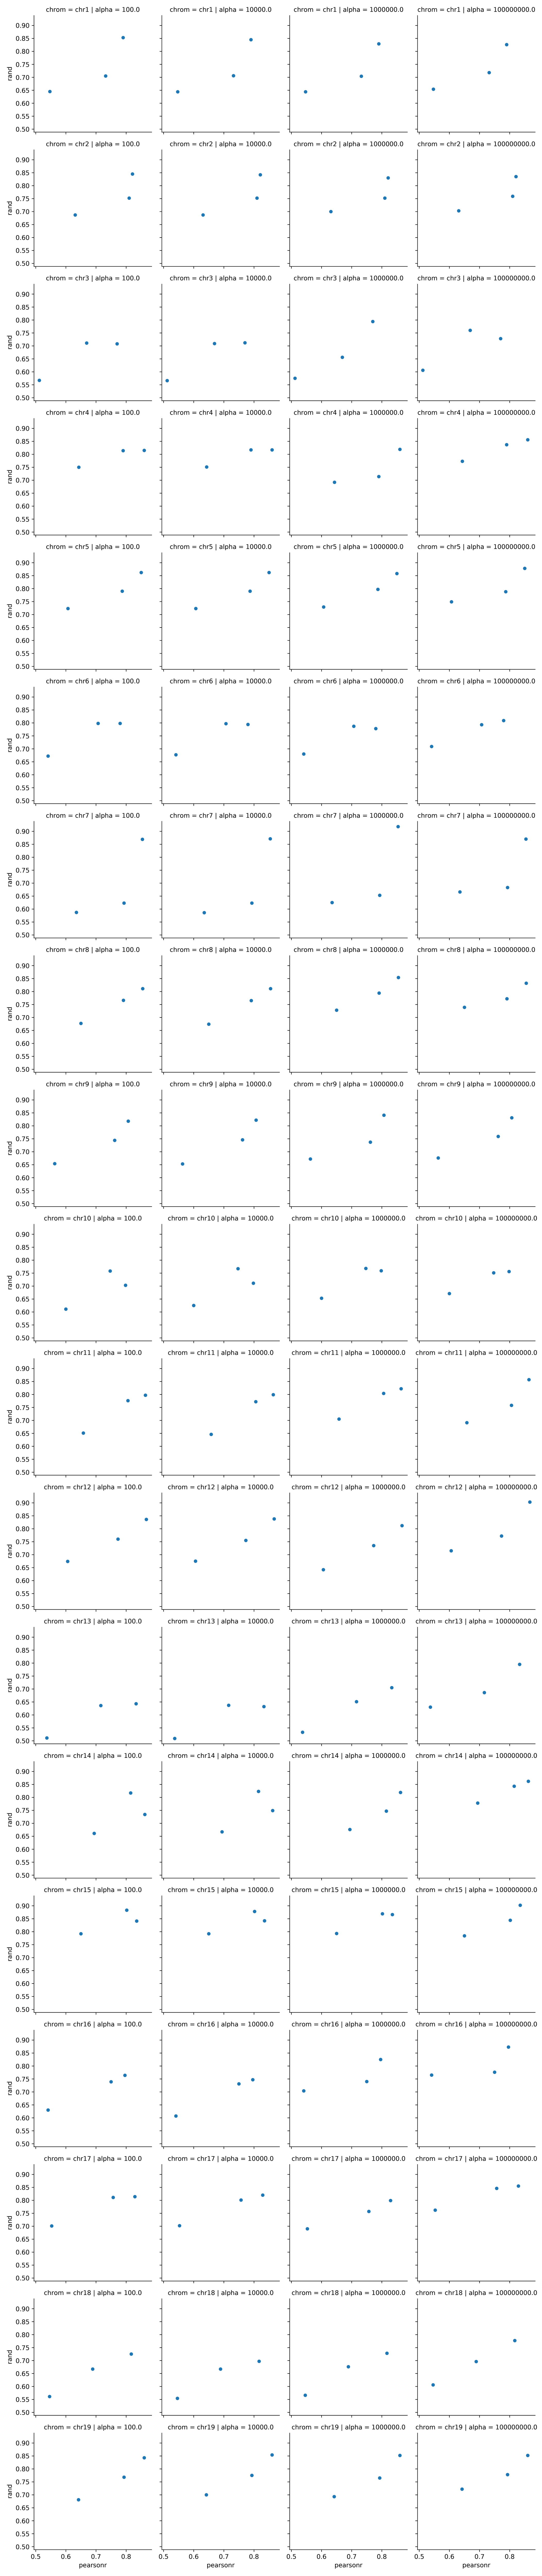

Supplement: Supplemental_Code_S3.tgz.zip [file pearsonr_vs_rand.pdf › TGIF_evaluation_scripts_by_supp_figure/SuppFig20BC/pearsonr_vs_rand.pdf]

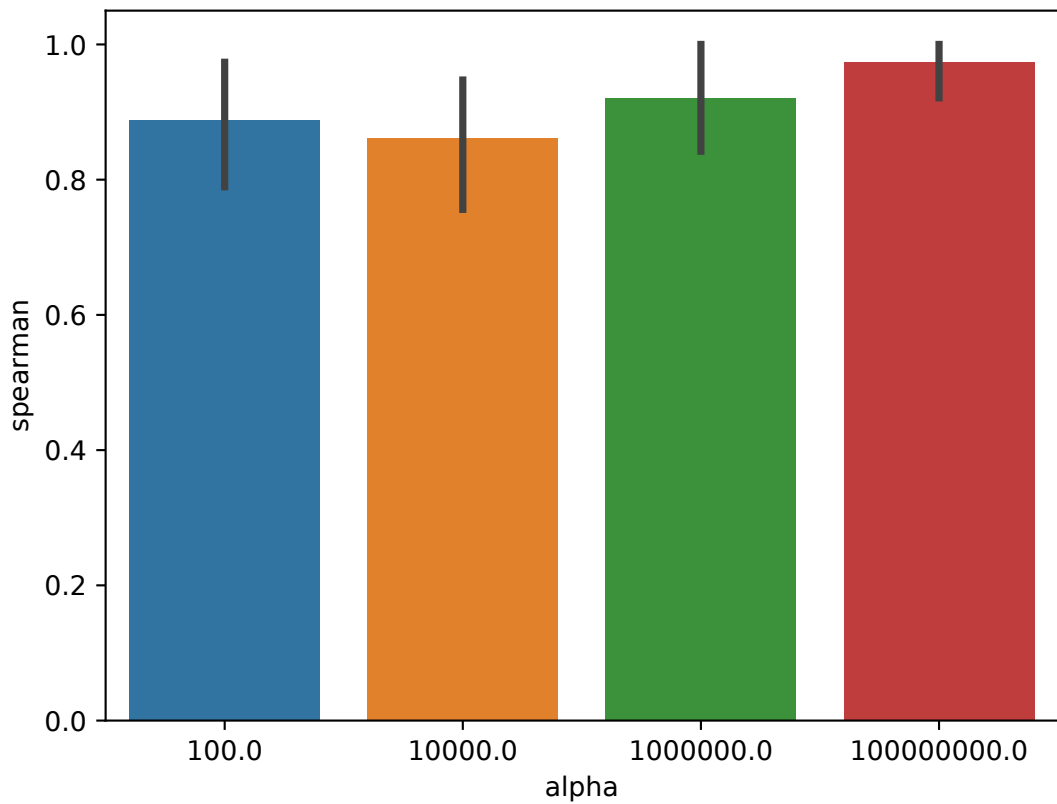

Supplement: Supplemental_Code_S3.tgz.zip [file spearman.pdf › TGIF_evaluation_scripts_by_supp_figure/SuppFig20BC/spearman.pdf]

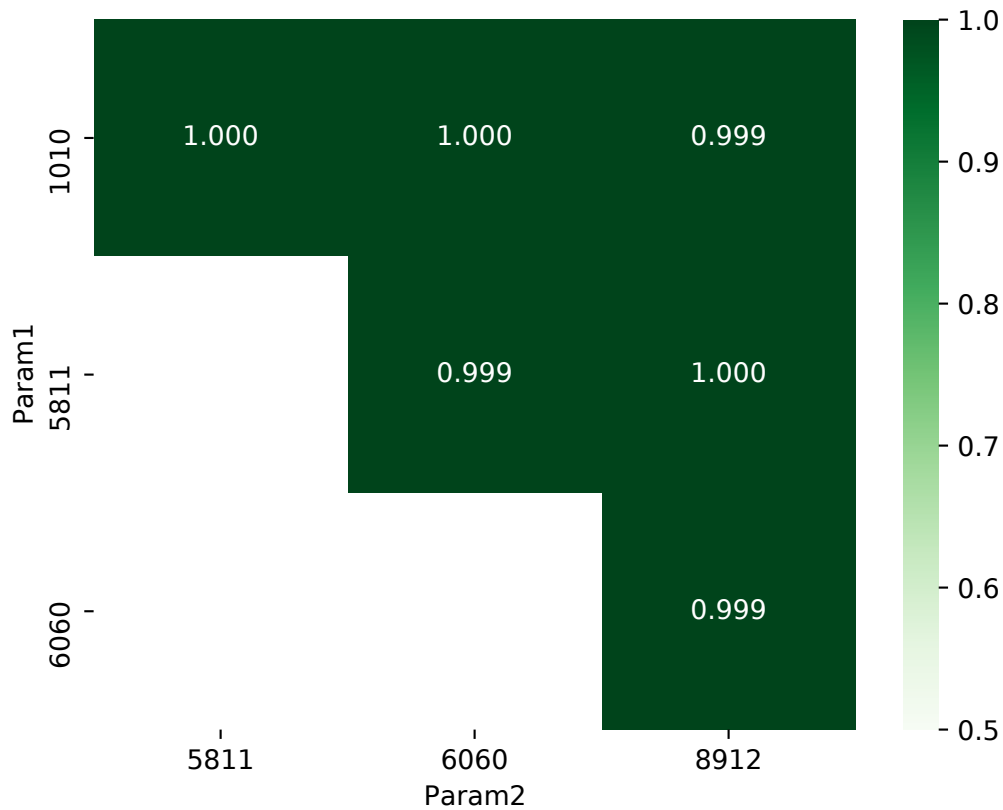

Supplement: Supplemental_Code_S3.tgz.zip [file seed.pdf › TGIF_evaluation_scripts_by_supp_figure/SuppFig20DE/seed.pdf]

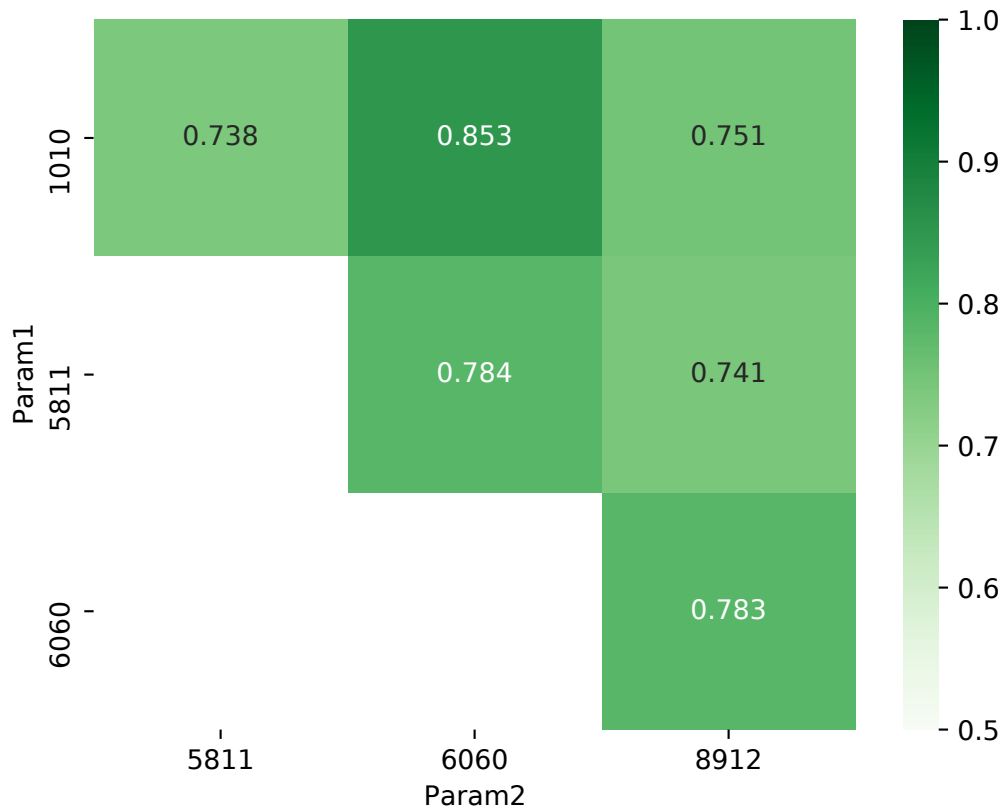

Supplement: Supplemental_Code_S3.tgz.zip [file seed_subcomp.pdf › TGIF_evaluation_scripts_by_supp_figure/SuppFig20DE/seed_subcomp.pdf]

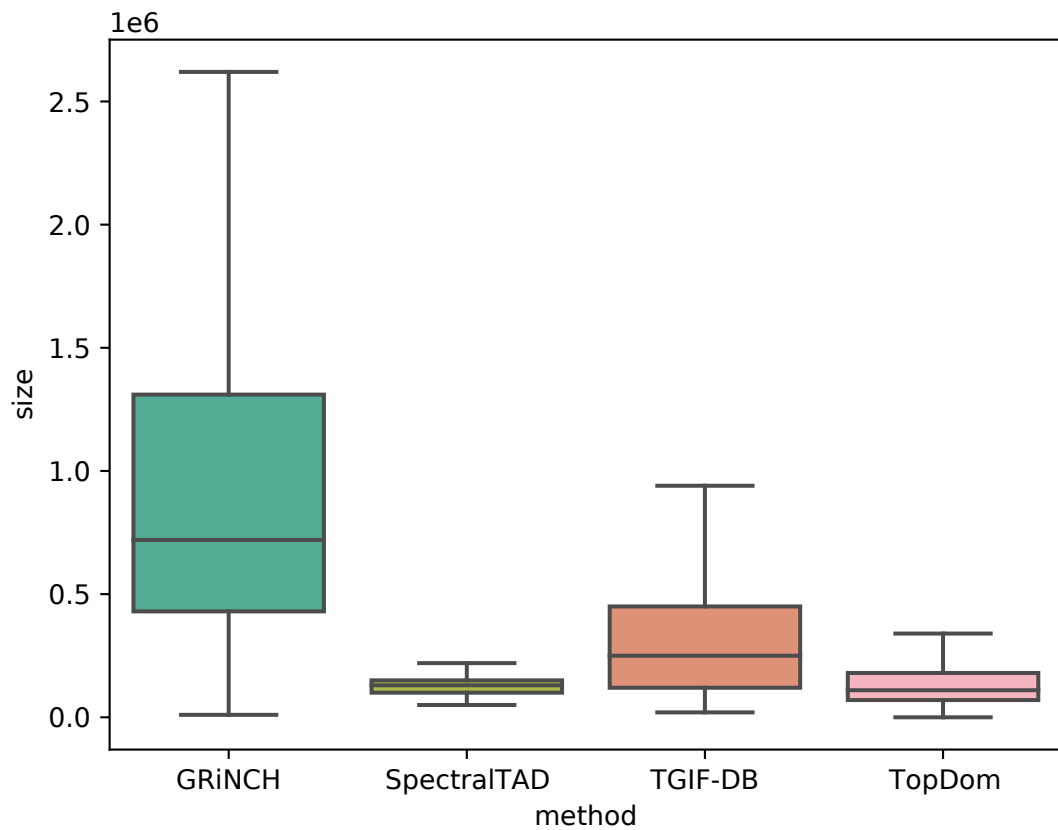

Supplement: Supplemental_Code_S3.tgz.zip [file tad_sizes.pdf › TGIF_evaluation_scripts_by_supp_figure/SuppFig22/tad_sizes.pdf]

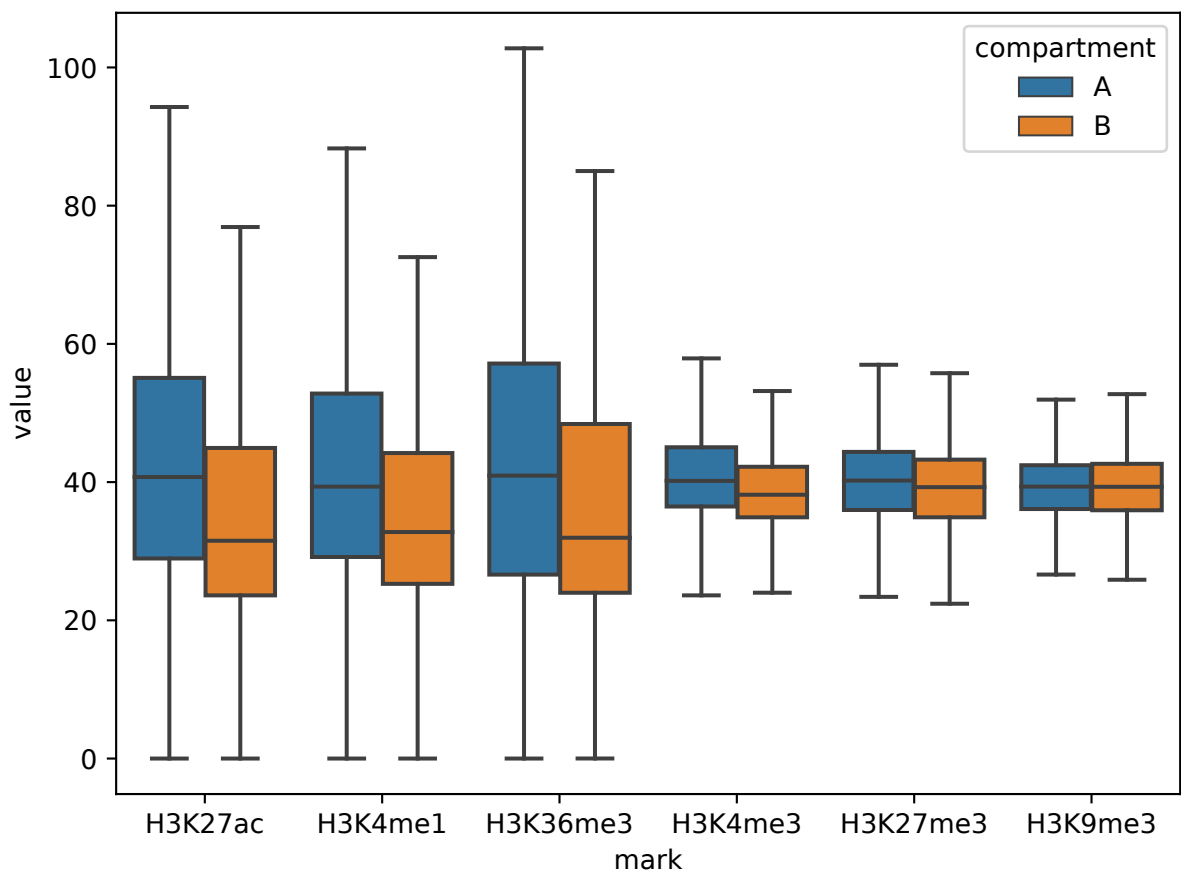

Supplement: Supplemental_Code_S3.tgz.zip [file histone_distribution_overall.pdf › TGIF_evaluation_scripts_by_supp_figure/SuppFig23/histone_distribution_overall.pdf]

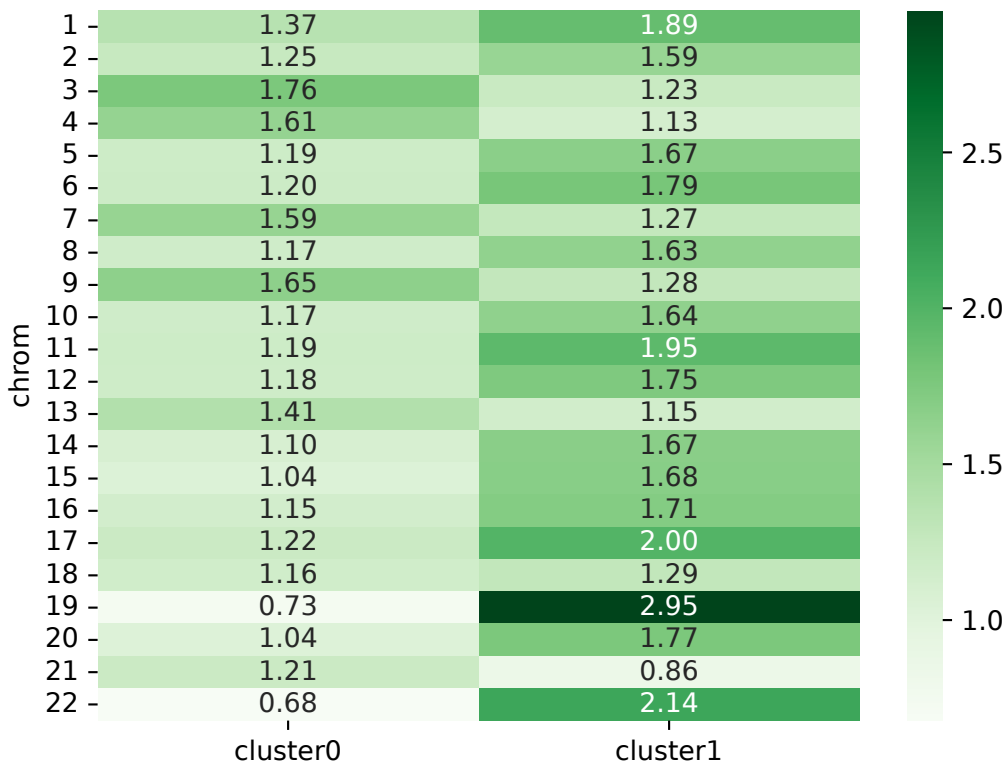

Supplement: Supplemental_Code_S3.tgz.zip [file mean_atac_per_cluster_H1.pdf › TGIF_evaluation_scripts_by_supp_figure/SuppFig24AB/figures/mean_atac_per_cluster_H1.pdf]

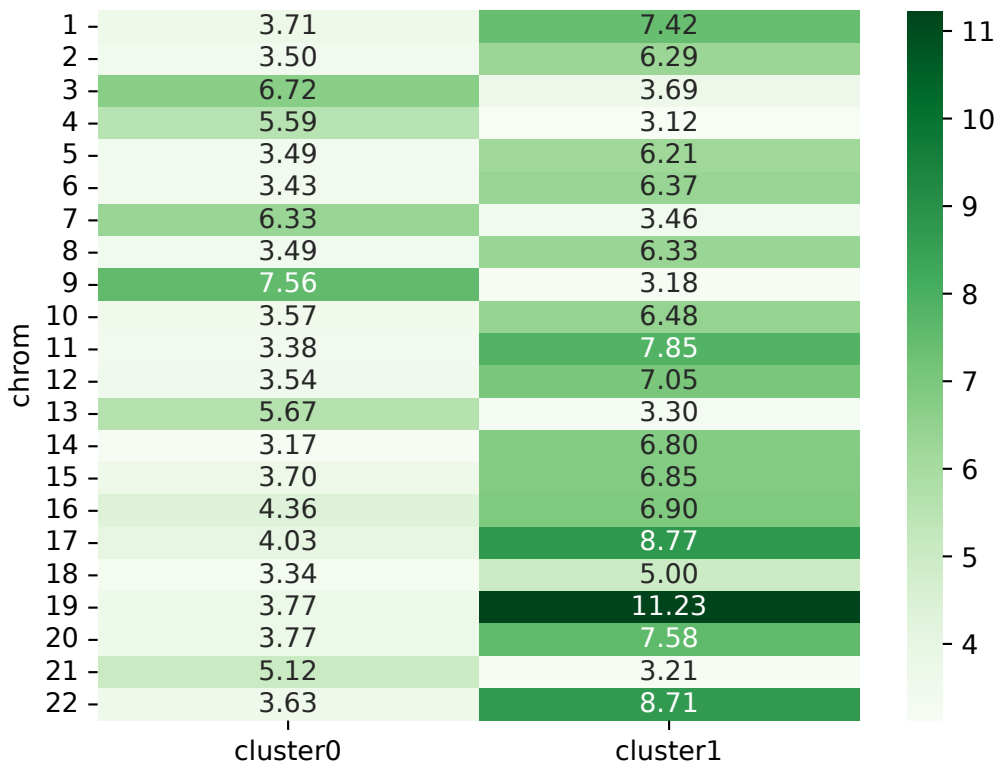

Supplement: Supplemental_Code_S3.tgz.zip [file mean_atac_per_cluster_endoderm.pdf › TGIF_evaluation_scripts_by_supp_figure/SuppFig24AB/figures/mean_atac_per_cluster_endoderm.pdf]

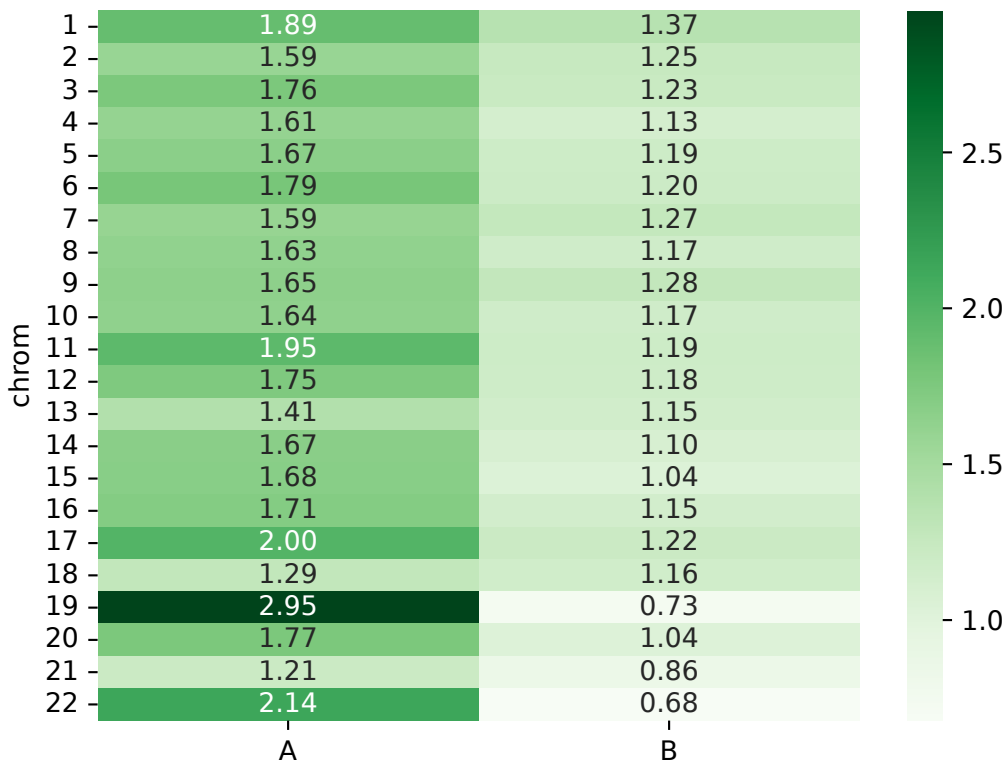

Supplement: Supplemental_Code_S3.tgz.zip [file mean_atac_per_compartment_H1.pdf › TGIF_evaluation_scripts_by_supp_figure/SuppFig24AB/figures/mean_atac_per_compartment_H1.pdf]

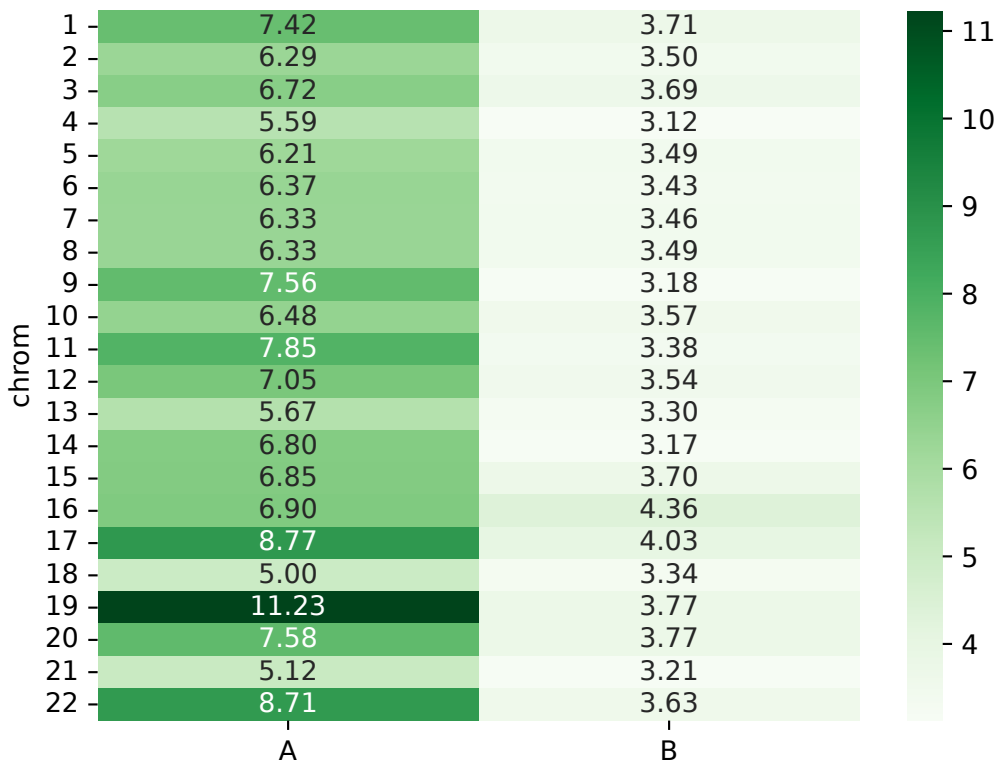

Supplement: Supplemental_Code_S3.tgz.zip [file mean_atac_per_compartment_endoderm.pdf › TGIF_evaluation_scripts_by_supp_figure/SuppFig24AB/figures/mean_atac_per_compartment_endoderm.pdf]

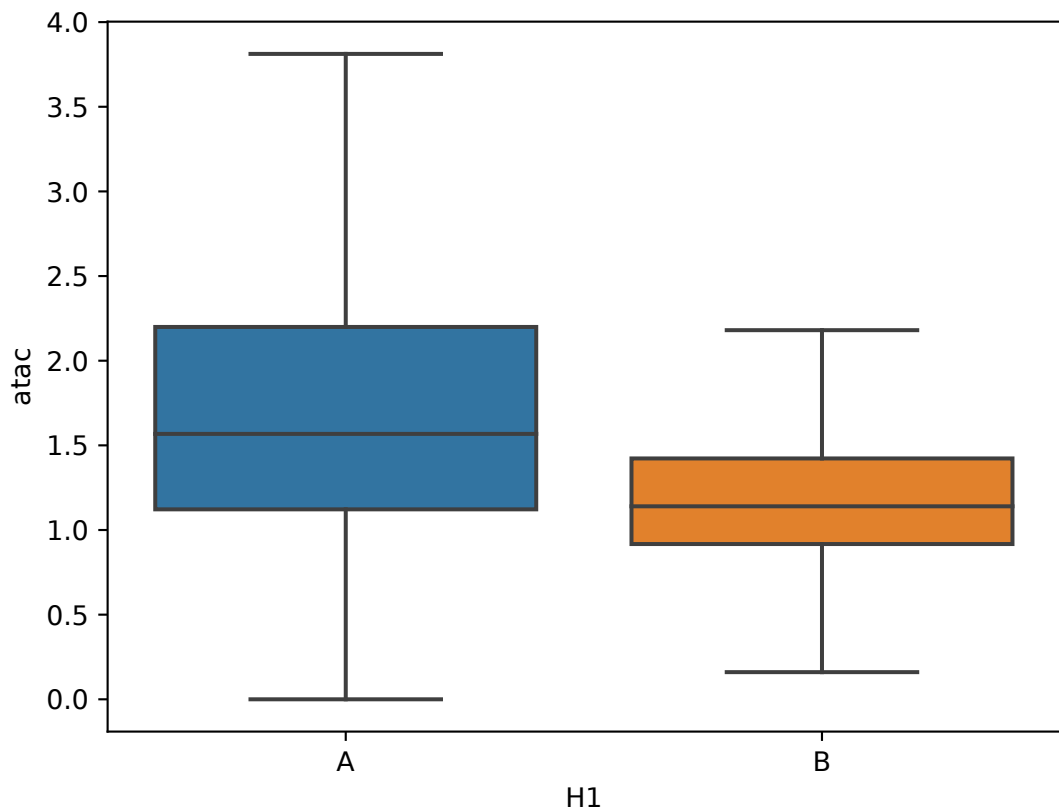

Supplement: Supplemental_Code_S3.tgz.zip [file per_compartment_H1.pdf › TGIF_evaluation_scripts_by_supp_figure/SuppFig24AB/figures/per_compartment_H1.pdf]

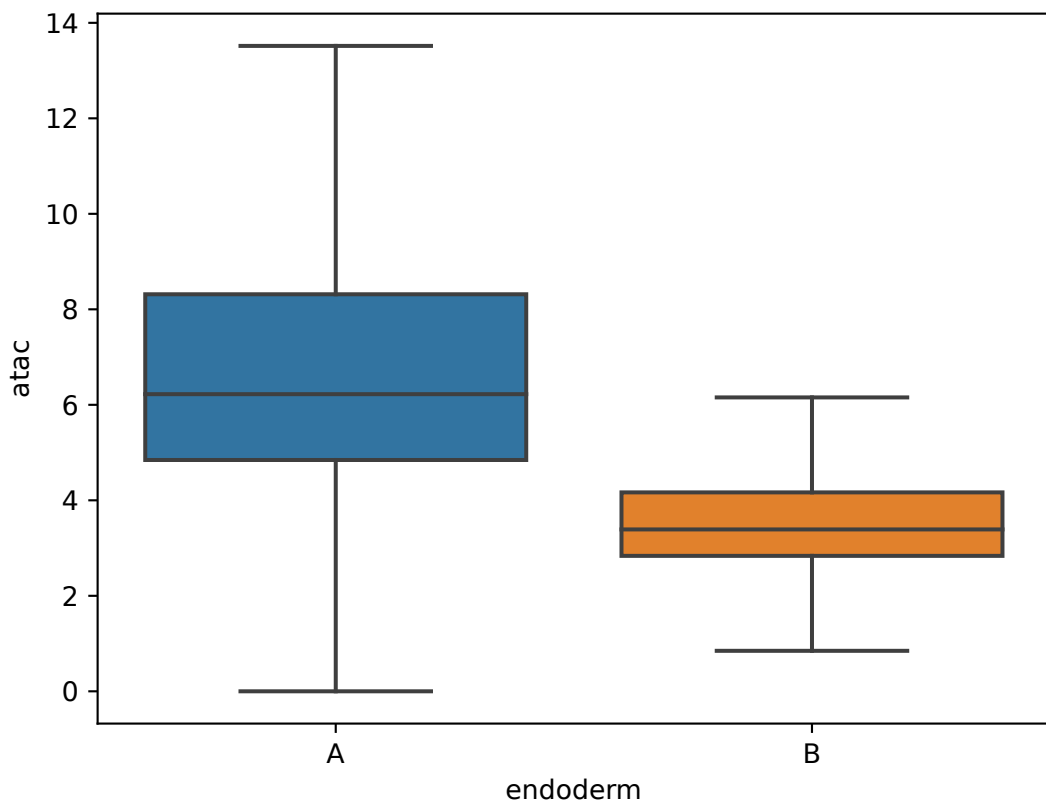

Supplement: Supplemental_Code_S3.tgz.zip [file per_compartment_endoderm.pdf › TGIF_evaluation_scripts_by_supp_figure/SuppFig24AB/figures/per_compartment_endoderm.pdf]

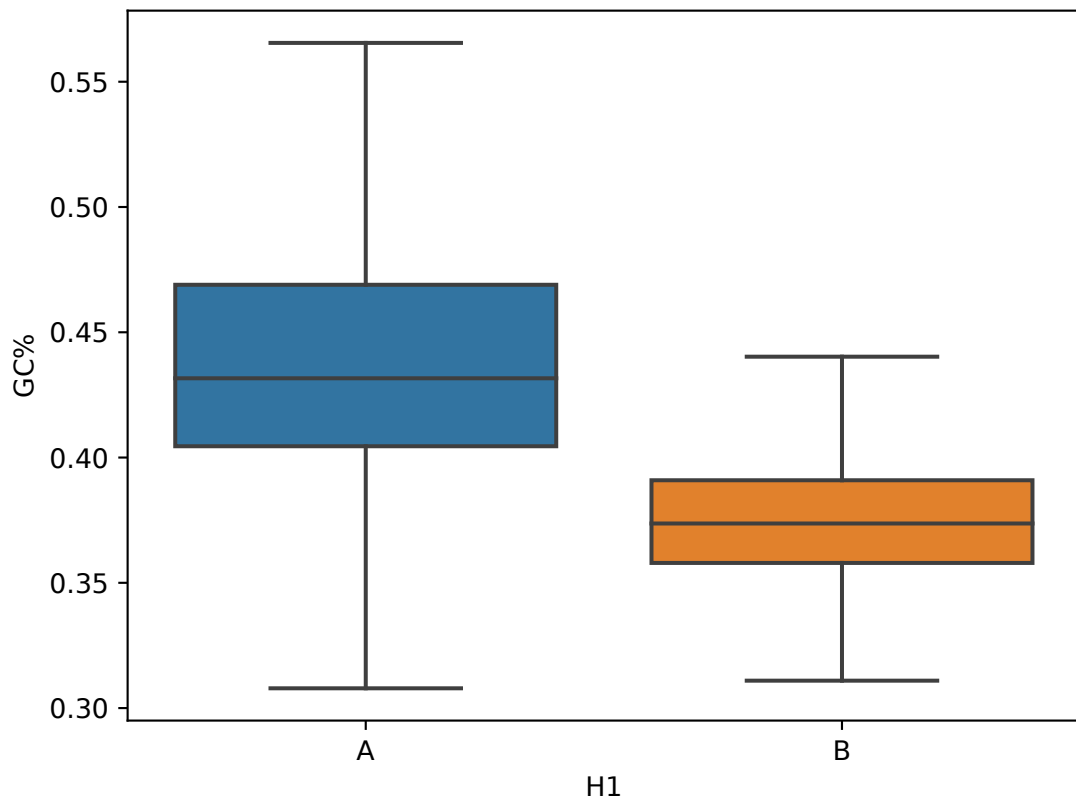

Supplement: Supplemental_Code_S3.tgz.zip [file H1_gc_content.pdf › TGIF_evaluation_scripts_by_supp_figure/SuppFig24D/H1_gc_content.pdf]

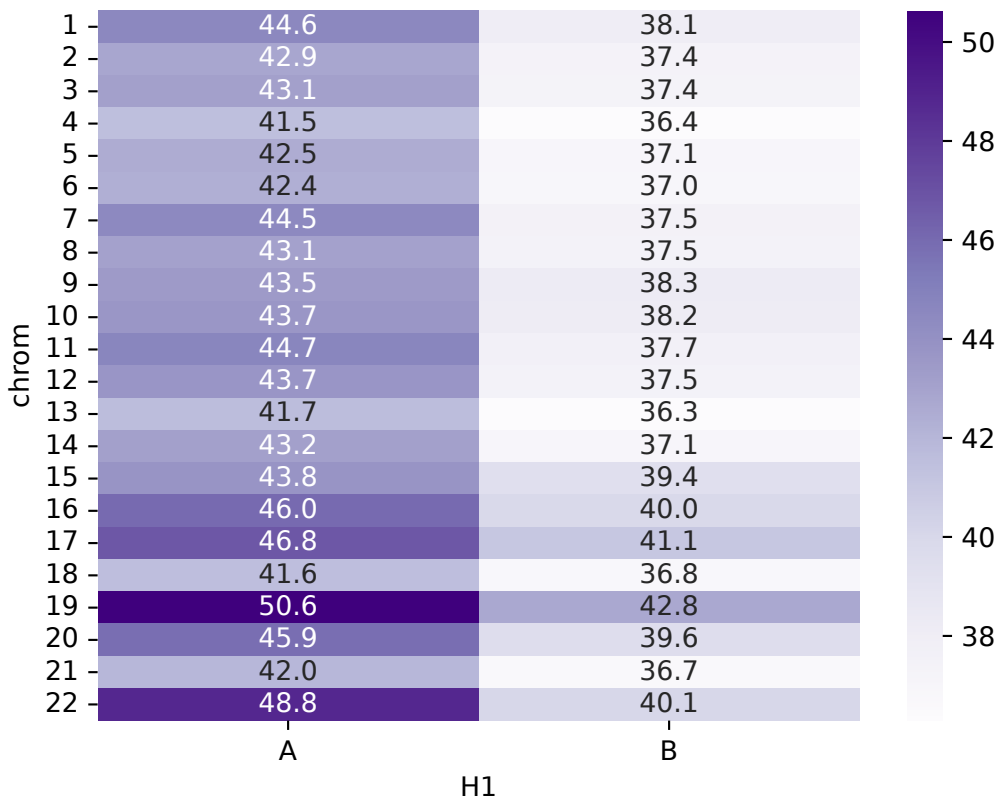

Supplement: Supplemental_Code_S3.tgz.zip [file H1_gc_per_chrom.pdf › TGIF_evaluation_scripts_by_supp_figure/SuppFig24D/H1_gc_per_chrom.pdf]

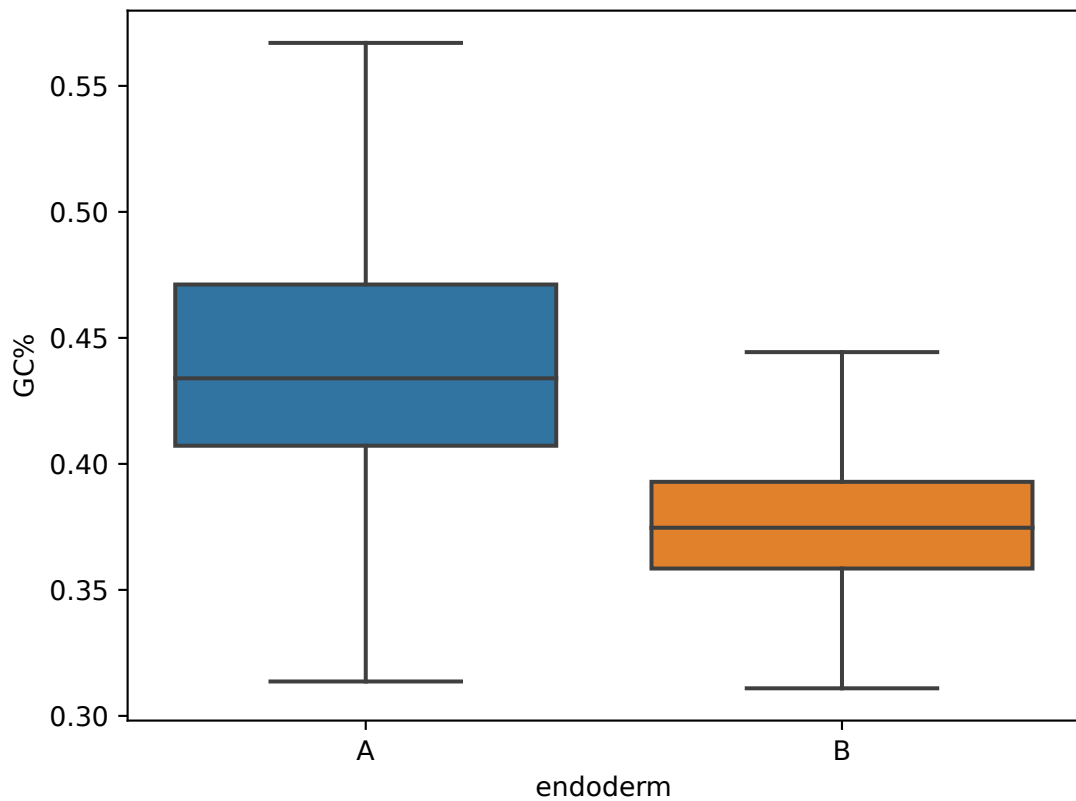

Supplement: Supplemental_Code_S3.tgz.zip [file endoderm_gc_content.pdf › TGIF_evaluation_scripts_by_supp_figure/SuppFig24D/endoderm_gc_content.pdf]

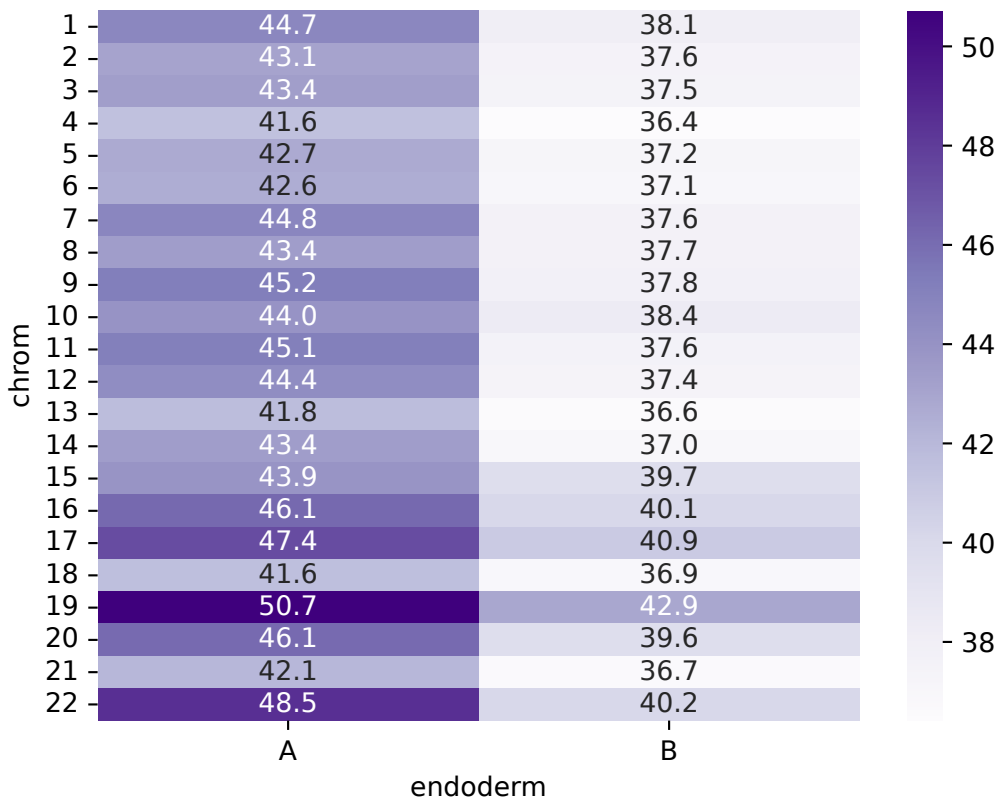

Supplement: Supplemental_Code_S3.tgz.zip [file endoderm_gc_per_chrom.pdf › TGIF_evaluation_scripts_by_supp_figure/SuppFig24D/endoderm_gc_per_chrom.pdf]

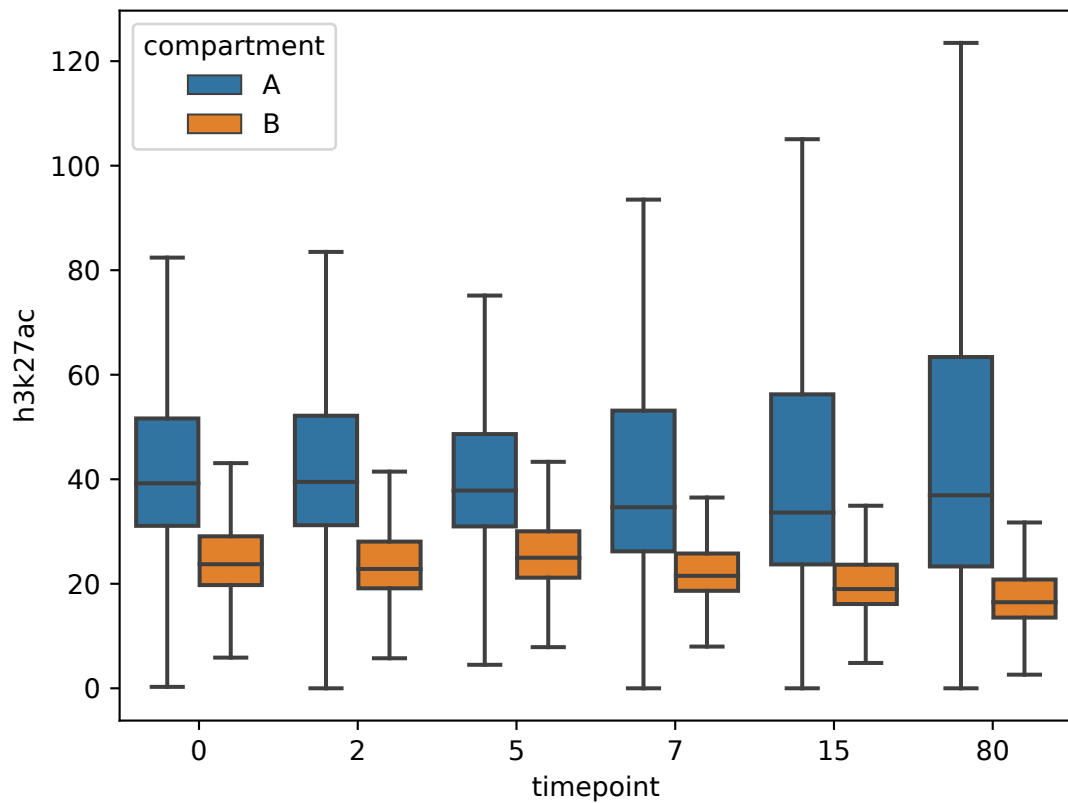

Supplement: Supplemental_Code_S3.tgz.zip [file h3k27ac.pdf › TGIF_evaluation_scripts_by_supp_figure/SuppFig25AD/figures/h3k27ac.pdf]

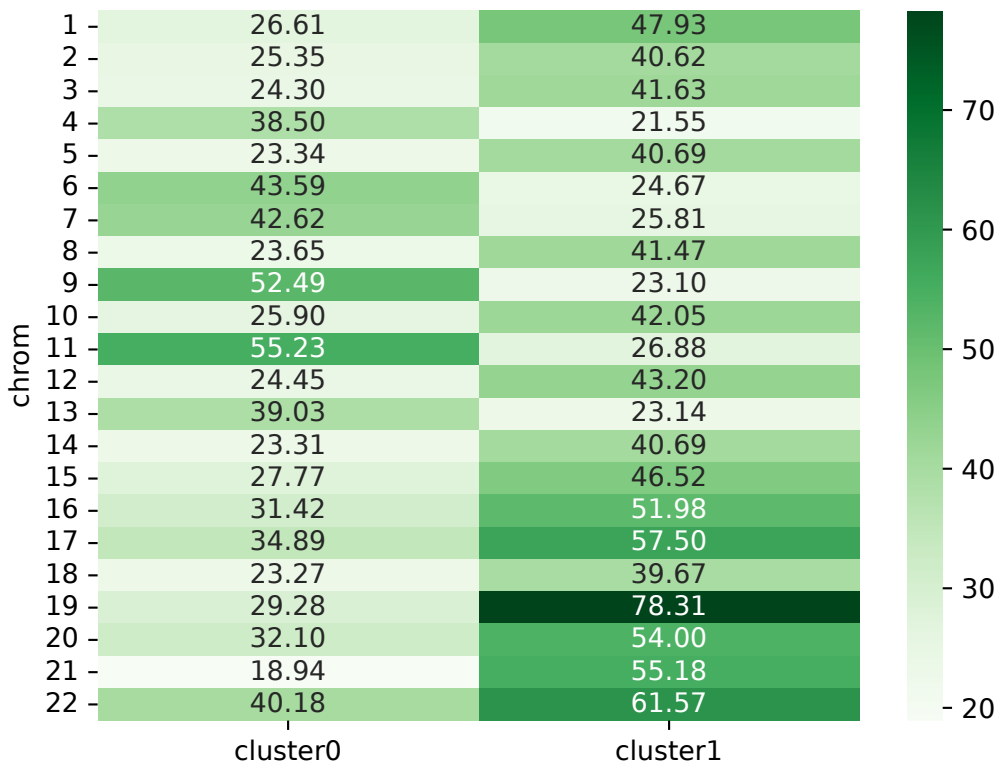

Supplement: Supplemental_Code_S3.tgz.zip [file mean_atac_per_cluster_day0.pdf › TGIF_evaluation_scripts_by_supp_figure/SuppFig25AD/figures/mean_atac_per_cluster_day0.pdf]

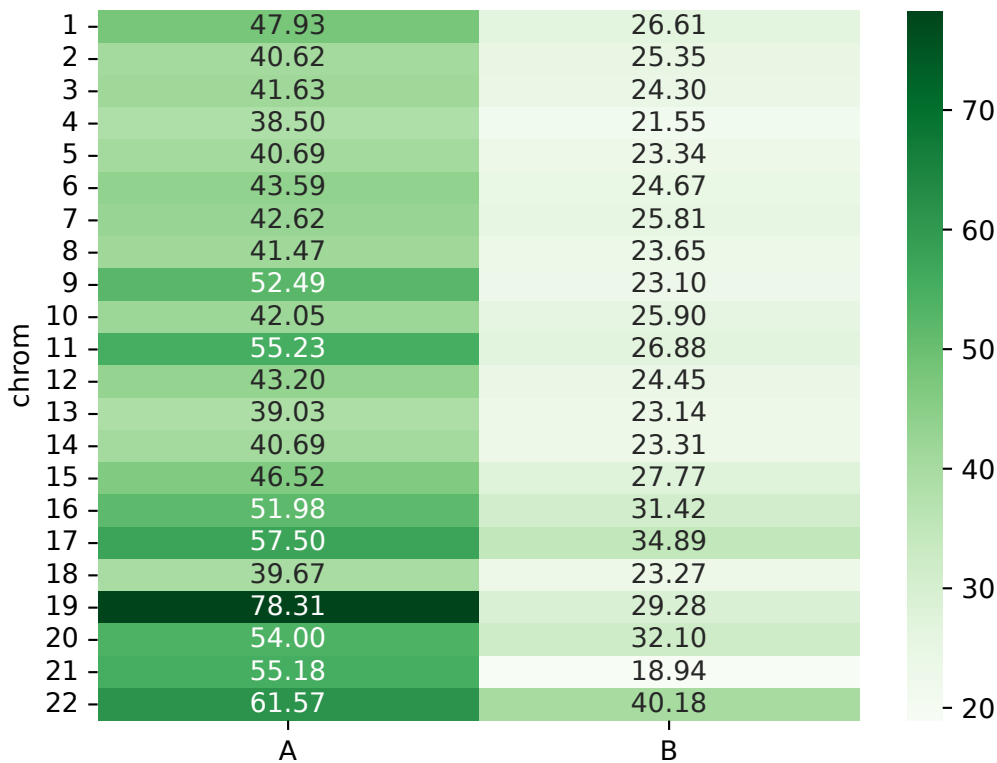

Supplement: Supplemental_Code_S3.tgz.zip [file mean_atac_per_compartment_day0.pdf › TGIF_evaluation_scripts_by_supp_figure/SuppFig25AD/figures/mean_atac_per_compartment_day0.pdf]

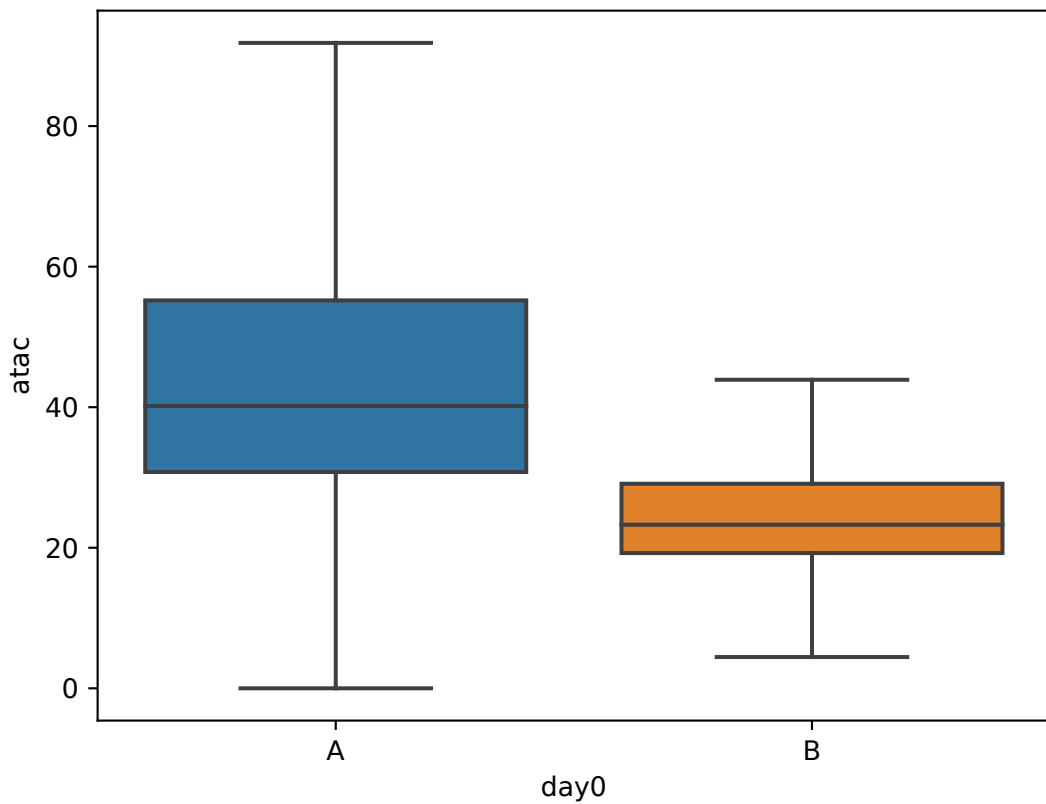

Supplement: Supplemental_Code_S3.tgz.zip [file per_compartment_day0.pdf › TGIF_evaluation_scripts_by_supp_figure/SuppFig25AD/figures/per_compartment_day0.pdf]

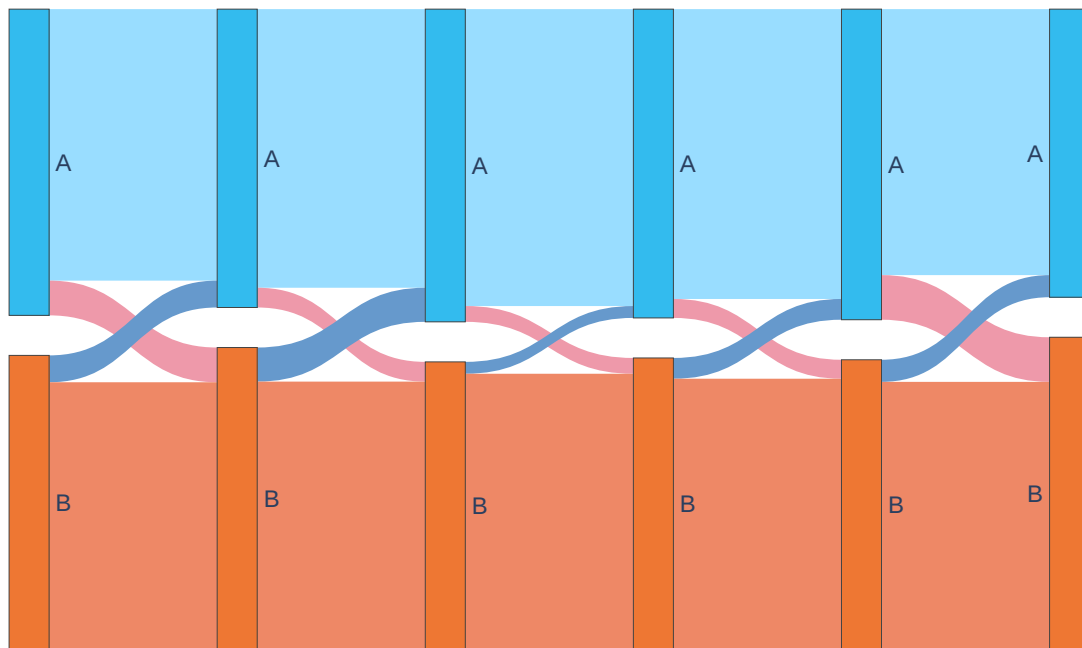

Supplement: Supplemental_Code_S3.tgz.zip [file sankey_cardio_diff.pdf › TGIF_evaluation_scripts_by_supp_figure/SuppFig25B/sankey_cardio_diff.pdf]

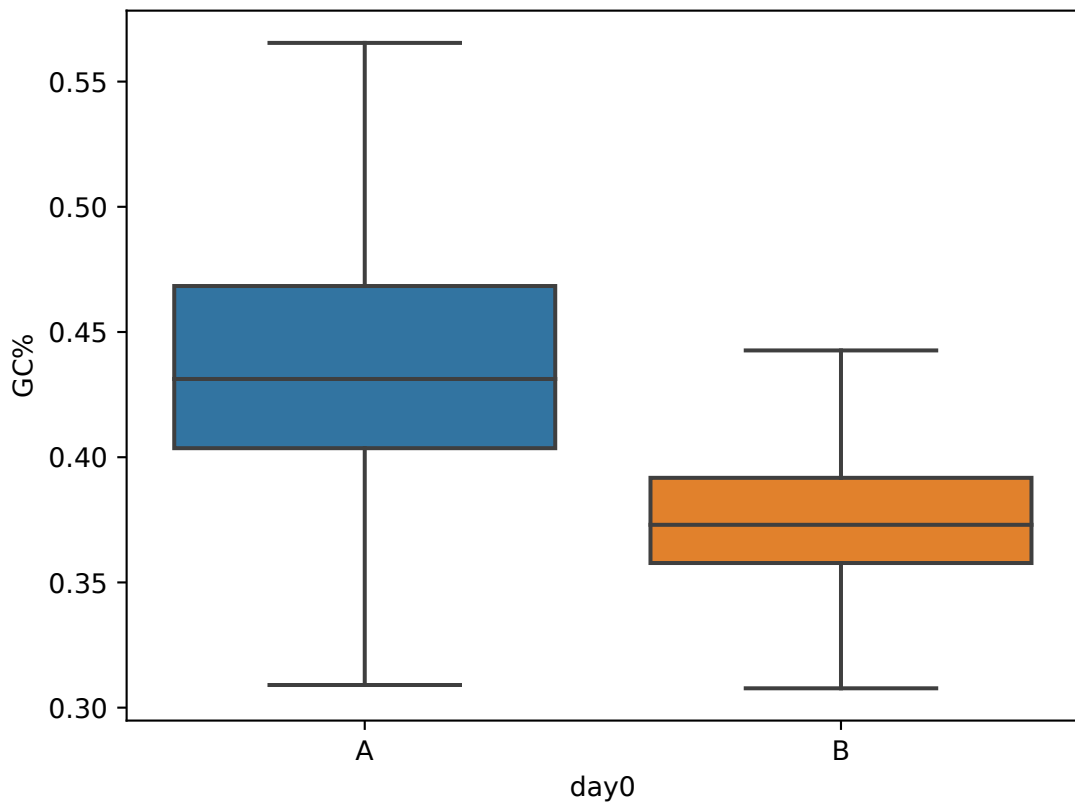

Supplement: Supplemental_Code_S3.tgz.zip [file day0_gc_content.pdf › TGIF_evaluation_scripts_by_supp_figure/SuppFig25C/figures/day0_gc_content.pdf]

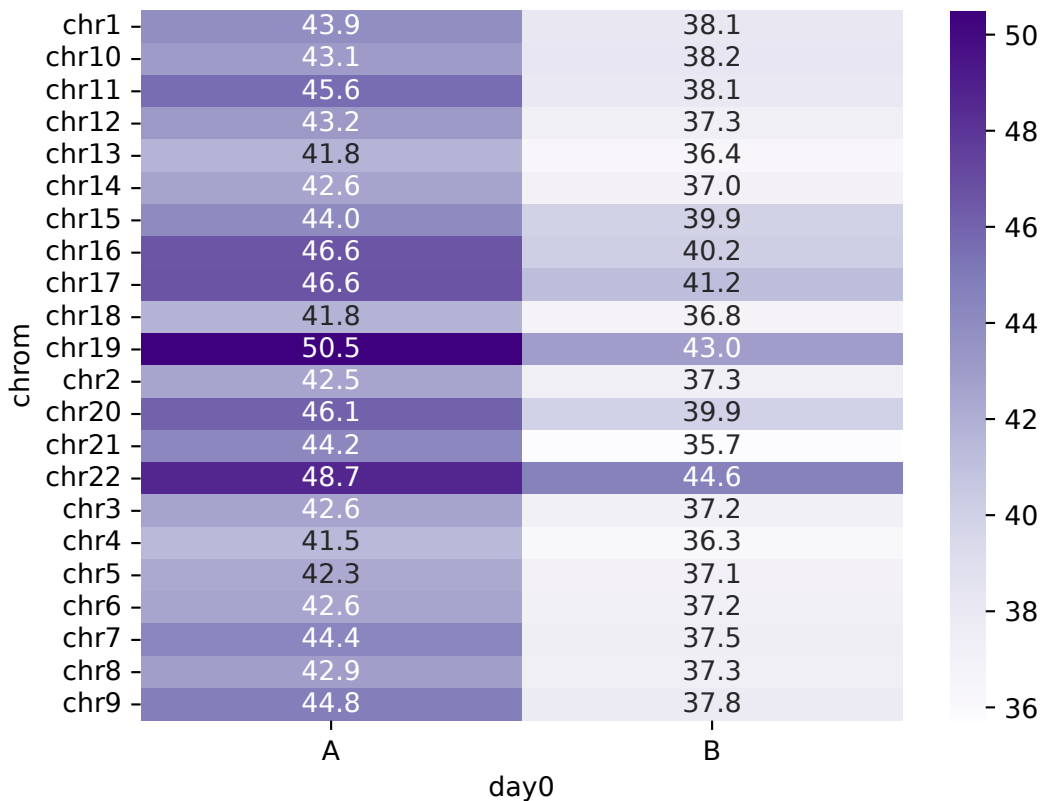

Supplement: Supplemental_Code_S3.tgz.zip [file day0_gc_per_chrom.pdf › TGIF_evaluation_scripts_by_supp_figure/SuppFig25C/figures/day0_gc_per_chrom.pdf]

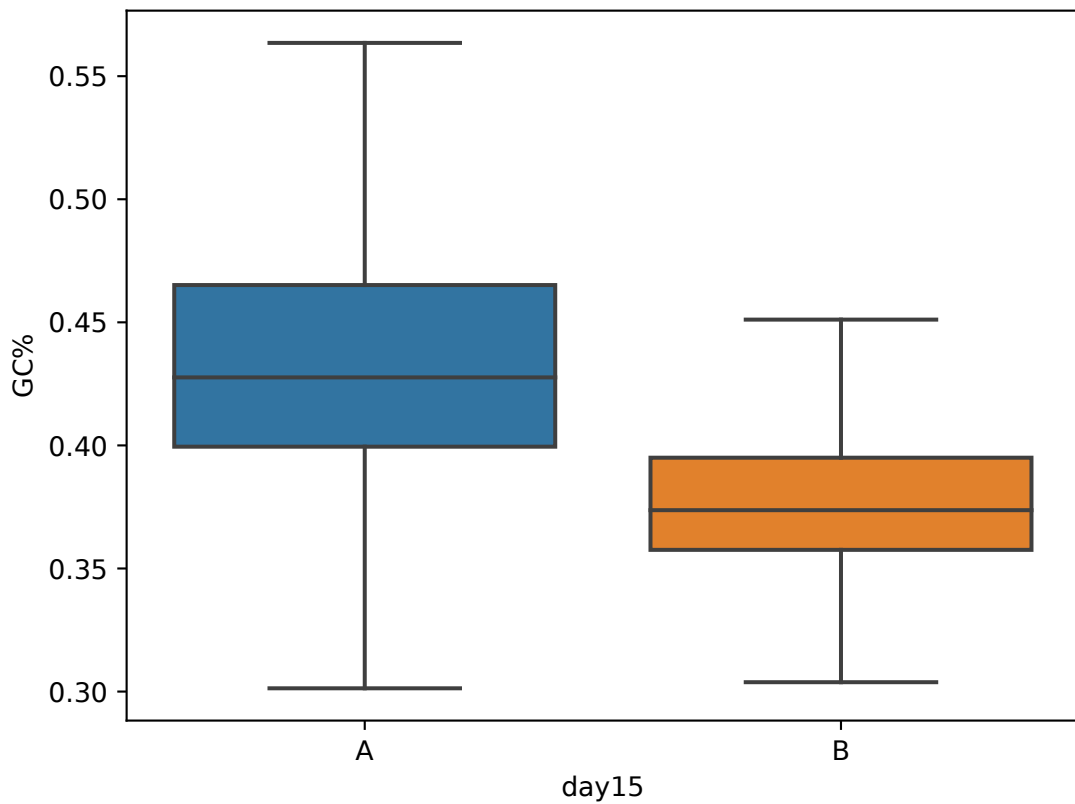

Supplement: Supplemental_Code_S3.tgz.zip [file day15_gc_content.pdf › TGIF_evaluation_scripts_by_supp_figure/SuppFig25C/figures/day15_gc_content.pdf]

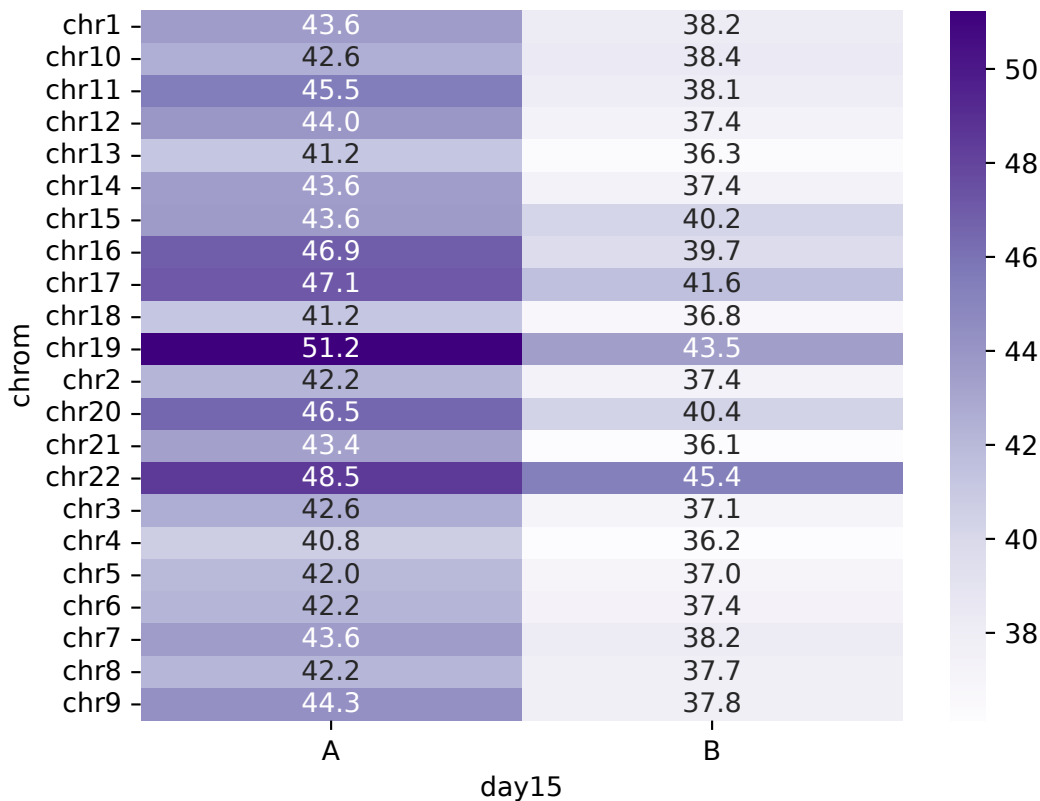

Supplement: Supplemental_Code_S3.tgz.zip [file day15_gc_per_chrom.pdf › TGIF_evaluation_scripts_by_supp_figure/SuppFig25C/figures/day15_gc_per_chrom.pdf]

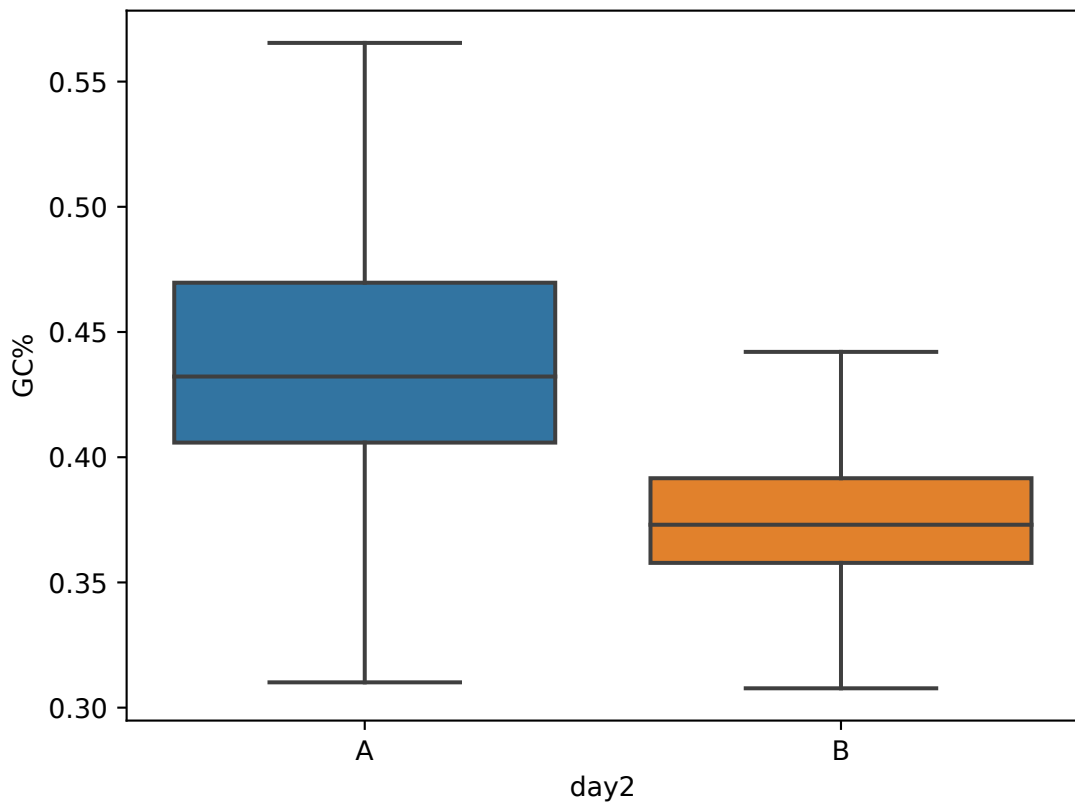

Supplement: Supplemental_Code_S3.tgz.zip [file day2_gc_content.pdf › TGIF_evaluation_scripts_by_supp_figure/SuppFig25C/figures/day2_gc_content.pdf]

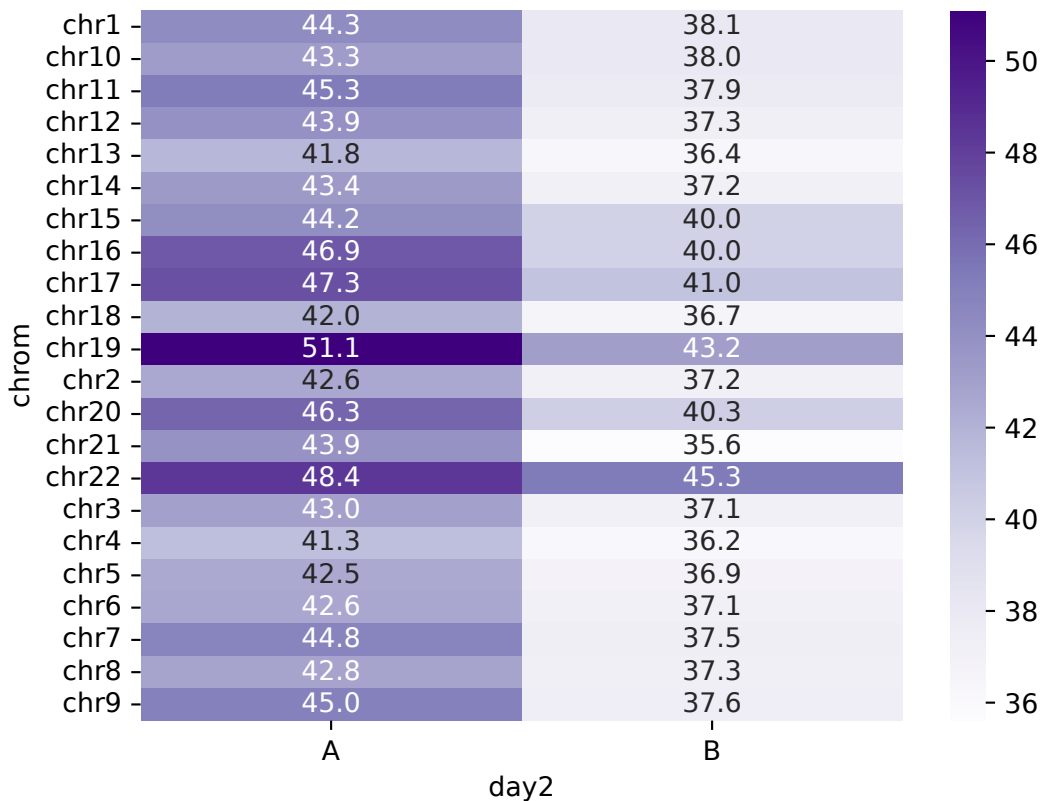

Supplement: Supplemental_Code_S3.tgz.zip [file day2_gc_per_chrom.pdf › TGIF_evaluation_scripts_by_supp_figure/SuppFig25C/figures/day2_gc_per_chrom.pdf]

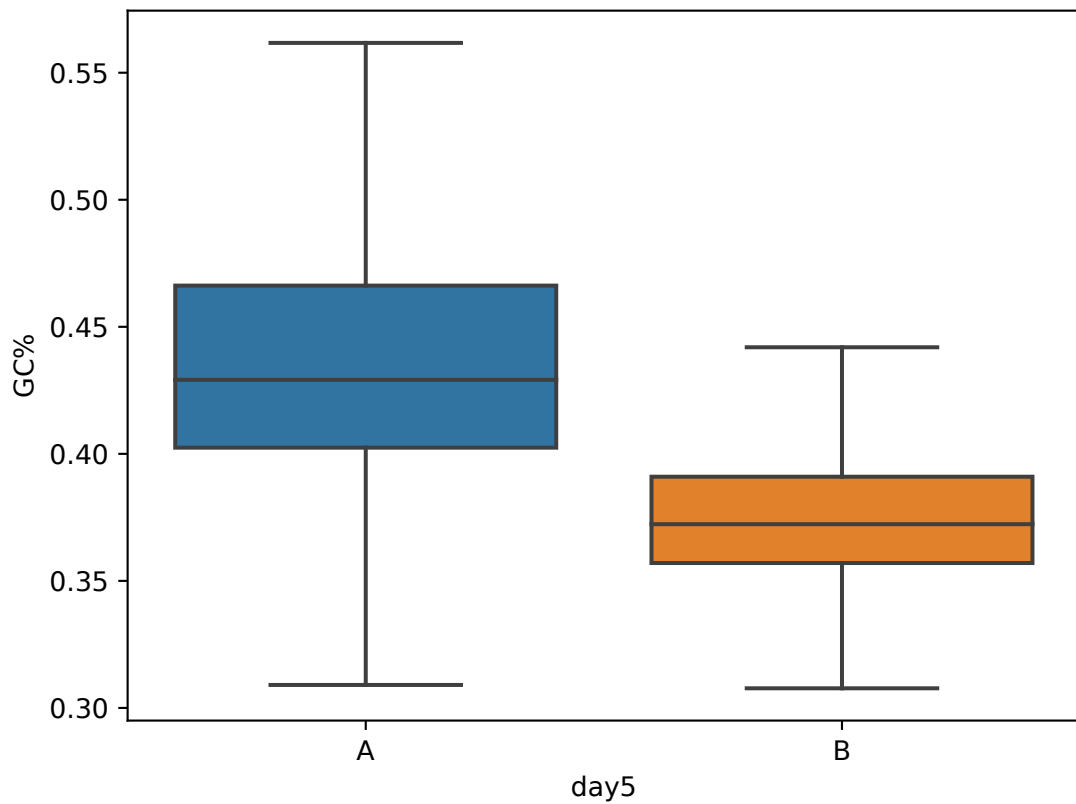

Supplement: Supplemental_Code_S3.tgz.zip [file day5_gc_content.pdf › TGIF_evaluation_scripts_by_supp_figure/SuppFig25C/figures/day5_gc_content.pdf]

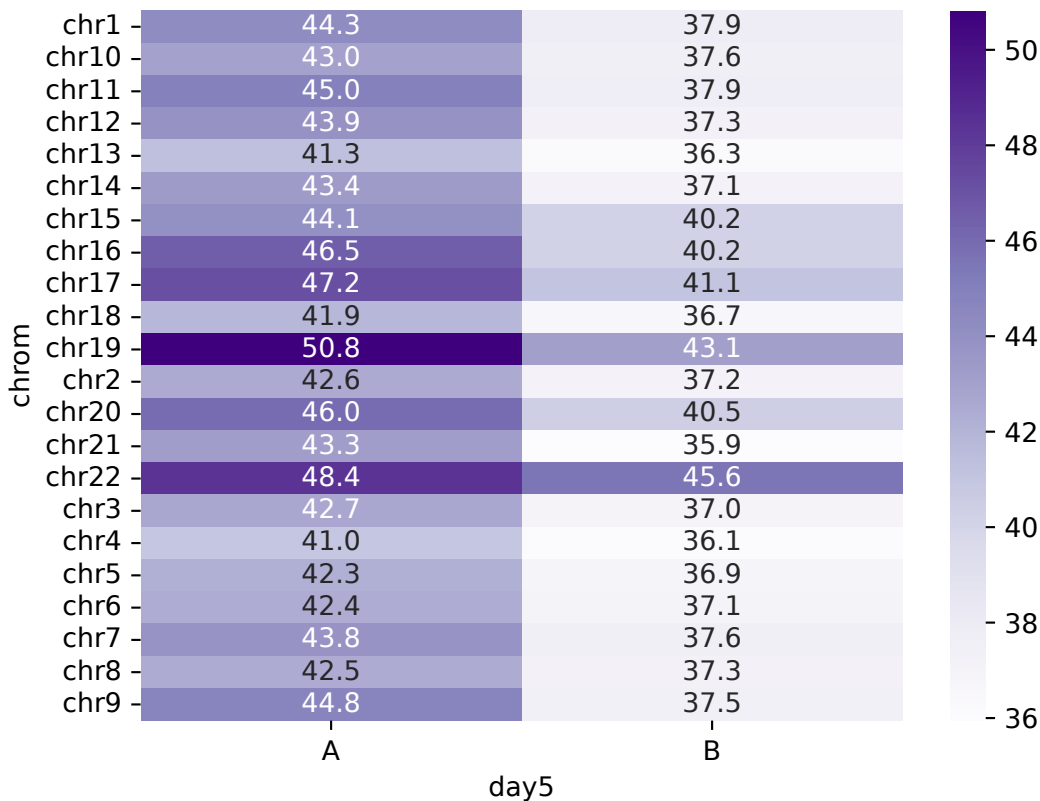

Supplement: Supplemental_Code_S3.tgz.zip [file day5_gc_per_chrom.pdf › TGIF_evaluation_scripts_by_supp_figure/SuppFig25C/figures/day5_gc_per_chrom.pdf]

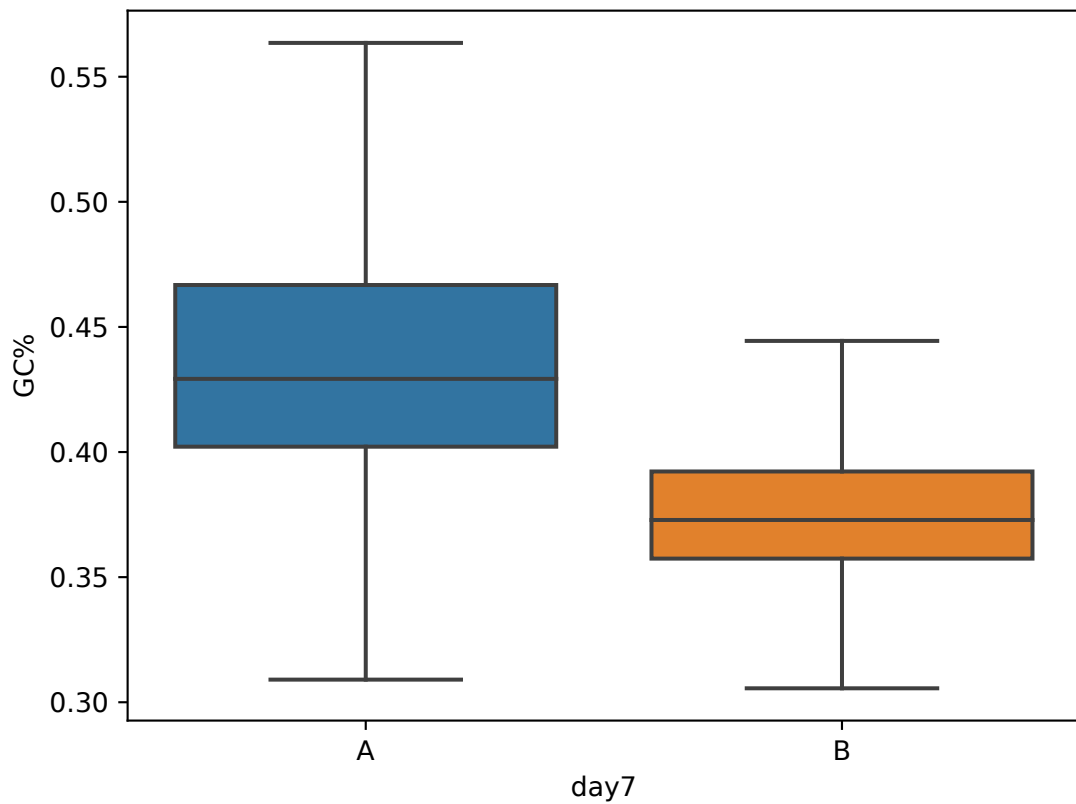

Supplement: Supplemental_Code_S3.tgz.zip [file day7_gc_content.pdf › TGIF_evaluation_scripts_by_supp_figure/SuppFig25C/figures/day7_gc_content.pdf]

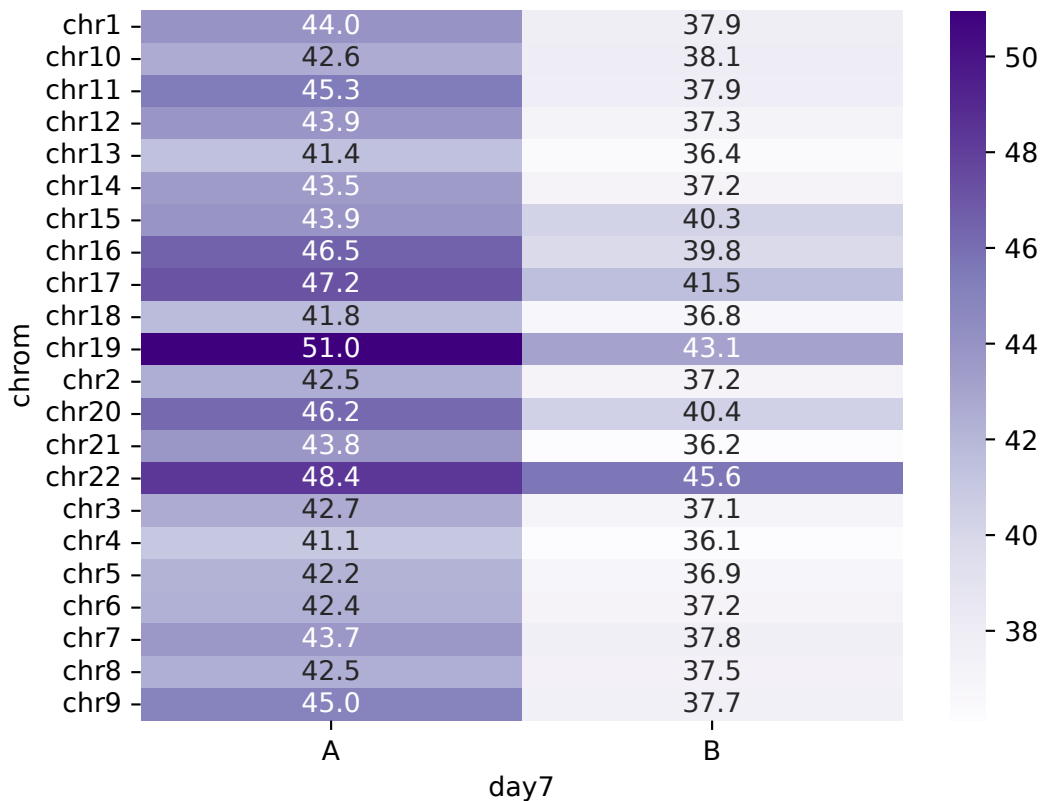

Supplement: Supplemental_Code_S3.tgz.zip [file day7_gc_per_chrom.pdf › TGIF_evaluation_scripts_by_supp_figure/SuppFig25C/figures/day7_gc_per_chrom.pdf]

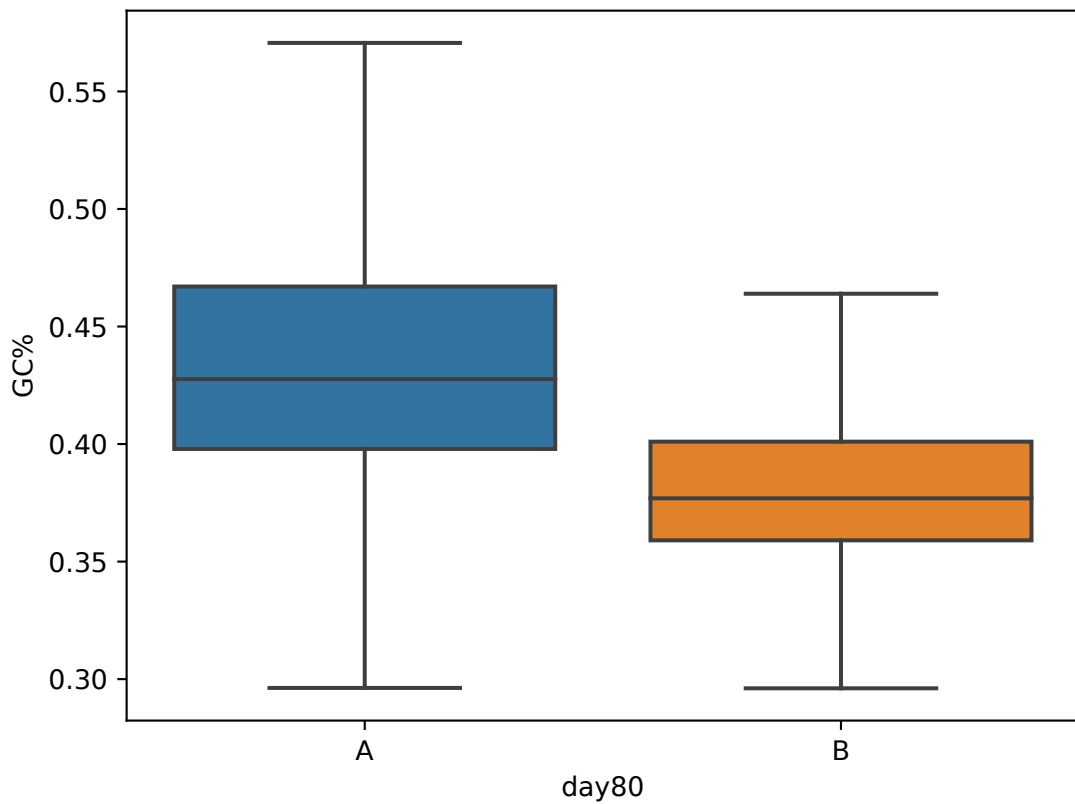

Supplement: Supplemental_Code_S3.tgz.zip [file day80_gc_content.pdf › TGIF_evaluation_scripts_by_supp_figure/SuppFig25C/figures/day80_gc_content.pdf]

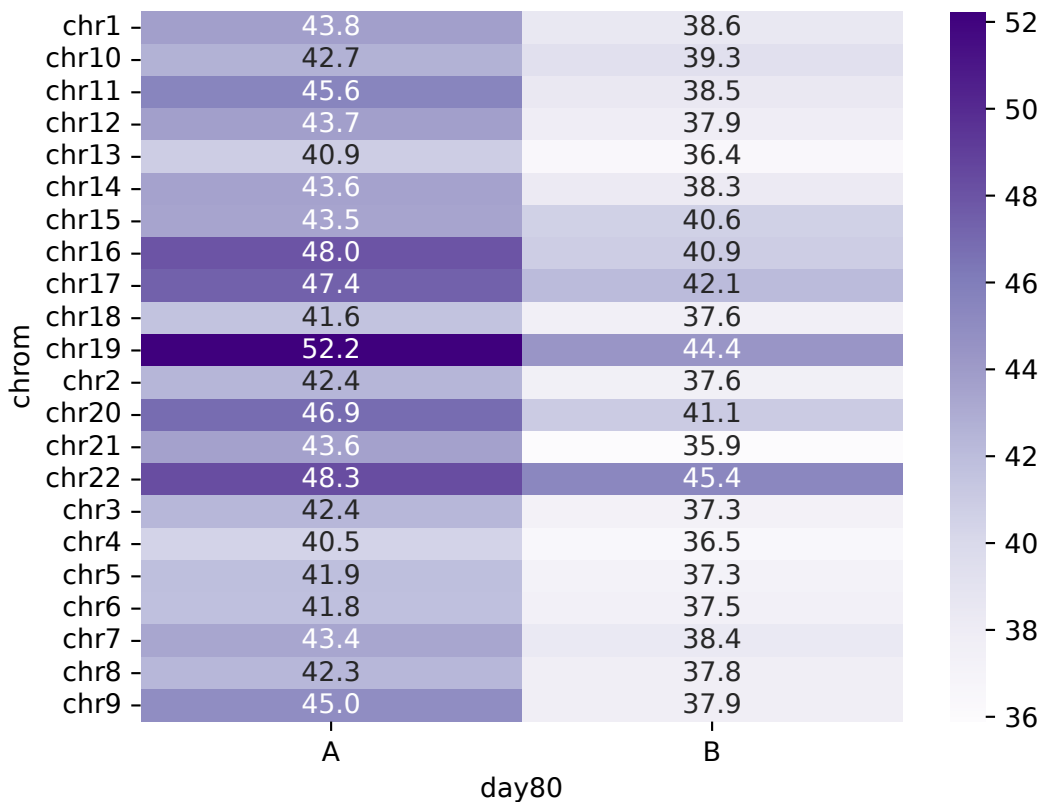

Supplement: Supplemental_Code_S3.tgz.zip [file day80_gc_per_chrom.pdf › TGIF_evaluation_scripts_by_supp_figure/SuppFig25C/figures/day80_gc_per_chrom.pdf]

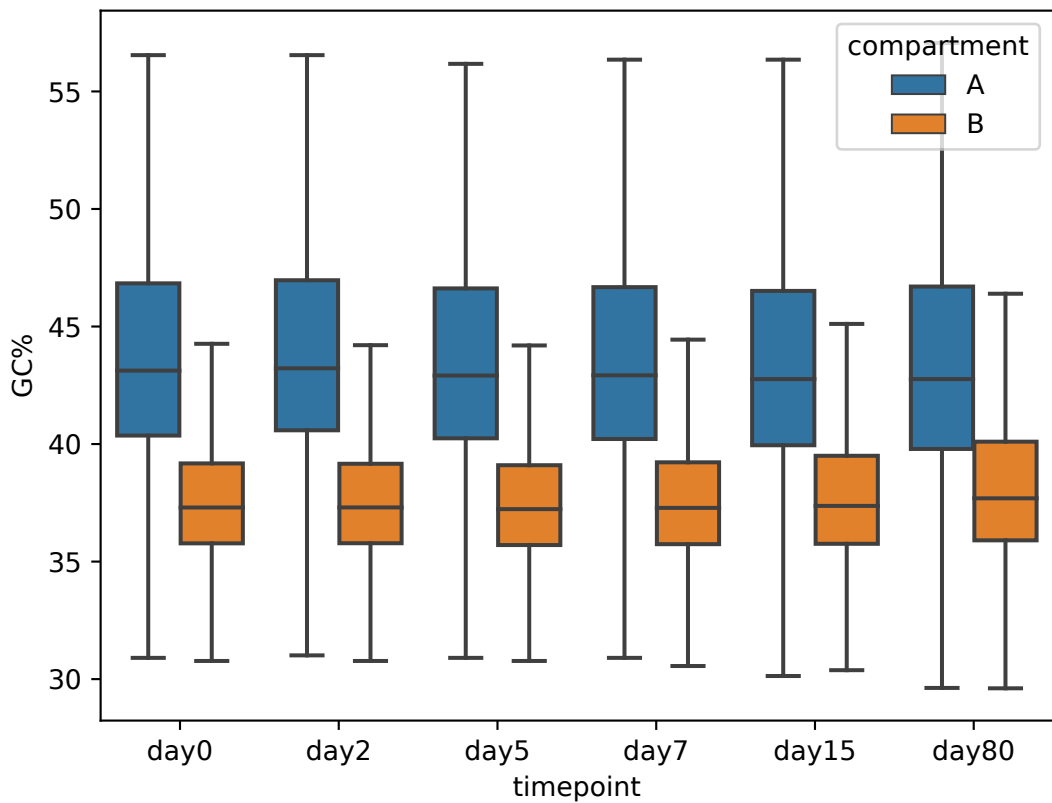

Supplement: Supplemental_Code_S3.tgz.zip [file gc_content.pdf › TGIF_evaluation_scripts_by_supp_figure/SuppFig25C/figures/gc_content.pdf]

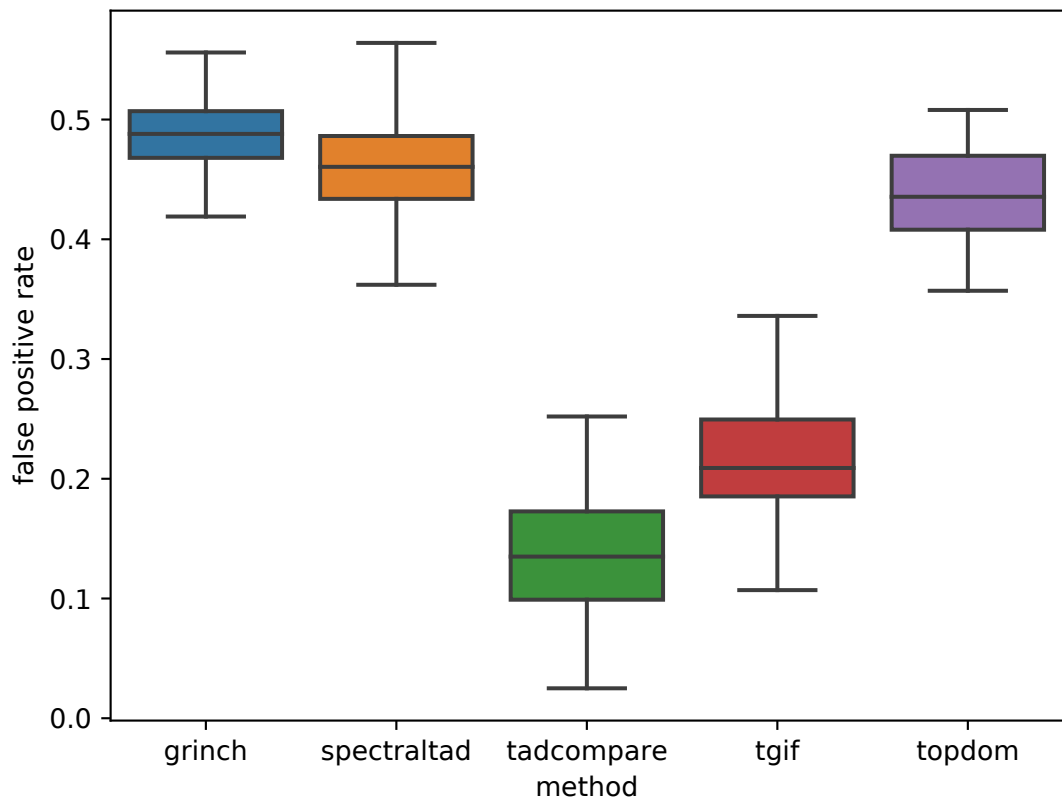

Supplement: Supplemental_Code_S3.tgz.zip [file compare_against_control.pdf › TGIF_evaluation_scripts_by_supp_figure/SuppFig3B/compare_against_control.pdf]

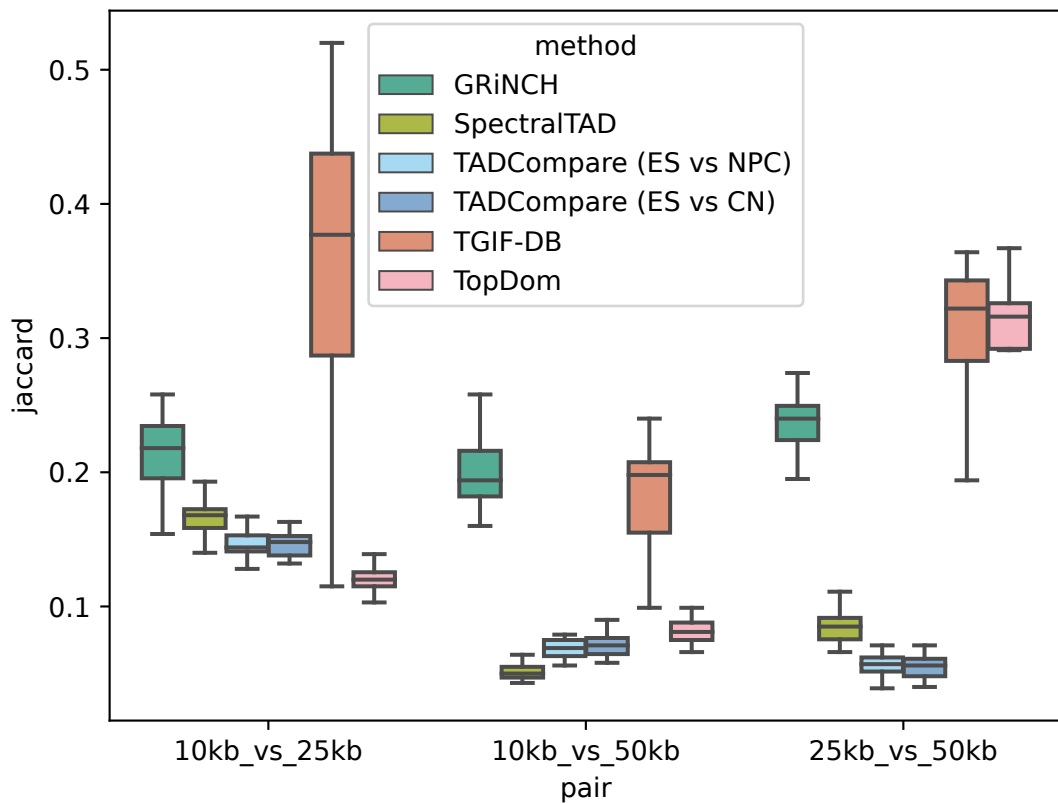

Supplement: Supplemental_Code_S3.tgz.zip [file jaccard_score.pdf › TGIF_evaluation_scripts_by_supp_figure/SuppFig3C/compile_jaccard/jaccard_score.pdf]

0-ES

0.753

0.655

1-NPC

0.793

1-NPC

2-CN

Rand Index

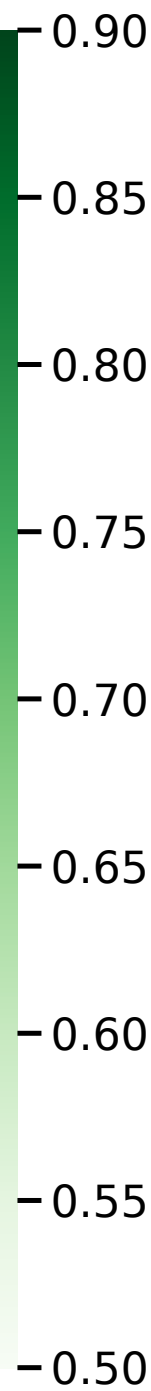

Supplement: Supplemental_Code_S3.tgz.zip [file rand_index.pdf › TGIF_evaluation_scripts_by_supp_figure/SuppFig6A/rand_index.pdf]

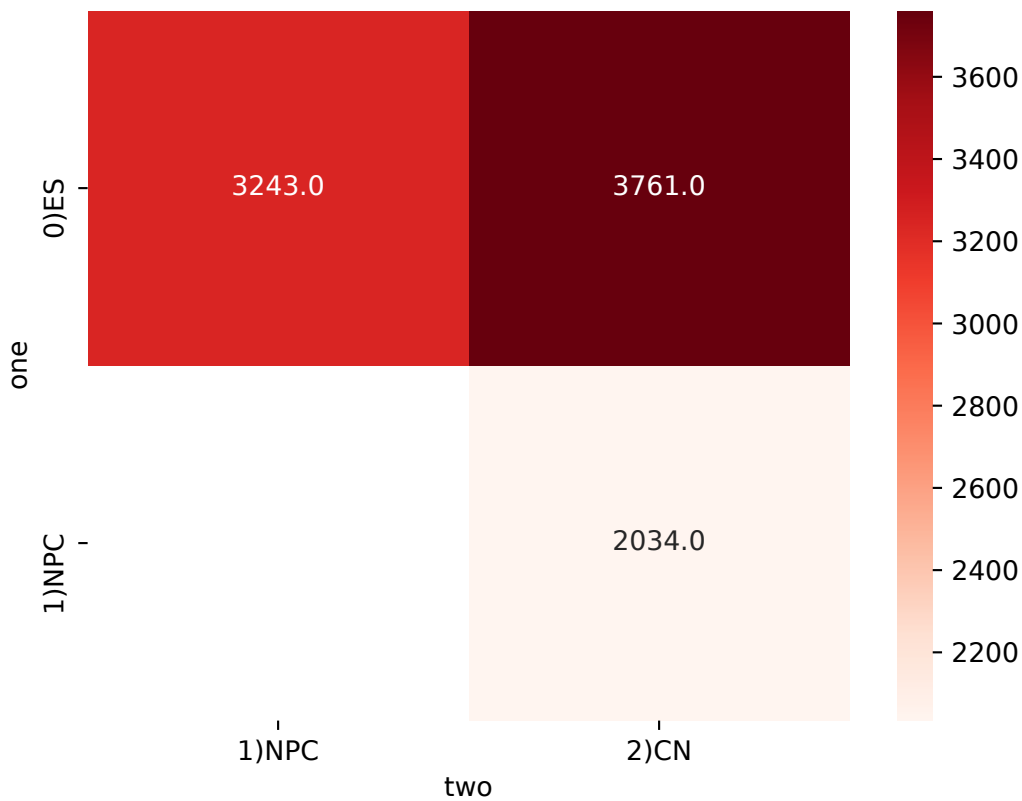

Supplement: Supplemental_Code_S3.tgz.zip [file count_sig_db_mouse.pdf › TGIF_evaluation_scripts_by_supp_figure/SuppFig6B_and_SuppFig10AC/count_sig_db_mouse.pdf]

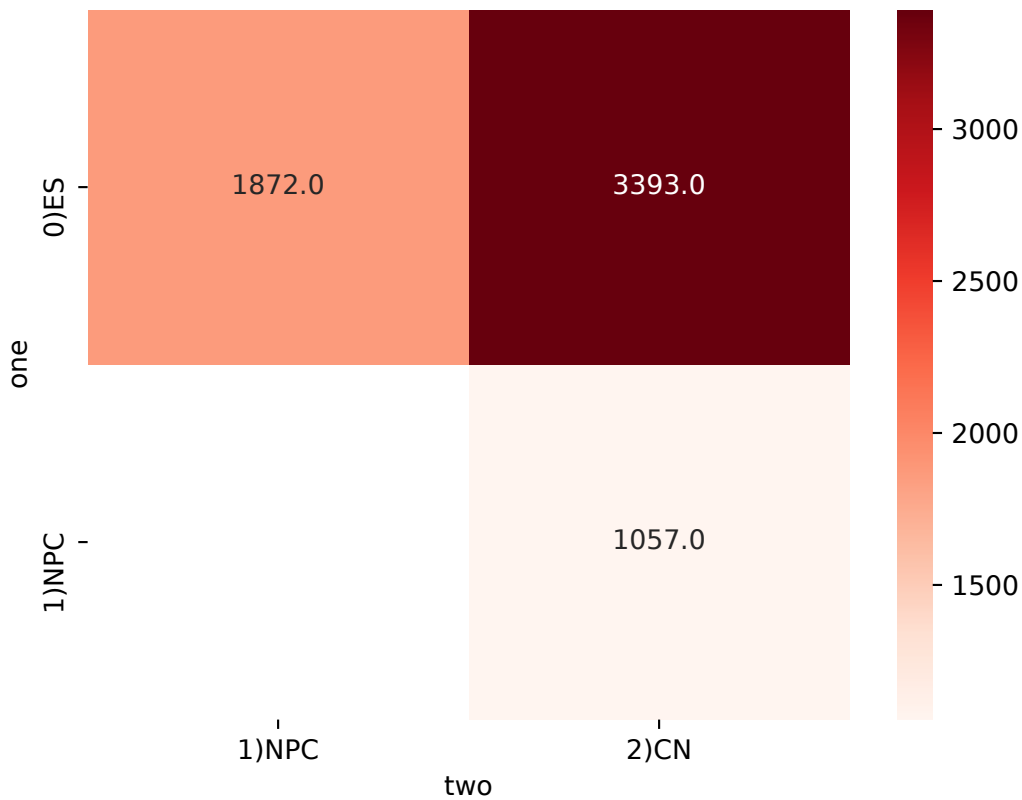

Supplement: Supplemental_Code_S3.tgz.zip [file count_sig_dc_mouse.pdf › TGIF_evaluation_scripts_by_supp_figure/SuppFig6B_and_SuppFig10AC/count_sig_dc_mouse.pdf]

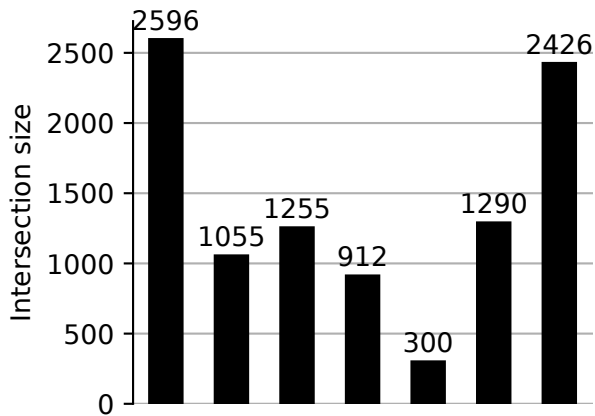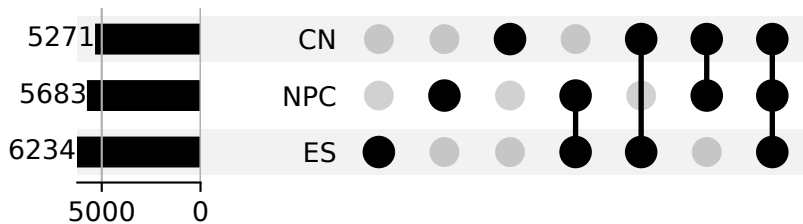

Supplement: Supplemental_Code_S3.tgz.zip [file upset_mouse.pdf › TGIF_evaluation_scripts_by_supp_figure/SuppFig6B_and_SuppFig10AC/upset_mouse.pdf]

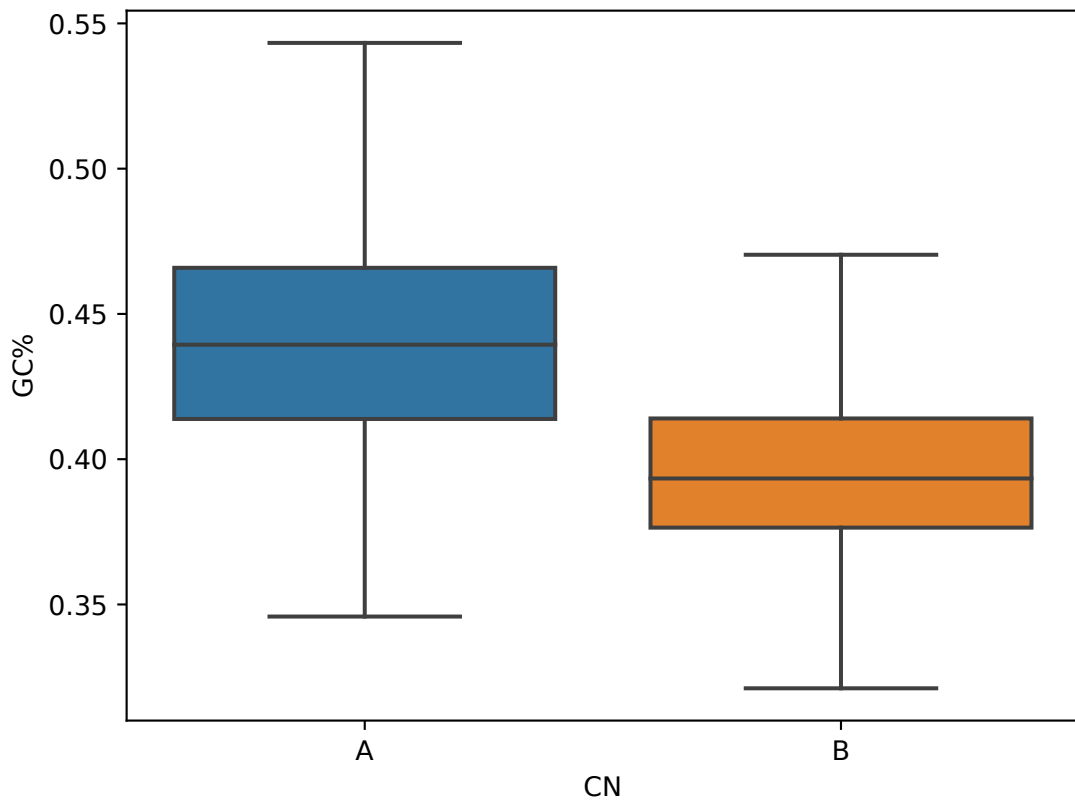

Supplement: Supplemental_Code_S3.tgz.zip [file CN_gc_content.pdf › TGIF_evaluation_scripts_by_supp_figure/SuppFig8AB/figures/CN_gc_content.pdf]

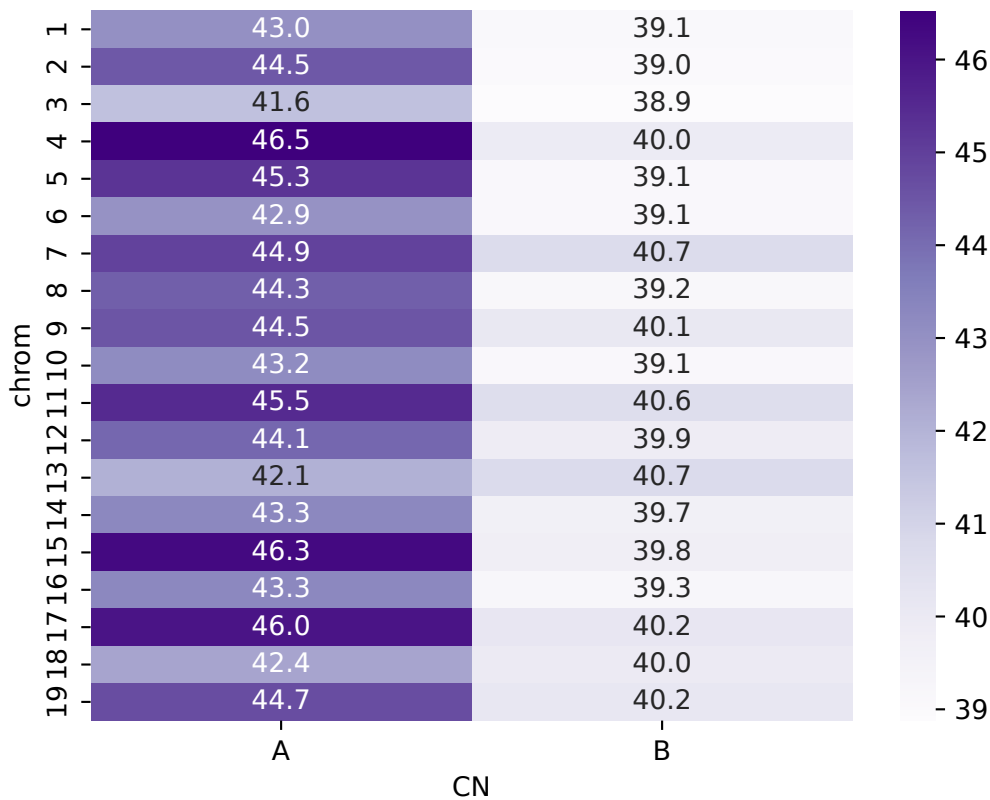

Supplement: Supplemental_Code_S3.tgz.zip [file CN_gc_per_chrom.pdf › TGIF_evaluation_scripts_by_supp_figure/SuppFig8AB/figures/CN_gc_per_chrom.pdf]

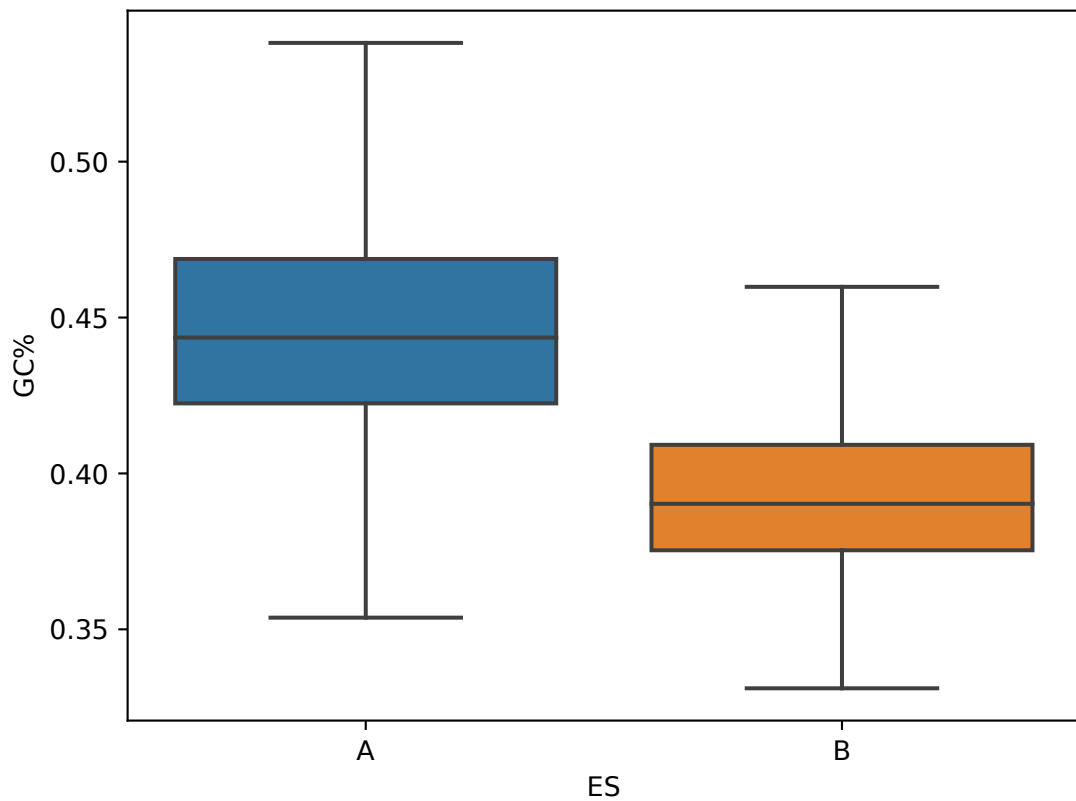

Supplement: Supplemental_Code_S3.tgz.zip [file ES_gc_content.pdf › TGIF_evaluation_scripts_by_supp_figure/SuppFig8AB/figures/ES_gc_content.pdf]

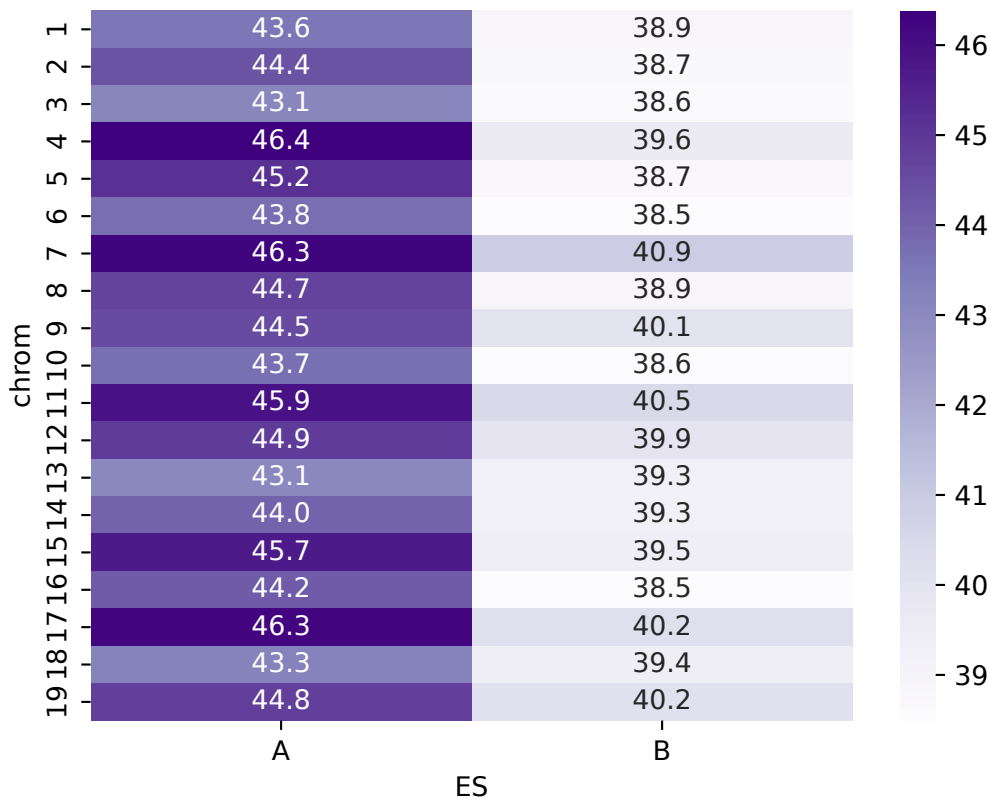

Supplement: Supplemental_Code_S3.tgz.zip [file ES_gc_per_chrom.pdf › TGIF_evaluation_scripts_by_supp_figure/SuppFig8AB/figures/ES_gc_per_chrom.pdf]

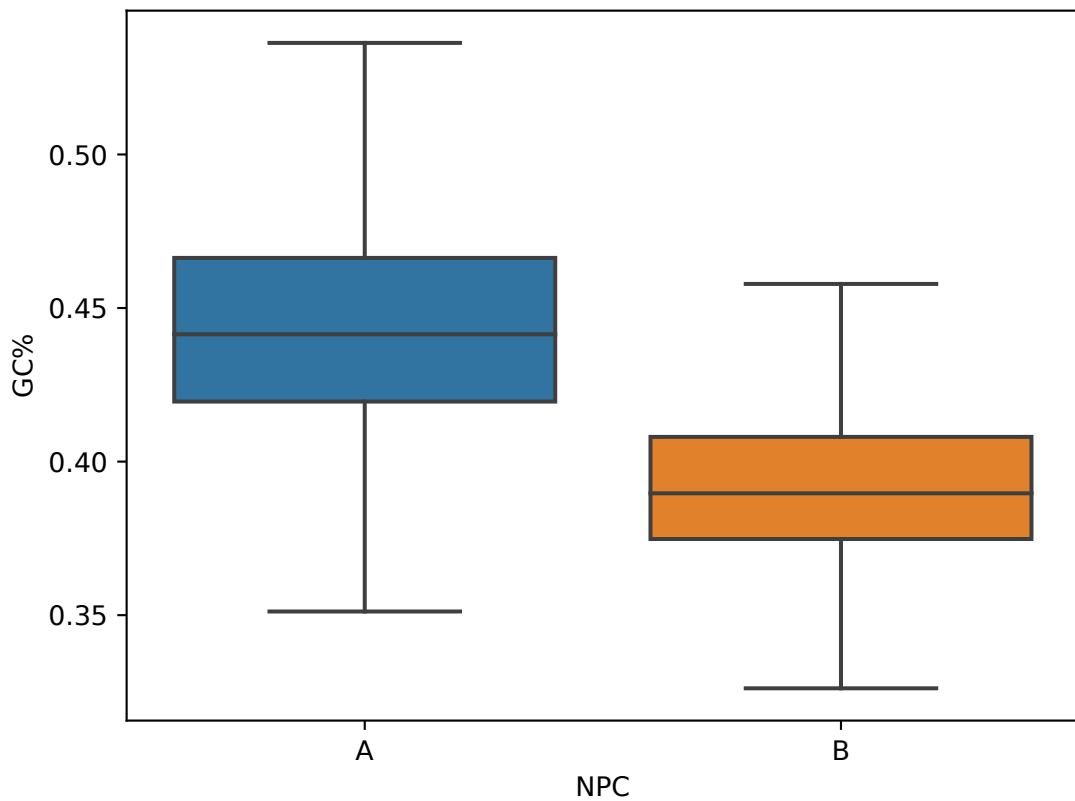

Supplement: Supplemental_Code_S3.tgz.zip [file NPC_gc_content.pdf › TGIF_evaluation_scripts_by_supp_figure/SuppFig8AB/figures/NPC_gc_content.pdf]

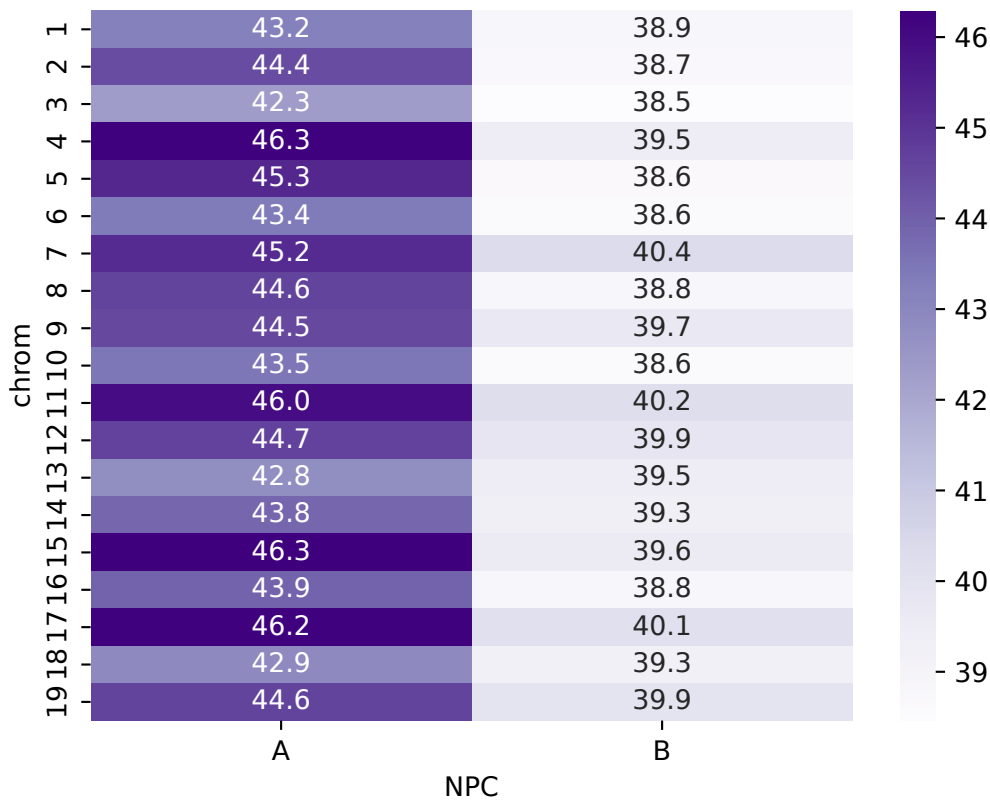

Supplement: Supplemental_Code_S3.tgz.zip [file NPC_gc_per_chrom.pdf › TGIF_evaluation_scripts_by_supp_figure/SuppFig8AB/figures/NPC_gc_per_chrom.pdf]

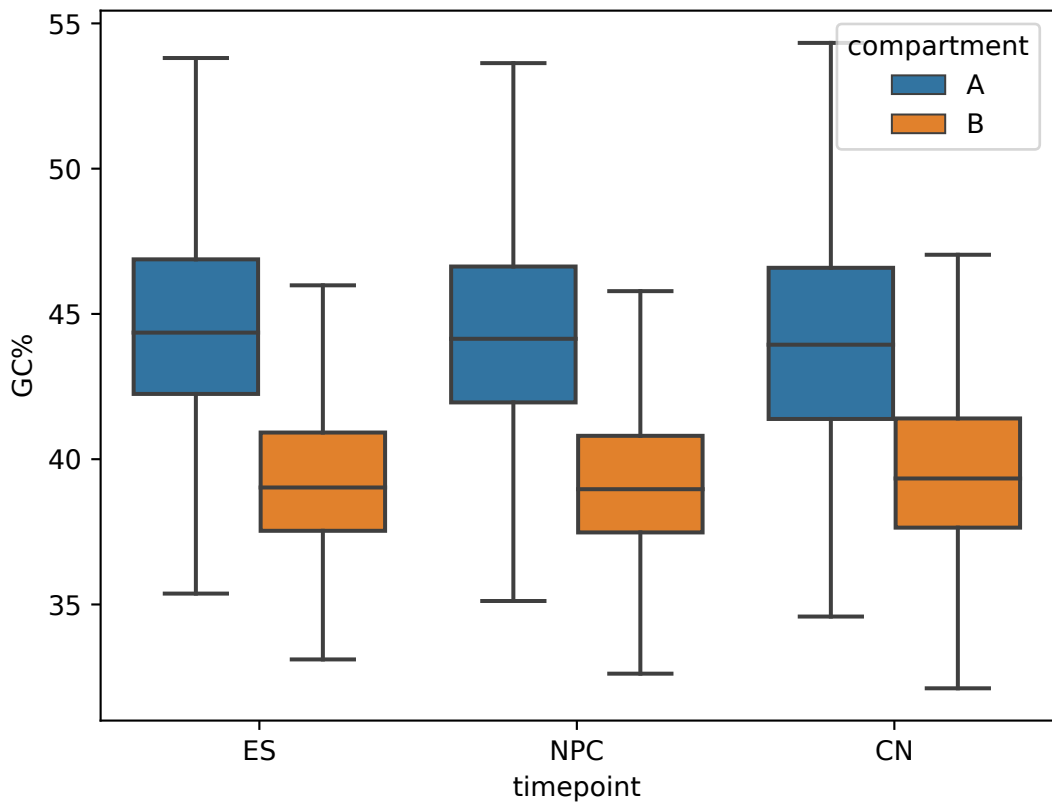

Supplement: Supplemental_Code_S3.tgz.zip [file gc_content.pdf › TGIF_evaluation_scripts_by_supp_figure/SuppFig8AB/figures/gc_content.pdf]
