# Supplementary figures and images for: Examining the dynamics of three-dimensional genome organization with multitask matrix factorization (part 2 of 2)
Source: HighWire-hosted journal article supplement (doi:10.1101/gr.279930.124), 2025-03-20

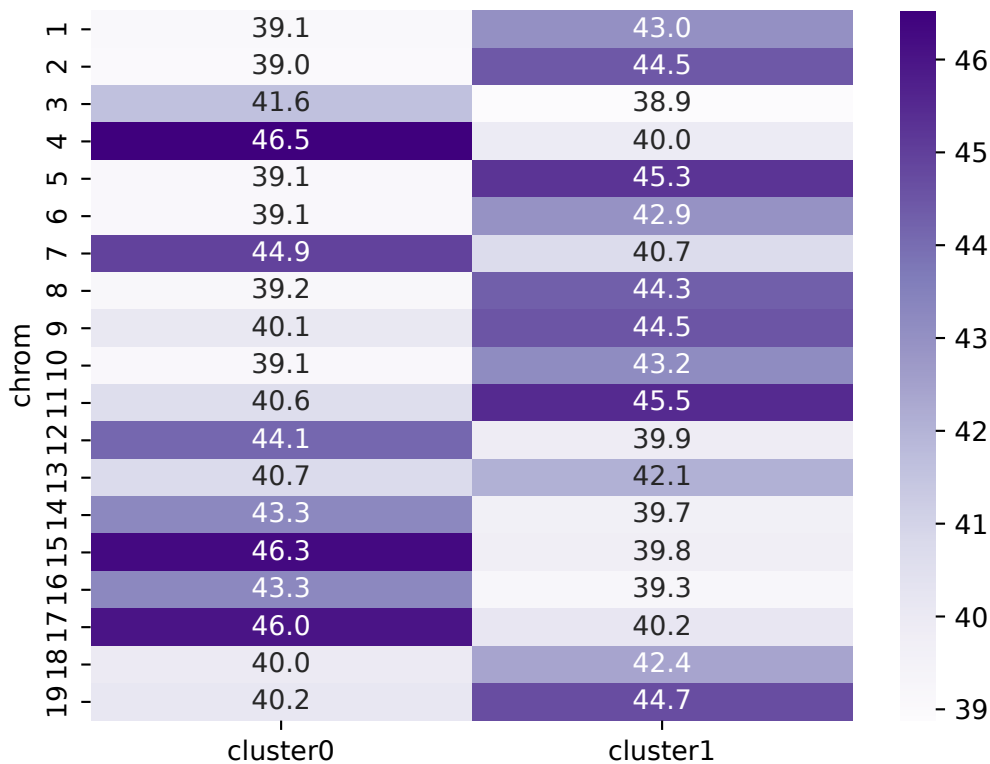

Supplement: Supplemental_Code_S3.tgz.zip [file CN.pdf › TGIF_evaluation_scripts_by_supp_figure/SuppFig8AB/mean_gc_per_cluster/CN.pdf]

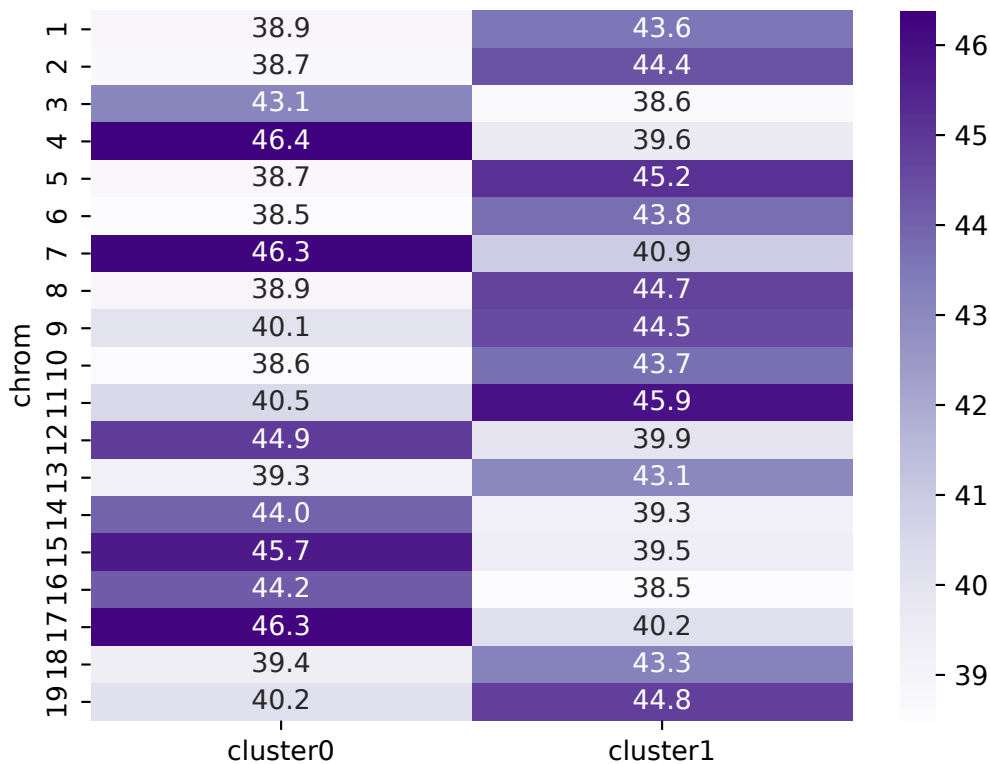

Supplement: Supplemental_Code_S3.tgz.zip [file ES.pdf › TGIF_evaluation_scripts_by_supp_figure/SuppFig8AB/mean_gc_per_cluster/ES.pdf]

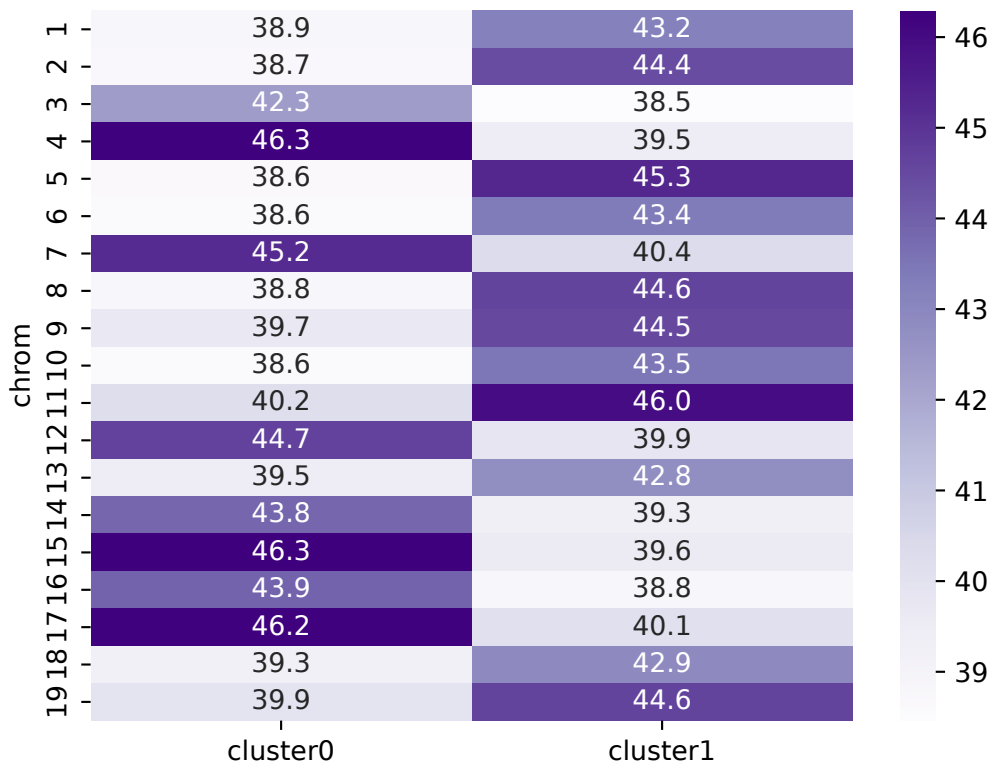

Supplement: Supplemental_Code_S3.tgz.zip [file NPC.pdf › TGIF_evaluation_scripts_by_supp_figure/SuppFig8AB/mean_gc_per_cluster/NPC.pdf]

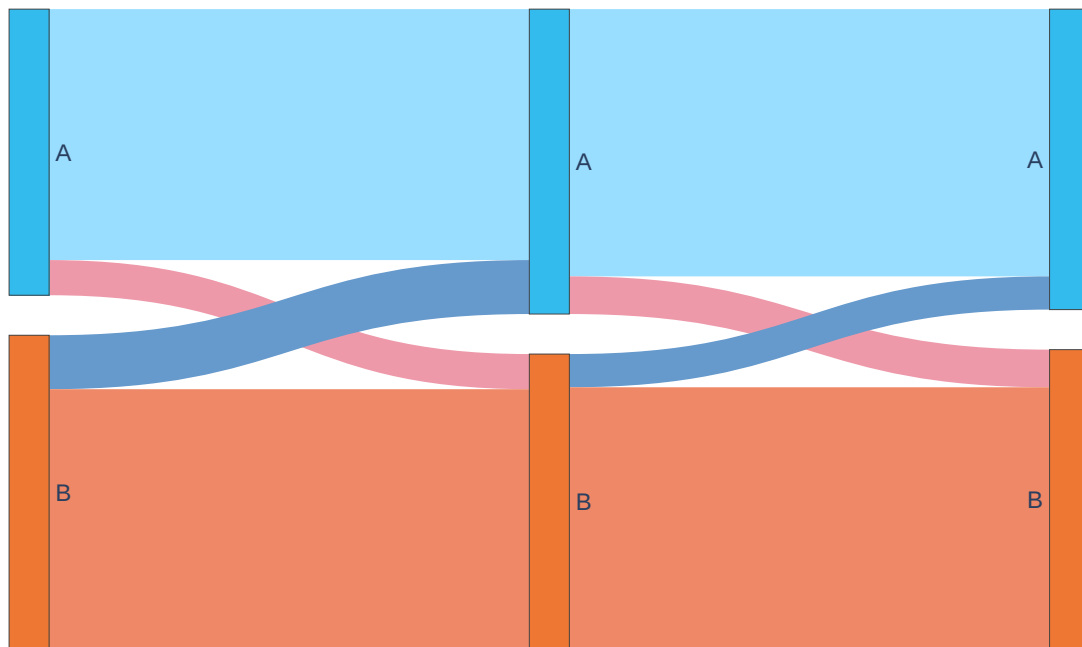

Supplement: Supplemental_Code_S3.tgz.zip [file sankey_neural_diff.pdf › TGIF_evaluation_scripts_by_supp_figure/SuppFig8C/sankey_neural_diff.pdf]

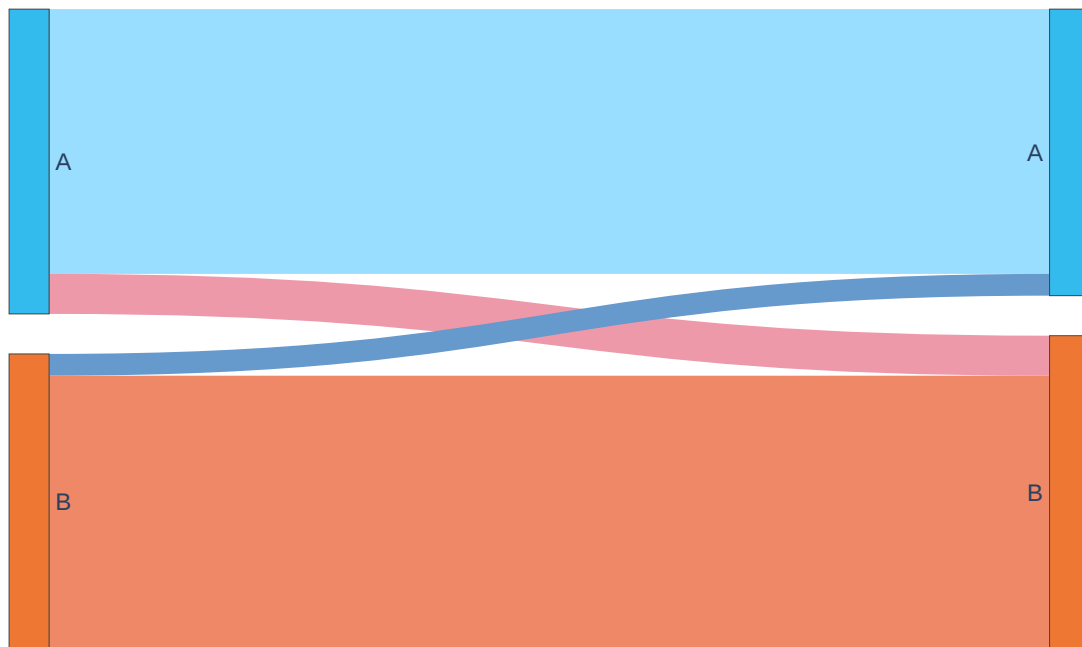

Supplement: Supplemental_Code_S3.tgz.zip [file sankey_h1_endoderm.pdf › TGIF_evaluation_scripts_by_supp_figure/SuppFig9A_SuppFig15_and_SuppFig24C/sankey_h1_endoderm.pdf]

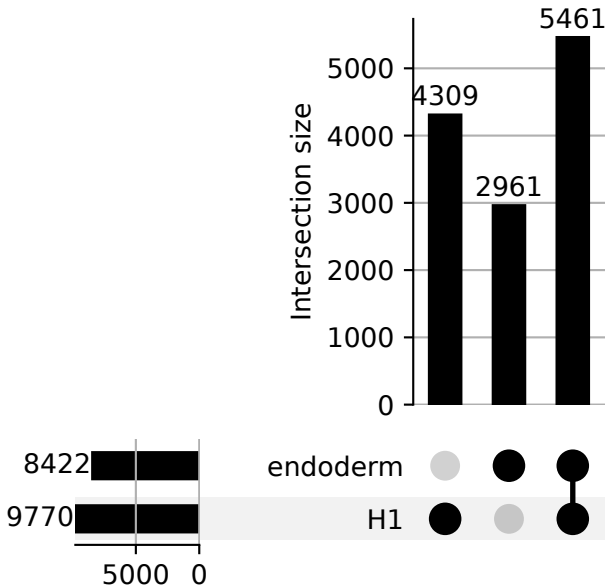

Supplement: Supplemental_Code_S3.tgz.zip [file upset_h1_endoderm.pdf › TGIF_evaluation_scripts_by_supp_figure/SuppFig9A_SuppFig15_and_SuppFig24C/upset_h1_endoderm.pdf]

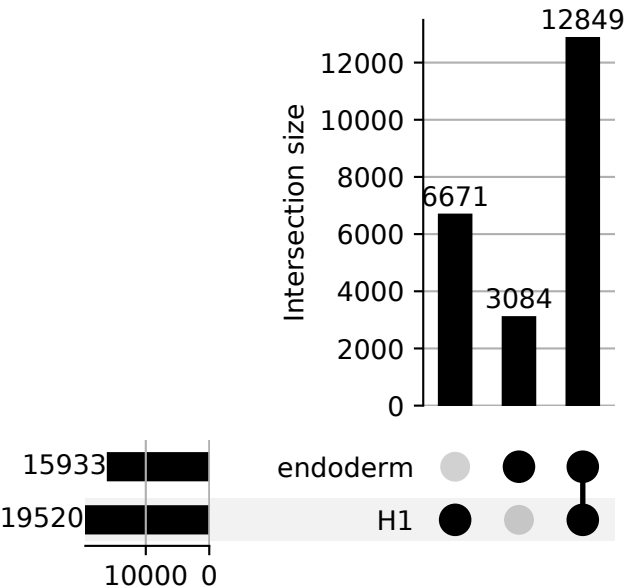

Supplement: Supplemental_Code_S3.tgz.zip [file upset_h1_endoderm_before_summit_filter.pdf › TGIF_evaluation_scripts_by_supp_figure/SuppFig9A_SuppFig15_and_SuppFig24C/upset_h1_endoderm_before_summit_filter.pdf]

**Figure S22**

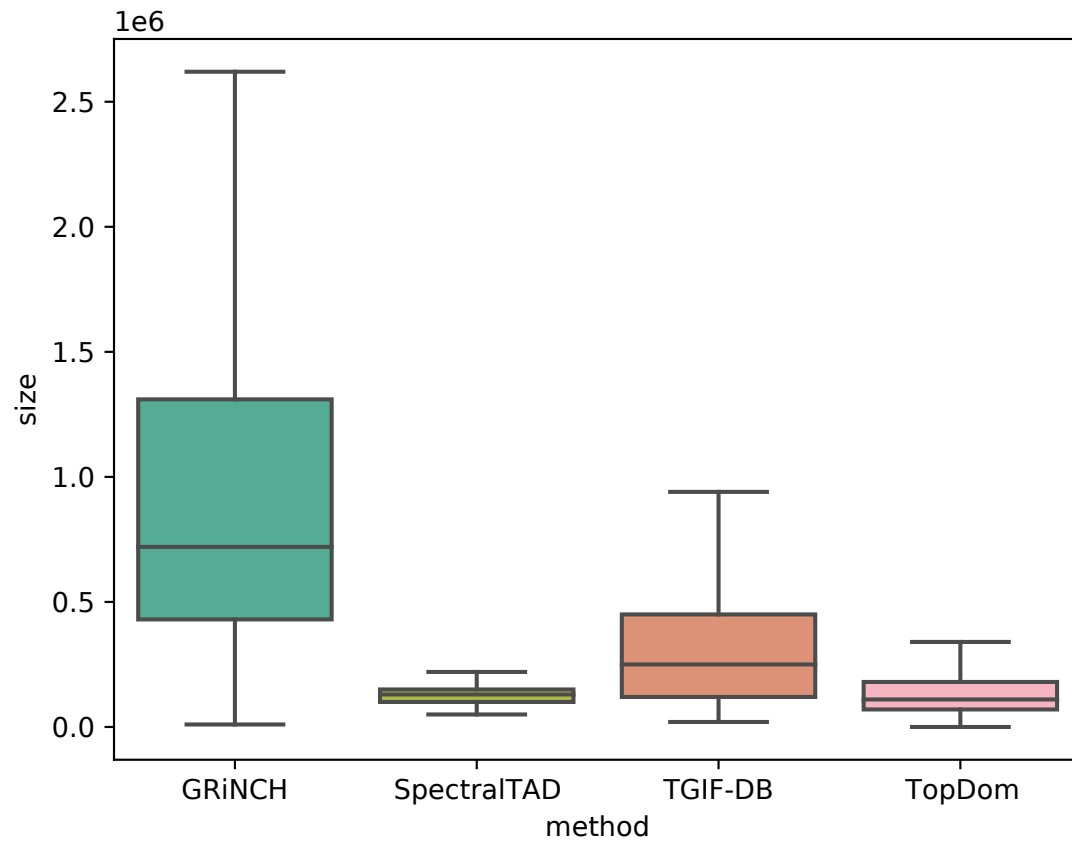

**Figure S22.** Distribution of TAD sizes (in basepairs) by method.

Supplement: Supplemental_Figures.zip [file Supplemental_Fig_S22.pdf › supp fig/Supplemental_Fig_S22.pdf]
